# Supplementary material for: Fungal Treatment for the Valorization of Technical Soda Lignin
Source: MDPI journal article supplement (doi:10.3390/jof7010039), 2021-01-09
Supplement: s1 [file s1]

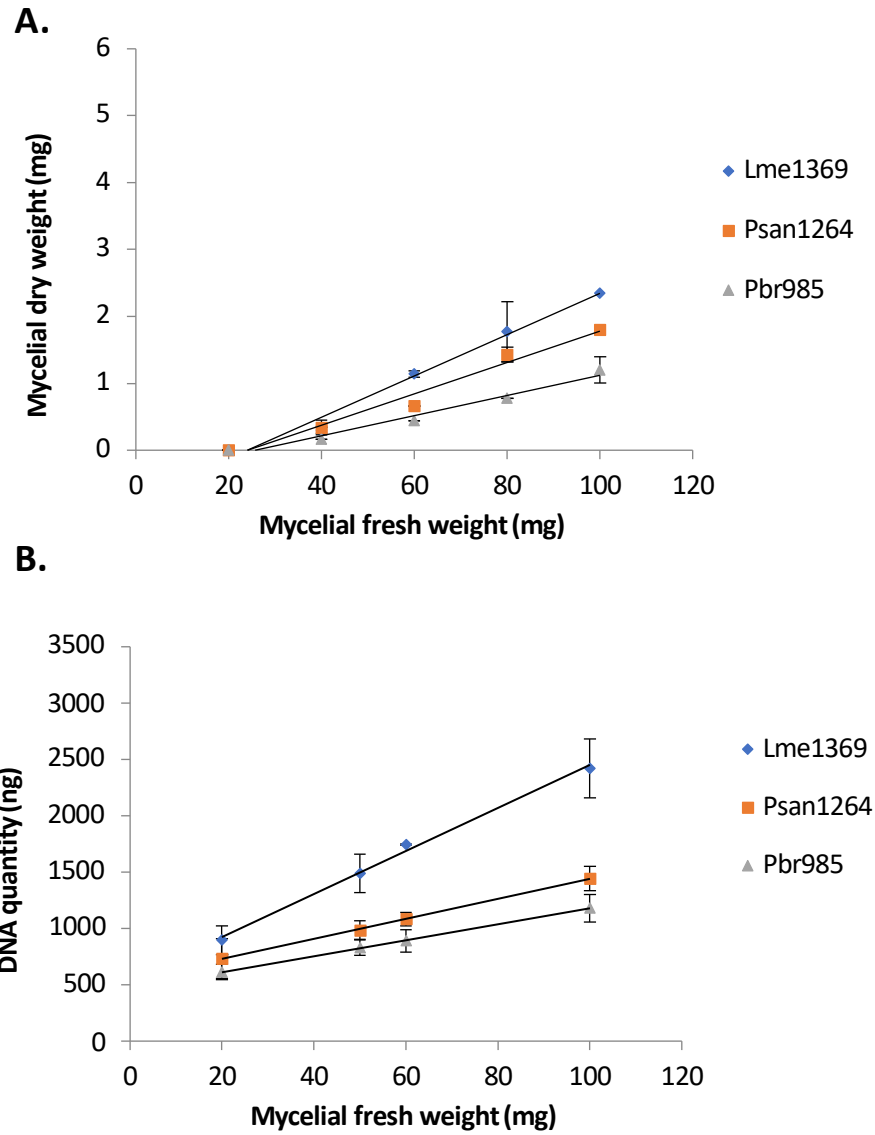

**Figure S1. Correlations between mycelial dry weight, mycelial fresh weight, and DNA quantity.**

Determination of (A) correlation between mycelial fresh weight and dry weight for Lme1369 ( $f = 0.0308x - 0.735$ ;  $R^2 = 0.9856$ ), Psan1264 ( $f = 0.0235x - 0.561$ ;  $R^2 = 0.9743$ ), and Pbr985 ( $f = 0.0151x - 0.39$ ;  $R^2 = 0.9741$ );

(B) correlation between DNA quantity and mycelial fresh weight for Lme1369 ( $f = 19.066x + 541.73$ ;  $R^2 = 0.9957$ ), Psan1264 ( $f = 8.8786x + 551.23$ ;  $R^2 = 0.9995$ ), and Pbr985 ( $f = 7.0496x + 473.4$ ;  $R^2 = 0.9996$ )

#### *LC-MS/MS Q-Exactive Plus analysis*

Protein digest was loaded at 7.5  $\mu\text{L}/\text{min}$  on a precolumn (C18 particle 5  $\mu\text{m}$  size, 20 mm length, 100  $\mu\text{m}$  i.d., NanoSeparation) and desalted with 0.1 % formic acid in 2 % ACN. After 4 min, the precolumn was connected to a separating column (C18 particle 3  $\mu\text{m}$  size, 300 mm length, 75  $\mu\text{m}$  i.d., NanoSeparation). Buffers were 0.1 % formic acid in water (solvent A) and 0.1 % formic acid in ACN (solvent B). Peptide separation was achieved using a linear gradient from 5 to 35 % of solvent B for 75 min at 300 nL/min totaling 95 min including the regeneration and equilibration steps.

MS data acquisition included a full MS scan covering 350 to 1400 mass-to-charge ratio ( $m/z$ ) with a resolution of 70000. HCD fragmentation (MS/MS) step was reiterated for the 8 major ions detected during the full MS scan with normalized collision energy of 27 and a resolution of 17500.

#### *LC-MS/MS LTQ-orbitrap analysis*

Protein digest was injected and preconcentrated on a precolumn (Acclaim PepMap C18 particle 5  $\mu\text{m}$  size, 5 mm length, 300  $\mu\text{m}$  i.d., Thermo Fisher Scientific) at 20  $\mu\text{L}/\text{min}$  with 0.08 % TFA in 2 % ACN in 2 min, followed by a separation on reverse phase separating column (Acclaim PepMap RSLC nanoViper, C18 particle 2  $\mu\text{m}$  size, 150 mm length, 75  $\mu\text{m}$  i.d., Thermo Fisher Scientific). Buffers were 0.1 % formic acid in 98 % water (solvent A) and 0.1 % formic acid in 80 % ACN (solvent B). The peptides were eluted with a multi-step gradient from 1 to 35 % of solvent B for 79 min at 300 nL/min for a total run of 90 min.

MS scans were acquired in a mass range of  $m/z$  300-1400 at a resolution of 15000 in the orbitrap analyser. The 8 most intense ions were selected for CID MS/MS with normalized collision energy of 35 in the ion trap.

**Experiment description S2.** Parameters and conditions for the LC-MS/MS Q-Exactive Plus and LC-MS/MS LTQ-orbitrap analyses.

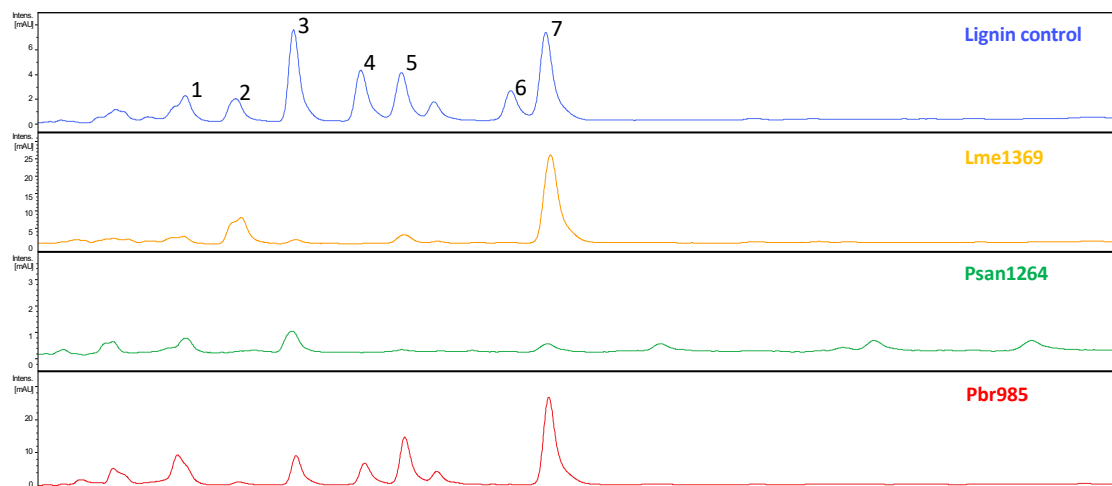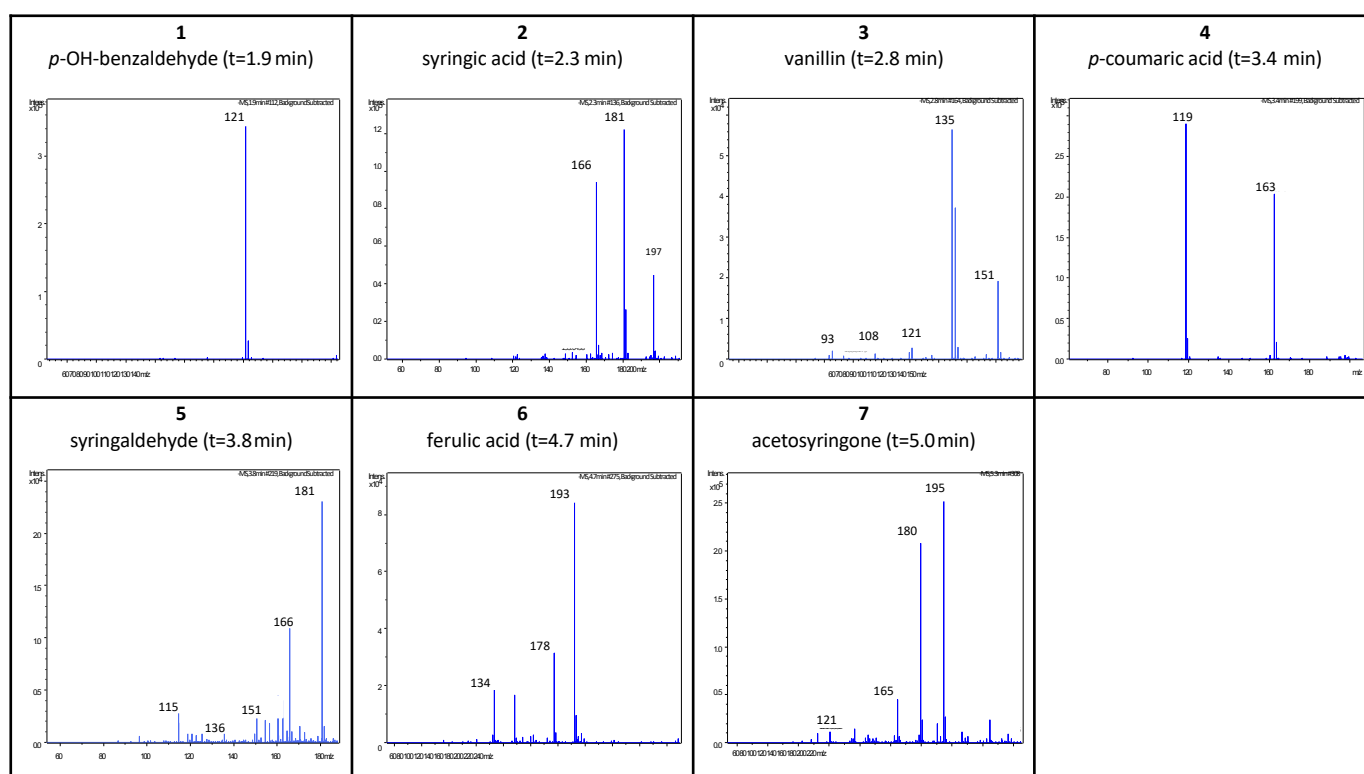

**Figure S3. LC-MS analysis on water-soluble lignin fraction.** The analysis is done on phenolic monomers extracted from the culture supernatant by ethyl acetate. Normalized chromatograms obtained with a C18 column (Highpurity, Thermo Electron Corporation, 2.7  $\mu$ m, 50 mm x 2 mm I.D.mm), a 5–100 % vol. aqueous acetonitrile, 1% HCOOH gradient (30 min) and 0.4 ml.min<sup>-1</sup> flow rate, and with a 280 nm UV detection. ESI-MS spectra were obtained in the negative mode from scans acquired in a mass range of m/z 120–2000.

| Strain  | Protein ID | Signal Peptide |
|---------|------------|----------------|
| Pbr 985 | 1421205    | No             |
|         | 1485200    | Yes            |
|         | 1405628    | No             |
|         | 1355486    | Yes            |
|         | 1401242    | Yes            |
|         | 1551444    | No             |
|         | 1483812    | Yes            |
|         | 1362054    | Yes            |
|         | 1348020    | No             |
|         | 1375769    | No             |
|         | 1393086    | No             |
|         | 1410586    | No             |
|         | 1346110    | No             |
|         | 1359728    | No             |
|         | 1408082    | No             |
|         | 1412015    | No             |
|         | 1481969    | No             |
|         | 1392401    | No             |
|         | 1411356    | No             |
|         | 1449227    | No             |
|         | 1399305    | No             |
|         | 1357935    | Yes            |

| Strain       | Protein ID | Signal Peptide |
|--------------|------------|----------------|
| Psan1<br>264 | 1671724    | Yes            |
|              | 1758278    | Yes            |
|              | 1538639    | No             |
|              | 1593127    | No             |
|              | 1593246    | No             |
|              | 1622182    | No             |
|              | 1561162    | No             |
|              | 1573469    | No             |
|              | 1573641    | No             |
|              | 1657735    | No             |
|              | 790266     | Yes            |
|              | 1652042    | No             |
| Lme1<br>369  | 1115561    | No             |
|              | 984637     | Yes            |
|              | 909456     | Yes            |
|              | 1052862    | Yes            |
|              | 1013677    | No             |
|              | 1006560    | Yes            |
|              | 916898     | No             |
|              | 924929     | Yes            |
|              | 1050535    | No             |
|              | 46074      | Yes            |
|              | 969197     | No             |

| Strain | Protein ID | Signal Peptide |
|--------|------------|----------------|
|        | 930863     | No             |
|        | 271833     | Yes            |
|        | 926020     | No             |
|        | 1055291    | Yes            |
|        | 1059517    | No             |
|        | 377270     | Yes            |
|        | 971010     | No             |
|        | 974261     | No             |
|        | 909220     | No             |
|        | 1046738    | No             |
|        | 954400     | No             |
|        | 1105316    | Yes            |
|        | 1087844    | Yes            |
|        | 668678     | No             |
|        | 995449     | No             |
|        | 924154     | Yes            |
|        | 326091     | Yes            |
|        | 1058666    | No             |
|        | 1108970    | Yes            |

**Table S5.** Other proteins identified in the secretomes on lignin alone and their predicted signal peptides.
