# Supplementary material for: Fungal Treatment for the Valorization of Technical Soda Lignin
Source: J Fungi (Basel). 2021 Jan 9;7(1):39. doi: 10.3390/jof7010039 (PMC7827817; doi:10.3390/jof7010039)
Supplement: Supplementary file 1 [file jof-07-00039-s001.zip › jof-1060745-suppl.xlsx]

## Sheet: Compare spectra Pbr985 Q-Exa
Proteomics complementary data for Pbr985. Number of identified spectra in each condition (Maltose + Lignin and Lignin) at days 7 and 14 following the Q-Exactive analysis methods.
Group ID	Sub-group ID	Protein Description	Number of proteins	Day3_Maltose+Lignin	Day 3_Lignin	Day7_Maltose+Lignin	Day 7_Lignin	Day14_Maltose+Lignin	Day14_Lignin
a1	a1.a1	jgi|Polbr1|224137|CE224136_76555|AA1_1|Laccase|IPR001117|Multicopper oxidase, type 1|IPR011706|Multicopper oxidase, type 2|IPR011707|Multicopper oxidase, type 3|IPR002355|Multicopper oxidase, copper-binding site|IPR008972|Cupredoxin|	1	0	0	54	2	35	4
a1	a1.a2	jgi|Polbr1|657909|CE657908_4567|AA1_1|Laccase|IPR001117|Multicopper oxidase, type 1|IPR011706|Multicopper oxidase, type 2|IPR011707|Multicopper oxidase, type 3|IPR002355|Multicopper oxidase, copper-binding site|IPR008972|Cupredoxin|	1	1	1	19	0	8	0
a1	a1.a3	jgi|Polbr1|435106|CE435105_4217|AA1_1|Laccase|IPR001117|Multicopper oxidase, type 1|IPR011706|Multicopper oxidase, type 2|IPR011707|Multicopper oxidase, type 3|IPR002355|Multicopper oxidase, copper-binding site|IPR008972|Cupredoxin|	1	0	0	8	0	6	0
a2	a2.a1	jgi|Polbr1|1388977|estExt_Genewise1.C_680026|AA7|Glucooligosaccharide oxidase|IPR006094|FAD linked oxidase, N-terminal|IPR012951|Berberine/berberine-like|IPR016166|FAD-binding, type 2|	1	2	4	37	10	39	8
a3	a3.a1	jgi|Polbr1|1407721|fgenesh1_kg.56_#_34_#_Locus1356v1rpkm116.62|GH76|Glycoside Hydrolase Family 76 protein|IPR005198|Glycoside hydrolase, family 76|IPR008928|Six-hairpin glycosidase-like|	1	0	0	34	9	14	1
a4	a4.a1	jgi|Polbr1|1500721|MIX9437_110063_81|GH92|Glycoside Hydrolase Family 92 protein|IPR012939|Glycosyl hydrolase 92|IPR005887|Alpha-1,2-mannosidase, putative|IPR008928|Six-hairpin glycosidase-like|	1	0	1	25	0	21	3
a4	a4.a2	jgi|Polbr1|1400602|fgenesh1_kg.13_#_147_#_Locus1500v1rpkm106.56|GH92|Glycoside Hydrolase Family 92 protein|IPR012939|Glycosyl hydrolase 92|IPR008928|Six-hairpin glycosidase-like|IPR016040|NAD(P)-binding|	1	0	0	5	0	4	0
a5	a5.a1	jgi|Polbr1|1347831|e_gw1.18.256.1|	1	4	8	13	4	7	2
a5	a5.a2	jgi|Polbr1|346399|CE346398_94425|	1	5	7	9	5	7	4
a6	a6.a1	jgi|Polbr1|1349191|e_gw1.22.85.1|GH15-CBM20|Glycoside Hydrolase Family 15 / Carbohydrate-Binding Module Family 20 protein|IPR002044|Glycoside hydrolase, carbohydrate-binding|IPR000165|Glycoside hydrolase, family 15|IPR002044|Glycoside hydrolase, carbohydrate-binding|IPR011613|Glycoside hydrolase 15-related|IPR008291|Glucan 1,4-alpha-glucosidase, starch-binding|IPR002044|Glycoside hydrolase, carbo…	1	0	2	25	3	14	1
a7	a7.a1	jgi|Polbr1|748989|CE748988_52067|IPR014870|Region of unknown function DUF1793|IPR008928|Six-hairpin glycosidase-like|	1	0	2	8	14	8	8
a8	a8.a1	jgi|Polbr1|1408208|fgenesh1_kg.61_#_22_#_Locus7163v1rpkm15.19|IPR000868|Isochorismatase hydrolase|IPR000868|Isochorismatase hydrolase|	1	0	3	16	2	16	1
a9	a9.a1	jgi|Polbr1|1488971|gm1.12552_g|GH55|Glycoside Hydrolase Family 55 protein|IPR011050|Pectin lyase fold/virulence factor|	1	0	1	19	1	17	0
b10	b10.a1	jgi|Polbr1|1401868|fgenesh1_kg.18_#_119_#_Locus174v1rpkm732.12|	1	1	3	6	8	9	4
b11	b11.a1	jgi|Polbr1|1420175|fgenesh1_pg.49_#_18|AA5_1|Copper radical oxidase|IPR009880|Glyoxal oxidase, N-terminal|IPR015202|Region of unknown function DUF1929|IPR011043|Galactose oxidase/kelch, beta-propeller|IPR014756|Immunoglobulin E-set|	1	1	3	12	2	9	2
b12	b12.a1	jgi|Polbr1|1338184|e_gw1.3.371.1|GH27|Glycoside Hydrolase Family 27 protein|IPR000111|Glycoside hydrolase, clan GH-D|IPR002241|Glycoside hydrolase, family 27|IPR000111|Glycoside hydrolase, clan GH-D|IPR000111|Glycoside hydrolase, clan GH-D|IPR017853|Glycoside hydrolase, catalytic core|	1	0	4	12	2	8	0
b13	b13.a1	jgi|Polbr1|1364383|e_gw1.130.38.1|IPR001461|Peptidase A1|IPR001461|Peptidase A1|IPR001969|Peptidase aspartic, active site|IPR009007|Peptidase aspartic, catalytic|	1	0	0	4	5	11	3
b14	b14.a1	jgi|Polbr1|1447784|estExt_Genewise1Plus.C_970077|GH28|Glycoside Hydrolase Family 28 protein|IPR000743|Glycoside hydrolase, family 28|IPR006626|Parallel beta-helix repeat|IPR000743|Glycoside hydrolase, family 28|IPR011050|Pectin lyase fold/virulence factor|	1	0	0	10	2	9	1
b15	b15.a1	jgi|Polbr1|1400569|fgenesh1_kg.13_#_114_#_Locus4315v3rpkm0.36_PRE|IPR002018|Carboxylesterase, type B|IPR002018|Carboxylesterase, type B|	1	0	0	12	0	8	0
b16	b16.a1	jgi|Polbr1|1479303|gm1.2884_g|GH7|Glycoside Hydrolase Family 7 protein|IPR001722|Glycoside hydrolase, family 7|IPR001722|Glycoside hydrolase, family 7|IPR001722|Glycoside hydrolase, family 7|IPR008985|Concanavalin A-like lectin/glucanase|	1	0	0	3	2	9	3
b16	b16.a2	jgi|Polbr1|355477|CE355476_2182|GH7|Glycoside Hydrolase Family 7 protein|IPR001722|Glycoside hydrolase, family 7|IPR001722|Glycoside hydrolase, family 7|IPR001722|Glycoside hydrolase, family 7|IPR008985|Concanavalin A-like lectin/glucanase|	1	0	0	1	1	5	2
b17	b17.a1	jgi|Polbr1|1406746|fgenesh1_kg.47_#_65_#_Locus5032v1rpkm29.17|IPR015366|Peptidase S53, propeptide|IPR000209|Peptidase S8 and S53, subtilisin, kexin, sedolisin|IPR009020|Proteinase inhibitor, propeptide|	1	3	0	3	1	2	1
b17	b17.a2	jgi|Polbr1|1406960|fgenesh1_kg.49_#_51_#_Locus3221v1rpkm50.04|IPR015366|Peptidase S53, propeptide|IPR000209|Peptidase S8 and S53, subtilisin, kexin, sedolisin|IPR009020|Proteinase inhibitor, propeptide|	1	1	2	2	0	1	0
b17	b17.a3	jgi|Polbr1|1100656|CE1100655_42755|IPR000209|Peptidase S8 and S53, subtilisin, kexin, sedolisin|IPR015366|Peptidase S53, propeptide|IPR000209|Peptidase S8 and S53, subtilisin, kexin, sedolisin|IPR009020|Proteinase inhibitor, propeptide|	1	0	0	3	0	2	0
b18	b18.a1	jgi|Polbr1|1490858|gm1.14439_g|IPR001563|Peptidase S10, serine carboxypeptidase|IPR001563|Peptidase S10, serine carboxypeptidase|IPR001563|Peptidase S10, serine carboxypeptidase|IPR001563|Peptidase S10, serine carboxypeptidase|	1	0	0	5	0	4	0
b18	b18.a2	jgi|Polbr1|1339450|e_gw1.5.937.1|IPR001563|Peptidase S10, serine carboxypeptidase|IPR001563|Peptidase S10, serine carboxypeptidase|IPR001563|Peptidase S10, serine carboxypeptidase|	1	1	1	4	0	1	0
b19	b19.a1	jgi|Polbr1|165618|CE165617_2833|IPR001938|Thaumatin, pathogenesis-related|IPR001938|Thaumatin, pathogenesis-related|IPR001938|Thaumatin, pathogenesis-related|IPR001938|Thaumatin, pathogenesis-related|IPR001938|Thaumatin, pathogenesis-related|IPR001938|Thaumatin, pathogenesis-related|	1	0	0	3	3	6	3
b20	b20.a1	jgi|Polbr1|1351752|e_gw1.31.257.1|GH37|Glycoside Hydrolase Family 37 protein|IPR001661|Glycoside hydrolase, family 37|IPR001661|Glycoside hydrolase, family 37|IPR001661|Glycoside hydrolase, family 37|IPR001661|Glycoside hydrolase, family 37|IPR008928|Six-hairpin glycosidase-like|	1	1	1	9	1	2	1
b21	b21.a1	jgi|Polbr1|899854|CE899853_5672|IPR006094|FAD linked oxidase, N-terminal|IPR012951|Berberine/berberine-like|IPR016166|FAD-binding, type 2|	1	2	5	3	2	1	1
b22	b22.a1	jgi|Polbr1|1356067|e_gw1.49.44.1|GH95|Glycoside Hydrolase Family 95 protein|IPR016518|Uncharacterised conserved protein UCP007663|IPR008928|Six-hairpin glycosidase-like|	1	2	3	4	2	2	1
b23	b23.a1	jgi|Polbr1|1427816|estExt_Genewise1Plus.C_3_t20484|GH72-CBM43|Glycoside Hydrolase Family 72 / Carbohydrate-Binding Module Family 43 protein|IPR004886|Glycolipid anchored surface protein GAS1|IPR012946|X8|IPR012946|X8|IPR001547|Glycoside hydrolase, family 5|IPR000595|Cyclic nucleotide-binding|IPR017853|Glycoside hydrolase, catalytic core|	1	4	3	3	2	1	0
b24	b24.a1	jgi|Polbr1|530269|CE530268_2175|	1	0	0	6	1	5	1
b25	b25.a1	jgi|Polbr1|1437352|estExt_Genewise1Plus.C_210386|GH2|Glycoside Hydrolase Family 2 protein|IPR006102|Glycoside hydrolase family 2, immunoglobulin-like beta-sandwich|IPR008979|Galactose-binding like|IPR017853|Glycoside hydrolase, catalytic core|	1	1	1	4	0	2	1
b25	b25.a2	jgi|Polbr1|1437365|estExt_Genewise1Plus.C_210399|GH2|Glycoside Hydrolase Family 2 protein|IPR006102|Glycoside hydrolase family 2, immunoglobulin-like beta-sandwich|IPR008979|Galactose-binding like|IPR017853|Glycoside hydrolase, catalytic core|	1	1	1	5	0	1	1
b26	b26.a1	jgi|Polbr1|775754|CE775753_35734|GH31|Glycoside Hydrolase Family 31 protein|IPR000322|Glycoside hydrolase, family 31|IPR000322|Glycoside hydrolase, family 31|IPR017853|Glycoside hydrolase, catalytic core|	1	0	0	3	1	6	0
b27	b27.a1	jgi|Polbr1|1338011|e_gw1.3.813.1|CE4|Carbohydrate Esterase Family 4 protein|IPR002509|Polysaccharide deacetylase|IPR011330|Glycoside hydrolase/deacetylase, beta/alpha-barrel|	1	0	0	8	0	2	0
b28	b28.a1	jgi|Polbr1|615361|CE615360_11270|GH3|Glycoside Hydrolase Family 3 protein|IPR001764|Glycoside hydrolase, family 3, N-terminal|IPR001764|Glycoside hydrolase, family 3, N-terminal|IPR002772|Glycoside hydrolase, family 3, C-terminal|IPR017853|Glycoside hydrolase, catalytic core|IPR002772|Glycoside hydrolase, family 3, C-terminal|	1	0	0	1	2	3	3
b29	b29.a1	jgi|Polbr1|1337234|e_gw1.3.310.1|PL8_4|Polysaccharide Lyase Family 8 protein|IPR003159|Polysaccharide lyase family 8, central|IPR008929|Chondroitin AC/alginate lyase|IPR011071|Polysaccharide lyase family 8-like, C-terminal|IPR011013|Glycoside hydrolase-type carbohydrate-binding|	1	1	1	2	2	2	1
b30	b30.a1	jgi|Polbr1|1544098|MIX52814_7719_36|IPR001563|Peptidase S10, serine carboxypeptidase|IPR001563|Peptidase S10, serine carboxypeptidase|IPR001563|Peptidase S10, serine carboxypeptidase|IPR001563|Peptidase S10, serine carboxypeptidase|IPR001563|Peptidase S10, serine carboxypeptidase|	1	0	1	3	0	5	0
b31	b31.a1	jgi|Polbr1|1347474|e_gw1.18.442.1|GH5_9|Glycoside Hydrolase Family 5 protein|IPR001547|Glycoside hydrolase, family 5|IPR017853|Glycoside hydrolase, catalytic core|	1	1	0	4	0	4	0
b32	b32.a1	jgi|Polbr1|1487358|gm1.10939_g|GH35|Glycoside Hydrolase Family 35 protein|IPR001944|Glycoside hydrolase, family 35|IPR001944|Glycoside hydrolase, family 35|IPR017853|Glycoside hydrolase, catalytic core|	1	0	0	3	1	3	2
b33	b33.a1	jgi|Polbr1|1348579|e_gw1.20.24.1|AA5_1|Copper radical oxidase|IPR002889|Carbohydrate-binding WSC|IPR009880|Glyoxal oxidase, N-terminal|IPR015202|Region of unknown function DUF1929|IPR013994|Carbohydrate-binding WSC, subgroup|IPR002889|Carbohydrate-binding WSC|IPR011043|Galactose oxidase/kelch, beta-propeller|IPR014756|Immunoglobulin E-set|	1	0	0	5	0	4	0
b34	b34.a1	jgi|Polbr1|1417405|fgenesh1_pg.17_#_102|AA1_1|Laccase|IPR001117|Multicopper oxidase, type 1|IPR011706|Multicopper oxidase, type 2|IPR011707|Multicopper oxidase, type 3|IPR002355|Multicopper oxidase, copper-binding site|IPR002355|Multicopper oxidase, copper-binding site|IPR008972|Cupredoxin|	1	0	0	4	0	4	0
b35	b35.a1	jgi|Polbr1|1362263|e_gw1.100.3.1|AA5_1|Copper radical oxidase|IPR009880|Glyoxal oxidase, N-terminal|IPR015202|Region of unknown function DUF1929|IPR011043|Galactose oxidase/kelch, beta-propeller|IPR014756|Immunoglobulin E-set|	1	0	1	4	1	2	0
b36	b36.a1	jgi|Polbr1|1422305|fgenesh1_pg.98_#_18|IPR002018|Carboxylesterase, type B|IPR002018|Carboxylesterase, type B|	1	0	0	2	1	2	0
b36	b36.a2	jgi|Polbr1|1260852|CE1260851_1225|	1	0	0	3	0	1	0
b36	b36.a3	jgi|Polbr1|1547194|MIX55910_12625_61|IPR002018|Carboxylesterase, type B|IPR002018|Carboxylesterase, type B|	1	0	0	2	0	0	0
b37	b37.a1	jgi|Polbr1|977992|CE977991_41569|	1	0	1	3	0	3	0
b38	b38.a1	jgi|Polbr1|1375508|estExt_Genewise1.C_9_t10102|IPR000639|Epoxide hydrolase-like|IPR000073|Alpha/beta hydrolase fold-1|	1	0	0	5	0	2	0
b39	b39.a1	jgi|Polbr1|1411725|fgenesh1_kg.121_#_26_#_Locus590v1rpkm253.02|IPR015366|Peptidase S53, propeptide|IPR000194|ATPase, F1/V1/A1 complex, alpha/beta subunit, nucleotide-binding|IPR003439|ABC transporter-like|IPR000209|Peptidase S8 and S53, subtilisin, kexin, sedolisin|IPR009020|Proteinase inhibitor, propeptide|	1	0	0	5	0	2	0
b40	b40.a1	jgi|Polbr1|1481521|gm1.5102_g|IPR001563|Peptidase S10, serine carboxypeptidase|IPR001563|Peptidase S10, serine carboxypeptidase|IPR001563|Peptidase S10, serine carboxypeptidase|IPR001563|Peptidase S10, serine carboxypeptidase|	1	0	0	1	2	3	0
b41	b41.a1	jgi|Polbr1|1445296|estExt_Genewise1Plus.C_650102|IPR001155|NADH:flavin oxidoreductase/NADH oxidase, N-terminal|	1	0	0	0	0	3	1
b41	b41.a2	jgi|Polbr1|1392401|estExt_Genewise1.C_1160055|IPR001155|NADH:flavin oxidoreductase/NADH oxidase, N-terminal|	3	0	0	0	0	1	2
b41	b41.a3	jgi|Polbr1|1364322|e_gw1.129.53.1|IPR001155|NADH:flavin oxidoreductase/NADH oxidase, N-terminal|	3	0	0	0	1	1	1
b42	b42.a1	jgi|Polbr1|1354493|e_gw1.42.177.1|IPR002018|Carboxylesterase, type B|IPR002018|Carboxylesterase, type B|IPR002018|Carboxylesterase, type B|	1	0	0	2	1	1	2
b43	b43.a1	jgi|Polbr1|1399901|fgenesh1_kg.11_#_7_#_Locus3398v1rpkm47.19|GH27|Glycoside Hydrolase Family 27 protein|IPR000111|Glycoside hydrolase, clan GH-D|IPR002241|Glycoside hydrolase, family 27|IPR000111|Glycoside hydrolase, clan GH-D|IPR017853|Glycoside hydrolase, catalytic core|	1	0	1	2	1	2	0
b44	b44.a1	jgi|Polbr1|1457484|fgenesh1_pm.56_#_11|GH16|Glycoside Hydrolase Family 16 protein|IPR008985|Concanavalin A-like lectin/glucanase|	1	1	0	2	0	3	0
b45	b45.a1	jgi|Polbr1|1328989|gw1.85.54.1|	1	1	0	2	1	2	0
b46	b46.a1	jgi|Polbr1|1395134|fgenesh1_kg.1_#_494_#_Locus1806v1rpkm89.95|IPR006045|Cupin 1|IPR013096|Cupin 2, conserved barrel|IPR017774|Bicupin, oxalate decarboxylase/oxidase|IPR000276|GPCR, rhodopsin-like|IPR011051|Cupin, RmlC-type|	1	0	0	2	0	4	0
b47	b47.a1	jgi|Polbr1|1434324|estExt_Genewise1Plus.C_130135|IPR002018|Carboxylesterase, type B|IPR002018|Carboxylesterase, type B|	1	0	1	1	1	3	0
b48	b48.a1	jgi|Polbr1|1351053|e_gw1.28.105.1|IPR006045|Cupin 1|IPR013096|Cupin 2, conserved barrel|IPR017774|Bicupin, oxalate decarboxylase/oxidase|IPR011051|Cupin, RmlC-type|	1	0	1	1	1	1	1
b49	b49.a1	jgi|Polbr1|1346223|e_gw1.14.450.1|IPR001384|Peptidase M35, deuterolysin|	1	0	0	0	0	3	2
b50	b50.a1	jgi|Polbr1|1559509|estExt_Genemark1.C_680003|	1	0	0	2	1	2	0
b51	b51.a1	jgi|Polbr1|1460895|estExt_fgenesh1_pm.C_40005|IPR001461|Peptidase A1|IPR001461|Peptidase A1|IPR001969|Peptidase aspartic, active site|IPR009007|Peptidase aspartic, catalytic|	1	0	0	3	0	2	0
b52	b52.a1	jgi|Polbr1|1489360|gm1.12941_g|GH16|Glycoside Hydrolase Family 16 protein|IPR008985|Concanavalin A-like lectin/glucanase|	1	1	0	1	1	1	1
b53	b53.a1	jgi|Polbr1|1144614|CE1144613_73762|IPR015366|Peptidase S53, propeptide|IPR000209|Peptidase S8 and S53, subtilisin, kexin, sedolisin|IPR000209|Peptidase S8 and S53, subtilisin, kexin, sedolisin|IPR009020|Proteinase inhibitor, propeptide|	1	0	0	0	0	5	0
b54	b54.a1	jgi|Polbr1|677637|CE677636_38414|IPR015366|Peptidase S53, propeptide|IPR000209|Peptidase S8 and S53, subtilisin, kexin, sedolisin|IPR000209|Peptidase S8 and S53, subtilisin, kexin, sedolisin|IPR009020|Proteinase inhibitor, propeptide|	1	0	0	2	0	3	0
b55	b55.a1	jgi|Polbr1|1416855|fgenesh1_pg.13_#_122|IPR001461|Peptidase A1|IPR001461|Peptidase A1|IPR001969|Peptidase aspartic, active site|IPR009007|Peptidase aspartic, catalytic|	1	0	1	1	2	1	0
b56	b56.a1	jgi|Polbr1|1339838|e_gw1.5.779.1|CBM1-GH5_7|Carbohydrate-Binding Module Family 1 / Glycoside Hydrolase Family 5 protein|IPR001547|Glycoside hydrolase, family 5|IPR000254|Cellulose-binding region, fungal|IPR000254|Cellulose-binding region, fungal|IPR000254|Cellulose-binding region, fungal|IPR000254|Cellulose-binding region, fungal|IPR001547|Glycoside hydrolase, family 5|IPR017853|Glycoside hydrola…	1	0	0	3	0	2	0
b57	b57.a1	jgi|Polbr1|1478222|gm1.1803_g|IPR001929|Germin|IPR006045|Cupin 1|IPR001929|Germin|IPR011051|Cupin, RmlC-type|	1	0	0	1	1	2	0
b58	b58.a1	jgi|Polbr1|1399130|fgenesh1_kg.8_#_433_#_Locus7121v1rpkm15.40|GH71|Glycoside Hydrolase Family 71 protein|IPR005197|Glycoside hydrolase, family 71|IPR005197|Glycoside hydrolase, family 71|	1	0	0	2	2	0	0
b59	b59.a1	jgi|Polbr1|1534843|MIX43559_7181_87|	1	0	0	2	0	1	1
b60	b60.a1	jgi|Polbr1|835216|CE835215_1786|CE8|Carbohydrate Esterase Family 8 protein|IPR000070|Pectinesterase, catalytic|IPR011050|Pectin lyase fold/virulence factor|	1	0	0	2	0	2	0
b61	b61.a1	jgi|Polbr1|1362054|e_gw1.97.19.1|IPR002018|Carboxylesterase, type B|IPR002018|Carboxylesterase, type B|	1	0	0	0	1	1	2
b62	b62.a1	jgi|Polbr1|1352774|e_gw1.35.11.1|IPR012878|Protein of unknown function DUF1680|	1	0	0	2	0	2	0
b63	b63.a1	jgi|Polbr1|1397005|fgenesh1_kg.4_#_331_#_Locus253v1rpkm562.78|IPR001461|Peptidase A1|IPR001461|Peptidase A1|IPR001969|Peptidase aspartic, active site|IPR009007|Peptidase aspartic, catalytic|	1	0	0	0	2	2	0
b64	b64.a1	jgi|Polbr1|397425|CE397424_1271|GH93|Glycoside Hydrolase Family 93 protein|IPR002860|BNR repeat|IPR011040|Neuraminidase|	1	0	0	2	1	0	1
b65	b65.a1	jgi|Polbr1|1478588|gm1.2169_g|IPR001461|Peptidase A1|IPR001461|Peptidase A1|IPR001969|Peptidase aspartic, active site|IPR001220|Legume lectin, beta domain|IPR009007|Peptidase aspartic, catalytic|	1	0	0	2	0	2	0
b66	b66.a1	jgi|Polbr1|1419879|fgenesh1_pg.44_#_51|IPR013149|Alcohol dehydrogenase, zinc-binding|IPR013154|Alcohol dehydrogenase GroES-like|IPR002328|Alcohol dehydrogenase, zinc-containing, conserved site|IPR011032|GroES-like|IPR016040|NAD(P)-binding|	1	0	0	0	0	3	1
b67	b67.a1	jgi|Polbr1|1413263|fgenesh1_kg.230_#_2_#_Locus2088v1rpkm78.33|IPR005135|Endonuclease/exonuclease/phosphatase|IPR005135|Endonuclease/exonuclease/phosphatase|	1	0	0	0	1	3	0
b68	b68.a1	jgi|Polbr1|1400420|fgenesh1_kg.12_#_246_#_Locus1381v1rpkm115.15|IPR007312|Phosphoesterase|	1	0	0	3	0	1	0
b69	b69.a1	jgi|Polbr1|1495871|MIX4587_10656_36|GH30_3|Glycoside Hydrolase Family 30 protein|IPR001139|Glycoside hydrolase, family 30|IPR008972|Cupredoxin|IPR017853|Glycoside hydrolase, catalytic core|	1	0	0	2	0	2	0
b70	b70.a1	jgi|Polbr1|1456450|fgenesh1_pm.35_#_72|GH18|Glycoside Hydrolase Family 18 protein|IPR001579|Glycoside hydrolase, chitinase active site|IPR017853|Glycoside hydrolase, catalytic core|	3	0	0	4	0	0	0
b71	b71.a1	jgi|Polbr1|497798|CE497797_2765|IPR005135|Endonuclease/exonuclease/phosphatase|IPR005135|Endonuclease/exonuclease/phosphatase|	1	0	0	2	0	2	0
b72	b72.a1	jgi|Polbr1|1357935|e_gw1.60.61.1|IPR001842|Peptidase M36, fungalysin|IPR001842|Peptidase M36, fungalysin|IPR011096|Propeptide, peptidase M4 and M36|IPR001425|Rhodopsin, bacterial|	1	0	0	0	1	0	2
b73	b73.a1	jgi|Polbr1|1338413|e_gw1.3.932.1|GH16|Glycoside Hydrolase Family 16 protein|IPR008985|Concanavalin A-like lectin/glucanase|	1	0	0	0	1	0	2
b74	b74.a1	jgi|Polbr1|876558|CE876557_2868|IPR013595|Peptidase S33, tripeptidyl-peptidase C-terminal|	1	0	0	1	1	1	0
b75	b75.a1	jgi|Polbr1|1455149|fgenesh1_pm.19_#_39|AA3_2|GMC oxidoreductase|IPR000172|Glucose-methanol-choline oxidoreductase, N-terminal|IPR007867|Glucose-methanol-choline oxidoreductase, C-terminal|IPR012132|Glucose-methanol-choline oxidoreductase|IPR000172|Glucose-methanol-choline oxidoreductase, N-terminal|IPR000172|Glucose-methanol-choline oxidoreductase, N-terminal|	1	0	0	0	0	2	1
b76	b76.a1	jgi|Polbr1|1408780|fgenesh1_kg.68_#_35_#_Locus186v2rpkm20.25_PRE|IPR004000|Actin/actin-like|IPR004000|Actin/actin-like|IPR004000|Actin/actin-like|IPR004001|Actin, conserved site|IPR004001|Actin, conserved site|IPR004000|Actin/actin-like|	1	0	0	0	0	3	0
b77	b77.a1	jgi|Polbr1|1406302|fgenesh1_kg.43_#_75_#_Locus7665v1rpkm12.61|IPR002018|Carboxylesterase, type B|IPR002018|Carboxylesterase, type B|	1	0	0	2	0	1	0
b78	b78.a1	jgi|Polbr1|1520904|MIX29620_1664_43|GH3|Glycoside Hydrolase Family 3 protein|IPR001764|Glycoside hydrolase, family 3, N-terminal|IPR001764|Glycoside hydrolase, family 3, N-terminal|IPR002772|Glycoside hydrolase, family 3, C-terminal|IPR017853|Glycoside hydrolase, catalytic core|IPR002772|Glycoside hydrolase, family 3, C-terminal|	1	0	0	1	0	2	0
b79	b79.a1	jgi|Polbr1|1480152|gm1.3733_g|GH125|Glycoside Hydrolase Family 125 protein|IPR008313|Uncharacterised conserved protein UCP028846|IPR008313|Uncharacterised conserved protein UCP028846|IPR008928|Six-hairpin glycosidase-like|	1	0	0	0	0	2	0
b80	b80.a1	jgi|Polbr1|1455782|fgenesh1_pm.25_#_20|IPR017853|Glycoside hydrolase, catalytic core|	1	0	0	0	0	2	0
b81	b81.a1	jgi|Polbr1|1353832|e_gw1.39.191.1|GH16|Glycoside Hydrolase Family 16 protein|IPR008985|Concanavalin A-like lectin/glucanase|	1	0	0	0	1	1	0
b82	b82.a1	jgi|Polbr1|1345138|e_gw1.12.122.1|IPR000120|Amidase signature enzyme|IPR000120|Amidase signature enzyme|	1	0	0	0	0	2	0
b83	b83.a1	jgi|Polbr1|1364243|e_gw1.128.52.1|AA8-AA3_1|Iron reductase domain / Cellobiose dehydrogenase|IPR007867|Glucose-methanol-choline oxidoreductase, C-terminal|IPR013027|FAD-dependent pyridine nucleotide-disulphide oxidoreductase|IPR000172|Glucose-methanol-choline oxidoreductase, N-terminal|IPR000172|Glucose-methanol-choline oxidoreductase, N-terminal|IPR008960|Carbohydrate-binding family 9/cellobiose…	1	0	0	0	1	1	0
b84	b84.a1	jgi|Polbr1|1488342|gm1.11923_g|IPR002018|Carboxylesterase, type B|IPR002018|Carboxylesterase, type B|	1	0	0	0	1	0	1
b85	b85.a1	jgi|Polbr1|1489872|gm1.13453_g|IPR002018|Carboxylesterase, type B|IPR002018|Carboxylesterase, type B|IPR002018|Carboxylesterase, type B|	1	0	1	1	0	0	0
b86	b86.a1	jgi|Polbr1|1346902|e_gw1.16.37.1|IPR008758|Peptidase S28|	1	0	0	2	0	0	0
b87	b87.a1	jgi|Polbr1|1346052|e_gw1.14.120.1|IPR002018|Carboxylesterase, type B|IPR002018|Carboxylesterase, type B|IPR002018|Carboxylesterase, type B|	1	0	0	0	0	1	1
b88	b88.a1	jgi|Polbr1|1400708|fgenesh1_kg.13_#_253_#_Locus10676v1rpkm3.50|IPR001563|Peptidase S10, serine carboxypeptidase|IPR001563|Peptidase S10, serine carboxypeptidase|IPR001563|Peptidase S10, serine carboxypeptidase|IPR001563|Peptidase S10, serine carboxypeptidase|	1	1	0	1	0	0	0
b89	b89.a1	jgi|Polbr1|1557562|estExt_Genemark1.C_380050|AA5_1|Copper radical oxidase|IPR009880|Glyoxal oxidase, N-terminal|IPR015202|Region of unknown function DUF1929|IPR011043|Galactose oxidase/kelch, beta-propeller|IPR014756|Immunoglobulin E-set|	1	0	0	0	0	2	0
b90	b90.a1	jgi|Polbr1|1352206|e_gw1.33.115.1|GH79|Glycoside Hydrolase Family 79 protein|	1	0	0	0	0	2	0
b91	b91.a1	jgi|Polbr1|357274|CE357273_5452|AA1_1|Laccase|IPR001117|Multicopper oxidase, type 1|IPR011706|Multicopper oxidase, type 2|IPR011707|Multicopper oxidase, type 3|IPR002355|Multicopper oxidase, copper-binding site|IPR008972|Cupredoxin|	1	0	0	2	0	0	0

## Sheet: Compare PAI Pbr985 Q-Exa
Proteomics complementary data for Pbr985. Protein Abundance Index (PAI) in each condition (Maltose + Lignin and Lignin) at days 7 and 14 following the Q-Exactive analysis methods.
				Day3_Maltose+Lignin	Day3_Lignin	Day7_Maltose+Lignin	Day7_Lignin	Day14_Maltose+Lignin	Day14_Lignin
Group ID	Sub-group ID	Protein Description	Number of proteins	PAI
a1	a1.a1	jgi|Polbr1|224137|CE224136_76555|AA1_1|Laccase|IPR001117|Multicopper oxidase. type 1|IPR011706|Multicopper oxidase. type 2|IPR011707|Multicopper oxidase. type 3|IPR002355|Multicopper oxidase. copper-binding site|IPR008972|Cupredoxin|	1			3.3	0.2	2.4	0.3
a1	a1.a2	jgi|Polbr1|657909|CE657908_4567|AA1_1|Laccase|IPR001117|Multicopper oxidase. type 1|IPR011706|Multicopper oxidase. type 2|IPR011707|Multicopper oxidase. type 3|IPR002355|Multicopper oxidase. copper-binding site|IPR008972|Cupredoxin|	1	0.166666666666667	0.166666666666667	2.16666666666667		1.16666666666667
a1	a1.a3	jgi|Polbr1|435106|CE435105_4217|AA1_1|Laccase|IPR001117|Multicopper oxidase. type 1|IPR011706|Multicopper oxidase. type 2|IPR011707|Multicopper oxidase. type 3|IPR002355|Multicopper oxidase. copper-binding site|IPR008972|Cupredoxin|	1			1.2		1
a2	a2.a1	jgi|Polbr1|1388977|estExt_Genewise1.C_680026|AA7|Glucooligosaccharide oxidase|IPR006094|FAD linked oxidase. N-terminal|IPR012951|Berberine/berberine-like|IPR016166|FAD-binding. type 2|	1	0.1	0.3	2.4	0.5	1.7	0.6
a3	a3.a1	jgi|Polbr1|1407721|fgenesh1_kg.56_#_34_#_Locus1356v1rpkm116.62|GH76|Glycoside Hydrolase Family 76 protein|IPR005198|Glycoside hydrolase. family 76|IPR008928|Six-hairpin glycosidase-like|	1			1.375	1	0.75	0.125
a4	a4.a1	jgi|Polbr1|1500721|MIX9437_110063_81|GH92|Glycoside Hydrolase Family 92 protein|IPR012939|Glycosyl hydrolase 92|IPR005887|Alpha-1.2-mannosidase. putative|IPR008928|Six-hairpin glycosidase-like|	1		0.0476190476190476	1		0.904761904761905	0.142857142857143
a4	a4.a2	jgi|Polbr1|1400602|fgenesh1_kg.13_#_147_#_Locus1500v1rpkm106.56|GH92|Glycoside Hydrolase Family 92 protein|IPR012939|Glycosyl hydrolase 92|IPR008928|Six-hairpin glycosidase-like|IPR016040|NAD(P)-binding|	1			0.173913043478261		0.173913043478261
a5	a5.a1	jgi|Polbr1|1347831|e_gw1.18.256.1|	1	0.333333333333333	0.583333333333333	1	0.333333333333333	0.583333333333333	0.166666666666667
a5	a5.a2	jgi|Polbr1|346399|CE346398_94425|	1	0.25	0.3	0.4	0.25	0.35	0.2
a6	a6.a1	jgi|Polbr1|1349191|e_gw1.22.85.1|GH15-CBM20|Glycoside Hydrolase Family 15 / Carbohydrate-Binding Module Family 20 protein|IPR002044|Glycoside hydrolase. carbohydrate-binding|IPR000165|Glycoside hydrolase. family 15|IPR002044|Glycoside hydrolase. carbohydrate-binding|IPR011613|Glycoside hydrolase 15-related|IPR008291|Glucan 1.4-alpha-glucosidase. starch-binding|IPR002044|Glycoside hydrolase. carbo…	1		0.2	1.9	0.3	1.4	0.1
a7	a7.a1	jgi|Polbr1|748989|CE748988_52067|IPR014870|Region of unknown function DUF1793|IPR008928|Six-hairpin glycosidase-like|	1		0.111111111111111	0.444444444444444	0.444444444444444	0.388888888888889	0.222222222222222
a8	a8.a1	jgi|Polbr1|1408208|fgenesh1_kg.61_#_22_#_Locus7163v1rpkm15.19|IPR000868|Isochorismatase hydrolase|IPR000868|Isochorismatase hydrolase|	1		0.3	1.4	0.2	1.3	0.1
a9	a9.a1	jgi|Polbr1|1488971|gm1.12552_g|GH55|Glycoside Hydrolase Family 55 protein|IPR011050|Pectin lyase fold/virulence factor|	1		0.0769230769230769	1.23076923076923	0.0769230769230769	1
b10	b10.a1	jgi|Polbr1|1401868|fgenesh1_kg.18_#_119_#_Locus174v1rpkm732.12|	1	0.0833333333333333	0.25	0.5	0.416666666666667	0.666666666666667	0.25
b11	b11.a1	jgi|Polbr1|1420175|fgenesh1_pg.49_#_18|AA5_1|Copper radical oxidase|IPR009880|Glyoxal oxidase. N-terminal|IPR015202|Region of unknown function DUF1929|IPR011043|Galactose oxidase/kelch. beta-propeller|IPR014756|Immunoglobulin E-set|	1	0.0833333333333333	0.166666666666667	1	0.166666666666667	0.75	0.166666666666667
b12	b12.a1	jgi|Polbr1|1338184|e_gw1.3.371.1|GH27|Glycoside Hydrolase Family 27 protein|IPR000111|Glycoside hydrolase. clan GH-D|IPR002241|Glycoside hydrolase. family 27|IPR000111|Glycoside hydrolase. clan GH-D|IPR000111|Glycoside hydrolase. clan GH-D|IPR017853|Glycoside hydrolase. catalytic core|	1		0.125	0.5625	0.125	0.4375
b13	b13.a1	jgi|Polbr1|1364383|e_gw1.130.38.1|IPR001461|Peptidase A1|IPR001461|Peptidase A1|IPR001969|Peptidase aspartic. active site|IPR009007|Peptidase aspartic. catalytic|	1			0.666666666666667	0.666666666666667	0.833333333333333	0.5
b14	b14.a1	jgi|Polbr1|1447784|estExt_Genewise1Plus.C_970077|GH28|Glycoside Hydrolase Family 28 protein|IPR000743|Glycoside hydrolase. family 28|IPR006626|Parallel beta-helix repeat|IPR000743|Glycoside hydrolase. family 28|IPR011050|Pectin lyase fold/virulence factor|	1			0.416666666666667	0.166666666666667	0.583333333333333	0.0833333333333333
b15	b15.a1	jgi|Polbr1|1400569|fgenesh1_kg.13_#_114_#_Locus4315v3rpkm0.36_PRE|IPR002018|Carboxylesterase. type B|IPR002018|Carboxylesterase. type B|	1			0.846153846153846		0.615384615384615
b16	b16.a1	jgi|Polbr1|1479303|gm1.2884_g|GH7|Glycoside Hydrolase Family 7 protein|IPR001722|Glycoside hydrolase. family 7|IPR001722|Glycoside hydrolase. family 7|IPR001722|Glycoside hydrolase. family 7|IPR008985|Concanavalin A-like lectin/glucanase|	1			0.142857142857143	0.142857142857143	0.357142857142857	0.214285714285714
b16	b16.a2	jgi|Polbr1|355477|CE355476_2182|GH7|Glycoside Hydrolase Family 7 protein|IPR001722|Glycoside hydrolase. family 7|IPR001722|Glycoside hydrolase. family 7|IPR001722|Glycoside hydrolase. family 7|IPR008985|Concanavalin A-like lectin/glucanase|	1			0.05	0.05	0.2	0.1
b17	b17.a1	jgi|Polbr1|1406746|fgenesh1_kg.47_#_65_#_Locus5032v1rpkm29.17|IPR015366|Peptidase S53. propeptide|IPR000209|Peptidase S8 and S53. subtilisin. kexin. sedolisin|IPR009020|Proteinase inhibitor. propeptide|	1	0.1875		0.1875	0.0625	0.125	0.0625
b17	b17.a2	jgi|Polbr1|1406960|fgenesh1_kg.49_#_51_#_Locus3221v1rpkm50.04|IPR015366|Peptidase S53. propeptide|IPR000209|Peptidase S8 and S53. subtilisin. kexin. sedolisin|IPR009020|Proteinase inhibitor. propeptide|	1	0.0588235294117647	0.117647058823529	0.117647058823529		0.0588235294117647
b17	b17.a3	jgi|Polbr1|1100656|CE1100655_42755|IPR000209|Peptidase S8 and S53. subtilisin. kexin. sedolisin|IPR015366|Peptidase S53. propeptide|IPR000209|Peptidase S8 and S53. subtilisin. kexin. sedolisin|IPR009020|Proteinase inhibitor. propeptide|	1			0.375		0.25
b18	b18.a1	jgi|Polbr1|1490858|gm1.14439_g|IPR001563|Peptidase S10. serine carboxypeptidase|IPR001563|Peptidase S10. serine carboxypeptidase|IPR001563|Peptidase S10. serine carboxypeptidase|IPR001563|Peptidase S10. serine carboxypeptidase|	1			0.5		0.375
b18	b18.a2	jgi|Polbr1|1339450|e_gw1.5.937.1|IPR001563|Peptidase S10. serine carboxypeptidase|IPR001563|Peptidase S10. serine carboxypeptidase|IPR001563|Peptidase S10. serine carboxypeptidase|	1	0.111111111111111	0.111111111111111	0.444444444444444		0.111111111111111
b19	b19.a1	jgi|Polbr1|165618|CE165617_2833|IPR001938|Thaumatin. pathogenesis-related|IPR001938|Thaumatin. pathogenesis-related|IPR001938|Thaumatin. pathogenesis-related|IPR001938|Thaumatin. pathogenesis-related|IPR001938|Thaumatin. pathogenesis-related|IPR001938|Thaumatin. pathogenesis-related|	1			0.75	0.75	1.25	0.75
b20	b20.a1	jgi|Polbr1|1351752|e_gw1.31.257.1|GH37|Glycoside Hydrolase Family 37 protein|IPR001661|Glycoside hydrolase. family 37|IPR001661|Glycoside hydrolase. family 37|IPR001661|Glycoside hydrolase. family 37|IPR001661|Glycoside hydrolase. family 37|IPR008928|Six-hairpin glycosidase-like|	1	0.0416666666666667	0.0416666666666667	0.375	0.0416666666666667	0.0833333333333333	0.0416666666666667
b21	b21.a1	jgi|Polbr1|899854|CE899853_5672|IPR006094|FAD linked oxidase. N-terminal|IPR012951|Berberine/berberine-like|IPR016166|FAD-binding. type 2|	1	0.125	0.25	0.1875	0.125	0.0625	0.0625
b22	b22.a1	jgi|Polbr1|1356067|e_gw1.49.44.1|GH95|Glycoside Hydrolase Family 95 protein|IPR016518|Uncharacterised conserved protein UCP007663|IPR008928|Six-hairpin glycosidase-like|	1	0.117647058823529	0.117647058823529	0.235294117647059	0.117647058823529	0.117647058823529	0.0588235294117647
b23	b23.a1	jgi|Polbr1|1427816|estExt_Genewise1Plus.C_3_t20484|GH72-CBM43|Glycoside Hydrolase Family 72 / Carbohydrate-Binding Module Family 43 protein|IPR004886|Glycolipid anchored surface protein GAS1|IPR012946|X8|IPR012946|X8|IPR001547|Glycoside hydrolase. family 5|IPR000595|Cyclic nucleotide-binding|IPR017853|Glycoside hydrolase. catalytic core|	1	0.333333333333333	0.166666666666667	0.25	0.166666666666667	0.0833333333333333
b24	b24.a1	jgi|Polbr1|530269|CE530268_2175|	1			0.193548387096774	0.032258064516129	0.161290322580645	0.032258064516129
b25	b25.a1	jgi|Polbr1|1437352|estExt_Genewise1Plus.C_210386|GH2|Glycoside Hydrolase Family 2 protein|IPR006102|Glycoside hydrolase family 2. immunoglobulin-like beta-sandwich|IPR008979|Galactose-binding like|IPR017853|Glycoside hydrolase. catalytic core|	1	0.0588235294117647	0.0588235294117647	0.235294117647059		0.117647058823529	0.0588235294117647
b25	b25.a2	jgi|Polbr1|1437365|estExt_Genewise1Plus.C_210399|GH2|Glycoside Hydrolase Family 2 protein|IPR006102|Glycoside hydrolase family 2. immunoglobulin-like beta-sandwich|IPR008979|Galactose-binding like|IPR017853|Glycoside hydrolase. catalytic core|	1	0.0526315789473684	0.0526315789473684	0.263157894736842		0.0526315789473684	0.0526315789473684
b26	b26.a1	jgi|Polbr1|775754|CE775753_35734|GH31|Glycoside Hydrolase Family 31 protein|IPR000322|Glycoside hydrolase. family 31|IPR000322|Glycoside hydrolase. family 31|IPR017853|Glycoside hydrolase. catalytic core|	1			0.0645161290322581	0.032258064516129	0.129032258064516
b27	b27.a1	jgi|Polbr1|1338011|e_gw1.3.813.1|CE4|Carbohydrate Esterase Family 4 protein|IPR002509|Polysaccharide deacetylase|IPR011330|Glycoside hydrolase/deacetylase. beta/alpha-barrel|	1			0.333333333333333		0.222222222222222
b28	b28.a1	jgi|Polbr1|615361|CE615360_11270|GH3|Glycoside Hydrolase Family 3 protein|IPR001764|Glycoside hydrolase. family 3. N-terminal|IPR001764|Glycoside hydrolase. family 3. N-terminal|IPR002772|Glycoside hydrolase. family 3. C-terminal|IPR017853|Glycoside hydrolase. catalytic core|IPR002772|Glycoside hydrolase. family 3. C-terminal|	1			0.037037037037037	0.0740740740740741	0.111111111111111	0.111111111111111
b29	b29.a1	jgi|Polbr1|1337234|e_gw1.3.310.1|PL8_4|Polysaccharide Lyase Family 8 protein|IPR003159|Polysaccharide lyase family 8. central|IPR008929|Chondroitin AC/alginate lyase|IPR011071|Polysaccharide lyase family 8-like. C-terminal|IPR011013|Glycoside hydrolase-type carbohydrate-binding|	1	0.0526315789473684	0.0526315789473684	0.105263157894737	0.105263157894737	0.105263157894737	0.0526315789473684
b30	b30.a1	jgi|Polbr1|1544098|MIX52814_7719_36|IPR001563|Peptidase S10. serine carboxypeptidase|IPR001563|Peptidase S10. serine carboxypeptidase|IPR001563|Peptidase S10. serine carboxypeptidase|IPR001563|Peptidase S10. serine carboxypeptidase|IPR001563|Peptidase S10. serine carboxypeptidase|	1		0.0588235294117647	0.117647058823529		0.176470588235294
b31	b31.a1	jgi|Polbr1|1347474|e_gw1.18.442.1|GH5_9|Glycoside Hydrolase Family 5 protein|IPR001547|Glycoside hydrolase. family 5|IPR017853|Glycoside hydrolase. catalytic core|	1	0.1		0.3		0.4
b32	b32.a1	jgi|Polbr1|1487358|gm1.10939_g|GH35|Glycoside Hydrolase Family 35 protein|IPR001944|Glycoside hydrolase. family 35|IPR001944|Glycoside hydrolase. family 35|IPR017853|Glycoside hydrolase. catalytic core|	1			0.125	0.0416666666666667	0.125	0.0833333333333333
b33	b33.a1	jgi|Polbr1|1348579|e_gw1.20.24.1|AA5_1|Copper radical oxidase|IPR002889|Carbohydrate-binding WSC|IPR009880|Glyoxal oxidase. N-terminal|IPR015202|Region of unknown function DUF1929|IPR013994|Carbohydrate-binding WSC. subgroup|IPR002889|Carbohydrate-binding WSC|IPR011043|Galactose oxidase/kelch. beta-propeller|IPR014756|Immunoglobulin E-set|	1			0.2		0.1
b34	b34.a1	jgi|Polbr1|1417405|fgenesh1_pg.17_#_102|AA1_1|Laccase|IPR001117|Multicopper oxidase. type 1|IPR011706|Multicopper oxidase. type 2|IPR011707|Multicopper oxidase. type 3|IPR002355|Multicopper oxidase. copper-binding site|IPR002355|Multicopper oxidase. copper-binding site|IPR008972|Cupredoxin|	1			0.5		0.5
b35	b35.a1	jgi|Polbr1|1362263|e_gw1.100.3.1|AA5_1|Copper radical oxidase|IPR009880|Glyoxal oxidase. N-terminal|IPR015202|Region of unknown function DUF1929|IPR011043|Galactose oxidase/kelch. beta-propeller|IPR014756|Immunoglobulin E-set|	1		0.0666666666666667	0.266666666666667	0.0666666666666667	0.133333333333333
b36	b36.a1	jgi|Polbr1|1422305|fgenesh1_pg.98_#_18|IPR002018|Carboxylesterase. type B|IPR002018|Carboxylesterase. type B|	1			0.117647058823529	0.0588235294117647	0.117647058823529
b36	b36.a2	jgi|Polbr1|1260852|CE1260851_1225|	1			0.428571428571429		0.142857142857143
b36	b36.a3	jgi|Polbr1|1547194|MIX55910_12625_61|IPR002018|Carboxylesterase. type B|IPR002018|Carboxylesterase. type B|	1			0.153846153846154
b37	b37.a1	jgi|Polbr1|977992|CE977991_41569|	1		0.2	0.4		0.4
b38	b38.a1	jgi|Polbr1|1375508|estExt_Genewise1.C_9_t10102|IPR000639|Epoxide hydrolase-like|IPR000073|Alpha/beta hydrolase fold-1|	1			0.357142857142857		0.142857142857143
b39	b39.a1	jgi|Polbr1|1411725|fgenesh1_kg.121_#_26_#_Locus590v1rpkm253.02|IPR015366|Peptidase S53. propeptide|IPR000194|ATPase. F1/V1/A1 complex. alpha/beta subunit. nucleotide-binding|IPR003439|ABC transporter-like|IPR000209|Peptidase S8 and S53. subtilisin. kexin. sedolisin|IPR009020|Proteinase inhibitor. propeptide|	1			0.4		0.2
b40	b40.a1	jgi|Polbr1|1481521|gm1.5102_g|IPR001563|Peptidase S10. serine carboxypeptidase|IPR001563|Peptidase S10. serine carboxypeptidase|IPR001563|Peptidase S10. serine carboxypeptidase|IPR001563|Peptidase S10. serine carboxypeptidase|	1			0.0769230769230769	0.153846153846154	0.230769230769231
b41	b41.a1	jgi|Polbr1|1445296|estExt_Genewise1Plus.C_650102|IPR001155|NADH:flavin oxidoreductase/NADH oxidase. N-terminal|	1					0.176470588235294	0.0588235294117647
b41	b41.a2	jgi|Polbr1|1392401|estExt_Genewise1.C_1160055|IPR001155|NADH:flavin oxidoreductase/NADH oxidase. N-terminal|	3					0.0666666666666667	0.133333333333333
b41	b41.a3	jgi|Polbr1|1364322|e_gw1.129.53.1|IPR001155|NADH:flavin oxidoreductase/NADH oxidase. N-terminal|	3				0.0769230769230769	0.0769230769230769	0.0769230769230769
b42	b42.a1	jgi|Polbr1|1354493|e_gw1.42.177.1|IPR002018|Carboxylesterase. type B|IPR002018|Carboxylesterase. type B|IPR002018|Carboxylesterase. type B|	1			0.0740740740740741	0.037037037037037	0.037037037037037	0.0740740740740741
b43	b43.a1	jgi|Polbr1|1399901|fgenesh1_kg.11_#_7_#_Locus3398v1rpkm47.19|GH27|Glycoside Hydrolase Family 27 protein|IPR000111|Glycoside hydrolase. clan GH-D|IPR002241|Glycoside hydrolase. family 27|IPR000111|Glycoside hydrolase. clan GH-D|IPR017853|Glycoside hydrolase. catalytic core|	1		0.0588235294117647	0.117647058823529	0.0588235294117647	0.117647058823529
b44	b44.a1	jgi|Polbr1|1457484|fgenesh1_pm.56_#_11|GH16|Glycoside Hydrolase Family 16 protein|IPR008985|Concanavalin A-like lectin/glucanase|	1	0.333333333333333		0.666666666666667		1
b45	b45.a1	jgi|Polbr1|1328989|gw1.85.54.1|	1	0.111111111111111		0.222222222222222	0.111111111111111	0.222222222222222
b46	b46.a1	jgi|Polbr1|1395134|fgenesh1_kg.1_#_494_#_Locus1806v1rpkm89.95|IPR006045|Cupin 1|IPR013096|Cupin 2. conserved barrel|IPR017774|Bicupin. oxalate decarboxylase/oxidase|IPR000276|GPCR. rhodopsin-like|IPR011051|Cupin. RmlC-type|	1			0.153846153846154		0.230769230769231
b47	b47.a1	jgi|Polbr1|1434324|estExt_Genewise1Plus.C_130135|IPR002018|Carboxylesterase. type B|IPR002018|Carboxylesterase. type B|	1		0.0625	0.0625	0.0625	0.1875
b48	b48.a1	jgi|Polbr1|1351053|e_gw1.28.105.1|IPR006045|Cupin 1|IPR013096|Cupin 2. conserved barrel|IPR017774|Bicupin. oxalate decarboxylase/oxidase|IPR011051|Cupin. RmlC-type|	1		0.0833333333333333	0.0833333333333333	0.0833333333333333	0.0833333333333333	0.0833333333333333
b49	b49.a1	jgi|Polbr1|1346223|e_gw1.14.450.1|IPR001384|Peptidase M35. deuterolysin|	1					0.3	0.2
b50	b50.a1	jgi|Polbr1|1559509|estExt_Genemark1.C_680003|	1			0.166666666666667	0.0833333333333333	0.166666666666667
b51	b51.a1	jgi|Polbr1|1460895|estExt_fgenesh1_pm.C_40005|IPR001461|Peptidase A1|IPR001461|Peptidase A1|IPR001969|Peptidase aspartic. active site|IPR009007|Peptidase aspartic. catalytic|	1			0.272727272727273		0.181818181818182
b52	b52.a1	jgi|Polbr1|1489360|gm1.12941_g|GH16|Glycoside Hydrolase Family 16 protein|IPR008985|Concanavalin A-like lectin/glucanase|	1	0.25		0.25	0.25	0.25	0.25
b53	b53.a1	jgi|Polbr1|1144614|CE1144613_73762|IPR015366|Peptidase S53. propeptide|IPR000209|Peptidase S8 and S53. subtilisin. kexin. sedolisin|IPR000209|Peptidase S8 and S53. subtilisin. kexin. sedolisin|IPR009020|Proteinase inhibitor. propeptide|	1					0.294117647058824
b54	b54.a1	jgi|Polbr1|677637|CE677636_38414|IPR015366|Peptidase S53. propeptide|IPR000209|Peptidase S8 and S53. subtilisin. kexin. sedolisin|IPR000209|Peptidase S8 and S53. subtilisin. kexin. sedolisin|IPR009020|Proteinase inhibitor. propeptide|	1			0.117647058823529		0.176470588235294
b55	b55.a1	jgi|Polbr1|1416855|fgenesh1_pg.13_#_122|IPR001461|Peptidase A1|IPR001461|Peptidase A1|IPR001969|Peptidase aspartic. active site|IPR009007|Peptidase aspartic. catalytic|	1		0.2	0.2	0.4	0.2
b56	b56.a1	jgi|Polbr1|1339838|e_gw1.5.779.1|CBM1-GH5_7|Carbohydrate-Binding Module Family 1 / Glycoside Hydrolase Family 5 protein|IPR001547|Glycoside hydrolase. family 5|IPR000254|Cellulose-binding region. fungal|IPR000254|Cellulose-binding region. fungal|IPR000254|Cellulose-binding region. fungal|IPR000254|Cellulose-binding region. fungal|IPR001547|Glycoside hydrolase. family 5|IPR017853|Glycoside hydrola…	1			0.5		0.333333333333333
b57	b57.a1	jgi|Polbr1|1478222|gm1.1803_g|IPR001929|Germin|IPR006045|Cupin 1|IPR001929|Germin|IPR011051|Cupin. RmlC-type|	1			0.166666666666667	0.166666666666667	0.333333333333333
b58	b58.a1	jgi|Polbr1|1399130|fgenesh1_kg.8_#_433_#_Locus7121v1rpkm15.40|GH71|Glycoside Hydrolase Family 71 protein|IPR005197|Glycoside hydrolase. family 71|IPR005197|Glycoside hydrolase. family 71|	1			0.166666666666667	0.166666666666667
b59	b59.a1	jgi|Polbr1|1534843|MIX43559_7181_87|	1			0.285714285714286		0.142857142857143	0.142857142857143
b60	b60.a1	jgi|Polbr1|835216|CE835215_1786|CE8|Carbohydrate Esterase Family 8 protein|IPR000070|Pectinesterase. catalytic|IPR011050|Pectin lyase fold/virulence factor|	1			0.142857142857143		0.142857142857143
b61	b61.a1	jgi|Polbr1|1362054|e_gw1.97.19.1|IPR002018|Carboxylesterase. type B|IPR002018|Carboxylesterase. type B|	1				0.0588235294117647	0.0588235294117647	0.117647058823529
b62	b62.a1	jgi|Polbr1|1352774|e_gw1.35.11.1|IPR012878|Protein of unknown function DUF1680|	1			0.0909090909090909		0.0909090909090909
b63	b63.a1	jgi|Polbr1|1397005|fgenesh1_kg.4_#_331_#_Locus253v1rpkm562.78|IPR001461|Peptidase A1|IPR001461|Peptidase A1|IPR001969|Peptidase aspartic. active site|IPR009007|Peptidase aspartic. catalytic|	1				0.142857142857143	0.142857142857143
b64	b64.a1	jgi|Polbr1|397425|CE397424_1271|GH93|Glycoside Hydrolase Family 93 protein|IPR002860|BNR repeat|IPR011040|Neuraminidase|	1			0.181818181818182	0.0909090909090909		0.0909090909090909
b65	b65.a1	jgi|Polbr1|1478588|gm1.2169_g|IPR001461|Peptidase A1|IPR001461|Peptidase A1|IPR001969|Peptidase aspartic. active site|IPR001220|Legume lectin. beta domain|IPR009007|Peptidase aspartic. catalytic|	1			0.285714285714286		0.285714285714286
b66	b66.a1	jgi|Polbr1|1419879|fgenesh1_pg.44_#_51|IPR013149|Alcohol dehydrogenase. zinc-binding|IPR013154|Alcohol dehydrogenase GroES-like|IPR002328|Alcohol dehydrogenase. zinc-containing. conserved site|IPR011032|GroES-like|IPR016040|NAD(P)-binding|	1					0.214285714285714	0.0714285714285714
b67	b67.a1	jgi|Polbr1|1413263|fgenesh1_kg.230_#_2_#_Locus2088v1rpkm78.33|IPR005135|Endonuclease/exonuclease/phosphatase|IPR005135|Endonuclease/exonuclease/phosphatase|	1				0.0714285714285714	0.214285714285714
b68	b68.a1	jgi|Polbr1|1400420|fgenesh1_kg.12_#_246_#_Locus1381v1rpkm115.15|IPR007312|Phosphoesterase|	1			0.375		0.125
b69	b69.a1	jgi|Polbr1|1495871|MIX4587_10656_36|GH30_3|Glycoside Hydrolase Family 30 protein|IPR001139|Glycoside hydrolase. family 30|IPR008972|Cupredoxin|IPR017853|Glycoside hydrolase. catalytic core|	1			0.181818181818182		0.181818181818182
b70	b70.a1	jgi|Polbr1|1456450|fgenesh1_pm.35_#_72|GH18|Glycoside Hydrolase Family 18 protein|IPR001579|Glycoside hydrolase. chitinase active site|IPR017853|Glycoside hydrolase. catalytic core|	3			0.8
b71	b71.a1	jgi|Polbr1|497798|CE497797_2765|IPR005135|Endonuclease/exonuclease/phosphatase|IPR005135|Endonuclease/exonuclease/phosphatase|	1			0.111111111111111		0.111111111111111
b72	b72.a1	jgi|Polbr1|1357935|e_gw1.60.61.1|IPR001842|Peptidase M36. fungalysin|IPR001842|Peptidase M36. fungalysin|IPR011096|Propeptide. peptidase M4 and M36|IPR001425|Rhodopsin. bacterial|	1				0.0625		0.125
b73	b73.a1	jgi|Polbr1|1338413|e_gw1.3.932.1|GH16|Glycoside Hydrolase Family 16 protein|IPR008985|Concanavalin A-like lectin/glucanase|	1				0.111111111111111		0.222222222222222
b74	b74.a1	jgi|Polbr1|876558|CE876557_2868|IPR013595|Peptidase S33. tripeptidyl-peptidase C-terminal|	1			0.0769230769230769	0.0769230769230769	0.0769230769230769
b75	b75.a1	jgi|Polbr1|1455149|fgenesh1_pm.19_#_39|AA3_2|GMC oxidoreductase|IPR000172|Glucose-methanol-choline oxidoreductase. N-terminal|IPR007867|Glucose-methanol-choline oxidoreductase. C-terminal|IPR012132|Glucose-methanol-choline oxidoreductase|IPR000172|Glucose-methanol-choline oxidoreductase. N-terminal|IPR000172|Glucose-methanol-choline oxidoreductase. N-terminal|	1					0.0869565217391304	0.0434782608695652
b76	b76.a1	jgi|Polbr1|1408780|fgenesh1_kg.68_#_35_#_Locus186v2rpkm20.25_PRE|IPR004000|Actin/actin-like|IPR004000|Actin/actin-like|IPR004000|Actin/actin-like|IPR004001|Actin. conserved site|IPR004001|Actin. conserved site|IPR004000|Actin/actin-like|	1					0.214285714285714
b77	b77.a1	jgi|Polbr1|1406302|fgenesh1_kg.43_#_75_#_Locus7665v1rpkm12.61|IPR002018|Carboxylesterase. type B|IPR002018|Carboxylesterase. type B|	1			0.105263157894737		0.0526315789473684
b78	b78.a1	jgi|Polbr1|1520904|MIX29620_1664_43|GH3|Glycoside Hydrolase Family 3 protein|IPR001764|Glycoside hydrolase. family 3. N-terminal|IPR001764|Glycoside hydrolase. family 3. N-terminal|IPR002772|Glycoside hydrolase. family 3. C-terminal|IPR017853|Glycoside hydrolase. catalytic core|IPR002772|Glycoside hydrolase. family 3. C-terminal|	1			0.05		0.1
b79	b79.a1	jgi|Polbr1|1480152|gm1.3733_g|GH125|Glycoside Hydrolase Family 125 protein|IPR008313|Uncharacterised conserved protein UCP028846|IPR008313|Uncharacterised conserved protein UCP028846|IPR008928|Six-hairpin glycosidase-like|	1					0.153846153846154
b80	b80.a1	jgi|Polbr1|1455782|fgenesh1_pm.25_#_20|IPR017853|Glycoside hydrolase. catalytic core|	1					0.142857142857143
b81	b81.a1	jgi|Polbr1|1353832|e_gw1.39.191.1|GH16|Glycoside Hydrolase Family 16 protein|IPR008985|Concanavalin A-like lectin/glucanase|	1				0.166666666666667	0.166666666666667
b82	b82.a1	jgi|Polbr1|1345138|e_gw1.12.122.1|IPR000120|Amidase signature enzyme|IPR000120|Amidase signature enzyme|	1					0.117647058823529
b83	b83.a1	jgi|Polbr1|1364243|e_gw1.128.52.1|AA8-AA3_1|Iron reductase domain / Cellobiose dehydrogenase|IPR007867|Glucose-methanol-choline oxidoreductase. C-terminal|IPR013027|FAD-dependent pyridine nucleotide-disulphide oxidoreductase|IPR000172|Glucose-methanol-choline oxidoreductase. N-terminal|IPR000172|Glucose-methanol-choline oxidoreductase. N-terminal|IPR008960|Carbohydrate-binding family 9/cellobiose…	1				0.0666666666666667	0.0666666666666667
b84	b84.a1	jgi|Polbr1|1488342|gm1.11923_g|IPR002018|Carboxylesterase. type B|IPR002018|Carboxylesterase. type B|	1				0.0666666666666667		0.0666666666666667
b85	b85.a1	jgi|Polbr1|1489872|gm1.13453_g|IPR002018|Carboxylesterase. type B|IPR002018|Carboxylesterase. type B|IPR002018|Carboxylesterase. type B|	1		0.0625	0.0625
b86	b86.a1	jgi|Polbr1|1346902|e_gw1.16.37.1|IPR008758|Peptidase S28|	1			0.125
b87	b87.a1	jgi|Polbr1|1346052|e_gw1.14.120.1|IPR002018|Carboxylesterase. type B|IPR002018|Carboxylesterase. type B|IPR002018|Carboxylesterase. type B|	1					0.0526315789473684	0.0526315789473684
b88	b88.a1	jgi|Polbr1|1400708|fgenesh1_kg.13_#_253_#_Locus10676v1rpkm3.50|IPR001563|Peptidase S10. serine carboxypeptidase|IPR001563|Peptidase S10. serine carboxypeptidase|IPR001563|Peptidase S10. serine carboxypeptidase|IPR001563|Peptidase S10. serine carboxypeptidase|	1	0.2		0.2
b89	b89.a1	jgi|Polbr1|1557562|estExt_Genemark1.C_380050|AA5_1|Copper radical oxidase|IPR009880|Glyoxal oxidase. N-terminal|IPR015202|Region of unknown function DUF1929|IPR011043|Galactose oxidase/kelch. beta-propeller|IPR014756|Immunoglobulin E-set|	1					0.153846153846154
b90	b90.a1	jgi|Polbr1|1352206|e_gw1.33.115.1|GH79|Glycoside Hydrolase Family 79 protein|	1					0.166666666666667
b91	b91.a1	jgi|Polbr1|357274|CE357273_5452|AA1_1|Laccase|IPR001117|Multicopper oxidase. type 1|IPR011706|Multicopper oxidase. type 2|IPR011707|Multicopper oxidase. type 3|IPR002355|Multicopper oxidase. copper-binding site|IPR008972|Cupredoxin|	1			0.142857142857143

## Sheet: Compare spectra Psan1264 Q-Exa
Proteomics complementary data for Psan1264. Number of identified spectra in each condition (Maltose + Lignin and Lignin) at days 7 and 14 following the Q-Exactive analysis methods.
Group ID	Sub-group ID	Protein Description	Number of proteins	Day3_Maltose+Lignin	Day3_Lignin	Day7_Maltose+Lignin	Day7_Lignin	Day14_Maltose+Lignin	Day14_Lignin
a1	a1.a1	jgi|Pycsa1|1583166|[(1-21)SIGN][(22-518)AA1_1]|1.10.3.2|KOG1263|Multicopper oxidases|	1	1	9	204	8	145	4
a1	a1.a2	jgi|Pycsa1|1560767|[(0-0)AA1_1]|1.10.3.2|KOG1263|Multicopper oxidases|	1	1	1	19	1	6	0
a1	a1.a3	jgi|Pycsa1|1326600|[(1-20)SIGN][(21-518)AA1_1]|1.10.3.2|KOG1263|Multicopper oxidases|	1	0	0	10	0	7	1
a1	a1.a4	jgi|Pycsa1|1639180|[(0-0)AA1_1]|1.10.3.2|KOG1263|Multicopper oxidases|	1	0	0	5	0	3	0
a2	a2.a1	jgi|Pycsa1|1583090|[(1-18)SIGN][(19-456)GH7]|	1	0	46	31	33	26	30
a2	a2.a2	jgi|Pycsa1|1675671|[(0-0)GH7]|	1	0	16	13	10	14	12
a3	a3.a1	jgi|Pycsa1|1727634|[(0-0)GH55]|	1	0	12	67	12	60	9
a4	a4.a1	jgi|Pycsa1|1575750|[(0-0)GH76_dist]|3.2.1.101|	1	2	20	73	15	36	12
a5	a5.a1	jgi|Pycsa1|1663870|[(0-0)GH92]|	1	0	3	69	2	55	2
a5	a5.a2	jgi|Pycsa1|1609029|[(0-0)GH92]|	1	0	0	7	0	7	0
a6	a6.a1	jgi|Pycsa1|1614322|[(0-0)GH15_1][(0-0)CBM20]|3.2.1.3|	1	2	15	51	20	33	10
a7	a7.a1	jgi|Pycsa1|1750423|[(1-19)SIGN][(26-366)GH28_9]|3.2.1.15|3.2.1.15|	1	1	25	47	8	31	4
a8	a8.a1	jgi|Pycsa1|272447|3.4.23.5|KOG1339|Aspartyl protease|	1	0	8	44	5	32	4
a9	a9.a1	jgi|Pycsa1|1583177|[(1-21)UNK][(22-314)GH16_fun1]|	1	1	12	23	9	18	10
b10	b10.a1	jgi|Pycsa1|1672103|[(0-0)X41][(0-0)X41][(0-0)X41][(0-0)X41][(0-0)AA5_1]|KOG4157|beta-1,6-N-acetylglucosaminyltransferase, contains WSC domain|KOG4157|beta-1,6-N-acetylglucosaminyltransferase, contains WSC domain|	1	1	13	26	4	17	2
b11	b11.a1	jgi|Pycsa1|1689740|	1	0	5	23	4	19	2
b11	b11.a2	jgi|Pycsa1|1677366|	1	0	0	5	0	3	0
b11	b11.a3	jgi|Pycsa1|1605010|	1	0	0	5	0	2	0
b12	b12.a1	jgi|Pycsa1|1689209|[(0-0)AA5_1]|6.3.2.-|6.3.2.-|KOG2806|Chitinase|	1	0	2	31	1	25	2
b13	b13.a1	jgi|Pycsa1|1583073|	1	0	7	25	4	17	4
b14	b14.a1	jgi|Pycsa1|1598645|[(0-0)GH27][(0-0)X111]|3.2.1.22|3.2.1.22|3.2.1.22|3.2.1.22|KOG2366|Alpha-D-galactosidase (melibiase)|	1	1	3	23	4	21	1
b15	b15.a1	jgi|Pycsa1|1676925|[(0-0)PL8_4][(0-0)X107]|	1	3	4	19	3	17	2
b16	b16.a1	jgi|Pycsa1|1682926|KOG0849|Transcription factor PRD and related proteins, contain PAX and HOX domains|	1	2	5	17	4	15	3
b17	b17.a1	jgi|Pycsa1|1571620|[(0-0)X10][(0-0)GH51_af6]|	1	0	4	18	2	14	1
b18	b18.a1	jgi|Pycsa1|1680674|[(0-0)GH30_3]|KOG2566|Beta-glucocerebrosidase|	1	0	2	17	0	14	2
b18	b18.a2	jgi|Pycsa1|1597347|[(0-0)GH30_3]|KOG2566|Beta-glucocerebrosidase|	1	0	0	4	0	2	0
b19	b19.a1	jgi|Pycsa1|1560745|[(0-0)GH79]|	1	0	0	16	1	19	2
b20	b20.a1	jgi|Pycsa1|1590027|[(0-0)GH35_2]|3.2.1.23|3.2.1.23|3.2.1.23|3.2.1.23|3.2.1.23|KOG0496|Beta-galactosidase|	1	0	1	16	2	17	1
b21	b21.a1	jgi|Pycsa1|1579336|[(1-24)SIGN][(28-424)GH5_9]|3.2.1.58|	1	0	9	14	5	7	1
b22	b22.a1	jgi|Pycsa1|1586920|[(1-19)SIGN][(20-172)X95][(179-552)GH20]|3.2.1.52|3.2.1.52|3.2.1.52|3.2.1.52|3.2.1.52|KOG2499|Beta-N-acetylhexosaminidase|	1	0	1	15	1	14	2
b22	b22.a2	jgi|Pycsa1|1586923|[(1-18)SIGN][(19-171)X95][(178-550)GH20]|3.2.1.52|3.2.1.52|3.2.1.52|3.2.1.52|3.2.1.52|KOG2499|Beta-N-acetylhexosaminidase|	1	0	0	2	0	3	0
b23	b23.a1	jgi|Pycsa1|1567160|[(0-0)GH95]|	1	0	1	18	1	13	1
b24	b24.a1	jgi|Pycsa1|1558729|KOG1721|FOG: Zn-finger|	1	0	0	19	1	12	0
b25	b25.a1	jgi|Pycsa1|1562796|3.4.14.9|	1	0	0	17	0	15	0
b26	b26.a1	jgi|Pycsa1|1559723|[(0-0)GH31]|3.2.1.20|3.2.1.20|KOG1065|Maltase glucoamylase and related hydrolases, glycosyl hydrolase family 31|	1	0	2	12	2	14	0
b27	b27.a1	jgi|Pycsa1|502114|	1	0	0	18	1	10	0
b27	b27.a2	jgi|Pycsa1|1674851|	1	0	0	3	0	0	0
b28	b28.a1	jgi|Pycsa1|1695354|[(0-0)GH43_B]|	1	0	0	16	0	13	0
b29	b29.a1	jgi|Pycsa1|1572980|	1	0	3	12	0	9	1
b30	b30.a1	jgi|Pycsa1|1589244|[(0-0)GH27]|3.2.1.22|3.2.1.22|3.2.1.22|3.2.1.22|KOG2366|Alpha-D-galactosidase (melibiase)|	1	0	1	11	2	9	2
b31	b31.a1	jgi|Pycsa1|1537322|[(0-0)GH3]|	1	0	1	10	1	7	2
b31	b31.a2	jgi|Pycsa1|1598628|[(0-0)CBM1][(0-0)GH3]|3.2.1.21|3.2.1.21|3.2.1.21|	1	0	2	4	1	3	1
b32	b32.a1	jgi|Pycsa1|1588246|[(0-0)GH13_32][(0-0)CBM20]|3.2.1.1|KOG2212|Alpha-amylase|	1	0	0	15	0	9	0
b33	b33.a1	jgi|Pycsa1|1586203|3.1.1.7|KOG4389|Acetylcholinesterase/Butyrylcholinesterase|	1	0	2	10	0	10	1
b34	b34.a1	jgi|Pycsa1|1592699|3.4.23.25|KOG1339|Aspartyl protease|	1	0	1	12	1	8	1
b35	b35.a1	jgi|Pycsa1|1590841|[(0-0)GH55]|	1	0	2	9	1	9	2
b36	b36.a1	jgi|Pycsa1|1672751|[(1-19)SIGN][(20-203)AA8][(204-229)UNK][(230-769)AA3_1]|1.1.99.1|KOG1238|Glucose dehydrogenase/choline dehydrogenase/mandelonitrile lyase (GMC oxidoreductase family)|	1	0	5	8	4	4	1
b37	b37.a1	jgi|Pycsa1|1571187|[(1-27)SIGN][(28-57)UNK][(58-339)GH18_dist]|	1	0	1	9	3	7	2
b38	b38.a1	jgi|Pycsa1|1609201|[(0-0)GH47]|3.2.1.113|KOG2431|1, 2-alpha-mannosidase|	1	0	0	11	0	10	1
b39	b39.a1	jgi|Pycsa1|1664834|[(0-0)GH2_Mnd2]|3.2.1.25|KOG2230|Predicted beta-mannosidase|	1	0	1	10	2	8	1
b40	b40.a1	jgi|Pycsa1|1710073|3.1.1.1|KOG1516|Carboxylesterase and related proteins|	1	1	4	7	4	4	1
b41	b41.a1	jgi|Pycsa1|1602760|3.4.14.9|	1	0	1	10	2	7	1
b42	b42.a1	jgi|Pycsa1|1574363|[(0-0)AA3_2]|1.1.99.1|KOG1238|Glucose dehydrogenase/choline dehydrogenase/mandelonitrile lyase (GMC oxidoreductase family)|	1	1	3	7	2	3	3
b43	b43.a1	jgi|Pycsa1|1677054|3.4.16.6|KOG1282|Serine carboxypeptidases (lysosomal cathepsin A)|KOG1282|Serine carboxypeptidases (lysosomal cathepsin A)|	1	0	2	7	3	5	2
b44	b44.a1	jgi|Pycsa1|1738933|[(0-0)GH28_rgl]|	1	0	4	5	2	4	2
b45	b45.a1	jgi|Pycsa1|1561925|[(0-0)GH79]|	1	0	4	4	3	4	2
b46	b46.a1	jgi|Pycsa1|1721886|[(0-0)GH74]|	1	0	2	6	3	5	1
b47	b47.a1	jgi|Pycsa1|1560782|[(1-20)SIGN][(21-55)CBM1][(56-87)LNK][(88-382)GH10_5]|	1	0	5	2	4	2	3
b48	b48.a1	jgi|Pycsa1|1600918|[(0-0)GH18][(0-0)CBM5]|3.2.1.14|KOG2806|Chitinase|	1	0	2	3	4	3	2
b48	b48.a2	jgi|Pycsa1|1672749|[(0-0)GH18][(0-0)CBM5]|3.2.1.14|KOG2806|Chitinase|	1	0	2	3	3	3	2
b49	b49.a1	jgi|Pycsa1|1565342|[(0-0)GH72][(0-0)CBM43_b]|KOG4719|Nuclear pore complex protein|KOG4719|Nuclear pore complex protein|	1	1	2	7	0	4	2
b50	b50.a1	jgi|Pycsa1|1608349|3.4.16.5|KOG1282|Serine carboxypeptidases (lysosomal cathepsin A)|KOG1282|Serine carboxypeptidases (lysosomal cathepsin A)|	1	0	2	8	0	6	0
b51	b51.a1	jgi|Pycsa1|1585887|	1	0	1	7	0	6	1
b52	b52.a1	jgi|Pycsa1|1705196|[(0-0)GH31]|3.2.1.20|3.2.1.20|KOG1065|Maltase glucoamylase and related hydrolases, glycosyl hydrolase family 31|	1	0	0	7	1	6	1
b53	b53.a1	jgi|Pycsa1|1680487|[(0-0)GH115]|	1	0	1	6	1	4	2
b54	b54.a1	jgi|Pycsa1|1590513|3.4.-.-|3.4.-.-|KOG2182|Hydrolytic enzymes of the alpha/beta hydrolase fold|KOG2182|Hydrolytic enzymes of the alpha/beta hydrolase fold|	1	0	2	6	0	6	0
b55	b55.a1	jgi|Pycsa1|1653985|[(0-0)GH18]|3.2.1.14|KOG2806|Chitinase|	1	0	2	5	1	3	2
b56	b56.a1	jgi|Pycsa1|1675320|[(1-18)SIGN][(19-29)UNK][(30-233)GH25]|	1	0	0	6	1	5	1
b57	b57.a1	jgi|Pycsa1|1677842|	1	0	1	7	1	4	0
b58	b58.a1	jgi|Pycsa1|1672345|[(1-19)SIGN][(20-55)CBM1][(56-92)UNK][(93-444)GH5_7]|KOG1216|von Willebrand factor and related coagulation proteins|KOG1216|von Willebrand factor and related coagulation proteins|	1	0	2	6	1	3	1
b59	b59.a1	jgi|Pycsa1|1636006|	1	0	0	9	0	4	0
b60	b60.a1	jgi|Pycsa1|1749163|3.4.14.9|	1	0	1	5	1	4	1
b61	b61.a1	jgi|Pycsa1|1608570|	1	0	0	8	0	4	0
b62	b62.a1	jgi|Pycsa1|1718525|KOG4297|C-type lectin|KOG4297|C-type lectin|	1	0	1	3	1	4	2
b63	b63.a1	jgi|Pycsa1|1648421|[(0-0)AA3_4]|	1	0	0	2	3	3	3
b64	b64.a1	jgi|Pycsa1|620905|[(0-0)GH43_F][(0-0)CBM35]|	1	0	1	5	1	4	0
b65	b65.a1	jgi|Pycsa1|1585331|	1	0	1	6	1	2	1
b66	b66.a1	jgi|Pycsa1|1566079|	1	0	1	5	2	2	1
b67	b67.a1	jgi|Pycsa1|1675136|	1	0	0	3	1	4	3
b68	b68.a1	jgi|Pycsa1|1612276|	1	0	0	5	0	5	1
b69	b69.a1	jgi|Pycsa1|1547540|	1	0	2	5	1	3	0
b70	b70.a1	jgi|Pycsa1|1677049|3.4.16.6|KOG1282|Serine carboxypeptidases (lysosomal cathepsin A)|KOG1282|Serine carboxypeptidases (lysosomal cathepsin A)|	1	1	0	5	0	3	1
b71	b71.a1	jgi|Pycsa1|1611075|[(1-18)SIGN][(19-386)CE8]|	1	0	1	5	1	3	0
b72	b72.a1	jgi|Pycsa1|1588252|[(0-0)GH16_fun2]|	1	0	1	4	0	5	0
b73	b73.a1	jgi|Pycsa1|1567787|[(1-20)SIGN][(21-56)CBM1][(57-94)UNK][(95-451)GH6_3]|	1	0	2	4	1	2	1
b74	b74.a1	jgi|Pycsa1|1547658|	1	0	0	5	0	5	0
b75	b75.a1	jgi|Pycsa1|1192565|	1	0	0	5	0	5	0
b76	b76.a1	jgi|Pycsa1|1577052|[(0-0)GH3]|3.2.1.21|3.2.1.21|3.2.1.21|	1	0	1	5	1	3	0
b77	b77.a1	jgi|Pycsa1|1755702|[(0-0)GH78]|	1	0	1	6	0	3	0
b78	b78.a1	jgi|Pycsa1|1000963|	1	0	3	2	2	1	1
b79	b79.a1	jgi|Pycsa1|1612129|3.4.23.5|KOG1339|Aspartyl protease|	1	1	1	4	0	3	0
b80	b80.a1	jgi|Pycsa1|1538639|KOG1745|Histones H3 and H4|	4	0	8	0	1	0	0
b81	b81.a1	jgi|Pycsa1|1589034|KOG1516|Carboxylesterase and related proteins|	1	0	1	3	0	4	1
b82	b82.a1	jgi|Pycsa1|1599824|	1	0	1	5	0	3	0
b83	b83.a1	jgi|Pycsa1|1680425|	1	0	1	5	0	3	0
b84	b84.a1	jgi|Pycsa1|1571675|[(0-0)GH12]|	1	0	0	4	2	2	1
b85	b85.a1	jgi|Pycsa1|12062|3.4.23.3|KOG1339|Aspartyl protease|	1	0	0	4	1	4	0
b86	b86.a1	jgi|Pycsa1|1577230|[(0-0)GH28_rgx]|	1	0	0	6	0	3	0
b87	b87.a1	jgi|Pycsa1|1668791|KOG0676|Actin and related proteins|	1	0	2	2	1	2	1
b88	b88.a1	jgi|Pycsa1|1676339|	1	0	1	2	1	2	0
b88	b88.a2	jgi|Pycsa1|1592328|	1	0	1	1	0	1	0
b89	b89.a1	jgi|Pycsa1|1610208|3.4.16.-|KOG1282|Serine carboxypeptidases (lysosomal cathepsin A)|KOG1282|Serine carboxypeptidases (lysosomal cathepsin A)|	1	0	0	4	0	4	0
b90	b90.a1	jgi|Pycsa1|1586161|	1	0	0	4	1	3	0
b91	b91.a1	jgi|Pycsa1|1615309|[(0-0)GH16_fun2]|	1	0	1	5	0	2	0
b92	b92.a1	jgi|Pycsa1|1610181|[(1-19)SIGN][(20-55)CBM1][(56-82)UNK][(83-400)GH10]|	1	0	0	4	0	2	1
b92	b92.a2	jgi|Pycsa1|1589823|[(1-19)SIGN][(20-55)CBM1][(56-79)UNK][(80-394)GH10]|	1	0	0	3	0	1	0
b93	b93.a1	jgi|Pycsa1|1592250|	1	0	0	3	1	3	1
b94	b94.a1	jgi|Pycsa1|1565370|[(0-0)CE4]|KOG0845|Nuclear pore complex, Nup98 component (sc Nup145/Nup100/Nup116)|KOG0845|Nuclear pore complex, Nup98 component (sc Nup145/Nup100/Nup116)|	1	0	1	3	2	2	0
b95	b95.a1	jgi|Pycsa1|1577721|[(0-0)CE8]|	1	0	1	4	0	3	0
b96	b96.a1	jgi|Pycsa1|1637500|3.4.23.18|KOG1339|Aspartyl protease|	1	0	2	4	1	1	0
b97	b97.a1	jgi|Pycsa1|1603355|[(0-0)GH32][(0-0)X101]|3.2.1.26|3.2.1.26|KOG0228|Beta-fructofuranosidase (invertase)|	1	0	0	5	0	3	0
b98	b98.a1	jgi|Pycsa1|1611547|[(0-0)GH5_9]|3.2.1.58|	1	0	2	2	1	1	1
b99	b99.a1	jgi|Pycsa1|1565060|KOG0379|Kelch repeat-containing proteins|	1	0	0	4	0	3	0
c100	c100.a1	jgi|Pycsa1|790266|3.4.21.48|KOG1153|Subtilisin-related protease/Vacuolar protease B|	1	0	2	1	2	1	1
c101	c101.a1	jgi|Pycsa1|1561162|KOG3467|Histone H4|	4	0	6	0	1	0	0
c102	c102.a1	jgi|Pycsa1|1721241|[(0-0)GH92]|	1	0	0	3	0	4	0
c103	c103.a1	jgi|Pycsa1|1588022|	1	0	1	4	0	2	0
c104	c104.a1	jgi|Pycsa1|1577270|	1	0	2	2	1	2	0
c105	c105.a1	jgi|Pycsa1|1615498|3.1.27.1|KOG1642|Ribonuclease, T2 family|	1	0	0	4	0	3	0
c106	c106.a1	jgi|Pycsa1|1607820|6.3.2.-|6.3.2.-|KOG1282|Serine carboxypeptidases (lysosomal cathepsin A)|KOG1282|Serine carboxypeptidases (lysosomal cathepsin A)|	1	0	0	1	1	3	1
c107	c107.a1	jgi|Pycsa1|1581796|3.1.1.-|3.1.1.-|3.1.1.-|KOG4569|Predicted lipase|	1	0	1	2	0	2	1
c108	c108.a1	jgi|Pycsa1|1672687|	1	0	2	2	1	1	0
c109	c109.a1	jgi|Pycsa1|1674301|3.1.1.1|KOG4389|Acetylcholinesterase/Butyrylcholinesterase|	1	0	1	3	2	0	0
c110	c110.a1	jgi|Pycsa1|1590088|[(0-0)GH37]|3.2.1.28|KOG0602|Neutral trehalase|	1	0	1	5	0	0	0
c111	c111.a1	jgi|Pycsa1|1428239|[(1-20)SIGN][(21-34)UNK][(35-403)GH88]|	1	0	1	3	0	2	0
c112	c112.a1	jgi|Pycsa1|1601936|[(0-0)AA3_2]|1.1.99.1|KOG1238|Glucose dehydrogenase/choline dehydrogenase/mandelonitrile lyase (GMC oxidoreductase family)|	1	0	0	3	0	3	0
c113	c113.a1	jgi|Pycsa1|1589678|	1	0	0	4	0	2	0
c114	c114.a1	jgi|Pycsa1|1610761|[(0-0)CBM18][(0-0)GH16_1]|3.2.1.73|	1	0	1	2	1	1	0
c115	c115.a1	jgi|Pycsa1|212359|	1	0	1	1	0	2	1
c116	c116.a1	jgi|Pycsa1|1631901|[(0-0)GH18][(0-0)CBM5]|3.2.1.14|KOG4701|Chitinase|	1	0	1	3	0	1	0
c117	c117.a1	jgi|Pycsa1|1581112|	1	0	0	4	0	1	0
c118	c118.a1	jgi|Pycsa1|1701524|KOG3619|Adenylate/guanylate cyclase|	1	0	0	2	0	3	0
c119	c119.a1	jgi|Pycsa1|1755743|[(1-27)SIGN][(28-340)GH18_14][(345-394)CBM5][(395-417)UNK][(418-468)CBM5][(469-495)UNK]|3.2.1.14|KOG4701|Chitinase|	1	0	1	3	0	0	1
c120	c120.a1	jgi|Pycsa1|1679445|[(0-0)GH10]|	1	0	0	2	0	3	0
c121	c121.a1	jgi|Pycsa1|114001|3.1.3.5|3.1.3.5|3.1.3.5|	1	0	0	3	0	2	0
c122	c122.a1	jgi|Pycsa1|1645517|[(0-0)GH17_gs]|	1	0	0	2	0	3	0
c123	c123.a1	jgi|Pycsa1|1602212|	1	0	0	3	0	2	0
c124	c124.a1	jgi|Pycsa1|1562230|[(1-21)SIGN][(22-79)UNK][(80-345)CE16]|	1	0	0	3	0	2	0
c125	c125.a1	jgi|Pycsa1|1594299|	1	0	0	3	0	2	0
c126	c126.a1	jgi|Pycsa1|1671724|3.4.14.9|	1	0	2	1	1	0	0
c127	c127.a1	jgi|Pycsa1|1617673|	1	0	0	3	0	1	0
c128	c128.a1	jgi|Pycsa1|1652042|KOG0052|Translation elongation factor EF-1 alpha/Tu|	1	0	2	0	0	1	1
c129	c129.a1	jgi|Pycsa1|1609963|[(0-0)PL14_5]|	1	0	0	1	1	2	0
c130	c130.a1	jgi|Pycsa1|1589586|	1	0	0	2	0	2	0
c131	c131.a1	jgi|Pycsa1|1562112|3.4.16.5|KOG1282|Serine carboxypeptidases (lysosomal cathepsin A)|KOG1282|Serine carboxypeptidases (lysosomal cathepsin A)|	1	0	2	0	0	2	0
c132	c132.a1	jgi|Pycsa1|1597910|	1	0	0	1	0	2	1
c133	c133.a1	jgi|Pycsa1|1576418|[(0-0)GH17]|3.2.1.58|	1	0	0	1	0	3	0
c134	c134.a1	jgi|Pycsa1|1678350|3.4.23.5|KOG1339|Aspartyl protease|	1	0	0	1	0	3	0
c135	c135.a1	jgi|Pycsa1|1677933|[(0-0)CBM1][(0-0)CE1]|	1	0	2	1	0	1	0
c136	c136.a1	jgi|Pycsa1|1610420|3.1.27.1|KOG1642|Ribonuclease, T2 family|	1	0	0	3	0	1	0
c137	c137.a1	jgi|Pycsa1|1593425|[(1-20)SIGN][(21-469)GH5_15]|3.2.1.58|	1	0	0	2	0	2	0
c138	c138.a1	jgi|Pycsa1|1588377|[(1-23)SIGN][(24-54)UNK][(55-505)GH125]|	1	0	0	3	0	1	0
c139	c139.a1	jgi|Pycsa1|112698|3.1.3.5|3.1.3.5|3.1.3.5|	1	0	0	3	0	1	0
c140	c140.a1	jgi|Pycsa1|1639615|[(0-0)GH16_fun2]|	1	0	0	1	0	2	0
c141	c141.a1	jgi|Pycsa1|1127567|[(1-19)SIGN][(22-317)GH16_fun1]|	1	0	0	2	0	1	0
c142	c142.a1	jgi|Pycsa1|1572306|	1	0	0	3	0	0	0
c143	c143.a1	jgi|Pycsa1|1719016|[(0-0)GH30]|	1	0	2	1	0	0	0
c144	c144.a1	jgi|Pycsa1|1562720|	1	0	1	0	0	2	0
c145	c145.a1	jgi|Pycsa1|1615445|	1	0	0	2	0	1	0
c146	c146.a1	jgi|Pycsa1|1571777|	1	0	0	1	0	2	0
c147	c147.a1	jgi|Pycsa1|1590768|[(0-0)GH28_pgx]|3.2.1.67|	1	0	0	1	0	2	0
c148	c148.a1	jgi|Pycsa1|1575571|	1	0	0	1	0	2	0
c149	c149.a1	jgi|Pycsa1|1605422|3.1.3.2|3.1.3.2|KOG1382|Multiple inositol polyphosphate phosphatase|	1	0	0	2	0	1	0
c150	c150.a1	jgi|Pycsa1|385598|[(1-17)SIGN][(18-229)AA9]|	1	0	0	2	0	1	0
c151	c151.a1	jgi|Pycsa1|1594975|[(0-0)GH92]|	1	0	0	2	0	1	0
c152	c152.a1	jgi|Pycsa1|1577318|	1	0	0	2	0	1	0
c153	c153.a1	jgi|Pycsa1|1734119|6.3.5.-|6.3.5.-|KOG1211|Amidases|	1	0	0	1	0	2	0
c154	c154.a1	jgi|Pycsa1|187563|	1	0	0	2	0	1	0
c155	c155.a1	jgi|Pycsa1|1574209|KOG4419|5' nucleotidase|	1	0	0	2	0	1	0
c156	c156.a1	jgi|Pycsa1|1667469|3.1.1.1|KOG1516|Carboxylesterase and related proteins|	1	0	1	2	0	0	0
c157	c157.a1	jgi|Pycsa1|1601758|KOG0907|Thioredoxin|	1	0	0	2	0	1	0
c158	c158.a1	jgi|Pycsa1|1590375|	1	0	0	2	0	1	0
c159	c159.a1	jgi|Pycsa1|1593698|[(0-0)GH31]|3.2.1.20|3.2.1.20|KOG1065|Maltase glucoamylase and related hydrolases, glycosyl hydrolase family 31|	1	0	0	2	0	1	0
c160	c160.a1	jgi|Pycsa1|1596128|3.4.16.6|KOG1282|Serine carboxypeptidases (lysosomal cathepsin A)|KOG1282|Serine carboxypeptidases (lysosomal cathepsin A)|	1	0	0	2	0	1	0
c161	c161.a1	jgi|Pycsa1|83628|[(0-0)GH79]|	1	0	1	1	0	0	0
c162	c162.a1	jgi|Pycsa1|1610435|[(0-0)GH7]|	1	0	2	0	0	0	0
c163	c163.a1	jgi|Pycsa1|1615206|[(0-0)GH18]|3.2.1.14|KOG2806|Chitinase|	1	0	0	2	0	0	0
c164	c164.a1	jgi|Pycsa1|1600019|[(1-18)SIGN][(19-238)AA9]|	1	0	1	1	0	0	0
c165	c165.a1	jgi|Pycsa1|1542987|	1	0	0	1	0	1	0
c166	c166.a1	jgi|Pycsa1|1586934|	2	0	0	1	0	1	0
c167	c167.a1	jgi|Pycsa1|1575496|1.6.99.1|KOG0134|NADH:flavin oxidoreductase/12-oxophytodienoate reductase|KOG0134|NADH:flavin oxidoreductase/12-oxophytodienoate reductase|	1	0	1	1	0	0	0
c168	c168.a1	jgi|Pycsa1|1568994|3.4.16.2|KOG2182|Hydrolytic enzymes of the alpha/beta hydrolase fold|KOG2182|Hydrolytic enzymes of the alpha/beta hydrolase fold|	1	0	0	2	0	0	0
c169	c169.a1	jgi|Pycsa1|1562669|3.4.23.1|KOG1339|Aspartyl protease|	1	0	0	0	0	2	0
c170	c170.a1	jgi|Pycsa1|1581540|	1	0	0	2	0	0	0
c171	c171.a1	jgi|Pycsa1|1674106|[(1-20)SIGN][(21-55)CBM1][(56-78)LNK][(79-386)GH5_5]|	1	0	0	2	0	0	0
c172	c172.a1	jgi|Pycsa1|1561243|3.4.23.3|KOG1339|Aspartyl protease|	1	0	0	2	0	0	0
c173	c173.a1	jgi|Pycsa1|1581106|[(0-0)GH16_fun1]|KOG4157|beta-1,6-N-acetylglucosaminyltransferase, contains WSC domain|KOG4157|beta-1,6-N-acetylglucosaminyltransferase, contains WSC domain|	1	0	0	2	0	0	0
c174	c174.a1	jgi|Pycsa1|1594881|[(1-22)SIGN][(28-335)GH18_14][(336-377)LNK][(378-428)CBM5][(429-454)UNK]|3.2.1.14|KOG4701|Chitinase|	1	0	0	2	0	0	0

## Sheet: Compare PAI Psan1264 Q-Exa
Proteomics complementary data for Psan1264. Protein Abundance Index (PAI) in each condition (Maltose + Lignin and Lignin) at days 7 and 14 following the Q-Exactive analysis methods.
				Day3_Maltose+Lignin	Day3_Lignin	Day7_Maltose+Lignin	Day7_Lignin	Day14_Maltose+Lignin	Day14_Lignin
Group ID	Sub-group ID	Protein Description	Number of proteins	PAI
a1	a1.a1	jgi|Pycsa1|1583166|[(1-21)SIGN][(22-518)AA1_1]|1.10.3.2|KOG1263|Multicopper oxidases|	1	0.1	0.5	6.6	0.5	5.5	0.2
a1	a1.a2	jgi|Pycsa1|1560767|[(0-0)AA1_1]|1.10.3.2|KOG1263|Multicopper oxidases|	1	0.125	0.125	1.375	0.125	0.75
a1	a1.a3	jgi|Pycsa1|1326600|[(1-20)SIGN][(21-518)AA1_1]|1.10.3.2|KOG1263|Multicopper oxidases|	1			0.714285714285714		0.5	0.0714285714285714
a1	a1.a4	jgi|Pycsa1|1639180|[(0-0)AA1_1]|1.10.3.2|KOG1263|Multicopper oxidases|	1			0.416666666666667		0.25
a2	a2.a1	jgi|Pycsa1|1583090|[(1-18)SIGN][(19-456)GH7]|	1		0.75	1.1	0.5	0.8	0.55
a2	a2.a2	jgi|Pycsa1|1675671|[(0-0)GH7]|	1		0.470588235294118	0.647058823529412	0.235294117647059	0.470588235294118	0.352941176470588
a3	a3.a1	jgi|Pycsa1|1727634|[(0-0)GH55]|	1		0.666666666666667	3.22222222222222	0.666666666666667	2.66666666666667	0.444444444444444
a4	a4.a1	jgi|Pycsa1|1575750|[(0-0)GH76_dist]|3.2.1.101|	1	0.222222222222222	1	2.33333333333333	0.777777777777778	1.77777777777778	0.666666666666667
a5	a5.a1	jgi|Pycsa1|1663870|[(0-0)GH92]|	1		0.105263157894737	1.78947368421053	0.105263157894737	1.57894736842105	0.0526315789473684
a5	a5.a2	jgi|Pycsa1|1609029|[(0-0)GH92]|	1			0.260869565217391		0.260869565217391
a6	a6.a1	jgi|Pycsa1|1614322|[(0-0)GH15_1][(0-0)CBM20]|3.2.1.3|	1	0.333333333333333	1.33333333333333	4.83333333333333	1.66666666666667	3	1.16666666666667
a7	a7.a1	jgi|Pycsa1|1750423|[(1-19)SIGN][(26-366)GH28_9]|3.2.1.15|3.2.1.15|	1	0.111111111111111	2	3.22222222222222	0.666666666666667	1.88888888888889	0.333333333333333
a8	a8.a1	jgi|Pycsa1|272447|3.4.23.5|KOG1339|Aspartyl protease|	1		0.363636363636364	1.18181818181818	0.272727272727273	0.727272727272727	0.363636363636364
a9	a9.a1	jgi|Pycsa1|1583177|[(1-21)UNK][(22-314)GH16_fun1]|	1	0.142857142857143	1	2	0.857142857142857	1.71428571428571	0.857142857142857
b10	b10.a1	jgi|Pycsa1|1672103|[(0-0)X41][(0-0)X41][(0-0)X41][(0-0)X41][(0-0)AA5_1]|KOG4157|beta-1.6-N-acetylglucosaminyltransferase. contains WSC domain|KOG4157|beta-1.6-N-acetylglucosaminyltransferase. contains WSC domain|	1	0.0833333333333333	0.833333333333333	1.5	0.333333333333333	1.08333333333333	0.166666666666667
b11	b11.a1	jgi|Pycsa1|1689740|	1		1	5.33333333333333	0.666666666666667	5	0.666666666666667
b11	b11.a2	jgi|Pycsa1|1677366|	1			2.5		1.5
b11	b11.a3	jgi|Pycsa1|1605010|	1			1.66666666666667		0.666666666666667
b12	b12.a1	jgi|Pycsa1|1689209|[(0-0)AA5_1]|6.3.2.-|6.3.2.-|KOG2806|Chitinase|	1		0.0714285714285714	0.785714285714286	0.0357142857142857	0.607142857142857	0.0714285714285714
b13	b13.a1	jgi|Pycsa1|1583073|	1		0.233333333333333	0.766666666666667	0.133333333333333	0.5	0.133333333333333
b14	b14.a1	jgi|Pycsa1|1598645|[(0-0)GH27][(0-0)X111]|3.2.1.22|3.2.1.22|3.2.1.22|3.2.1.22|KOG2366|Alpha-D-galactosidase (melibiase)|	1	0.0909090909090909	0.272727272727273	1.54545454545455	0.272727272727273	1.18181818181818	0.0909090909090909
b15	b15.a1	jgi|Pycsa1|1676925|[(0-0)PL8_4][(0-0)X107]|	1	0.157894736842105	0.210526315789474	0.684210526315789	0.157894736842105	0.578947368421053	0.105263157894737
b16	b16.a1	jgi|Pycsa1|1682926|KOG0849|Transcription factor PRD and related proteins. contain PAX and HOX domains|	1	0.0714285714285714	0.178571428571429	0.571428571428571	0.142857142857143	0.5	0.107142857142857
b17	b17.a1	jgi|Pycsa1|1571620|[(0-0)X10][(0-0)GH51_af6]|	1		0.181818181818182	0.727272727272727	0.0909090909090909	0.545454545454545	0.0454545454545455
b18	b18.a1	jgi|Pycsa1|1680674|[(0-0)GH30_3]|KOG2566|Beta-glucocerebrosidase|	1		0.142857142857143	0.714285714285714		0.714285714285714	0.142857142857143
b18	b18.a2	jgi|Pycsa1|1597347|[(0-0)GH30_3]|KOG2566|Beta-glucocerebrosidase|	1			0.4		0.2
b19	b19.a1	jgi|Pycsa1|1560745|[(0-0)GH79]|	1			0.666666666666667	0.0666666666666667	0.8	0.0666666666666667
b20	b20.a1	jgi|Pycsa1|1590027|[(0-0)GH35_2]|3.2.1.23|3.2.1.23|3.2.1.23|3.2.1.23|3.2.1.23|KOG0496|Beta-galactosidase|	1		0.0526315789473684	0.631578947368421	0.105263157894737	0.736842105263158	0.0526315789473684
b21	b21.a1	jgi|Pycsa1|1579336|[(1-24)SIGN][(28-424)GH5_9]|3.2.1.58|	1		0.555555555555556	1	0.444444444444444	0.777777777777778	0.111111111111111
b22	b22.a1	jgi|Pycsa1|1586920|[(1-19)SIGN][(20-172)X95][(179-552)GH20]|3.2.1.52|3.2.1.52|3.2.1.52|3.2.1.52|3.2.1.52|KOG2499|Beta-N-acetylhexosaminidase|	1		0.0625	0.875	0.0625	0.8125	0.125
b22	b22.a2	jgi|Pycsa1|1586923|[(1-18)SIGN][(19-171)X95][(178-550)GH20]|3.2.1.52|3.2.1.52|3.2.1.52|3.2.1.52|3.2.1.52|KOG2499|Beta-N-acetylhexosaminidase|	1			0.153846153846154		0.230769230769231
b23	b23.a1	jgi|Pycsa1|1567160|[(0-0)GH95]|	1		0.05	0.75	0.05	0.55	0.05
b24	b24.a1	jgi|Pycsa1|1558729|KOG1721|FOG: Zn-finger|	1			1.625	0.125	1
b25	b25.a1	jgi|Pycsa1|1562796|3.4.14.9|	1			0.722222222222222		0.555555555555556
b26	b26.a1	jgi|Pycsa1|1559723|[(0-0)GH31]|3.2.1.20|3.2.1.20|KOG1065|Maltase glucoamylase and related hydrolases. glycosyl hydrolase family 31|	1		0.0645161290322581	0.354838709677419	0.032258064516129	0.354838709677419
b27	b27.a1	jgi|Pycsa1|502114|	1			3	0.25	2.25
b27	b27.a2	jgi|Pycsa1|1674851|	1			0.6
b28	b28.a1	jgi|Pycsa1|1695354|[(0-0)GH43_B]|	1			3.33333333333333		2.66666666666667
b29	b29.a1	jgi|Pycsa1|1572980|	1		0.3	0.6		0.7	0.1
b30	b30.a1	jgi|Pycsa1|1589244|[(0-0)GH27]|3.2.1.22|3.2.1.22|3.2.1.22|3.2.1.22|KOG2366|Alpha-D-galactosidase (melibiase)|	1		0.0833333333333333	0.833333333333333	0.166666666666667	0.666666666666667	0.166666666666667
b31	b31.a1	jgi|Pycsa1|1537322|[(0-0)GH3]|	1		0.0625	0.5625	0.0625	0.3125	0.125
b31	b31.a2	jgi|Pycsa1|1598628|[(0-0)CBM1][(0-0)GH3]|3.2.1.21|3.2.1.21|3.2.1.21|	1		0.105263157894737	0.157894736842105	0.0526315789473684	0.0526315789473684	0.0526315789473684
b32	b32.a1	jgi|Pycsa1|1588246|[(0-0)GH13_32][(0-0)CBM20]|3.2.1.1|KOG2212|Alpha-amylase|	1			1.22222222222222		0.666666666666667
b33	b33.a1	jgi|Pycsa1|1586203|3.1.1.7|KOG4389|Acetylcholinesterase/Butyrylcholinesterase|	1		0.105263157894737	0.526315789473684		0.526315789473684	0.0526315789473684
b34	b34.a1	jgi|Pycsa1|1592699|3.4.23.25|KOG1339|Aspartyl protease|	1		0.0526315789473684	0.578947368421053	0.0526315789473684	0.421052631578947	0.0526315789473684
b35	b35.a1	jgi|Pycsa1|1590841|[(0-0)GH55]|	1		0.142857142857143	0.642857142857143	0.0714285714285714	0.571428571428571	0.142857142857143
b36	b36.a1	jgi|Pycsa1|1672751|[(1-19)SIGN][(20-203)AA8][(204-229)UNK][(230-769)AA3_1]|1.1.99.1|KOG1238|Glucose dehydrogenase/choline dehydrogenase/mandelonitrile lyase (GMC oxidoreductase family)|	1		0.307692307692308	0.615384615384615	0.307692307692308	0.307692307692308	0.0769230769230769
b37	b37.a1	jgi|Pycsa1|1571187|[(1-27)SIGN][(28-57)UNK][(58-339)GH18_dist]|	1		0.142857142857143	0.714285714285714	0.285714285714286	0.428571428571429	0.142857142857143
b38	b38.a1	jgi|Pycsa1|1609201|[(0-0)GH47]|3.2.1.113|KOG2431|1. 2-alpha-mannosidase|	1			0.588235294117647		0.529411764705882	0.0588235294117647
b39	b39.a1	jgi|Pycsa1|1664834|[(0-0)GH2_Mnd2]|3.2.1.25|KOG2230|Predicted beta-mannosidase|	1		0.0625	0.4375	0.125	0.3125	0.0625
b40	b40.a1	jgi|Pycsa1|1710073|3.1.1.1|KOG1516|Carboxylesterase and related proteins|	1	0.0909090909090909	0.363636363636364	0.636363636363636	0.363636363636364	0.363636363636364	0.0909090909090909
b41	b41.a1	jgi|Pycsa1|1602760|3.4.14.9|	1		0.0555555555555556	0.444444444444444	0.111111111111111	0.333333333333333	0.0555555555555556
b42	b42.a1	jgi|Pycsa1|1574363|[(0-0)AA3_2]|1.1.99.1|KOG1238|Glucose dehydrogenase/choline dehydrogenase/mandelonitrile lyase (GMC oxidoreductase family)|	1	0.0666666666666667	0.2	0.466666666666667	0.133333333333333	0.2	0.2
b43	b43.a1	jgi|Pycsa1|1677054|3.4.16.6|KOG1282|Serine carboxypeptidases (lysosomal cathepsin A)|KOG1282|Serine carboxypeptidases (lysosomal cathepsin A)|	1		0.0666666666666667	0.266666666666667	0.133333333333333	0.2	0.0666666666666667
b44	b44.a1	jgi|Pycsa1|1738933|[(0-0)GH28_rgl]|	1		0.4	0.5	0.2	0.4	0.2
b45	b45.a1	jgi|Pycsa1|1561925|[(0-0)GH79]|	1		0.5	0.5	0.375	0.5	0.25
b46	b46.a1	jgi|Pycsa1|1721886|[(0-0)GH74]|	1		0.0909090909090909	0.272727272727273	0.136363636363636	0.227272727272727	0.0454545454545455
b47	b47.a1	jgi|Pycsa1|1560782|[(1-20)SIGN][(21-55)CBM1][(56-87)LNK][(88-382)GH10_5]|	1		0.214285714285714	0.142857142857143	0.142857142857143	0.142857142857143	0.142857142857143
b48	b48.a1	jgi|Pycsa1|1600918|[(0-0)GH18][(0-0)CBM5]|3.2.1.14|KOG2806|Chitinase|	1		0.181818181818182	0.272727272727273	0.272727272727273	0.272727272727273	0.181818181818182
b48	b48.a2	jgi|Pycsa1|1672749|[(0-0)GH18][(0-0)CBM5]|3.2.1.14|KOG2806|Chitinase|	1		0.142857142857143	0.214285714285714	0.142857142857143	0.214285714285714	0.142857142857143
b49	b49.a1	jgi|Pycsa1|1565342|[(0-0)GH72][(0-0)CBM43_b]|KOG4719|Nuclear pore complex protein|KOG4719|Nuclear pore complex protein|	1	0.142857142857143	0.285714285714286	0.714285714285714		0.428571428571429	0.285714285714286
b50	b50.a1	jgi|Pycsa1|1608349|3.4.16.5|KOG1282|Serine carboxypeptidases (lysosomal cathepsin A)|KOG1282|Serine carboxypeptidases (lysosomal cathepsin A)|	1		0.222222222222222	0.555555555555556		0.555555555555556
b51	b51.a1	jgi|Pycsa1|1585887|	1		0.0434782608695652	0.304347826086957		0.260869565217391	0.0434782608695652
b52	b52.a1	jgi|Pycsa1|1705196|[(0-0)GH31]|3.2.1.20|3.2.1.20|KOG1065|Maltase glucoamylase and related hydrolases. glycosyl hydrolase family 31|	1			0.304347826086957	0.0434782608695652	0.260869565217391	0.0434782608695652
b53	b53.a1	jgi|Pycsa1|1680487|[(0-0)GH115]|	1		0.0277777777777778	0.166666666666667	0.0277777777777778	0.111111111111111	0.0555555555555556
b54	b54.a1	jgi|Pycsa1|1590513|3.4.-.-|3.4.-.-|KOG2182|Hydrolytic enzymes of the alpha/beta hydrolase fold|KOG2182|Hydrolytic enzymes of the alpha/beta hydrolase fold|	1		0.111111111111111	0.333333333333333		0.333333333333333
b55	b55.a1	jgi|Pycsa1|1653985|[(0-0)GH18]|3.2.1.14|KOG2806|Chitinase|	1		0.222222222222222	0.555555555555556	0.111111111111111	0.333333333333333	0.222222222222222
b56	b56.a1	jgi|Pycsa1|1675320|[(1-18)SIGN][(19-29)UNK][(30-233)GH25]|	1			1.25	0.25	0.75	0.25
b57	b57.a1	jgi|Pycsa1|1677842|	1		0.25	1.75	0.25	0.75
b58	b58.a1	jgi|Pycsa1|1672345|[(1-19)SIGN][(20-55)CBM1][(56-92)UNK][(93-444)GH5_7]|KOG1216|von Willebrand factor and related coagulation proteins|KOG1216|von Willebrand factor and related coagulation proteins|	1		0.5	1	0.25	0.5	0.25
b59	b59.a1	jgi|Pycsa1|1636006|	1			0.409090909090909		0.181818181818182
b60	b60.a1	jgi|Pycsa1|1749163|3.4.14.9|	1		0.0625	0.3125	0.0625	0.25	0.0625
b61	b61.a1	jgi|Pycsa1|1608570|	1			1.14285714285714		0.571428571428571
b62	b62.a1	jgi|Pycsa1|1718525|KOG4297|C-type lectin|KOG4297|C-type lectin|	1		0.2	0.6	0.2	0.8	0.4
b63	b63.a1	jgi|Pycsa1|1648421|[(0-0)AA3_4]|	1			0.0666666666666667	0.1	0.1	0.1
b64	b64.a1	jgi|Pycsa1|620905|[(0-0)GH43_F][(0-0)CBM35]|	1		0.0625	0.3125	0.0625	0.25
b65	b65.a1	jgi|Pycsa1|1585331|	1		0.0769230769230769	0.461538461538462	0.0769230769230769	0.153846153846154	0.0769230769230769
b66	b66.a1	jgi|Pycsa1|1566079|	1		0.111111111111111	0.333333333333333	0.111111111111111	0.111111111111111	0.111111111111111
b67	b67.a1	jgi|Pycsa1|1675136|	1			0.0967741935483871	0.032258064516129	0.129032258064516	0.0967741935483871
b68	b68.a1	jgi|Pycsa1|1612276|	1			0.384615384615385		0.384615384615385	0.0769230769230769
b69	b69.a1	jgi|Pycsa1|1547540|	1		0.5	1	0.25	0.5
b70	b70.a1	jgi|Pycsa1|1677049|3.4.16.6|KOG1282|Serine carboxypeptidases (lysosomal cathepsin A)|KOG1282|Serine carboxypeptidases (lysosomal cathepsin A)|	1	0.05		0.15		0.05	0.05
b71	b71.a1	jgi|Pycsa1|1611075|[(1-18)SIGN][(19-386)CE8]|	1		0.0833333333333333	0.416666666666667	0.0833333333333333	0.25
b72	b72.a1	jgi|Pycsa1|1588252|[(0-0)GH16_fun2]|	1		0.0666666666666667	0.266666666666667		0.333333333333333
b73	b73.a1	jgi|Pycsa1|1567787|[(1-20)SIGN][(21-56)CBM1][(57-94)UNK][(95-451)GH6_3]|	1		0.181818181818182	0.363636363636364	0.0909090909090909	0.181818181818182	0.0909090909090909
b74	b74.a1	jgi|Pycsa1|1547658|	1			0.5		0.5
b75	b75.a1	jgi|Pycsa1|1192565|	1			0.833333333333333		0.833333333333333
b76	b76.a1	jgi|Pycsa1|1577052|[(0-0)GH3]|3.2.1.21|3.2.1.21|3.2.1.21|	1		0.037037037037037	0.185185185185185	0.037037037037037	0.111111111111111
b77	b77.a1	jgi|Pycsa1|1755702|[(0-0)GH78]|	1		0.0714285714285714	0.428571428571429		0.214285714285714
b78	b78.a1	jgi|Pycsa1|1000963|	1		0.166666666666667	0.166666666666667	0.166666666666667	0.0833333333333333	0.0833333333333333
b79	b79.a1	jgi|Pycsa1|1612129|3.4.23.5|KOG1339|Aspartyl protease|	1	0.25	0.25	0.75		0.75
b80	b80.a1	jgi|Pycsa1|1538639|KOG1745|Histones H3 and H4|	4		1		0.333333333333333
b81	b81.a1	jgi|Pycsa1|1589034|KOG1516|Carboxylesterase and related proteins|	1		0.0384615384615385	0.115384615384615		0.153846153846154	0.0384615384615385
b82	b82.a1	jgi|Pycsa1|1599824|	1		0.333333333333333	1.33333333333333		1
b83	b83.a1	jgi|Pycsa1|1680425|	1		0.0526315789473684	0.210526315789474		0.157894736842105
b84	b84.a1	jgi|Pycsa1|1571675|[(0-0)GH12]|	1			0.6	0.4	0.4	0.2
b85	b85.a1	jgi|Pycsa1|12062|3.4.23.3|KOG1339|Aspartyl protease|	1			0.571428571428571	0.142857142857143	0.428571428571429
b86	b86.a1	jgi|Pycsa1|1577230|[(0-0)GH28_rgx]|	1			0.375		0.1875
b87	b87.a1	jgi|Pycsa1|1668791|KOG0676|Actin and related proteins|	1		0.142857142857143	0.142857142857143	0.0714285714285714	0.142857142857143	0.0714285714285714
b88	b88.a1	jgi|Pycsa1|1676339|	1		0.0909090909090909	0.181818181818182	0.0909090909090909	0.181818181818182
b88	b88.a2	jgi|Pycsa1|1592328|	1		0.142857142857143	0.142857142857143		0.142857142857143
b89	b89.a1	jgi|Pycsa1|1610208|3.4.16.-|KOG1282|Serine carboxypeptidases (lysosomal cathepsin A)|KOG1282|Serine carboxypeptidases (lysosomal cathepsin A)|	1			0.235294117647059		0.235294117647059
b90	b90.a1	jgi|Pycsa1|1586161|	1			0.25	0.0625	0.1875
b91	b91.a1	jgi|Pycsa1|1615309|[(0-0)GH16_fun2]|	1		0.0625	0.3125		0.125
b92	b92.a1	jgi|Pycsa1|1610181|[(1-19)SIGN][(20-55)CBM1][(56-82)UNK][(83-400)GH10]|	1			0.307692307692308		0.153846153846154	0.0769230769230769
b92	b92.a2	jgi|Pycsa1|1589823|[(1-19)SIGN][(20-55)CBM1][(56-79)UNK][(80-394)GH10]|	1			0.3		0.1
b93	b93.a1	jgi|Pycsa1|1592250|	1			0.230769230769231	0.0769230769230769	0.230769230769231	0.0769230769230769
b94	b94.a1	jgi|Pycsa1|1565370|[(0-0)CE4]|KOG0845|Nuclear pore complex. Nup98 component (sc Nup145/Nup100/Nup116)|KOG0845|Nuclear pore complex. Nup98 component (sc Nup145/Nup100/Nup116)|	1		0.125	0.375	0.25	0.25
b95	b95.a1	jgi|Pycsa1|1577721|[(0-0)CE8]|	1		0.166666666666667	0.666666666666667		0.5
b96	b96.a1	jgi|Pycsa1|1637500|3.4.23.18|KOG1339|Aspartyl protease|	1		0.222222222222222	0.444444444444444	0.111111111111111	0.111111111111111
b97	b97.a1	jgi|Pycsa1|1603355|[(0-0)GH32][(0-0)X101]|3.2.1.26|3.2.1.26|KOG0228|Beta-fructofuranosidase (invertase)|	1			0.444444444444444		0.333333333333333
b98	b98.a1	jgi|Pycsa1|1611547|[(0-0)GH5_9]|3.2.1.58|	1		0.153846153846154	0.153846153846154	0.0769230769230769	0.0769230769230769	0.0769230769230769
b99	b99.a1	jgi|Pycsa1|1565060|KOG0379|Kelch repeat-containing proteins|	1			0.117647058823529		0.0882352941176471
c100	c100.a1	jgi|Pycsa1|790266|3.4.21.48|KOG1153|Subtilisin-related protease/Vacuolar protease B|	1		0.333333333333333	0.166666666666667	0.333333333333333	0.166666666666667	0.166666666666667
c101	c101.a1	jgi|Pycsa1|1561162|KOG3467|Histone H4|	4		0.428571428571429		0.142857142857143
c102	c102.a1	jgi|Pycsa1|1721241|[(0-0)GH92]|	1			0.214285714285714		0.285714285714286
c103	c103.a1	jgi|Pycsa1|1588022|	1		0.0588235294117647	0.235294117647059		0.117647058823529
c104	c104.a1	jgi|Pycsa1|1577270|	1		0.285714285714286	0.285714285714286	0.142857142857143	0.285714285714286
c105	c105.a1	jgi|Pycsa1|1615498|3.1.27.1|KOG1642|Ribonuclease. T2 family|	1			0.285714285714286		0.214285714285714
c106	c106.a1	jgi|Pycsa1|1607820|6.3.2.-|6.3.2.-|KOG1282|Serine carboxypeptidases (lysosomal cathepsin A)|KOG1282|Serine carboxypeptidases (lysosomal cathepsin A)|	1			0.0625	0.0625	0.1875	0.0625
c107	c107.a1	jgi|Pycsa1|1581796|3.1.1.-|3.1.1.-|3.1.1.-|KOG4569|Predicted lipase|	1		0.142857142857143	0.285714285714286		0.285714285714286	0.142857142857143
c108	c108.a1	jgi|Pycsa1|1672687|	1		0.08	0.08	0.04	0.04
c109	c109.a1	jgi|Pycsa1|1674301|3.1.1.1|KOG4389|Acetylcholinesterase/Butyrylcholinesterase|	1		0.0625	0.1875	0.125
c110	c110.a1	jgi|Pycsa1|1590088|[(0-0)GH37]|3.2.1.28|KOG0602|Neutral trehalase|	1		0.0434782608695652	0.173913043478261
c111	c111.a1	jgi|Pycsa1|1428239|[(1-20)SIGN][(21-34)UNK][(35-403)GH88]|	1		0.0909090909090909	0.272727272727273		0.181818181818182
c112	c112.a1	jgi|Pycsa1|1601936|[(0-0)AA3_2]|1.1.99.1|KOG1238|Glucose dehydrogenase/choline dehydrogenase/mandelonitrile lyase (GMC oxidoreductase family)|	1			0.1875		0.1875
c113	c113.a1	jgi|Pycsa1|1589678|	1			0.75		0.5
c114	c114.a1	jgi|Pycsa1|1610761|[(0-0)CBM18][(0-0)GH16_1]|3.2.1.73|	1		0.142857142857143	0.285714285714286	0.142857142857143	0.142857142857143
c115	c115.a1	jgi|Pycsa1|212359|	1		0.166666666666667	0.166666666666667		0.333333333333333	0.166666666666667
c116	c116.a1	jgi|Pycsa1|1631901|[(0-0)GH18][(0-0)CBM5]|3.2.1.14|KOG4701|Chitinase|	1		0.0526315789473684	0.157894736842105		0.0526315789473684
c117	c117.a1	jgi|Pycsa1|1581112|	1			0.25		0.0625
c118	c118.a1	jgi|Pycsa1|1701524|KOG3619|Adenylate/guanylate cyclase|	1			0.0952380952380952		0.142857142857143
c119	c119.a1	jgi|Pycsa1|1755743|[(1-27)SIGN][(28-340)GH18_14][(345-394)CBM5][(395-417)UNK][(418-468)CBM5][(469-495)UNK]|3.2.1.14|KOG4701|Chitinase|	1		0.125	0.375			0.125
c120	c120.a1	jgi|Pycsa1|1679445|[(0-0)GH10]|	1			0.2		0.3
c121	c121.a1	jgi|Pycsa1|114001|3.1.3.5|3.1.3.5|3.1.3.5|	1			0.75		0.5
c122	c122.a1	jgi|Pycsa1|1645517|[(0-0)GH17_gs]|	1			0.666666666666667		1
c123	c123.a1	jgi|Pycsa1|1602212|	1			0.222222222222222		0.111111111111111
c124	c124.a1	jgi|Pycsa1|1562230|[(1-21)SIGN][(22-79)UNK][(80-345)CE16]|	1			0.375		0.25
c125	c125.a1	jgi|Pycsa1|1594299|	1			0.25		0.25
c126	c126.a1	jgi|Pycsa1|1671724|3.4.14.9|	1		0.142857142857143	0.0714285714285714	0.0714285714285714
c127	c127.a1	jgi|Pycsa1|1617673|	1			0.1875		0.0625
c128	c128.a1	jgi|Pycsa1|1652042|KOG0052|Translation elongation factor EF-1 alpha/Tu|	1		0.133333333333333			0.0666666666666667	0.0666666666666667
c129	c129.a1	jgi|Pycsa1|1609963|[(0-0)PL14_5]|	1			0.111111111111111	0.111111111111111	0.222222222222222
c130	c130.a1	jgi|Pycsa1|1589586|	1			0.166666666666667		0.166666666666667
c131	c131.a1	jgi|Pycsa1|1562112|3.4.16.5|KOG1282|Serine carboxypeptidases (lysosomal cathepsin A)|KOG1282|Serine carboxypeptidases (lysosomal cathepsin A)|	1		0.25			0.25
c132	c132.a1	jgi|Pycsa1|1597910|	1			0.1		0.2	0.1
c133	c133.a1	jgi|Pycsa1|1576418|[(0-0)GH17]|3.2.1.58|	1			0.125		0.375
c134	c134.a1	jgi|Pycsa1|1678350|3.4.23.5|KOG1339|Aspartyl protease|	1			0.142857142857143		0.285714285714286
c135	c135.a1	jgi|Pycsa1|1677933|[(0-0)CBM1][(0-0)CE1]|	1		0.4	0.2		0.2
c136	c136.a1	jgi|Pycsa1|1610420|3.1.27.1|KOG1642|Ribonuclease. T2 family|	1			0.428571428571429		0.142857142857143
c137	c137.a1	jgi|Pycsa1|1593425|[(1-20)SIGN][(21-469)GH5_15]|3.2.1.58|	1			0.181818181818182		0.181818181818182
c138	c138.a1	jgi|Pycsa1|1588377|[(1-23)SIGN][(24-54)UNK][(55-505)GH125]|	1			0.25		0.0833333333333333
c139	c139.a1	jgi|Pycsa1|112698|3.1.3.5|3.1.3.5|3.1.3.5|	1			0.375		0.125
c140	c140.a1	jgi|Pycsa1|1639615|[(0-0)GH16_fun2]|	1			0.0384615384615385		0.0769230769230769
c141	c141.a1	jgi|Pycsa1|1127567|[(1-19)SIGN][(22-317)GH16_fun1]|	1			0.333333333333333		0.166666666666667
c142	c142.a1	jgi|Pycsa1|1572306|	1			0.25
c143	c143.a1	jgi|Pycsa1|1719016|[(0-0)GH30]|	1		0.25	0.125
c144	c144.a1	jgi|Pycsa1|1562720|	1		0.333333333333333			0.666666666666667
c145	c145.a1	jgi|Pycsa1|1615445|	1			0.181818181818182		0.0909090909090909
c146	c146.a1	jgi|Pycsa1|1571777|	1			0.0526315789473684		0.105263157894737
c147	c147.a1	jgi|Pycsa1|1590768|[(0-0)GH28_pgx]|3.2.1.67|	1			0.142857142857143		0.285714285714286
c148	c148.a1	jgi|Pycsa1|1575571|	1			0.0666666666666667		0.133333333333333
c149	c149.a1	jgi|Pycsa1|1605422|3.1.3.2|3.1.3.2|KOG1382|Multiple inositol polyphosphate phosphatase|	1			0.2		0.1
c150	c150.a1	jgi|Pycsa1|385598|[(1-17)SIGN][(18-229)AA9]|	1			0.5		0.25
c151	c151.a1	jgi|Pycsa1|1594975|[(0-0)GH92]|	1			0.08		0.04
c152	c152.a1	jgi|Pycsa1|1577318|	1			0.5		0.25
c153	c153.a1	jgi|Pycsa1|1734119|6.3.5.-|6.3.5.-|KOG1211|Amidases|	1			0.0588235294117647		0.117647058823529
c154	c154.a1	jgi|Pycsa1|187563|	1			2		1
c155	c155.a1	jgi|Pycsa1|1574209|KOG4419|5' nucleotidase|	1			0.117647058823529		0.0588235294117647
c156	c156.a1	jgi|Pycsa1|1667469|3.1.1.1|KOG1516|Carboxylesterase and related proteins|	1		0.0588235294117647	0.117647058823529
c157	c157.a1	jgi|Pycsa1|1601758|KOG0907|Thioredoxin|	1			0.4		0.2
c158	c158.a1	jgi|Pycsa1|1590375|	1			2		1
c159	c159.a1	jgi|Pycsa1|1593698|[(0-0)GH31]|3.2.1.20|3.2.1.20|KOG1065|Maltase glucoamylase and related hydrolases. glycosyl hydrolase family 31|	1			0.08		0.04
c160	c160.a1	jgi|Pycsa1|1596128|3.4.16.6|KOG1282|Serine carboxypeptidases (lysosomal cathepsin A)|KOG1282|Serine carboxypeptidases (lysosomal cathepsin A)|	1			0.166666666666667		0.0833333333333333
c161	c161.a1	jgi|Pycsa1|83628|[(0-0)GH79]|	1		0.0666666666666667	0.0666666666666667
c162	c162.a1	jgi|Pycsa1|1610435|[(0-0)GH7]|	1		0.333333333333333
c163	c163.a1	jgi|Pycsa1|1615206|[(0-0)GH18]|3.2.1.14|KOG2806|Chitinase|	1			0.166666666666667
c164	c164.a1	jgi|Pycsa1|1600019|[(1-18)SIGN][(19-238)AA9]|	1		0.166666666666667	0.166666666666667
c165	c165.a1	jgi|Pycsa1|1542987|	1			0.125		0.125
c166	c166.a1	jgi|Pycsa1|1586934|	2			0.5		0.5
c167	c167.a1	jgi|Pycsa1|1575496|1.6.99.1|KOG0134|NADH:flavin oxidoreductase/12-oxophytodienoate reductase|KOG0134|NADH:flavin oxidoreductase/12-oxophytodienoate reductase|	1		0.0714285714285714	0.0714285714285714
c168	c168.a1	jgi|Pycsa1|1568994|3.4.16.2|KOG2182|Hydrolytic enzymes of the alpha/beta hydrolase fold|KOG2182|Hydrolytic enzymes of the alpha/beta hydrolase fold|	1			0.153846153846154
c169	c169.a1	jgi|Pycsa1|1562669|3.4.23.1|KOG1339|Aspartyl protease|	1					0.5
c170	c170.a1	jgi|Pycsa1|1581540|	1			0.333333333333333
c171	c171.a1	jgi|Pycsa1|1674106|[(1-20)SIGN][(21-55)CBM1][(56-78)LNK][(79-386)GH5_5]|	1			0.666666666666667
c172	c172.a1	jgi|Pycsa1|1561243|3.4.23.3|KOG1339|Aspartyl protease|	1			0.222222222222222
c173	c173.a1	jgi|Pycsa1|1581106|[(0-0)GH16_fun1]|KOG4157|beta-1.6-N-acetylglucosaminyltransferase. contains WSC domain|KOG4157|beta-1.6-N-acetylglucosaminyltransferase. contains WSC domain|	1			0.5
c174	c174.a1	jgi|Pycsa1|1594881|[(1-22)SIGN][(28-335)GH18_14][(336-377)LNK][(378-428)CBM5][(429-454)UNK]|3.2.1.14|KOG4701|Chitinase|	1			0.4

## Sheet: Compare spectra Lme1369 Q-Exa
Proteomics complementary data for Lme1369. Number of identified spectra in each condition (Maltose + Lignin and Lignin) at days 7 and 14 following the Q-Exactive analysis methods.
Group ID	Sub-group ID	Protein Description	Number of proteins	Day3_Maltose+Lignin	Day3_Lignin	Day7_Maltose+Lignin	Day7_Lignin	Day14_Maltose+Lignin	Day14_Lignin
a1	a1.a1	jgi|Tramen1|932922|fgenesh1_pg.10_#_243|3.2.1.91|METABOLIC|IPR001722|Glycoside hydrolase, family 7|IPR001722|Glycoside hydrolase, family 7|IPR013320|Concanavalin A-like lectin/glucanase domain|GH7||	1	7	303	71	246	74	32
a1	a1.a2	jgi|Tramen1|927797|e_gw1.58.16.1|3.2.1.91|METABOLIC|IPR001722|Glycoside hydrolase, family 7|IPR001722|Glycoside hydrolase, family 7|IPR013320|Concanavalin A-like lectin/glucanase domain|GH7||	1	3	37	34	40	33	8
a1	a1.a3	jgi|Tramen1|536730|CE536729_14175|3.2.1.91|METABOLIC|IPR001722|Glycoside hydrolase, family 7|IPR001722|Glycoside hydrolase, family 7|IPR013320|Concanavalin A-like lectin/glucanase domain|GH7||	1	1	33	8	18	11	5
a2	a2.a1	jgi|Tramen1|761930|CE761929_14260|IPR014870|Domain of unknown function DUF1793|IPR008928|Six-hairpin glycosidase-like|	1	15	140	206	172	128	18
a2	a2.a2	jgi|Tramen1|762240|CE762239_7640|IPR014870|Domain of unknown function DUF1793|IPR008928|Six-hairpin glycosidase-like|	1	0	4	6	5	2	0
a3	a3.a1	jgi|Tramen1|910254|e_gw1.6.982.1|3.2.1.3|METABOLIC|IPR002044|Carbohydrate binding module family 20|IPR011613|Glycoside hydrolase family 15|IPR008291|Glucoamylase, starch-binding|IPR000165|Glucoamylase|IPR002044|Carbohydrate binding module family 20|IPR002044|Carbohydrate binding module family 20|IPR008928|Six-hairpin glycosidase-like|IPR013784|Carbohydrate-binding-like fold|GH15-CBM20||	1	13	51	210	56	113	7
a4	a4.a1	jgi|Tramen1|911702|e_gw1.8.435.1|3.2.1.58|METABOLIC|\N|\N|IPR011050|Pectin lyase fold/virulence factor|GH55||	1	3	57	156	66	97	3
a5	a5.a1	jgi|Tramen1|1053769|gm1.4981_g|IPR002889|Carbohydrate-binding WSC|IPR018535|Domain of unknown function DUF1996|IPR002889|Carbohydrate-binding WSC|IPR013994|Carbohydrate-binding WSC, subgroup|	1	7	74	120	60	59	2
a5	a5.a2	jgi|Tramen1|1044932|fgenesh1_pm.12_#_185|IPR002889|Carbohydrate-binding WSC|IPR018535|Domain of unknown function DUF1996|IPR002889|Carbohydrate-binding WSC|IPR013994|Carbohydrate-binding WSC, subgroup|	1	0	6	9	4	5	0
a6	a6.a1	jgi|Tramen1|903895|e_gw1.1.702.1|3.2.1.58|METABOLIC|\N|\N|IPR011050|Pectin lyase fold/virulence factor|GH55||	1	5	56	81	60	53	4
a7	a7.a1	jgi|Tramen1|925293|e_gw1.40.151.1|3.2.1.59|\N|IPR005197|Glycoside hydrolase, family 71|GH71|fragment N-term;|	1	4	73	53	81	34	7
a8	a8.a1	jgi|Tramen1|459662|CE459661_1801|	1	1	47	59	63	40	6
a9	a9.a1	jgi|Tramen1|945625|fgenesh1_kg.2_#_1950_#_TRINITY_DN3039_c1_g2_i2|IPR001938|Thaumatin|IPR001938|Thaumatin|IPR001938|Thaumatin|IPR001938|Thaumatin|IPR001938|Thaumatin|GH152||	1	0	31	40	48	36	2
a9	a9.a2	jgi|Tramen1|210347|CE210346_6263|IPR001938|Thaumatin|IPR001938|Thaumatin|IPR001938|Thaumatin|IPR001938|Thaumatin|IPR001938|Thaumatin|IPR001938|Thaumatin|GH152||	1	0	7	19	13	18	0
b10	b10.a1	jgi|Tramen1|1055153|gm1.6365_g|IPR012939|Glycosyl hydrolase family 92|IPR008928|Six-hairpin glycosidase-like|IPR005887|Alpha-1,2-mannosidase, putative|GH92||	1	0	22	68	31	50	1
b11	b11.a1	jgi|Tramen1|1041408|fgenesh1_pm.1_#_79|IPR002018|Carboxylesterase, type B|IPR019826|Carboxylesterase type B, active site|IPR029058|Alpha/Beta hydrolase fold|	1	2	42	24	73	16	3
b12	b12.a1	jgi|Tramen1|908445|e_gw1.5.711.1|IPR000254|Cellulose-binding domain, fungal|IPR000254|Cellulose-binding domain, fungal|\N|\N|IPR000254|Cellulose-binding domain, fungal|GH74-CBM1|fragment C-term;|	1	0	62	21	55	16	4
b13	b13.a1	jgi|Tramen1|1044554|fgenesh1_pm.10_#_214|1.10.3.3|METABOLIC|IPR001117|Multicopper oxidase, type 1|IPR011706|Multicopper oxidase, type 2|IPR011707|Multicopper oxidase, type 3|IPR002355|Multicopper oxidase, copper-binding site|IPR008972|Cupredoxin|AA1_1||	1	0	10	26	16	22	0
b13	b13.a2	jgi|Tramen1|924031|e_gw1.35.114.1|1.10.3.3|METABOLIC|IPR001117|Multicopper oxidase, type 1|IPR011706|Multicopper oxidase, type 2|IPR011707|Multicopper oxidase, type 3|IPR002355|Multicopper oxidase, copper-binding site|IPR008972|Cupredoxin|AA1_1||	1	1	5	36	6	22	0
b14	b14.a1	jgi|Tramen1|916190|e_gw1.15.98.1|1.1.99.18|\N|IPR000172|Glucose-methanol-choline oxidoreductase, N-terminal|IPR007867|Glucose-methanol-choline oxidoreductase, C-terminal|IPR000172|Glucose-methanol-choline oxidoreductase, N-terminal|IPR000172|Glucose-methanol-choline oxidoreductase, N-terminal|\N|\N|\N|\N|\N|\N|AA8-AA3_1||	1	0	47	15	60	12	7
b15	b15.a1	jgi|Tramen1|962822|fgenesh1_kg.6_#_1680_#_TRINITY_DN2405_c0_g1_i1|3.2.1.23|METABOLIC|IPR001944|Glycoside hydrolase, family 35|IPR018954|Beta-galactosidase, domain 2|IPR025972|Beta-galactosidase, domain 3|IPR025300|Beta-galactosidase jelly roll domain|IPR001944|Glycoside hydrolase, family 35|IPR018954|Beta-galactosidase, domain 2|IPR025972|Beta-galactosidase, domain 3|IPR008979|Galactose-binding d…	1	1	21	39	24	37	1
b15	b15.a2	jgi|Tramen1|1057549|gm1.8761_g|3.2.1.23|METABOLIC|IPR001944|Glycoside hydrolase, family 35|IPR018954|Beta-galactosidase, domain 2|IPR025972|Beta-galactosidase, domain 3|IPR025300|Beta-galactosidase jelly roll domain|IPR001944|Glycoside hydrolase, family 35|\N|\N|IPR018954|Beta-galactosidase, domain 2|IPR025972|Beta-galactosidase, domain 3|IPR008979|Galactose-binding domain-like|\N|\N|IPR017853|Gl…	1	0	5	5	4	5	1
b16	b16.a1	jgi|Tramen1|1056961|gm1.8173_g|IPR000250|Peptidase G1|IPR000250|Peptidase G1|IPR013320|Concanavalin A-like lectin/glucanase domain|	1	0	18	64	24	25	1
b17	b17.a1	jgi|Tramen1|909754|e_gw1.6.167.1|3.2.1.45|METABOLIC|IPR001139|Glycoside hydrolase, family 30|IPR017853|Glycoside hydrolase superfamily|GH30_3||	1	0	19	45	29	32	4
b18	b18.a1	jgi|Tramen1|1050431|gm1.1643_g|3.2.1.8|\N|IPR001000|Glycoside hydrolase, family 10|IPR000254|Cellulose-binding domain, fungal|IPR001000|Glycoside hydrolase, family 10|IPR000254|Cellulose-binding domain, fungal|\N|\N|IPR000254|Cellulose-binding domain, fungal|IPR000254|Cellulose-binding domain, fungal|IPR001000|Glycoside hydrolase, family 10|IPR017853|Glycoside hydrolase superfamily|IPR000254|Cell…	1	0	30	11	26	8	3
b18	b18.a2	jgi|Tramen1|438328|CE438327_6085|3.2.1.8|\N|IPR001000|Glycoside hydrolase, family 10|IPR000254|Cellulose-binding domain, fungal|IPR001000|Glycoside hydrolase, family 10|IPR000254|Cellulose-binding domain, fungal|\N|\N|IPR000254|Cellulose-binding domain, fungal|IPR000254|Cellulose-binding domain, fungal|IPR001000|Glycoside hydrolase, family 10|IPR017853|Glycoside hydrolase superfamily|IPR000254|Ce…	1	0	19	7	17	5	4
b19	b19.a1	jgi|Tramen1|920432|e_gw1.25.294.1|3.2.1.22|METABOLIC|IPR000111|Glycoside hydrolase, clan GH-D|IPR002241|Glycoside hydrolase, family 27|\N|\N|IPR017853|Glycoside hydrolase superfamily|GH27||	1	3	11	46	23	29	3
b20	b20.a1	jgi|Tramen1|271898|CE271897_2152|3.2.1.67|METABOLIC|IPR000743|Glycoside hydrolase, family 28|IPR000743|Glycoside hydrolase, family 28|IPR006626|Parallel beta-helix repeat|IPR011050|Pectin lyase fold/virulence factor|GH28||	1	0	23	35	27	24	1
b21	b21.a1	jgi|Tramen1|1059275|gm1.10487_g|IPR000757|Glycoside hydrolase, family 16|IPR013320|Concanavalin A-like lectin/glucanase domain|GH16||	1	4	11	47	14	30	3
b22	b22.a1	jgi|Tramen1|473590|CE473589_83153|3.4.16.6|\N|IPR001563|Peptidase S10, serine carboxypeptidase|IPR001563|Peptidase S10, serine carboxypeptidase|IPR018202|Peptidase S10, serine carboxypeptidase, active site|IPR029058|Alpha/Beta hydrolase fold|	1	0	7	28	12	21	1
b22	b22.a2	jgi|Tramen1|970552|fgenesh1_kg.8_#_2043_#_TRINITY_DN2774_c1_g1_i1|3.4.16.6|\N|IPR001563|Peptidase S10, serine carboxypeptidase|IPR001563|Peptidase S10, serine carboxypeptidase|IPR029058|Alpha/Beta hydrolase fold|	1	0	10	7	14	5	0
b22	b22.a3	jgi|Tramen1|959398|fgenesh1_kg.5_#_1864_#_TRINITY_DN3635_c1_g2_i4|3.4.16.6|\N|IPR001563|Peptidase S10, serine carboxypeptidase|IPR001563|Peptidase S10, serine carboxypeptidase|IPR018202|Peptidase S10, serine carboxypeptidase, active site|IPR029058|Alpha/Beta hydrolase fold|	1	0	2	8	3	8	1
b23	b23.a1	jgi|Tramen1|991746|fgenesh1_kg.16_#_2057_#_TRINITY_DN4489_c0_g1_i30|3.2.1.51|METABOLIC|IPR027414|Glycosyl hydrolase family, N-terminal domain|IPR016518|Alpha-L-fucosidase|IPR008928|Six-hairpin glycosidase-like|GH95||	1	2	14	39	20	20	0
b24	b24.a1	jgi|Tramen1|1017657|fgenesh1_kg.32_#_855_#_TRINITY_DN4805_c0_g1_i2|3.2.1.21|METABOLIC|IPR001764|Glycoside hydrolase, family 3, N-terminal|IPR002772|Glycoside hydrolase family 3 C-terminal domain|IPR026891|Fibronectin type III-like domain|IPR001764|Glycoside hydrolase, family 3, N-terminal|IPR017853|Glycoside hydrolase superfamily|IPR002772|Glycoside hydrolase family 3 C-terminal domain|GH3||	1	0	11	22	13	16	1
b24	b24.a2	jgi|Tramen1|1089960|MIX30046_5258_56|3.2.1.21|METABOLIC|IPR001764|Glycoside hydrolase, family 3, N-terminal|IPR002772|Glycoside hydrolase family 3 C-terminal domain|IPR026891|Fibronectin type III-like domain|IPR001764|Glycoside hydrolase, family 3, N-terminal|IPR017853|Glycoside hydrolase superfamily|IPR002772|Glycoside hydrolase family 3 C-terminal domain|GH3||	1	0	13	9	14	7	1
b25	b25.a1	jgi|Tramen1|453833|CE453832_622047|1.1.3.9|METABOLIC|IPR009880|Glyoxal oxidase, N-terminal|IPR015202|Domain of unknown function DUF1929|IPR011043|Galactose oxidase/kelch, beta-propeller|IPR014756|Immunoglobulin E-set|AA5_1||	1	0	12	33	20	25	0
b25	b25.a2	jgi|Tramen1|923081|e_gw1.32.82.1|IPR009880|Glyoxal oxidase, N-terminal|IPR015202|Domain of unknown function DUF1929|IPR011043|Galactose oxidase/kelch, beta-propeller|IPR014756|Immunoglobulin E-set|AA5_1||	1	0	5	16	10	10	0
b26	b26.a1	jgi|Tramen1|932960|fgenesh1_pg.11_#_35|3.2.1.59|\N|IPR002889|Carbohydrate-binding WSC|IPR009880|Glyoxal oxidase, N-terminal|IPR015202|Domain of unknown function DUF1929|IPR002889|Carbohydrate-binding WSC|IPR013994|Carbohydrate-binding WSC, subgroup|IPR011043|Galactose oxidase/kelch, beta-propeller|IPR014756|Immunoglobulin E-set|AA5_1||	1	0	4	49	10	24	0
b27	b27.a1	jgi|Tramen1|149032|CE149031_19407|3.2.1.14|METABOLIC|IPR001223|Glycoside hydrolase, family 18, catalytic domain|IPR003610|Carbohydrate-binding module family 5/12|IPR001579|Glycoside hydrolase, chitinase active site|IPR003610|Carbohydrate-binding module family 5/12|IPR011583|Chitinase II|IPR003610|Carbohydrate-binding module family 5/12|IPR017853|Glycoside hydrolase superfamily|IPR029070|Chitinase…	1	1	34	11	26	11	1
b28	b28.a1	jgi|Tramen1|909011|e_gw1.5.414.1|IPR004886|Glucanosyltransferase|IPR009571|Actin cortical patch SUR7/pH-response regulator PalI|IPR012946|X8 domain|IPR012946|X8 domain|IPR017853|Glycoside hydrolase superfamily|GH72-CBM43||	1	2	10	31	21	16	2
b29	b29.a1	jgi|Tramen1|648965|CE648964_54632|3.4.14.9|\N|IPR000209|Peptidase S8/S53 domain|IPR015366|Peptidase S53, propeptide|IPR023828|Peptidase S8, subtilisin, Ser-active site|IPR030400|Sedolisin domain|IPR015366|Peptidase S53, propeptide|IPR000209|Peptidase S8/S53 domain|IPR009020|Proteinase inhibitor, propeptide|	1	0	12	30	19	19	0
b30	b30.a1	jgi|Tramen1|910310|e_gw1.7.719.1|IPR006045|Cupin 1|IPR013096|Cupin 2, conserved barrel|IPR006045|Cupin 1|IPR011051|RmlC-like cupin domain|IPR017774|Bicupin, oxalate decarboxylase/oxidase|	1	0	6	38	8	27	1
b31	b31.a1	jgi|Tramen1|252873|CE252872_9929|3.2.1.14|METABOLIC|IPR001223|Glycoside hydrolase, family 18, catalytic domain|IPR001579|Glycoside hydrolase, chitinase active site|IPR017853|Glycoside hydrolase superfamily|GH18||	1	0	7	22	21	19	1
b32	b32.a1	jgi|Tramen1|919975|e_gw1.24.156.1|3.2.1.20|METABOLIC|IPR000322|Glycoside hydrolase family 31|IPR025887|Glycoside hydrolase family 31, N-terminal domain|IPR030459|Glycosyl hydrolases family 31, conserved site|\N|\N|IPR017853|Glycoside hydrolase superfamily|IPR011013|Galactose mutarotase-like domain|GH31||	1	0	16	21	15	18	0
b33	b33.a1	jgi|Tramen1|149160|CE149159_6218|3.2.1.1|METABOLIC|IPR006047|Glycosyl hydrolase, family 13, catalytic domain|IPR002044|Carbohydrate binding module family 20|IPR006048|Alpha-amylase, C-terminal all beta|IPR006046|Alpha amylase|IPR002044|Carbohydrate binding module family 20|IPR006048|Alpha-amylase, C-terminal all beta|IPR006589|Glycosyl hydrolase, family 13, subfamily, catalytic domain|IPR002044|C…	1	0	6	30	13	18	0
b34	b34.a1	jgi|Tramen1|912226|e_gw1.9.730.1|3.4.23.25|\N|IPR001461|Aspartic peptidase|IPR001461|Aspartic peptidase|IPR001969|Aspartic peptidase, active site|IPR021109|Aspartic peptidase domain|	1	0	6	28	11	20	1
b35	b35.a1	jgi|Tramen1|923647|e_gw1.34.113.1|3.2.1.52|METABOLIC|IPR015883|Glycoside hydrolase family 20, catalytic core|IPR029019|Beta-hexosaminidase, eukaryotic type, N-terminal|IPR025705|Beta-hexosaminidase|IPR025705|Beta-hexosaminidase|IPR017853|Glycoside hydrolase superfamily|IPR029018|Chitobiase/beta-hexosaminidase domain 2-like|GH20||	1	0	19	16	15	13	0
b36	b36.a1	jgi|Tramen1|46074|CE46073_3414|3.1.1.11|METABOLIC|IPR000070|Pectinesterase, catalytic|IPR018040|Pectinesterase, active site|IPR011050|Pectin lyase fold/virulence factor|CE8||	1	0	16	20	14	11	0
b37	b37.a1	jgi|Tramen1|910926|e_gw1.7.493.1|	1	0	14	14	20	12	0
b38	b38.a1	jgi|Tramen1|909147|e_gw1.5.41.1|IPR003159|Polysaccharide lyase family 8, central domain|IPR012970|Polysaccharide lyase 8, N-terminal alpha-helical|IPR008929|Chondroitin AC/alginate lyase|IPR011071|Polysaccharide lyase family 8-like, C-terminal|IPR011013|Galactose mutarotase-like domain|PL8_4||	1	2	16	14	15	9	3
b39	b39.a1	jgi|Tramen1|946666|fgenesh1_kg.2_#_2991_#_TRINITY_DN4200_c0_g1_i1|3.4.16.6|\N|IPR001563|Peptidase S10, serine carboxypeptidase|IPR001563|Peptidase S10, serine carboxypeptidase|IPR029058|Alpha/Beta hydrolase fold|	1	0	11	17	15	13	1
b40	b40.a1	jgi|Tramen1|571985|CE571984_4189|3.2.1.22|METABOLIC|IPR000111|Glycoside hydrolase, clan GH-D|IPR002241|Glycoside hydrolase, family 27|IPR000111|Glycoside hydrolase, clan GH-D|\N|\N|IPR017853|Glycoside hydrolase superfamily|GH27||	1	2	5	16	13	17	3
b41	b41.a1	jgi|Tramen1|915133|e_gw1.13.58.1|IPR000743|Glycoside hydrolase, family 28|IPR011050|Pectin lyase fold/virulence factor|GH28||	1	1	20	8	15	7	4
b42	b42.a1	jgi|Tramen1|932245|fgenesh1_pg.8_#_86|3.2.1.39|METABOLIC|IPR017853|Glycoside hydrolase superfamily|GH17||	1	1	12	15	11	12	1
b43	b43.a1	jgi|Tramen1|923735|e_gw1.34.80.1|3.2.1.28|METABOLIC|IPR001661|Glycoside hydrolase, family 37|IPR001661|Glycoside hydrolase, family 37|IPR018232|Glycoside hydrolase, family 37, conserved site|IPR008928|Six-hairpin glycosidase-like|GH37||	1	0	6	14	19	9	1
b44	b44.a1	jgi|Tramen1|534398|CE534397_113034|IPR012480|Heparinase II/III-like|IPR008929|Chondroitin AC/alginate lyase|	1	1	6	14	14	13	0
b45	b45.a1	jgi|Tramen1|925544|e_gw1.41.5.1|3.2.1.113|METABOLIC|IPR001382|Glycoside hydrolase, family 47|IPR001382|Glycoside hydrolase, family 47|IPR001382|Glycoside hydrolase, family 47|GH47||	1	1	12	11	8	13	0
b46	b46.a1	jgi|Tramen1|919050|e_gw1.21.219.1|3.2.1.67|METABOLIC|IPR000743|Glycoside hydrolase, family 28|IPR000743|Glycoside hydrolase, family 28|IPR006626|Parallel beta-helix repeat|IPR011050|Pectin lyase fold/virulence factor|GH28||	1	0	8	13	11	12	0
b47	b47.a1	jgi|Tramen1|913797|e_gw1.11.159.1|	1	1	3	22	7	11	0
b48	b48.a1	jgi|Tramen1|1043262|fgenesh1_pm.6_#_105|IPR005135|Endonuclease/exonuclease/phosphatase|IPR005135|Endonuclease/exonuclease/phosphatase|	1	1	6	19	7	8	1
b49	b49.a1	jgi|Tramen1|20836|CE20835_4344|IPR006710|Glycoside hydrolase, family 43|IPR005084|Carbohydrate binding module family 6|IPR008979|Galactose-binding domain-like|IPR023296|Glycosyl hydrolase, five-bladed beta-propellor domain|GH43-CBM35||	1	0	5	16	9	11	0
b50	b50.a1	jgi|Tramen1|915930|e_gw1.14.456.1|3.2.1.55|METABOLIC|IPR010720|Alpha-L-arabinofuranosidase, C-terminal|IPR010720|Alpha-L-arabinofuranosidase, C-terminal|IPR017853|Glycoside hydrolase superfamily|GH51||	1	0	8	14	9	9	0
b51	b51.a1	jgi|Tramen1|1049265|gm1.477_g|3.2.1.1|METABOLIC|IPR006047|Glycosyl hydrolase, family 13, catalytic domain|IPR015340|Alpha-amylase, domain of unknown function DUF1966, C-terminal|\N|\N|IPR006589|Glycosyl hydrolase, family 13, subfamily, catalytic domain|\N|\N|IPR017853|Glycoside hydrolase superfamily|GH13_1||	1	0	11	11	13	5	0
b52	b52.a1	jgi|Tramen1|996560|fgenesh1_kg.19_#_436_#_TRINITY_DN3740_c0_g1_i4|IPR005135|Endonuclease/exonuclease/phosphatase|IPR005135|Endonuclease/exonuclease/phosphatase|	1	0	5	14	4	15	0
b53	b53.a1	jgi|Tramen1|1050025|gm1.1237_g|3.2.1.4|METABOLIC|IPR005103|Glycoside hydrolase, family 61|AA9||	1	0	11	4	18	3	1
b54	b54.a1	jgi|Tramen1|1046069|fgenesh1_pm.21_#_75|IPR001087|GDSL lipase/esterase|IPR000254|Cellulose-binding domain, fungal|IPR000254|Cellulose-binding domain, fungal|IPR000254|Cellulose-binding domain, fungal|IPR000254|Cellulose-binding domain, fungal|IPR013830|SGNH hydrolase-type esterase domain|IPR000254|Cellulose-binding domain, fungal|CBM1-CE16||	1	1	25	1	7	2	1
b55	b55.a1	jgi|Tramen1|553163|CE553162_5504|IPR002594|Glycoside hydrolase, family 12|IPR013320|Concanavalin A-like lectin/glucanase domain|GH12||	1	0	6	7	15	7	2
b56	b56.a1	jgi|Tramen1|925617|e_gw1.42.206.1|3.2.1.58|METABOLIC|IPR001547|Glycoside hydrolase, family 5|IPR017853|Glycoside hydrolase superfamily|GH5_9||	1	0	7	11	9	8	0
b57	b57.a1	jgi|Tramen1|1051772|gm1.2984_g|IPR005629|Beta-glucan synthesis-associated, SKN1|IPR013320|Concanavalin A-like lectin/glucanase domain|GH16||	1	0	8	10	9	7	0
b58	b58.a1	jgi|Tramen1|1050433|gm1.1645_g|3.2.1.8|\N|IPR001000|Glycoside hydrolase, family 10|IPR000254|Cellulose-binding domain, fungal|IPR001000|Glycoside hydrolase, family 10|IPR000254|Cellulose-binding domain, fungal|\N|\N|IPR000254|Cellulose-binding domain, fungal|IPR000254|Cellulose-binding domain, fungal|IPR001000|Glycoside hydrolase, family 10|IPR017853|Glycoside hydrolase superfamily|IPR000254|Cell…	1	0	11	8	10	4	1
b59	b59.a1	jgi|Tramen1|906608|e_gw1.3.474.1|3.4.23.5|\N|IPR001461|Aspartic peptidase|IPR001461|Aspartic peptidase|IPR001969|Aspartic peptidase, active site|IPR021109|Aspartic peptidase domain|	1	0	6	19	5	4	0
b60	b60.a1	jgi|Tramen1|945672|fgenesh1_kg.2_#_1997_#_TRINITY_DN3166_c0_g1_i4|IPR002018|Carboxylesterase, type B|IPR019826|Carboxylesterase type B, active site|IPR029058|Alpha/Beta hydrolase fold|	1	0	10	8	7	7	1
b61	b61.a1	jgi|Tramen1|1043750|fgenesh1_pm.7_#_287|3.2.1.14|METABOLIC|IPR003610|Carbohydrate-binding module family 5/12|IPR001579|Glycoside hydrolase, chitinase active site|IPR003610|Carbohydrate-binding module family 5/12|IPR003610|Carbohydrate-binding module family 5/12|IPR017853|Glycoside hydrolase superfamily|GH18-CBM5||	1	0	6	14	5	3	0
b61	b61.a2	jgi|Tramen1|683786|CE683785_495|3.2.1.14|METABOLIC|IPR003610|Carbohydrate-binding module family 5/12|IPR001579|Glycoside hydrolase, chitinase active site|IPR003610|Carbohydrate-binding module family 5/12|IPR003610|Carbohydrate-binding module family 5/12|IPR017853|Glycoside hydrolase superfamily|GH18-CBM5||	1	0	5	4	2	2	0
b62	b62.a1	jgi|Tramen1|1054356|gm1.5568_g|IPR005629|Beta-glucan synthesis-associated, SKN1|IPR013320|Concanavalin A-like lectin/glucanase domain|GH16||	1	0	8	5	14	5	0
b63	b63.a1	jgi|Tramen1|1044995|fgenesh1_pm.13_#_56|IPR006045|Cupin 1|IPR006045|Cupin 1|IPR011051|RmlC-like cupin domain|IPR017774|Bicupin, oxalate decarboxylase/oxidase|	1	0	2	14	6	9	1
b64	b64.a1	jgi|Tramen1|920195|e_gw1.24.81.1|3.4.14.9|\N|IPR000209|Peptidase S8/S53 domain|IPR015366|Peptidase S53, propeptide|IPR030400|Sedolisin domain|IPR015366|Peptidase S53, propeptide|IPR000209|Peptidase S8/S53 domain|IPR009020|Proteinase inhibitor, propeptide|	1	0	5	16	4	5	0
b64	b64.a2	jgi|Tramen1|1067507|MIX7593_17674_49|3.4.14.9|\N|IPR000209|Peptidase S8/S53 domain|IPR015366|Peptidase S53, propeptide|IPR030400|Sedolisin domain|IPR015366|Peptidase S53, propeptide|IPR000209|Peptidase S8/S53 domain|IPR009020|Proteinase inhibitor, propeptide|	1	0	1	1	1	1	0
b64	b64.a3	jgi|Tramen1|1047608|fgenesh1_pm.37_#_1|3.4.14.9|\N|IPR000209|Peptidase S8/S53 domain|IPR015366|Peptidase S53, propeptide|IPR030400|Sedolisin domain|IPR015366|Peptidase S53, propeptide|IPR000209|Peptidase S8/S53 domain|IPR009020|Proteinase inhibitor, propeptide|	1	0	1	1	2	0	0
b65	b65.a1	jgi|Tramen1|913295|e_gw1.10.172.1|3.1.27.1|\N|IPR001568|Ribonuclease T2-like|IPR018188|Ribonuclease T2, active site|IPR018188|Ribonuclease T2, active site|IPR001568|Ribonuclease T2-like|	1	0	4	16	6	6	0
b66	b66.a1	jgi|Tramen1|440450|CE440449_3143|3.2.1.21|METABOLIC|IPR001764|Glycoside hydrolase, family 3, N-terminal|IPR002772|Glycoside hydrolase family 3 C-terminal domain|IPR026891|Fibronectin type III-like domain|IPR001764|Glycoside hydrolase, family 3, N-terminal|IPR017853|Glycoside hydrolase superfamily|IPR002772|Glycoside hydrolase family 3 C-terminal domain|GH3||	1	0	7	6	12	5	0
b67	b67.a1	jgi|Tramen1|903967|e_gw1.1.260.1|IPR000254|Cellulose-binding domain, fungal|IPR016288|1, 4-beta cellobiohydrolase|IPR016288|1, 4-beta cellobiohydrolase|IPR016288|1, 4-beta cellobiohydrolase|IPR000254|Cellulose-binding domain, fungal|IPR001524|Glycoside hydrolase, family 6, conserved site|IPR001524|Glycoside hydrolase, family 6, conserved site|IPR000254|Cellulose-binding domain, fungal|IPR000254|C…	1	0	19	5	3	2	0
b68	b68.a1	jgi|Tramen1|917503|e_gw1.18.7.1|3.2.1.52|METABOLIC|IPR015883|Glycoside hydrolase family 20, catalytic core|IPR015882|Beta-hexosaminidase, bacteial type, N-terminal|IPR025705|Beta-hexosaminidase|IPR017853|Glycoside hydrolase superfamily|IPR029018|Chitobiase/beta-hexosaminidase domain 2-like|GH20||	1	0	12	6	7	4	0
b69	b69.a1	jgi|Tramen1|1015879|fgenesh1_kg.31_#_132_#_TRINITY_DN694_c0_g1_i4|3.4.14.9|\N|IPR000209|Peptidase S8/S53 domain|IPR015366|Peptidase S53, propeptide|IPR023828|Peptidase S8, subtilisin, Ser-active site|IPR030400|Sedolisin domain|IPR015366|Peptidase S53, propeptide|IPR000209|Peptidase S8/S53 domain|IPR009020|Proteinase inhibitor, propeptide|	1	1	4	11	4	9	0
b70	b70.a1	jgi|Tramen1|1055626|gm1.6838_g|IPR029045|ClpP/crotonase-like domain|	1	0	2	11	5	10	0
b71	b71.a1	jgi|Tramen1|1057537|gm1.8749_g|3.1.1.3|METABOLIC|IPR002018|Carboxylesterase, type B|IPR019826|Carboxylesterase type B, active site|IPR019819|Carboxylesterase type B, conserved site|IPR029058|Alpha/Beta hydrolase fold|	1	0	9	8	6	3	2
b72	b72.a1	jgi|Tramen1|936461|fgenesh1_pg.35_#_74|\N|\N|IPR017853|Glycoside hydrolase superfamily|GH79||	1	0	8	8	5	7	0
b73	b73.a1	jgi|Tramen1|1012263|fgenesh1_kg.28_#_1173_#_TRINITY_DN3995_c0_g3_i1|3.2.1.4|METABOLIC|IPR001547|Glycoside hydrolase, family 5|IPR000254|Cellulose-binding domain, fungal|IPR000254|Cellulose-binding domain, fungal|IPR018087|Glycoside hydrolase, family 5, conserved site|IPR000254|Cellulose-binding domain, fungal|IPR000254|Cellulose-binding domain, fungal|IPR017853|Glycoside hydrolase superfamily|IPR…	1	0	13	3	10	2	0
b74	b74.a1	jgi|Tramen1|954139|fgenesh1_kg.4_#_420_#_TRINITY_DN4791_c3_g8_i1|IPR010829|Cerato-platanin|IPR009009|RlpA-like double-psi beta-barrel domain|EXPN||	1	0	3	5	12	6	1
b75	b75.a1	jgi|Tramen1|314359|CE314358_15995|3.4.-.-|METABOLIC|IPR008758|Peptidase S28|IPR029058|Alpha/Beta hydrolase fold|	1	0	6	6	5	10	0
b76	b76.a1	jgi|Tramen1|1021585|fgenesh1_kg.35_#_1085_#_TRINITY_DN1955_c0_g1_i2|IPR012939|Glycosyl hydrolase family 92|IPR008928|Six-hairpin glycosidase-like|IPR005887|Alpha-1,2-mannosidase, putative|GH92||	1	0	1	11	9	5	0
b77	b77.a1	jgi|Tramen1|927121|e_gw1.52.127.1|1.1.99.1|METABOLIC|IPR000172|Glucose-methanol-choline oxidoreductase, N-terminal|IPR007867|Glucose-methanol-choline oxidoreductase, C-terminal|IPR012132|Glucose-methanol-choline oxidoreductase|IPR000172|Glucose-methanol-choline oxidoreductase, N-terminal|IPR000172|Glucose-methanol-choline oxidoreductase, N-terminal|\N|\N|\N|\N|AA3_2||	1	0	5	11	5	4	0
b78	b78.a1	jgi|Tramen1|1059556|gm1.10768_g|IPR012878|Protein of unknown function DUF1680|IPR008928|Six-hairpin glycosidase-like|	1	0	6	8	6	4	1
b79	b79.a1	jgi|Tramen1|1057480|gm1.8692_g|3.2.1.99|\N|IPR006710|Glycoside hydrolase, family 43|IPR016840|Glycoside hydrolase, family 43, endo-1, 5-alpha-L-arabinosidase|IPR023296|Glycosyl hydrolase, five-bladed beta-propellor domain|GH43||	1	0	5	9	7	4	0
b80	b80.a1	jgi|Tramen1|934318|fgenesh1_pg.18_#_90|3.2.1.20|METABOLIC|IPR000322|Glycoside hydrolase family 31|IPR030458|Glycosyl hydrolases family 31, active site|IPR030459|Glycosyl hydrolases family 31, conserved site|\N|\N|IPR017853|Glycoside hydrolase superfamily|IPR011013|Galactose mutarotase-like domain|GH31||	1	0	2	6	5	10	1
b81	b81.a1	jgi|Tramen1|1053950|gm1.5162_g|GH115||	1	0	4	5	4	5	0
b81	b81.a2	jgi|Tramen1|915222|e_gw1.13.314.1|GH115||	1	0	1	3	0	3	0
b82	b82.a1	jgi|Tramen1|931673|fgenesh1_pg.6_#_125|3.2.1.4|METABOLIC|IPR000254|Cellulose-binding domain, fungal|IPR005103|Glycoside hydrolase, family 61|IPR000254|Cellulose-binding domain, fungal|IPR000254|Cellulose-binding domain, fungal|IPR000254|Cellulose-binding domain, fungal|IPR000254|Cellulose-binding domain, fungal|AA9-CBM1||	1	0	13	2	2	0	0
b82	b82.a2	jgi|Tramen1|1057183|gm1.8395_g|3.2.1.4|METABOLIC|IPR005103|Glycoside hydrolase, family 61|AA9||	1	0	4	1	5	1	0
b83	b83.a1	jgi|Tramen1|924816|e_gw1.38.107.1|3.2.1.14|METABOLIC|IPR001223|Glycoside hydrolase, family 18, catalytic domain|IPR001579|Glycoside hydrolase, chitinase active site|IPR011583|Chitinase II|IPR017853|Glycoside hydrolase superfamily|IPR029070|Chitinase insertion domain|GH18||	1	1	2	12	5	4	0
b84	b84.a1	jgi|Tramen1|1042341|fgenesh1_pm.3_#_236|3.1.1.72|\N|IPR000254|Cellulose-binding domain, fungal|\N|\N|IPR000254|Cellulose-binding domain, fungal|IPR000254|Cellulose-binding domain, fungal|IPR000254|Cellulose-binding domain, fungal|IPR029058|Alpha/Beta hydrolase fold|IPR000254|Cellulose-binding domain, fungal|IPR010126|Esterase, PHB depolymerase|CBM1-CE1||	1	0	9	5	6	2	0
b84	b84.a2	jgi|Tramen1|693655|CE693654_30928|3.1.1.72|\N|IPR000254|Cellulose-binding domain, fungal|\N|\N|IPR000254|Cellulose-binding domain, fungal|IPR000254|Cellulose-binding domain, fungal|IPR000254|Cellulose-binding domain, fungal|IPR029058|Alpha/Beta hydrolase fold|IPR000254|Cellulose-binding domain, fungal|IPR010126|Esterase, PHB depolymerase|CBM1-CE1||	1	0	2	0	0	0	0
b85	b85.a1	jgi|Tramen1|923580|e_gw1.34.299.1|3.2.1.99|\N|IPR006710|Glycoside hydrolase, family 43|IPR016840|Glycoside hydrolase, family 43, endo-1, 5-alpha-L-arabinosidase|IPR023296|Glycosyl hydrolase, five-bladed beta-propellor domain|GH43||	1	0	0	18	0	5	0
b86	b86.a1	jgi|Tramen1|655533|CE655532_48498|3.4.23.5|\N|IPR001461|Aspartic peptidase|IPR001461|Aspartic peptidase|IPR001969|Aspartic peptidase, active site|IPR021109|Aspartic peptidase domain|	1	0	4	4	6	0	0
b86	b86.a2	jgi|Tramen1|1042137|fgenesh1_pm.3_#_32|3.4.23.5|\N|IPR001461|Aspartic peptidase|IPR001461|Aspartic peptidase|IPR001969|Aspartic peptidase, active site|IPR021109|Aspartic peptidase domain|	1	0	3	2	3	2	1
b87	b87.a1	jgi|Tramen1|922366|e_gw1.30.162.1|IPR009486|Purine nucleoside permease|	1	0	3	9	4	6	0
b88	b88.a1	jgi|Tramen1|1050920|gm1.2132_g|3.2.1.4|METABOLIC|IPR005103|Glycoside hydrolase, family 61|AA9||	1	1	14	3	2	1	0
b89	b89.a1	jgi|Tramen1|1045116|fgenesh1_pm.14_#_25|	1	0	2	7	6	5	0
b90	b90.a1	jgi|Tramen1|1045814|fgenesh1_pm.19_#_20|\N|\N|IPR009078|Ferritin-like superfamily|	1	0	5	4	7	4	0
b91	b91.a1	jgi|Tramen1|201128|CE201127_3072|1.11.1.6|METABOLIC|IPR011614|Catalase core domain|IPR010582|Catalase immune-responsive domain|IPR024711|Catalase, mono-functional, haem-containing, clades 1 and 3|IPR018028|Catalase, mono-functional, haem-containing|IPR002226|Catalase haem-binding site|IPR024708|Catalase active site|IPR018028|Catalase, mono-functional, haem-containing|IPR011614|Catalase core domai…	1	0	0	4	4	6	0
b91	b91.a2	jgi|Tramen1|1045326|fgenesh1_pm.15_#_69|1.11.1.6|METABOLIC|IPR011614|Catalase core domain|IPR010582|Catalase immune-responsive domain|IPR024711|Catalase, mono-functional, haem-containing, clades 1 and 3|IPR018028|Catalase, mono-functional, haem-containing|IPR002226|Catalase haem-binding site|IPR024708|Catalase active site|IPR018028|Catalase, mono-functional, haem-containing|IPR011614|Catalase cor…	1	0	3	2	2	2	0
b92	b92.a1	jgi|Tramen1|916947|e_gw1.17.444.1|3.4.14.9|\N|IPR015366|Peptidase S53, propeptide|IPR023828|Peptidase S8, subtilisin, Ser-active site|IPR030400|Sedolisin domain|IPR015366|Peptidase S53, propeptide|IPR000209|Peptidase S8/S53 domain|IPR009020|Proteinase inhibitor, propeptide|	1	0	5	7	3	5	0
b93	b93.a1	jgi|Tramen1|1048269|fgenesh1_pm.50_#_1|3.2.1.58|METABOLIC|IPR001547|Glycoside hydrolase, family 5|IPR017853|Glycoside hydrolase superfamily|GH5_9||	1	0	3	5	7	4	0
b94	b94.a1	jgi|Tramen1|911470|e_gw1.8.306.1|3.2.1.78|METABOLIC|IPR001547|Glycoside hydrolase, family 5|IPR000254|Cellulose-binding domain, fungal|IPR000254|Cellulose-binding domain, fungal|IPR018087|Glycoside hydrolase, family 5, conserved site|IPR000254|Cellulose-binding domain, fungal|IPR000254|Cellulose-binding domain, fungal|IPR017853|Glycoside hydrolase superfamily|IPR000254|Cellulose-binding domain, f…	1	0	6	6	7	0	0
b95	b95.a1	jgi|Tramen1|1018647|fgenesh1_kg.33_#_472_#_TRINITY_DN4583_c2_g1_i4|3.1.1.11|METABOLIC|IPR000070|Pectinesterase, catalytic|IPR011050|Pectin lyase fold/virulence factor|CE8||	1	0	3	6	1	7	1
b96	b96.a1	jgi|Tramen1|986102|fgenesh1_kg.13_#_2724_#_TRINITY_DN4667_c1_g2_i1|1.2.1.12|METABOLIC|IPR020828|Glyceraldehyde 3-phosphate dehydrogenase, NAD(P) binding domain|IPR020829|Glyceraldehyde 3-phosphate dehydrogenase, catalytic domain|IPR020831|Glyceraldehyde/Erythrose phosphate dehydrogenase family|IPR020831|Glyceraldehyde/Erythrose phosphate dehydrogenase family|IPR020830|Glyceraldehyde 3-phosphate d…	1	0	8	2	7	1	0
b97	b97.a1	jgi|Tramen1|946461|fgenesh1_kg.2_#_2786_#_TRINITY_DN3889_c0_g4_i3|3.5.1.41|METABOLIC|IPR002509|Polysaccharide deacetylase|IPR002509|Polysaccharide deacetylase|IPR011330|Glycoside hydrolase/deacetylase, beta/alpha-barrel|CE4||	1	0	5	2	5	3	0
b97	b97.a2	jgi|Tramen1|908440|e_gw1.5.113.1|IPR002509|Polysaccharide deacetylase|IPR002509|Polysaccharide deacetylase|IPR011330|Glycoside hydrolase/deacetylase, beta/alpha-barrel|CE4||	1	0	2	2	2	1	0
b98	b98.a1	jgi|Tramen1|566630|CE566629_4635|3.2.1.14|METABOLIC|IPR003610|Carbohydrate-binding module family 5/12|IPR001579|Glycoside hydrolase, chitinase active site|IPR003610|Carbohydrate-binding module family 5/12|IPR003610|Carbohydrate-binding module family 5/12|IPR017853|Glycoside hydrolase superfamily|GH18-CBM5-CBM5|fragment N-term;|	1	0	5	9	2	2	0
b99	b99.a1	jgi|Tramen1|918294|e_gw1.19.419.1|IPR001087|GDSL lipase/esterase|IPR013830|SGNH hydrolase-type esterase domain|	1	0	1	12	1	4	0
c100	c100.a1	jgi|Tramen1|933693|fgenesh1_pg.14_#_131|3.2.1.4|METABOLIC|IPR001547|Glycoside hydrolase, family 5|IPR000254|Cellulose-binding domain, fungal|IPR018087|Glycoside hydrolase, family 5, conserved site|IPR000254|Cellulose-binding domain, fungal|IPR000254|Cellulose-binding domain, fungal|IPR017853|Glycoside hydrolase superfamily|IPR000254|Cellulose-binding domain, fungal|CBM1-GH5_5||	1	0	7	2	7	2	0
c101	c101.a1	jgi|Tramen1|913301|e_gw1.10.265.1|3.4.24.20|\N|IPR029463|Lysine-specific metallo-endopeptidase|\N|\N|	1	0	2	6	2	6	1
c102	c102.a1	jgi|Tramen1|907994|e_gw1.4.635.1|\N|\N|	1	0	3	6	4	4	0
c103	c103.a1	jgi|Tramen1|912220|e_gw1.9.316.1|3.4.23.25|\N|IPR001461|Aspartic peptidase|IPR001461|Aspartic peptidase|IPR001969|Aspartic peptidase, active site|IPR021109|Aspartic peptidase domain|	1	0	8	0	9	0	0
c104	c104.a1	jgi|Tramen1|934157|fgenesh1_pg.17_#_99|3.2.1.14|METABOLIC|IPR001223|Glycoside hydrolase, family 18, catalytic domain|IPR001683|Phox homologous domain|IPR001579|Glycoside hydrolase, chitinase active site|IPR001683|Phox homologous domain|IPR001683|Phox homologous domain|IPR011583|Chitinase II|IPR017853|Glycoside hydrolase superfamily|IPR001683|Phox homologous domain|GH18||	1	0	3	7	3	4	0
c105	c105.a1	jgi|Tramen1|402450|CE402449_2999|3.2.1.22|METABOLIC|IPR000254|Cellulose-binding domain, fungal|IPR000111|Glycoside hydrolase, clan GH-D|IPR002241|Glycoside hydrolase, family 27|IPR000111|Glycoside hydrolase, clan GH-D|IPR000254|Cellulose-binding domain, fungal|IPR000254|Cellulose-binding domain, fungal|IPR000254|Cellulose-binding domain, fungal|\N|\N|IPR017853|Glycoside hydrolase superfamily|IPR0…	1	0	6	3	5	2	0
c106	c106.a1	jgi|Tramen1|917735|e_gw1.18.48.1|IPR011330|Glycoside hydrolase/deacetylase, beta/alpha-barrel|	1	1	3	4	6	2	0
c107	c107.a1	jgi|Tramen1|714048|CE714047_102866|3.2.1.14|METABOLIC|IPR001223|Glycoside hydrolase, family 18, catalytic domain|IPR001579|Glycoside hydrolase, chitinase active site|IPR011583|Chitinase II|IPR017853|Glycoside hydrolase superfamily|IPR029070|Chitinase insertion domain|GH18||	1	0	2	8	3	3	0
c108	c108.a1	jgi|Tramen1|922359|e_gw1.30.281.1|3.2.1.67|METABOLIC|IPR000743|Glycoside hydrolase, family 28|IPR011050|Pectin lyase fold/virulence factor|GH28||	1	0	5	5	3	3	0
c109	c109.a1	jgi|Tramen1|287220|CE287219_13028|3.1.1.3|METABOLIC|IPR002921|Fungal lipase-like domain|IPR029058|Alpha/Beta hydrolase fold|	1	0	7	6	3	0	0
c110	c110.a1	jgi|Tramen1|435586|CE435585_6484|3.4.16.6|\N|IPR001563|Peptidase S10, serine carboxypeptidase|IPR001563|Peptidase S10, serine carboxypeptidase|IPR018202|Peptidase S10, serine carboxypeptidase, active site|IPR029058|Alpha/Beta hydrolase fold|	1	1	2	6	3	3	1
c111	c111.a1	jgi|Tramen1|917268|e_gw1.17.462.1|3.4.-.-|METABOLIC|IPR008758|Peptidase S28|IPR029058|Alpha/Beta hydrolase fold|	1	0	2	5	4	4	0
c112	c112.a1	jgi|Tramen1|915947|e_gw1.14.438.1|3.2.1.8|\N|IPR001137|Glycoside hydrolase, family 11|IPR000254|Cellulose-binding domain, fungal|IPR001137|Glycoside hydrolase, family 11|IPR000254|Cellulose-binding domain, fungal|IPR018208|Glycoside hydrolase, family 11, active site|IPR018208|Glycoside hydrolase, family 11, active site|IPR000254|Cellulose-binding domain, fungal|IPR000254|Cellulose-binding domain,…	1	0	6	3	4	2	0
c113	c113.a1	jgi|Tramen1|416753|CE416752_12378|IPR010905|Glycosyl hydrolase, family 88|IPR008928|Six-hairpin glycosidase-like|GH88||	1	0	4	5	3	2	1
c114	c114.a1	jgi|Tramen1|917744|e_gw1.18.126.1|\N|\N|IPR013830|SGNH hydrolase-type esterase domain|	1	0	6	4	1	4	0
c115	c115.a1	jgi|Tramen1|445511|CE445510_9948|3.4.21.48|\N|IPR000209|Peptidase S8/S53 domain|IPR010259|Peptidase S8 propeptide/proteinase inhibitor I9|IPR015500|Peptidase S8, subtilisin-related|IPR023827|Peptidase S8, subtilisin, Asp-active site|IPR022398|Peptidase S8, subtilisin, His-active site|IPR023828|Peptidase S8, subtilisin, Ser-active site|IPR000209|Peptidase S8/S53 domain|IPR009020|Proteinase inhibit…	1	0	4	3	3	4	0
c116	c116.a1	jgi|Tramen1|919067|e_gw1.21.332.1|3.5.1.23|METABOLIC|IPR006823|Neutral/alkaline nonlysosomal ceramidase|	1	0	6	4	2	2	0
c117	c117.a1	jgi|Tramen1|995287|fgenesh1_kg.18_#_1309_#_TRINITY_DN4276_c2_g2_i8|3.2.1.25|METABOLIC|IPR008979|Galactose-binding domain-like|IPR017853|Glycoside hydrolase superfamily|GH2||	1	0	0	7	1	6	0
c118	c118.a1	jgi|Tramen1|196704|CE196703_2803|3.2.1.67|METABOLIC|IPR000743|Glycoside hydrolase, family 28|IPR000743|Glycoside hydrolase, family 28|IPR011050|Pectin lyase fold/virulence factor|GH28||	1	0	6	3	2	3	0
c119	c119.a1	jgi|Tramen1|95318|CE95317_32730|3.2.1.4|METABOLIC|IPR005103|Glycoside hydrolase, family 61|AA9||	1	0	6	3	4	1	0
c120	c120.a1	jgi|Tramen1|904269|e_gw1.1.455.1|2.7.4.6|METABOLIC|IPR001564|Nucleoside diphosphate kinase|IPR001564|Nucleoside diphosphate kinase|IPR023005|Nucleoside diphosphate kinase, active site|IPR001564|Nucleoside diphosphate kinase|IPR001564|Nucleoside diphosphate kinase|	1	0	4	1	5	2	1
c121	c121.a1	jgi|Tramen1|909032|e_gw1.5.758.1|3.2.1.21|METABOLIC|IPR000254|Cellulose-binding domain, fungal|IPR001764|Glycoside hydrolase, family 3, N-terminal|IPR002772|Glycoside hydrolase family 3 C-terminal domain|IPR026891|Fibronectin type III-like domain|IPR001764|Glycoside hydrolase, family 3, N-terminal|IPR000254|Cellulose-binding domain, fungal|IPR000254|Cellulose-binding domain, fungal|IPR017853|Glyc…	1	0	6	1	6	0	0
c122	c122.a1	jgi|Tramen1|924929|e_gw1.38.87.1|3.1.1.3|METABOLIC|IPR002921|Fungal lipase-like domain|IPR029058|Alpha/Beta hydrolase fold|	1	0	9	1	2	1	0
c123	c123.a1	jgi|Tramen1|121074|CE121073_15765|IPR000757|Glycoside hydrolase, family 16|IPR013320|Concanavalin A-like lectin/glucanase domain|GH16||	1	0	3	6	3	0	0
c124	c124.a1	jgi|Tramen1|1058397|gm1.9609_g|IPR009291|Vacuolar protein sorting-associated protein 62|	1	1	3	3	3	2	0
c125	c125.a1	jgi|Tramen1|914914|e_gw1.12.266.1|IPR005151|Tail specific protease|IPR029045|ClpP/crotonase-like domain|	1	0	3	4	2	3	0
c126	c126.a1	jgi|Tramen1|1041809|fgenesh1_pm.2_#_63|3.2.1.8|\N|IPR001000|Glycoside hydrolase, family 10|IPR001000|Glycoside hydrolase, family 10|\N|\N|IPR001000|Glycoside hydrolase, family 10|IPR017853|Glycoside hydrolase superfamily|GH10||	1	0	8	1	2	1	0
c127	c127.a1	jgi|Tramen1|912218|e_gw1.9.492.1|3.2.1.89|\N|IPR011683|Glycosyl hydrolase family 53|IPR017853|Glycoside hydrolase superfamily|GH53||	1	0	4	6	2	0	0
c128	c128.a1	jgi|Tramen1|1049410|gm1.622_g|IPR001087|GDSL lipase/esterase|IPR013830|SGNH hydrolase-type esterase domain|CE16|fragment C-term;|	1	0	3	4	4	1	0
c129	c129.a1	jgi|Tramen1|929521|fgenesh1_pg.1_#_14|3.2.1.58|METABOLIC|IPR001547|Glycoside hydrolase, family 5|IPR017853|Glycoside hydrolase superfamily|GH5_9||	1	0	3	3	3	3	0
c130	c130.a1	jgi|Tramen1|511119|CE511118_2184|	1	0	3	1	3	1	3
c131	c131.a1	jgi|Tramen1|958305|fgenesh1_kg.5_#_771_#_TRINITY_DN2066_c1_g2_i3|IPR000757|Glycoside hydrolase, family 16|IPR013320|Concanavalin A-like lectin/glucanase domain|GH16||	1	0	2	3	3	2	1
c132	c132.a1	jgi|Tramen1|926168|e_gw1.45.158.1|IPR012480|Heparinase II/III-like|IPR008929|Chondroitin AC/alginate lyase|	1	0	1	5	4	1	0
c133	c133.a1	jgi|Tramen1|977038|fgenesh1_kg.10_#_2381_#_TRINITY_DN825_c0_g1_i1|3.2.1.37|METABOLIC|IPR001764|Glycoside hydrolase, family 3, N-terminal|IPR002772|Glycoside hydrolase family 3 C-terminal domain|IPR026891|Fibronectin type III-like domain|IPR017853|Glycoside hydrolase superfamily|IPR002772|Glycoside hydrolase family 3 C-terminal domain|GH3||	1	0	4	3	2	2	0
c134	c134.a1	jgi|Tramen1|921049|e_gw1.27.224.1|IPR000254|Cellulose-binding domain, fungal|IPR000254|Cellulose-binding domain, fungal|IPR000254|Cellulose-binding domain, fungal|IPR000254|Cellulose-binding domain, fungal|IPR029058|Alpha/Beta hydrolase fold|IPR000254|Cellulose-binding domain, fungal|CBM1-CE15||	1	0	4	4	1	2	0
c135	c135.a1	jgi|Tramen1|921208|e_gw1.27.347.1|\N|\N|IPR009078|Ferritin-like superfamily|	1	0	1	4	3	2	0
c136	c136.a1	jgi|Tramen1|438038|CE438037_1180|3.4.24.39|\N|IPR001384|Peptidase M35, deuterolysin|IPR001384|Peptidase M35, deuterolysin|\N|\N|	1	0	3	1	3	2	1
c137	c137.a1	jgi|Tramen1|1050121|gm1.1333_g|1.1.3.9|METABOLIC|IPR009880|Glyoxal oxidase, N-terminal|IPR015202|Domain of unknown function DUF1929|IPR011043|Galactose oxidase/kelch, beta-propeller|IPR014756|Immunoglobulin E-set|AA5_1||	1	0	3	0	7	0	0
c138	c138.a1	jgi|Tramen1|936816|fgenesh1_pg.39_#_32|IPR001296|Glycosyl transferase, family 1|\N|\N|GT4||	1	0	5	1	3	0	1
c139	c139.a1	jgi|Tramen1|1049283|gm1.495_g|3.2.1.50|METABOLIC|IPR024733|Alpha-N-acetylglucosaminidase, tim-barrel domain|IPR024240|Alpha-N-acetylglucosaminidase, N-terminal|IPR024732|Alpha-N-acetylglucosaminidase, C-terminal|GH89||	1	0	5	2	2	1	0
c140	c140.a1	jgi|Tramen1|910169|e_gw1.6.865.1|IPR013830|SGNH hydrolase-type esterase domain|	1	0	2	3	2	1	1
c141	c141.a1	jgi|Tramen1|914139|e_gw1.11.563.1|3.4.24.-|\N|IPR001842|Peptidase M36, fungalysin|IPR011096|FTP domain|IPR001842|Peptidase M36, fungalysin|\N|\N|	1	0	1	3	3	2	0
c142	c142.a1	jgi|Tramen1|438279|CE438278_3222|	1	0	0	6	0	3	0
c143	c143.a1	jgi|Tramen1|1006560|fgenesh1_kg.25_#_158_#_TRINITY_DN2750_c0_g3_i2|3.1.1.7|METABOLIC|IPR002018|Carboxylesterase, type B|IPR019826|Carboxylesterase type B, active site|IPR019819|Carboxylesterase type B, conserved site|IPR029058|Alpha/Beta hydrolase fold|	1	0	7	0	1	1	0
c144	c144.a1	jgi|Tramen1|1043148|fgenesh1_pm.5_#_330|IPR003159|Polysaccharide lyase family 8, central domain|IPR004103|Polysaccharide lyase family 8, C-terminal|IPR012970|Polysaccharide lyase 8, N-terminal alpha-helical|IPR008929|Chondroitin AC/alginate lyase|IPR011071|Polysaccharide lyase family 8-like, C-terminal|IPR011013|Galactose mutarotase-like domain|PL8_4||	1	0	1	4	2	2	0
c145	c145.a1	jgi|Tramen1|48830|CE48829_15481|3.1.3.8|METABOLIC|IPR000560|Histidine phosphatase superfamily, clade-2|IPR000560|Histidine phosphatase superfamily, clade-2|IPR029033|Histidine phosphatase superfamily|	1	0	2	3	2	2	0
c146	c146.a1	jgi|Tramen1|497583|CE497582_14065|3.2.1.4|METABOLIC|IPR005103|Glycoside hydrolase, family 61|AA9||	1	0	7	2	0	0	0
c147	c147.a1	jgi|Tramen1|988378|fgenesh1_kg.15_#_525_#_TRINITY_DN2165_c0_g2_i3|IPR004843|Calcineurin-like phosphoesterase domain, apaH type|IPR029052|Metallo-dependent phosphatase-like|	1	0	1	4	1	3	0
c148	c148.a1	jgi|Tramen1|1092621|MIX32707_14607_77|IPR002594|Glycoside hydrolase, family 12|IPR013320|Concanavalin A-like lectin/glucanase domain|GH12||	1	0	2	3	4	0	0
c149	c149.a1	jgi|Tramen1|1057715|gm1.8927_g|5.1.3.3|METABOLIC|IPR008183|Aldose 1-/Glucose-6-phosphate 1-epimerase|IPR011013|Galactose mutarotase-like domain|	1	0	4	4	1	0	0
c150	c150.a1	jgi|Tramen1|1058666|gm1.9878_g|1.6.5.5|\N|IPR013149|Alcohol dehydrogenase, C-terminal|IPR013154|Alcohol dehydrogenase GroES-like|IPR020843|Polyketide synthase, enoylreductase domain|IPR011032|GroES (chaperonin 10)-like|\N|\N|	1	0	5	1	2	0	0
c151	c151.a1	jgi|Tramen1|926306|e_gw1.46.116.1|3.4.23.34|\N|IPR001461|Aspartic peptidase|IPR001461|Aspartic peptidase|IPR001969|Aspartic peptidase, active site|IPR021109|Aspartic peptidase domain|	1	0	1	3	1	1	0
c151	c151.a2	jgi|Tramen1|926359|e_gw1.46.142.1|3.4.23.34|\N|IPR001461|Aspartic peptidase|IPR001461|Aspartic peptidase|IPR001969|Aspartic peptidase, active site|IPR021109|Aspartic peptidase domain|	1	0	1	2	1	2	0
c152	c152.a1	jgi|Tramen1|915534|e_gw1.13.145.1|IPR013320|Concanavalin A-like lectin/glucanase domain|GH16||	1	0	2	3	3	0	0
c153	c153.a1	jgi|Tramen1|1046503|fgenesh1_pm.25_#_48|3.2.1.4|METABOLIC|IPR005103|Glycoside hydrolase, family 61|AA9||	1	0	3	1	1	0	0
c153	c153.a2	jgi|Tramen1|1048317|fgenesh1_pm.52_#_6|3.2.1.4|METABOLIC|IPR005103|Glycoside hydrolase, family 61|AA9||	1	0	0	3	0	1	0
c154	c154.a1	jgi|Tramen1|678729|CE678728_66127|3.2.1.58|METABOLIC|IPR000490|Glycoside hydrolase, family 17|IPR017853|Glycoside hydrolase superfamily|GH17||	1	0	1	3	2	2	0
c155	c155.a1	jgi|Tramen1|1072083|MIX12169_3236_61|IPR006094|FAD linked oxidase, N-terminal|IPR012951|Berberine/berberine-like|IPR016166|FAD-binding, type 2|IPR016166|FAD-binding, type 2|	1	0	2	3	2	1	0
c156	c156.a1	jgi|Tramen1|910166|e_gw1.6.760.1|3.4.23.1|\N|IPR001461|Aspartic peptidase|IPR001461|Aspartic peptidase|IPR001969|Aspartic peptidase, active site|IPR021109|Aspartic peptidase domain|	1	0	0	4	1	3	0
c157	c157.a1	jgi|Tramen1|250112|CE250111_13610|IPR001087|GDSL lipase/esterase|IPR013830|SGNH hydrolase-type esterase domain|CE16||	1	0	3	2	2	0	0
c158	c158.a1	jgi|Tramen1|1057569|gm1.8781_g|IPR000254|Cellulose-binding domain, fungal|IPR000254|Cellulose-binding domain, fungal|IPR000254|Cellulose-binding domain, fungal|IPR000254|Cellulose-binding domain, fungal|GH131-CBM1||	1	0	4	1	1	1	0
c159	c159.a1	jgi|Tramen1|1121803|estExt_fgenesh1_pg.C_250028|1.1.1.1|METABOLIC|IPR013149|Alcohol dehydrogenase, C-terminal|IPR013154|Alcohol dehydrogenase GroES-like|IPR020843|Polyketide synthase, enoylreductase domain|IPR011032|GroES (chaperonin 10)-like|\N|\N|	1	0	1	2	2	2	0
c160	c160.a1	jgi|Tramen1|926878|e_gw1.49.13.1|IPR019405|Lactonase, 7-bladed beta propeller|\N|\N|	1	0	1	2	1	2	1
c161	c161.a1	jgi|Tramen1|965364|fgenesh1_kg.7_#_707_#_TRINITY_DN4198_c1_g1_i1|3.4.23.5|\N|IPR001461|Aspartic peptidase|IPR001461|Aspartic peptidase|IPR001969|Aspartic peptidase, active site|IPR021109|Aspartic peptidase domain|	1	0	2	2	2	1	0
c162	c162.a1	jgi|Tramen1|1097277|MIX37363_15512_64|1.6.99.1|\N|IPR001155|NADH:flavin oxidoreductase/NADH oxidase, N-terminal|\N|\N|	1	0	1	1	3	2	0
c163	c163.a1	jgi|Tramen1|909220|e_gw1.5.634.1|IPR001351|Ribosomal protein S3, C-terminal|IPR004044|K Homology domain, type 2|IPR018280|Ribosomal protein S3, conserved site|IPR004044|K Homology domain, type 2|IPR009019|K homology domain, prokaryotic type|IPR001351|Ribosomal protein S3, C-terminal|IPR005703|Ribosomal protein S3, eukaryotic/archaeal|	1	0	3	0	3	1	0
c164	c164.a1	jgi|Tramen1|231638|CE231637_517|3.4.23.34|\N|IPR001461|Aspartic peptidase|IPR001461|Aspartic peptidase|IPR001969|Aspartic peptidase, active site|IPR021109|Aspartic peptidase domain|	1	0	2	1	3	1	0
c165	c165.a1	jgi|Tramen1|1056219|gm1.7431_g|IPR002053|Glycoside hydrolase, family 25|IPR008270|Glycoside hydrolase, family 25, active site|IPR018077|Glycoside hydrolase, family 25 subgroup|IPR017853|Glycoside hydrolase superfamily|GH25||	1	0	1	2	2	2	0
c166	c166.a1	jgi|Tramen1|907521|e_gw1.4.219.1|IPR024655|Uncharacterised protein family, glycosyl hydrolase catalytic domain|\N|\N|IPR017853|Glycoside hydrolase superfamily|GH128||	1	0	3	1	2	1	0
c167	c167.a1	jgi|Tramen1|1042214|fgenesh1_pm.3_#_109|IPR012939|Glycosyl hydrolase family 92|IPR008928|Six-hairpin glycosidase-like|IPR005887|Alpha-1,2-mannosidase, putative|GH92||	1	0	0	3	0	4	0
c168	c168.a1	jgi|Tramen1|532967|CE532966_32329|3.2.1.4|METABOLIC|IPR001547|Glycoside hydrolase, family 5|IPR000254|Cellulose-binding domain, fungal|IPR000254|Cellulose-binding domain, fungal|IPR018087|Glycoside hydrolase, family 5, conserved site|IPR000254|Cellulose-binding domain, fungal|IPR000254|Cellulose-binding domain, fungal|IPR017853|Glycoside hydrolase superfamily|IPR000254|Cellulose-binding domain, f…	1	0	2	1	3	1	0
c169	c169.a1	jgi|Tramen1|1055353|gm1.6565_g|IPR001223|Glycoside hydrolase, family 18, catalytic domain|IPR001579|Glycoside hydrolase, chitinase active site|IPR017853|Glycoside hydrolase superfamily|GH18||	1	0	0	3	3	1	0
c170	c170.a1	jgi|Tramen1|926733|e_gw1.49.150.1|IPR019405|Lactonase, 7-bladed beta propeller|\N|\N|	1	0	1	2	3	1	0
c171	c171.a1	jgi|Tramen1|904845|e_gw1.2.510.1|IPR009009|RlpA-like double-psi beta-barrel domain|IPR007112|Expansin/pollen allergen, DPBB domain|\N|\N|IPR009009|RlpA-like double-psi beta-barrel domain|GH45||	1	0	2	1	4	0	0
c172	c172.a1	jgi|Tramen1|1087844|MIX27930_11059_45|IPR023210|NADP-dependent oxidoreductase domain|IPR020471|Aldo/keto reductase subgroup|IPR020471|Aldo/keto reductase subgroup|IPR018170|Aldo/keto reductase, conserved site|IPR023210|NADP-dependent oxidoreductase domain|	1	0	2	1	2	1	0
c173	c173.a1	jgi|Tramen1|984677|fgenesh1_kg.13_#_1299_#_TRINITY_DN55_c0_g1_i3|IPR017853|Glycoside hydrolase superfamily|	1	0	2	2	0	2	0
c174	c174.a1	jgi|Tramen1|668678|CE668677_587|1.13.11.5|METABOLIC|IPR005708|Homogentisate 1,2-dioxygenase|IPR011051|RmlC-like cupin domain|IPR005708|Homogentisate 1,2-dioxygenase|	1	0	2	1	2	1	0
c175	c175.a1	jgi|Tramen1|1048304|fgenesh1_pm.51_#_13|IPR000172|Glucose-methanol-choline oxidoreductase, N-terminal|IPR007867|Glucose-methanol-choline oxidoreductase, C-terminal|IPR012132|Glucose-methanol-choline oxidoreductase|IPR000172|Glucose-methanol-choline oxidoreductase, N-terminal|IPR000172|Glucose-methanol-choline oxidoreductase, N-terminal|\N|\N|\N|\N|AA3_2||	1	0	0	4	2	0	0
c176	c176.a1	jgi|Tramen1|948616|fgenesh1_kg.2_#_4941_#_TRINITY_DN3493_c0_g1_i7|3.2.1.58|METABOLIC|IPR001547|Glycoside hydrolase, family 5|IPR017853|Glycoside hydrolase superfamily|GH5_15|(fragment) splicing problem;|	1	0	2	2	0	2	0
c177	c177.a1	jgi|Tramen1|453444|CE453443_8924|3.1.27.1|\N|IPR001568|Ribonuclease T2-like|IPR018188|Ribonuclease T2, active site|IPR018188|Ribonuclease T2, active site|IPR001568|Ribonuclease T2-like|	1	0	2	0	3	1	0
c178	c178.a1	jgi|Tramen1|1056275|gm1.7487_g|3.4.16.2|\N|IPR008758|Peptidase S28|IPR029058|Alpha/Beta hydrolase fold|	1	0	0	2	1	3	0
c179	c179.a1	jgi|Tramen1|952259|fgenesh1_kg.3_#_3191_#_TRINITY_DN2794_c0_g1_i2|3.4.14.9|\N|IPR000209|Peptidase S8/S53 domain|IPR015366|Peptidase S53, propeptide|IPR030400|Sedolisin domain|IPR015366|Peptidase S53, propeptide|IPR000209|Peptidase S8/S53 domain|IPR009020|Proteinase inhibitor, propeptide|	1	0	2	3	1	0	0
c180	c180.a1	jgi|Tramen1|908080|e_gw1.4.493.1|IPR008313|Uncharacterised conserved protein UCP028846|IPR008313|Uncharacterised conserved protein UCP028846|IPR008928|Six-hairpin glycosidase-like|GH125||	1	0	0	3	0	2	0
c181	c181.a1	jgi|Tramen1|1042251|fgenesh1_pm.3_#_146|	1	0	1	2	1	1	0
c182	c182.a1	jgi|Tramen1|437597|CE437596_5750|1.1.3.13|METABOLIC|IPR000172|Glucose-methanol-choline oxidoreductase, N-terminal|IPR007867|Glucose-methanol-choline oxidoreductase, C-terminal|IPR012132|Glucose-methanol-choline oxidoreductase|IPR000172|Glucose-methanol-choline oxidoreductase, N-terminal|IPR000172|Glucose-methanol-choline oxidoreductase, N-terminal|\N|\N|\N|\N|AA3_3||	1	0	3	0	2	0	0
c183	c183.a1	jgi|Tramen1|147665|CE147664_1622|IPR008928|Six-hairpin glycosidase-like|	1	0	1	1	1	2	0
c184	c184.a1	jgi|Tramen1|1105316|estExt_Genemark1.C_100154|2.7.1.40|METABOLIC|IPR015793|Pyruvate kinase, barrel|IPR015795|Pyruvate kinase, C-terminal|IPR001697|Pyruvate kinase|IPR018209|Pyruvate kinase, active site|IPR011037|Pyruvate kinase-like, insert domain|IPR015813|Pyruvate/Phosphoenolpyruvate kinase-like domain|IPR015795|Pyruvate kinase, C-terminal|IPR001697|Pyruvate kinase|	1	0	3	0	2	0	0
c185	c185.a1	jgi|Tramen1|906931|e_gw1.3.1187.1|AA14||	1	0	0	3	1	1	0
c186	c186.a1	jgi|Tramen1|1046738|fgenesh1_pm.27_#_64|IPR013810|Ribosomal protein S5, N-terminal|IPR005324|Ribosomal protein S5, C-terminal|IPR018192|Ribosomal protein S5, N-terminal, conserved site|IPR013810|Ribosomal protein S5, N-terminal|IPR020568|Ribosomal protein S5 domain 2-type fold|\N|\N|IPR005711|Ribosomal protein S5, eukaryotic/archaeal|	1	0	2	0	3	0	0
c187	c187.a1	jgi|Tramen1|326091|CE326090_934|3.1.1.3|METABOLIC|IPR002018|Carboxylesterase, type B|IPR019826|Carboxylesterase type B, active site|IPR029058|Alpha/Beta hydrolase fold|	1	0	3	0	2	0	0
c188	c188.a1	jgi|Tramen1|1052862|gm1.4074_g|2.1.1.14|METABOLIC|IPR002629|Cobalamin-independent methionine synthase MetE, C-terminal/archaeal|IPR013215|Cobalamin-independent methionine synthase MetE, N-terminal|IPR006276|Cobalamin-independent methionine synthase|\N|\N|IPR006276|Cobalamin-independent methionine synthase|	1	0	3	0	1	1	0
c189	c189.a1	jgi|Tramen1|1052329|gm1.3541_g|PL14_5||	1	0	1	2	1	1	0
c190	c190.a1	jgi|Tramen1|954400|fgenesh1_kg.4_#_681_#_TRINITY_DN4752_c1_g1_i1|IPR021131|Ribosomal protein L18e/L15P|IPR021131|Ribosomal protein L18e/L15P|	1	0	3	0	2	0	0
c191	c191.a1	jgi|Tramen1|916898|e_gw1.17.54.1|3.4.14.4|\N|\N|\N|IPR005317|Dipeptidyl-peptidase 3|	1	0	4	0	1	0	0
c192	c192.a1	jgi|Tramen1|1043671|fgenesh1_pm.7_#_208|3.4.14.9|\N|IPR000209|Peptidase S8/S53 domain|IPR015366|Peptidase S53, propeptide|IPR030400|Sedolisin domain|IPR015366|Peptidase S53, propeptide|IPR000209|Peptidase S8/S53 domain|IPR009020|Proteinase inhibitor, propeptide|	1	0	0	3	0	2	0
c193	c193.a1	jgi|Tramen1|937822|fgenesh1_pg.63_#_4|IPR000782|FAS1 domain|IPR000782|FAS1 domain|IPR000782|FAS1 domain|IPR000782|FAS1 domain|	1	0	0	1	2	2	0
c194	c194.a1	jgi|Tramen1|1059517|gm1.10729_g|1.1.1.37|METABOLIC|IPR001236|Lactate/malate dehydrogenase, N-terminal|IPR022383|Lactate/malate dehydrogenase, C-terminal|IPR001557|L-lactate/malate dehydrogenase|IPR001252|Malate dehydrogenase, active site|\N|\N|IPR015955|Lactate dehydrogenase/glycoside hydrolase, family 4, C-terminal|IPR010097|Malate dehydrogenase, type 1|	1	0	1	1	2	1	0
c195	c195.a1	jgi|Tramen1|1025298|fgenesh1_kg.39_#_584_#_TRINITY_DN1911_c0_g2_i1|IPR008972|Cupredoxin|	1	0	0	3	2	0	0
c196	c196.a1	jgi|Tramen1|128808|CE128807_325|IPR017996|Major royal jelly protein/Protein yellow|\N|\N|	1	0	0	3	0	2	0
c197	c197.a1	jgi|Tramen1|989957|fgenesh1_kg.16_#_268_#_TRINITY_DN4376_c0_g1_i7|	1	0	1	2	0	2	0
c198	c198.a1	jgi|Tramen1|52020|CE52019_49549|IPR003172|MD-2-related lipid-recognition domain|IPR003172|MD-2-related lipid-recognition domain|IPR014756|Immunoglobulin E-set|	1	0	1	2	1	0	0
c199	c199.a1	jgi|Tramen1|1103242|estExt_Genemark1.C_40041|IPR010829|Cerato-platanin|IPR009009|RlpA-like double-psi beta-barrel domain|EXPN||	1	0	0	0	4	0	0
c200	c200.a1	jgi|Tramen1|1020511|fgenesh1_kg.35_#_11_#_TRINITY_DN286_c0_g1_i1|IPR004000|Actin family|IPR004000|Actin family|IPR004001|Actin, conserved site|IPR004001|Actin, conserved site|IPR020902|Actin/actin-like conserved site|IPR004000|Actin family|\N|\N|	1	0	0	1	1	1	1
c201	c201.a1	jgi|Tramen1|932017|fgenesh1_pg.7_#_165|AA14||	1	0	0	1	2	1	0
c202	c202.a1	jgi|Tramen1|908497|e_gw1.5.172.1|IPR000795|Elongation factor, GTP-binding domain|IPR004160|Translation elongation factor EFTu/EF1A, C-terminal|IPR004161|Translation elongation factor EFTu/EF1A, domain 2|IPR000795|Elongation factor, GTP-binding domain|IPR000795|Elongation factor, GTP-binding domain|IPR009000|Translation protein, beta-barrel domain|IPR009001|Translation elongation factor EF1A/initi…	1	0	1	1	0	1	1
c203	c203.a1	jgi|Tramen1|971010|fgenesh1_kg.8_#_2501_#_TRINITY_DN3440_c0_g2_i1|IPR001865|Ribosomal protein S2|IPR001865|Ribosomal protein S2|IPR018130|Ribosomal protein S2, conserved site|IPR018130|Ribosomal protein S2, conserved site|IPR023591|Ribosomal protein S2, flavodoxin-like domain|IPR005707|Ribosomal protein S2, eukaryotic/archaeal|	1	0	1	0	2	1	0
c204	c204.a1	jgi|Tramen1|1055291|gm1.6503_g|	1	1	0	1	2	0	0
c205	c205.a1	jgi|Tramen1|924154|e_gw1.36.350.1|IPR006094|FAD linked oxidase, N-terminal|IPR012951|Berberine/berberine-like|IPR006093|Oxygen oxidoreductase covalent FAD-binding site|IPR016166|FAD-binding, type 2|IPR016166|FAD-binding, type 2|	1	0	2	0	2	0	0
c206	c206.a1	jgi|Tramen1|1115561|estExt_fgenesh1_pm.C_300071|2.5.1.16|METABOLIC|IPR001045|Spermidine/spermine synthases|IPR005097|Saccharopine dehydrogenase / Homospermidine synthase|IPR030373|Polyamine biosynthesis domain, conserved site|IPR030374|Polyamine biosynthesis domain|\N|\N|IPR029063|S-adenosyl-L-methionine-dependent methyltransferase|\N|\N|IPR001045|Spermidine/spermine synthases|	1	0	3	0	1	0	0
c207	c207.a1	jgi|Tramen1|915972|e_gw1.14.379.1|1.2.1.3|METABOLIC|IPR015590|Aldehyde dehydrogenase domain|IPR016160|Aldehyde dehydrogenase, cysteine active site|IPR029510|Aldehyde dehydrogenase, glutamic acid active site|IPR016161|Aldehyde/histidinol dehydrogenase|	1	0	1	0	1	1	1
c208	c208.a1	jgi|Tramen1|921891|e_gw1.29.156.1|3.1.3.5|METABOLIC|IPR002828|Survival protein SurE-like phosphatase/nucleotidase|IPR002828|Survival protein SurE-like phosphatase/nucleotidase|	1	0	0	2	1	1	0
c209	c209.a1	jgi|Tramen1|216868|CE216867_5795|IPR000772|Ricin B lectin domain|IPR000772|Ricin B lectin domain|IPR000772|Ricin B lectin domain|\N|\N|CBM13||	1	0	0	2	0	2	0
c210	c210.a1	jgi|Tramen1|1049512|gm1.724_g|IPR014485|Predicted phosphoesterase, C1039.02 type|IPR008334|5'-Nucleotidase, C-terminal|IPR029052|Metallo-dependent phosphatase-like|	1	0	1	1	0	2	0
c211	c211.a1	jgi|Tramen1|904425|e_gw1.1.612.1|4.2.1.24|METABOLIC|IPR013126|Heat shock protein 70 family|IPR013126|Heat shock protein 70 family|IPR018181|Heat shock protein 70, conserved site|IPR018181|Heat shock protein 70, conserved site|IPR018181|Heat shock protein 70, conserved site|IPR029047|Heat shock protein 70kD, peptide-binding domain|IPR029048|Heat shock protein 70kD, C-terminal domain|\N|\N|	1	0	1	2	0	1	0
c212	c212.a1	jgi|Tramen1|984637|fgenesh1_kg.13_#_1259_#_TRINITY_DN3985_c0_g4_i1|IPR004046|Glutathione S-transferase, C-terminal|IPR001662|Translation elongation factor EF1B, gamma chain, conserved|IPR004045|Glutathione S-transferase, N-terminal|IPR001662|Translation elongation factor EF1B, gamma chain, conserved|IPR004045|Glutathione S-transferase, N-terminal|IPR010987|Glutathione S-transferase, C-terminal-li…	1	0	3	0	1	0	0
c213	c213.a1	jgi|Tramen1|999637|fgenesh1_kg.21_#_51_#_TRINITY_DN2935_c0_g3_i1|IPR008030|NmrA-like domain|\N|\N|	1	0	0	2	0	2	0
c214	c214.a1	jgi|Tramen1|974261|fgenesh1_kg.9_#_2537_#_TRINITY_DN4460_c4_g2_i2|IPR000915|60S ribosomal protein L6E|IPR005568|Ribosomal protein L6, N-terminal|IPR000915|60S ribosomal protein L6E|IPR008991|Translation protein SH3-like domain|	1	0	2	0	2	0	0
c215	c215.a1	jgi|Tramen1|909372|e_gw1.6.478.1|3.2.1.45|METABOLIC|IPR001139|Glycoside hydrolase, family 30|IPR017853|Glycoside hydrolase superfamily|GH30_3||	1	0	0	4	0	0	0
c216	c216.a1	jgi|Tramen1|1057434|gm1.8646_g|3.1.3.2|METABOLIC|IPR029033|Histidine phosphatase superfamily|	1	0	0	4	0	0	0
c217	c217.a1	jgi|Tramen1|969197|fgenesh1_kg.8_#_688_#_TRINITY_DN4067_c1_g1_i1|IPR023798|Ribosomal protein S7 domain|IPR000235|Ribosomal protein S5/S7|IPR020606|Ribosomal protein S7, conserved site|IPR023798|Ribosomal protein S7 domain|IPR005716|Ribosomal protein S5/S7, eukaryotic/archaeal|	1	0	2	0	1	0	0
c218	c218.a1	jgi|Tramen1|910767|e_gw1.7.535.1|IPR010829|Cerato-platanin|IPR009009|RlpA-like double-psi beta-barrel domain|EXPN||	1	0	0	1	1	1	0
c219	c219.a1	jgi|Tramen1|1107075|estExt_Genemark1.C_190114|	1	0	0	2	0	1	0
c220	c220.a1	jgi|Tramen1|933722|fgenesh1_pg.14_#_160|\N|\N|	1	0	0	1	0	2	0
c221	c221.a1	jgi|Tramen1|934405|fgenesh1_pg.19_#_26|IPR006094|FAD linked oxidase, N-terminal|IPR012951|Berberine/berberine-like|IPR016166|FAD-binding, type 2|IPR016166|FAD-binding, type 2|	1	0	1	1	1	0	0
c222	c222.a1	jgi|Tramen1|924050|e_gw1.35.181.1|1.1.99.1|METABOLIC|IPR000172|Glucose-methanol-choline oxidoreductase, N-terminal|IPR007867|Glucose-methanol-choline oxidoreductase, C-terminal|IPR012132|Glucose-methanol-choline oxidoreductase|IPR000172|Glucose-methanol-choline oxidoreductase, N-terminal|\N|\N|\N|\N|AA3_2||	1	0	2	0	1	0	0
c223	c223.a1	jgi|Tramen1|52057|CE52056_3027|3.2.1.78|METABOLIC|IPR001547|Glycoside hydrolase, family 5|IPR017853|Glycoside hydrolase superfamily|GH5_7||	1	0	2	0	1	0	0
c224	c224.a1	jgi|Tramen1|926020|e_gw1.44.108.1|	1	0	0	1	2	0	0
c225	c225.a1	jgi|Tramen1|930863|fgenesh1_pg.3_#_388|IPR002136|Ribosomal protein L4/L1e|IPR025755|60S ribosomal protein L4, C-terminal domain|IPR013000|Ribosomal protein L4/L1e, eukaryotic/archaeal, conserved site|IPR023574|Ribosomal protein L4 domain|	1	0	2	0	1	0	0
c226	c226.a1	jgi|Tramen1|1050535|gm1.1747_g|1.1.1.37|METABOLIC|IPR001236|Lactate/malate dehydrogenase, N-terminal|IPR022383|Lactate/malate dehydrogenase, C-terminal|IPR001557|L-lactate/malate dehydrogenase|IPR001252|Malate dehydrogenase, active site|\N|\N|IPR015955|Lactate dehydrogenase/glycoside hydrolase, family 4, C-terminal|IPR010097|Malate dehydrogenase, type 1|	1	0	2	0	1	0	0
c227	c227.a1	jgi|Tramen1|923917|e_gw1.35.55.1|3.2.1.4|METABOLIC|IPR005103|Glycoside hydrolase, family 61|AA9||	1	0	2	0	1	0	0
c228	c228.a1	jgi|Tramen1|463241|CE463240_16778|2.5.1.18|METABOLIC|IPR004045|Glutathione S-transferase, N-terminal|IPR005442|Glutathione S-transferase, omega-class|IPR004045|Glutathione S-transferase, N-terminal|IPR010987|Glutathione S-transferase, C-terminal-like|IPR010987|Glutathione S-transferase, C-terminal-like|IPR012336|Thioredoxin-like fold|	1	0	0	0	1	2	0
c229	c229.a1	jgi|Tramen1|909456|e_gw1.6.848.1|	1	0	3	0	0	0	0
c230	c230.a1	jgi|Tramen1|1032914|fgenesh1_kg.51_#_121_#_TRINITY_DN1226_c0_g1_i1|3.2.1.20|METABOLIC|IPR000322|Glycoside hydrolase family 31|IPR030459|Glycosyl hydrolases family 31, conserved site|\N|\N|IPR017853|Glycoside hydrolase superfamily|IPR011013|Galactose mutarotase-like domain|GH31||	1	0	0	2	0	1	0
c231	c231.a1	jgi|Tramen1|995449|fgenesh1_kg.18_#_1471_#_TRINITY_DN4357_c2_g1_i1|4.2.1.11|METABOLIC|IPR020810|Enolase, C-terminal|IPR020811|Enolase, N-terminal|IPR000941|Enolase|IPR000941|Enolase|IPR020809|Enolase, conserved site|IPR029065|Enolase C-terminal domain-like|IPR029017|Enolase N-terminal domain-like|IPR000941|Enolase|	1	0	1	0	2	0	0
c232	c232.a1	jgi|Tramen1|511815|CE511814_359|	1	0	1	0	1	1	0
c233	c233.a1	jgi|Tramen1|910891|e_gw1.7.468.1|1.6.5.5|\N|IPR013149|Alcohol dehydrogenase, C-terminal|IPR013154|Alcohol dehydrogenase GroES-like|IPR020843|Polyketide synthase, enoylreductase domain|IPR011032|GroES (chaperonin 10)-like|\N|\N|	1	0	1	0	1	0	0
c234	c234.a1	jgi|Tramen1|926956|e_gw1.50.83.1|3.1.1.17|METABOLIC|IPR013658|SMP-30/Gluconolactonase/LRE-like region|\N|\N|	1	0	0	1	0	1	0
c235	c235.a1	jgi|Tramen1|905448|e_gw1.2.885.1|3.4.23.34|\N|IPR001461|Aspartic peptidase|IPR001461|Aspartic peptidase|IPR001969|Aspartic peptidase, active site|IPR021109|Aspartic peptidase domain|	1	0	0	2	0	0	0
c236	c236.a1	jgi|Tramen1|911959|e_gw1.8.369.1|IPR017853|Glycoside hydrolase superfamily|GH79||	1	0	2	0	0	0	0
c237	c237.a1	jgi|Tramen1|377270|CE377269_655|3.4.16.6|\N|IPR001563|Peptidase S10, serine carboxypeptidase|IPR001563|Peptidase S10, serine carboxypeptidase|IPR018202|Peptidase S10, serine carboxypeptidase, active site|IPR029058|Alpha/Beta hydrolase fold|	1	0	0	0	2	0	0
c238	c238.a1	jgi|Tramen1|918107|e_gw1.19.254.1|3.5.1.4|METABOLIC|IPR000120|Amidase|IPR023631|Amidase signature domain|	1	0	0	1	0	1	0
c239	c239.a1	jgi|Tramen1|384936|CE384935_5708|3.4.16.6|\N|IPR001563|Peptidase S10, serine carboxypeptidase|IPR001563|Peptidase S10, serine carboxypeptidase|IPR018202|Peptidase S10, serine carboxypeptidase, active site|IPR029058|Alpha/Beta hydrolase fold|	1	0	0	1	1	0	0
c240	c240.a1	jgi|Tramen1|271833|CE271832_19613|IPR008397|Alginate lyase domain|IPR008929|Chondroitin AC/alginate lyase|	1	0	0	0	2	0	0
c241	c241.a1	jgi|Tramen1|1013677|fgenesh1_kg.29_#_1298_#_TRINITY_DN1374_c0_g3_i1|6.3.4.5|METABOLIC|IPR001518|Argininosuccinate synthase|IPR018223|Argininosuccinate synthase, conserved site|IPR018223|Argininosuccinate synthase, conserved site|\N|\N|\N|\N|IPR001518|Argininosuccinate synthase|	1	0	2	0	0	0	0
c242	c242.a1	jgi|Tramen1|1148996|estExt_Genewise1.C_5_t20143|IPR006114|6-phosphogluconate dehydrogenase, C-terminal|IPR006115|6-phosphogluconate dehydrogenase, NADP-binding|IPR006113|6-phosphogluconate dehydrogenase, decarboxylating|\N|\N|IPR006184|6-phosphogluconate-binding site|IPR008927|6-phosphogluconate dehydrogenase, C-terminal-like|\N|\N|IPR006113|6-phosphogluconate dehydrogenase, decarboxylating|	1	0	1	1	0	0	0
c243	c243.a1	jgi|Tramen1|945663|fgenesh1_kg.2_#_1988_#_TRINITY_DN398_c0_g1_i2|3.4.16.6|\N|IPR001563|Peptidase S10, serine carboxypeptidase|IPR001563|Peptidase S10, serine carboxypeptidase|IPR018202|Peptidase S10, serine carboxypeptidase, active site|IPR029058|Alpha/Beta hydrolase fold|	1	0	0	2	0	0	0
c244	c244.a1	jgi|Tramen1|1054481|gm1.5693_g|	1	0	1	0	1	0	0

## Sheet: Compare PAI Lme1369 Q-Exa
Proteomics complementary data for Lme1369. Protein Abundance Index (PAI) in each condition (Maltose + Lignin and Lignin) at days 7 and 14 following the Q-Exactive analysis methods.
				Day3_Maltose+Lignin	Day3_Lignin	Day7_Maltose+Lignin	Day7_Lignin	Day14_Maltose+Lignin	Day14_Lignin
Group ID	Sub-group ID	Protein Description	Number of proteins	PAI
a1	a1.a1	jgi|Tramen1|932922|fgenesh1_pg.10_#_243|3.2.1.91|METABOLIC|IPR001722|Glycoside hydrolase. family 7|IPR001722|Glycoside hydrolase. family 7|IPR013320|Concanavalin A-like lectin/glucanase domain|GH7||	1	0.25	3.75	1.8	3.1	1.5	0.65
a1	a1.a2	jgi|Tramen1|927797|e_gw1.58.16.1|3.2.1.91|METABOLIC|IPR001722|Glycoside hydrolase. family 7|IPR001722|Glycoside hydrolase. family 7|IPR013320|Concanavalin A-like lectin/glucanase domain|GH7||	1	0.230769230769231	1.69230769230769	1.69230769230769	1.53846153846154	1.61538461538462	0.384615384615385
a1	a1.a3	jgi|Tramen1|536730|CE536729_14175|3.2.1.91|METABOLIC|IPR001722|Glycoside hydrolase. family 7|IPR001722|Glycoside hydrolase. family 7|IPR013320|Concanavalin A-like lectin/glucanase domain|GH7||	1	0.111111111111111	0.555555555555556	0.444444444444444	0.555555555555556	0.444444444444444	0.333333333333333
a2	a2.a1	jgi|Tramen1|761930|CE761929_14260|IPR014870|Domain of unknown function DUF1793|IPR008928|Six-hairpin glycosidase-like|	1	0.294117647058824	2.23529411764706	3	2.41176470588235	1.82352941176471	0.352941176470588
a2	a2.a2	jgi|Tramen1|762240|CE762239_7640|IPR014870|Domain of unknown function DUF1793|IPR008928|Six-hairpin glycosidase-like|	1		0.173913043478261	0.260869565217391	0.217391304347826	0.0869565217391304
a3	a3.a1	jgi|Tramen1|910254|e_gw1.6.982.1|3.2.1.3|METABOLIC|IPR002044|Carbohydrate binding module family 20|IPR011613|Glycoside hydrolase family 15|IPR008291|Glucoamylase. starch-binding|IPR000165|Glucoamylase|IPR002044|Carbohydrate binding module family 20|IPR002044|Carbohydrate binding module family 20|IPR008928|Six-hairpin glycosidase-like|IPR013784|Carbohydrate-binding-like fold|GH15-CBM20||	1	0.545454545454545	2.81818181818182	4.63636363636364	2.45454545454545	3	0.363636363636364
a4	a4.a1	jgi|Tramen1|911702|e_gw1.8.435.1|3.2.1.58|METABOLIC|\N|\N|IPR011050|Pectin lyase fold/virulence factor|GH55||	1	0.181818181818182	3.18181818181818	6	3.36363636363636	4.36363636363636	0.181818181818182
a5	a5.a1	jgi|Tramen1|1053769|gm1.4981_g|IPR002889|Carbohydrate-binding WSC|IPR018535|Domain of unknown function DUF1996|IPR002889|Carbohydrate-binding WSC|IPR013994|Carbohydrate-binding WSC. subgroup|	1	0.777777777777778	4	4.66666666666667	2.88888888888889	3	0.222222222222222
a5	a5.a2	jgi|Tramen1|1044932|fgenesh1_pm.12_#_185|IPR002889|Carbohydrate-binding WSC|IPR018535|Domain of unknown function DUF1996|IPR002889|Carbohydrate-binding WSC|IPR013994|Carbohydrate-binding WSC. subgroup|	1		0.625	0.875	0.5	0.625
a6	a6.a1	jgi|Tramen1|903895|e_gw1.1.702.1|3.2.1.58|METABOLIC|\N|\N|IPR011050|Pectin lyase fold/virulence factor|GH55||	1	0.3	3.4	3.7	3.1	2.7	0.2
a7	a7.a1	jgi|Tramen1|925293|e_gw1.40.151.1|3.2.1.59|\N|IPR005197|Glycoside hydrolase. family 71|GH71|fragment N-term;|	1	0.166666666666667	1.91666666666667	1.5	2	1.25	0.5
a8	a8.a1	jgi|Tramen1|459662|CE459661_1801|	1	0.0333333333333333	1.06666666666667	1.36666666666667	1.23333333333333	0.933333333333333	0.2
a9	a9.a1	jgi|Tramen1|945625|fgenesh1_kg.2_#_1950_#_TRINITY_DN3039_c1_g2_i2|IPR001938|Thaumatin|IPR001938|Thaumatin|IPR001938|Thaumatin|IPR001938|Thaumatin|IPR001938|Thaumatin|GH152||	1		7.33333333333333	10.6666666666667	11.6666666666667	9	0.333333333333333
a9	a9.a2	jgi|Tramen1|210347|CE210346_6263|IPR001938|Thaumatin|IPR001938|Thaumatin|IPR001938|Thaumatin|IPR001938|Thaumatin|IPR001938|Thaumatin|IPR001938|Thaumatin|GH152||	1		2.5	8	5.5	7
b10	b10.a1	jgi|Tramen1|1055153|gm1.6365_g|IPR012939|Glycosyl hydrolase family 92|IPR008928|Six-hairpin glycosidase-like|IPR005887|Alpha-1.2-mannosidase. putative|GH92||	1		0.85	1.65	1.2	1.25	0.05
b11	b11.a1	jgi|Tramen1|1041408|fgenesh1_pm.1_#_79|IPR002018|Carboxylesterase. type B|IPR019826|Carboxylesterase type B. active site|IPR029058|Alpha/Beta hydrolase fold|	1	0.2	1.7	1.7	2.3	1.2	0.3
b12	b12.a1	jgi|Tramen1|908445|e_gw1.5.711.1|IPR000254|Cellulose-binding domain. fungal|IPR000254|Cellulose-binding domain. fungal|\N|\N|IPR000254|Cellulose-binding domain. fungal|GH74-CBM1|fragment C-term;|	1		1.61904761904762	0.80952380952381	1.57142857142857	0.619047619047619	0.142857142857143
b13	b13.a1	jgi|Tramen1|1044554|fgenesh1_pm.10_#_214|1.10.3.3|METABOLIC|IPR001117|Multicopper oxidase. type 1|IPR011706|Multicopper oxidase. type 2|IPR011707|Multicopper oxidase. type 3|IPR002355|Multicopper oxidase. copper-binding site|IPR008972|Cupredoxin|AA1_1||	1		1	2	1	1.5
b13	b13.a2	jgi|Tramen1|924031|e_gw1.35.114.1|1.10.3.3|METABOLIC|IPR001117|Multicopper oxidase. type 1|IPR011706|Multicopper oxidase. type 2|IPR011707|Multicopper oxidase. type 3|IPR002355|Multicopper oxidase. copper-binding site|IPR008972|Cupredoxin|AA1_1||	1	0.1	0.5	1.4	0.5	1.1
b14	b14.a1	jgi|Tramen1|916190|e_gw1.15.98.1|1.1.99.18|\N|IPR000172|Glucose-methanol-choline oxidoreductase. N-terminal|IPR007867|Glucose-methanol-choline oxidoreductase. C-terminal|IPR000172|Glucose-methanol-choline oxidoreductase. N-terminal|IPR000172|Glucose-methanol-choline oxidoreductase. N-terminal|\N|\N|\N|\N|\N|\N|AA8-AA3_1||	1		1.25	0.6875	1.3125	0.625	0.375
b15	b15.a1	jgi|Tramen1|962822|fgenesh1_kg.6_#_1680_#_TRINITY_DN2405_c0_g1_i1|3.2.1.23|METABOLIC|IPR001944|Glycoside hydrolase. family 35|IPR018954|Beta-galactosidase. domain 2|IPR025972|Beta-galactosidase. domain 3|IPR025300|Beta-galactosidase jelly roll domain|IPR001944|Glycoside hydrolase. family 35|IPR018954|Beta-galactosidase. domain 2|IPR025972|Beta-galactosidase. domain 3|IPR008979|Galactose-binding d…	1	0.04	0.76	1.12	0.76	1.08	0.04
b15	b15.a2	jgi|Tramen1|1057549|gm1.8761_g|3.2.1.23|METABOLIC|IPR001944|Glycoside hydrolase. family 35|IPR018954|Beta-galactosidase. domain 2|IPR025972|Beta-galactosidase. domain 3|IPR025300|Beta-galactosidase jelly roll domain|IPR001944|Glycoside hydrolase. family 35|\N|\N|IPR018954|Beta-galactosidase. domain 2|IPR025972|Beta-galactosidase. domain 3|IPR008979|Galactose-binding domain-like|\N|\N|IPR017853|Gl…	1		0.15625	0.15625	0.125	0.15625	0.03125
b16	b16.a1	jgi|Tramen1|1056961|gm1.8173_g|IPR000250|Peptidase G1|IPR000250|Peptidase G1|IPR013320|Concanavalin A-like lectin/glucanase domain|	1		1	3	1.66666666666667	1.66666666666667	0.333333333333333
b17	b17.a1	jgi|Tramen1|909754|e_gw1.6.167.1|3.2.1.45|METABOLIC|IPR001139|Glycoside hydrolase. family 30|IPR017853|Glycoside hydrolase superfamily|GH30_3||	1		0.6875	1.1875	0.8125	0.875	0.1875
b18	b18.a1	jgi|Tramen1|1050431|gm1.1643_g|3.2.1.8|\N|IPR001000|Glycoside hydrolase. family 10|IPR000254|Cellulose-binding domain. fungal|IPR001000|Glycoside hydrolase. family 10|IPR000254|Cellulose-binding domain. fungal|\N|\N|IPR000254|Cellulose-binding domain. fungal|IPR000254|Cellulose-binding domain. fungal|IPR001000|Glycoside hydrolase. family 10|IPR017853|Glycoside hydrolase superfamily|IPR000254|Cell…	1		2.4	1	1.7	0.8	0.3
b18	b18.a2	jgi|Tramen1|438328|CE438327_6085|3.2.1.8|\N|IPR001000|Glycoside hydrolase. family 10|IPR000254|Cellulose-binding domain. fungal|IPR001000|Glycoside hydrolase. family 10|IPR000254|Cellulose-binding domain. fungal|\N|\N|IPR000254|Cellulose-binding domain. fungal|IPR000254|Cellulose-binding domain. fungal|IPR001000|Glycoside hydrolase. family 10|IPR017853|Glycoside hydrolase superfamily|IPR000254|Ce…	1		0.928571428571429	0.428571428571429	0.785714285714286	0.357142857142857	0.285714285714286
b19	b19.a1	jgi|Tramen1|920432|e_gw1.25.294.1|3.2.1.22|METABOLIC|IPR000111|Glycoside hydrolase. clan GH-D|IPR002241|Glycoside hydrolase. family 27|\N|\N|IPR017853|Glycoside hydrolase superfamily|GH27||	1	0.176470588235294	0.470588235294118	1.47058823529412	0.823529411764706	1	0.176470588235294
b20	b20.a1	jgi|Tramen1|271898|CE271897_2152|3.2.1.67|METABOLIC|IPR000743|Glycoside hydrolase. family 28|IPR000743|Glycoside hydrolase. family 28|IPR006626|Parallel beta-helix repeat|IPR011050|Pectin lyase fold/virulence factor|GH28||	1		1.6	2.2	2	1.6	0.1
b21	b21.a1	jgi|Tramen1|1059275|gm1.10487_g|IPR000757|Glycoside hydrolase. family 16|IPR013320|Concanavalin A-like lectin/glucanase domain|GH16||	1	0.5	2	3.5	2	1.75	0.25
b22	b22.a1	jgi|Tramen1|473590|CE473589_83153|3.4.16.6|\N|IPR001563|Peptidase S10. serine carboxypeptidase|IPR001563|Peptidase S10. serine carboxypeptidase|IPR018202|Peptidase S10. serine carboxypeptidase. active site|IPR029058|Alpha/Beta hydrolase fold|	1		0.875	1.75	1.125	1.375	0.125
b22	b22.a2	jgi|Tramen1|970552|fgenesh1_kg.8_#_2043_#_TRINITY_DN2774_c1_g1_i1|3.4.16.6|\N|IPR001563|Peptidase S10. serine carboxypeptidase|IPR001563|Peptidase S10. serine carboxypeptidase|IPR029058|Alpha/Beta hydrolase fold|	1		0.75	0.583333333333333	0.833333333333333	0.416666666666667
b22	b22.a3	jgi|Tramen1|959398|fgenesh1_kg.5_#_1864_#_TRINITY_DN3635_c1_g2_i4|3.4.16.6|\N|IPR001563|Peptidase S10. serine carboxypeptidase|IPR001563|Peptidase S10. serine carboxypeptidase|IPR018202|Peptidase S10. serine carboxypeptidase. active site|IPR029058|Alpha/Beta hydrolase fold|	1		0.4	0.8	0.4	0.8	0.2
b23	b23.a1	jgi|Tramen1|991746|fgenesh1_kg.16_#_2057_#_TRINITY_DN4489_c0_g1_i30|3.2.1.51|METABOLIC|IPR027414|Glycosyl hydrolase family. N-terminal domain|IPR016518|Alpha-L-fucosidase|IPR008928|Six-hairpin glycosidase-like|GH95||	1	0.111111111111111	0.611111111111111	1.5	0.888888888888889	0.944444444444444
b24	b24.a1	jgi|Tramen1|1017657|fgenesh1_kg.32_#_855_#_TRINITY_DN4805_c0_g1_i2|3.2.1.21|METABOLIC|IPR001764|Glycoside hydrolase. family 3. N-terminal|IPR002772|Glycoside hydrolase family 3 C-terminal domain|IPR026891|Fibronectin type III-like domain|IPR001764|Glycoside hydrolase. family 3. N-terminal|IPR017853|Glycoside hydrolase superfamily|IPR002772|Glycoside hydrolase family 3 C-terminal domain|GH3||	1		0.416666666666667	0.791666666666667	0.458333333333333	0.583333333333333	0.0416666666666667
b24	b24.a2	jgi|Tramen1|1089960|MIX30046_5258_56|3.2.1.21|METABOLIC|IPR001764|Glycoside hydrolase. family 3. N-terminal|IPR002772|Glycoside hydrolase family 3 C-terminal domain|IPR026891|Fibronectin type III-like domain|IPR001764|Glycoside hydrolase. family 3. N-terminal|IPR017853|Glycoside hydrolase superfamily|IPR002772|Glycoside hydrolase family 3 C-terminal domain|GH3||	1		0.423076923076923	0.269230769230769	0.423076923076923	0.192307692307692	0.0384615384615385
b25	b25.a1	jgi|Tramen1|453833|CE453832_622047|1.1.3.9|METABOLIC|IPR009880|Glyoxal oxidase. N-terminal|IPR015202|Domain of unknown function DUF1929|IPR011043|Galactose oxidase/kelch. beta-propeller|IPR014756|Immunoglobulin E-set|AA5_1||	1		0.9	2.4	1.6	1.6
b25	b25.a2	jgi|Tramen1|923081|e_gw1.32.82.1|IPR009880|Glyoxal oxidase. N-terminal|IPR015202|Domain of unknown function DUF1929|IPR011043|Galactose oxidase/kelch. beta-propeller|IPR014756|Immunoglobulin E-set|AA5_1||	1		0.416666666666667	1.33333333333333	0.833333333333333	0.75
b26	b26.a1	jgi|Tramen1|932960|fgenesh1_pg.11_#_35|3.2.1.59|\N|IPR002889|Carbohydrate-binding WSC|IPR009880|Glyoxal oxidase. N-terminal|IPR015202|Domain of unknown function DUF1929|IPR002889|Carbohydrate-binding WSC|IPR013994|Carbohydrate-binding WSC. subgroup|IPR011043|Galactose oxidase/kelch. beta-propeller|IPR014756|Immunoglobulin E-set|AA5_1||	1		0.25	1.5	0.5	0.8125
b27	b27.a1	jgi|Tramen1|149032|CE149031_19407|3.2.1.14|METABOLIC|IPR001223|Glycoside hydrolase. family 18. catalytic domain|IPR003610|Carbohydrate-binding module family 5/12|IPR001579|Glycoside hydrolase. chitinase active site|IPR003610|Carbohydrate-binding module family 5/12|IPR011583|Chitinase II|IPR003610|Carbohydrate-binding module family 5/12|IPR017853|Glycoside hydrolase superfamily|IPR029070|Chitinase…	1	0.1	1.9	0.7	1.4	0.8	0.1
b28	b28.a1	jgi|Tramen1|909011|e_gw1.5.414.1|IPR004886|Glucanosyltransferase|IPR009571|Actin cortical patch SUR7/pH-response regulator PalI|IPR012946|X8 domain|IPR012946|X8 domain|IPR017853|Glycoside hydrolase superfamily|GH72-CBM43||	1	0.333333333333333	1.33333333333333	2.66666666666667	2.16666666666667	1.66666666666667	0.333333333333333
b29	b29.a1	jgi|Tramen1|648965|CE648964_54632|3.4.14.9|\N|IPR000209|Peptidase S8/S53 domain|IPR015366|Peptidase S53. propeptide|IPR023828|Peptidase S8. subtilisin. Ser-active site|IPR030400|Sedolisin domain|IPR015366|Peptidase S53. propeptide|IPR000209|Peptidase S8/S53 domain|IPR009020|Proteinase inhibitor. propeptide|	1		0.5625	1.0625	0.6875	0.8125
b30	b30.a1	jgi|Tramen1|910310|e_gw1.7.719.1|IPR006045|Cupin 1|IPR013096|Cupin 2. conserved barrel|IPR006045|Cupin 1|IPR011051|RmlC-like cupin domain|IPR017774|Bicupin. oxalate decarboxylase/oxidase|	1		0.4	1.2	0.466666666666667	0.866666666666667	0.0666666666666667
b31	b31.a1	jgi|Tramen1|252873|CE252872_9929|3.2.1.14|METABOLIC|IPR001223|Glycoside hydrolase. family 18. catalytic domain|IPR001579|Glycoside hydrolase. chitinase active site|IPR017853|Glycoside hydrolase superfamily|GH18||	1		0.75	1.875	1.25	1.375	0.125
b32	b32.a1	jgi|Tramen1|919975|e_gw1.24.156.1|3.2.1.20|METABOLIC|IPR000322|Glycoside hydrolase family 31|IPR025887|Glycoside hydrolase family 31. N-terminal domain|IPR030459|Glycosyl hydrolases family 31. conserved site|\N|\N|IPR017853|Glycoside hydrolase superfamily|IPR011013|Galactose mutarotase-like domain|GH31||	1		0.516129032258065	0.67741935483871	0.483870967741935	0.516129032258065
b33	b33.a1	jgi|Tramen1|149160|CE149159_6218|3.2.1.1|METABOLIC|IPR006047|Glycosyl hydrolase. family 13. catalytic domain|IPR002044|Carbohydrate binding module family 20|IPR006048|Alpha-amylase. C-terminal all beta|IPR006046|Alpha amylase|IPR002044|Carbohydrate binding module family 20|IPR006048|Alpha-amylase. C-terminal all beta|IPR006589|Glycosyl hydrolase. family 13. subfamily. catalytic domain|IPR002044|C…	1		0.625	2.375	1.125	1.625
b34	b34.a1	jgi|Tramen1|912226|e_gw1.9.730.1|3.4.23.25|\N|IPR001461|Aspartic peptidase|IPR001461|Aspartic peptidase|IPR001969|Aspartic peptidase. active site|IPR021109|Aspartic peptidase domain|	1		0.352941176470588	1.17647058823529	0.588235294117647	1	0.0588235294117647
b35	b35.a1	jgi|Tramen1|923647|e_gw1.34.113.1|3.2.1.52|METABOLIC|IPR015883|Glycoside hydrolase family 20. catalytic core|IPR029019|Beta-hexosaminidase. eukaryotic type. N-terminal|IPR025705|Beta-hexosaminidase|IPR025705|Beta-hexosaminidase|IPR017853|Glycoside hydrolase superfamily|IPR029018|Chitobiase/beta-hexosaminidase domain 2-like|GH20||	1		1	0.8125	0.875	0.75
b36	b36.a1	jgi|Tramen1|46074|CE46073_3414|3.1.1.11|METABOLIC|IPR000070|Pectinesterase. catalytic|IPR018040|Pectinesterase. active site|IPR011050|Pectin lyase fold/virulence factor|CE8||	1		1	1.5	1	1
b37	b37.a1	jgi|Tramen1|910926|e_gw1.7.493.1|	1		0.777777777777778	1	1.11111111111111	0.888888888888889
b38	b38.a1	jgi|Tramen1|909147|e_gw1.5.41.1|IPR003159|Polysaccharide lyase family 8. central domain|IPR012970|Polysaccharide lyase 8. N-terminal alpha-helical|IPR008929|Chondroitin AC/alginate lyase|IPR011071|Polysaccharide lyase family 8-like. C-terminal|IPR011013|Galactose mutarotase-like domain|PL8_4||	1	0.117647058823529	0.882352941176471	0.764705882352941	0.882352941176471	0.529411764705882	0.176470588235294
b39	b39.a1	jgi|Tramen1|946666|fgenesh1_kg.2_#_2991_#_TRINITY_DN4200_c0_g1_i1|3.4.16.6|\N|IPR001563|Peptidase S10. serine carboxypeptidase|IPR001563|Peptidase S10. serine carboxypeptidase|IPR029058|Alpha/Beta hydrolase fold|	1		0.533333333333333	0.733333333333333	0.666666666666667	0.533333333333333	0.0666666666666667
b40	b40.a1	jgi|Tramen1|571985|CE571984_4189|3.2.1.22|METABOLIC|IPR000111|Glycoside hydrolase. clan GH-D|IPR002241|Glycoside hydrolase. family 27|IPR000111|Glycoside hydrolase. clan GH-D|\N|\N|IPR017853|Glycoside hydrolase superfamily|GH27||	1	0.2	0.4	0.8	0.6	0.8	0.2
b41	b41.a1	jgi|Tramen1|915133|e_gw1.13.58.1|IPR000743|Glycoside hydrolase. family 28|IPR011050|Pectin lyase fold/virulence factor|GH28||	1	0.125	1.25	0.75	0.75	0.625	0.375
b42	b42.a1	jgi|Tramen1|932245|fgenesh1_pg.8_#_86|3.2.1.39|METABOLIC|IPR017853|Glycoside hydrolase superfamily|GH17||	1	0.166666666666667	1.16666666666667	1.5	1.16666666666667	1.16666666666667	0.166666666666667
b43	b43.a1	jgi|Tramen1|923735|e_gw1.34.80.1|3.2.1.28|METABOLIC|IPR001661|Glycoside hydrolase. family 37|IPR001661|Glycoside hydrolase. family 37|IPR018232|Glycoside hydrolase. family 37. conserved site|IPR008928|Six-hairpin glycosidase-like|GH37||	1		0.260869565217391	0.434782608695652	0.652173913043478	0.347826086956522	0.0434782608695652
b44	b44.a1	jgi|Tramen1|534398|CE534397_113034|IPR012480|Heparinase II/III-like|IPR008929|Chondroitin AC/alginate lyase|	1	0.0588235294117647	0.352941176470588	0.764705882352941	0.764705882352941	0.705882352941177
b45	b45.a1	jgi|Tramen1|925544|e_gw1.41.5.1|3.2.1.113|METABOLIC|IPR001382|Glycoside hydrolase. family 47|IPR001382|Glycoside hydrolase. family 47|IPR001382|Glycoside hydrolase. family 47|GH47||	1	0.0476190476190476	0.476190476190476	0.428571428571429	0.380952380952381	0.476190476190476
b46	b46.a1	jgi|Tramen1|919050|e_gw1.21.219.1|3.2.1.67|METABOLIC|IPR000743|Glycoside hydrolase. family 28|IPR000743|Glycoside hydrolase. family 28|IPR006626|Parallel beta-helix repeat|IPR011050|Pectin lyase fold/virulence factor|GH28||	1		0.357142857142857	0.642857142857143	0.357142857142857	0.428571428571429
b47	b47.a1	jgi|Tramen1|913797|e_gw1.11.159.1|	1	0.0588235294117647	0.176470588235294	1	0.411764705882353	0.647058823529412
b48	b48.a1	jgi|Tramen1|1043262|fgenesh1_pm.6_#_105|IPR005135|Endonuclease/exonuclease/phosphatase|IPR005135|Endonuclease/exonuclease/phosphatase|	1	0.0476190476190476	0.285714285714286	0.80952380952381	0.333333333333333	0.380952380952381	0.0476190476190476
b49	b49.a1	jgi|Tramen1|20836|CE20835_4344|IPR006710|Glycoside hydrolase. family 43|IPR005084|Carbohydrate binding module family 6|IPR008979|Galactose-binding domain-like|IPR023296|Glycosyl hydrolase. five-bladed beta-propellor domain|GH43-CBM35||	1		0.4	1.2	0.7	0.7
b50	b50.a1	jgi|Tramen1|915930|e_gw1.14.456.1|3.2.1.55|METABOLIC|IPR010720|Alpha-L-arabinofuranosidase. C-terminal|IPR010720|Alpha-L-arabinofuranosidase. C-terminal|IPR017853|Glycoside hydrolase superfamily|GH51||	1		0.444444444444444	0.722222222222222	0.5	0.5
b51	b51.a1	jgi|Tramen1|1049265|gm1.477_g|3.2.1.1|METABOLIC|IPR006047|Glycosyl hydrolase. family 13. catalytic domain|IPR015340|Alpha-amylase. domain of unknown function DUF1966. C-terminal|\N|\N|IPR006589|Glycosyl hydrolase. family 13. subfamily. catalytic domain|\N|\N|IPR017853|Glycoside hydrolase superfamily|GH13_1||	1		0.833333333333333	0.916666666666667	1.08333333333333	0.416666666666667
b52	b52.a1	jgi|Tramen1|996560|fgenesh1_kg.19_#_436_#_TRINITY_DN3740_c0_g1_i4|IPR005135|Endonuclease/exonuclease/phosphatase|IPR005135|Endonuclease/exonuclease/phosphatase|	1		0.333333333333333	0.866666666666667	0.266666666666667	1
b53	b53.a1	jgi|Tramen1|1050025|gm1.1237_g|3.2.1.4|METABOLIC|IPR005103|Glycoside hydrolase. family 61|AA9||	1		2	1	2	1	0.5
b54	b54.a1	jgi|Tramen1|1046069|fgenesh1_pm.21_#_75|IPR001087|GDSL lipase/esterase|IPR000254|Cellulose-binding domain. fungal|IPR000254|Cellulose-binding domain. fungal|IPR000254|Cellulose-binding domain. fungal|IPR000254|Cellulose-binding domain. fungal|IPR013830|SGNH hydrolase-type esterase domain|IPR000254|Cellulose-binding domain. fungal|CBM1-CE16||	1	0.166666666666667	1.66666666666667	0.166666666666667	0.5	0.333333333333333	0.166666666666667
b55	b55.a1	jgi|Tramen1|553163|CE553162_5504|IPR002594|Glycoside hydrolase. family 12|IPR013320|Concanavalin A-like lectin/glucanase domain|GH12||	1		0.5	0.5	0.5	0.75	0.5
b56	b56.a1	jgi|Tramen1|925617|e_gw1.42.206.1|3.2.1.58|METABOLIC|IPR001547|Glycoside hydrolase. family 5|IPR017853|Glycoside hydrolase superfamily|GH5_9||	1		1.25	1.5	1.25	1.5
b57	b57.a1	jgi|Tramen1|1051772|gm1.2984_g|IPR005629|Beta-glucan synthesis-associated. SKN1|IPR013320|Concanavalin A-like lectin/glucanase domain|GH16||	1		0.35	0.45	0.45	0.35
b58	b58.a1	jgi|Tramen1|1050433|gm1.1645_g|3.2.1.8|\N|IPR001000|Glycoside hydrolase. family 10|IPR000254|Cellulose-binding domain. fungal|IPR001000|Glycoside hydrolase. family 10|IPR000254|Cellulose-binding domain. fungal|\N|\N|IPR000254|Cellulose-binding domain. fungal|IPR000254|Cellulose-binding domain. fungal|IPR001000|Glycoside hydrolase. family 10|IPR017853|Glycoside hydrolase superfamily|IPR000254|Cell…	1		1.42857142857143	1.14285714285714	1.42857142857143	0.571428571428571	0.142857142857143
b59	b59.a1	jgi|Tramen1|906608|e_gw1.3.474.1|3.4.23.5|\N|IPR001461|Aspartic peptidase|IPR001461|Aspartic peptidase|IPR001969|Aspartic peptidase. active site|IPR021109|Aspartic peptidase domain|	1		0.625	2	0.625	0.5
b60	b60.a1	jgi|Tramen1|945672|fgenesh1_kg.2_#_1997_#_TRINITY_DN3166_c0_g1_i4|IPR002018|Carboxylesterase. type B|IPR019826|Carboxylesterase type B. active site|IPR029058|Alpha/Beta hydrolase fold|	1		0.6	0.533333333333333	0.466666666666667	0.466666666666667	0.0666666666666667
b61	b61.a1	jgi|Tramen1|1043750|fgenesh1_pm.7_#_287|3.2.1.14|METABOLIC|IPR003610|Carbohydrate-binding module family 5/12|IPR001579|Glycoside hydrolase. chitinase active site|IPR003610|Carbohydrate-binding module family 5/12|IPR003610|Carbohydrate-binding module family 5/12|IPR017853|Glycoside hydrolase superfamily|GH18-CBM5||	1		1.5	2.75	1	0.5
b61	b61.a2	jgi|Tramen1|683786|CE683785_495|3.2.1.14|METABOLIC|IPR003610|Carbohydrate-binding module family 5/12|IPR001579|Glycoside hydrolase. chitinase active site|IPR003610|Carbohydrate-binding module family 5/12|IPR003610|Carbohydrate-binding module family 5/12|IPR017853|Glycoside hydrolase superfamily|GH18-CBM5||	1		1.25	1	0.5	0.5
b62	b62.a1	jgi|Tramen1|1054356|gm1.5568_g|IPR005629|Beta-glucan synthesis-associated. SKN1|IPR013320|Concanavalin A-like lectin/glucanase domain|GH16||	1		0.291666666666667	0.208333333333333	0.541666666666667	0.208333333333333
b63	b63.a1	jgi|Tramen1|1044995|fgenesh1_pm.13_#_56|IPR006045|Cupin 1|IPR006045|Cupin 1|IPR011051|RmlC-like cupin domain|IPR017774|Bicupin. oxalate decarboxylase/oxidase|	1		0.111111111111111	0.722222222222222	0.222222222222222	0.388888888888889	0.0555555555555556
b64	b64.a1	jgi|Tramen1|920195|e_gw1.24.81.1|3.4.14.9|\N|IPR000209|Peptidase S8/S53 domain|IPR015366|Peptidase S53. propeptide|IPR030400|Sedolisin domain|IPR015366|Peptidase S53. propeptide|IPR000209|Peptidase S8/S53 domain|IPR009020|Proteinase inhibitor. propeptide|	1		0.333333333333333	0.8	0.266666666666667	0.333333333333333
b64	b64.a2	jgi|Tramen1|1067507|MIX7593_17674_49|3.4.14.9|\N|IPR000209|Peptidase S8/S53 domain|IPR015366|Peptidase S53. propeptide|IPR030400|Sedolisin domain|IPR015366|Peptidase S53. propeptide|IPR000209|Peptidase S8/S53 domain|IPR009020|Proteinase inhibitor. propeptide|	1		0.0555555555555556	0.0555555555555556	0.0555555555555556	0.0555555555555556
b64	b64.a3	jgi|Tramen1|1047608|fgenesh1_pm.37_#_1|3.4.14.9|\N|IPR000209|Peptidase S8/S53 domain|IPR015366|Peptidase S53. propeptide|IPR030400|Sedolisin domain|IPR015366|Peptidase S53. propeptide|IPR000209|Peptidase S8/S53 domain|IPR009020|Proteinase inhibitor. propeptide|	1		0.0625	0.0625	0.125
b65	b65.a1	jgi|Tramen1|913295|e_gw1.10.172.1|3.1.27.1|\N|IPR001568|Ribonuclease T2-like|IPR018188|Ribonuclease T2. active site|IPR018188|Ribonuclease T2. active site|IPR001568|Ribonuclease T2-like|	1		0.5	1	0.75	0.5
b66	b66.a1	jgi|Tramen1|440450|CE440449_3143|3.2.1.21|METABOLIC|IPR001764|Glycoside hydrolase. family 3. N-terminal|IPR002772|Glycoside hydrolase family 3 C-terminal domain|IPR026891|Fibronectin type III-like domain|IPR001764|Glycoside hydrolase. family 3. N-terminal|IPR017853|Glycoside hydrolase superfamily|IPR002772|Glycoside hydrolase family 3 C-terminal domain|GH3||	1		0.259259259259259	0.222222222222222	0.444444444444444	0.185185185185185
b67	b67.a1	jgi|Tramen1|903967|e_gw1.1.260.1|IPR000254|Cellulose-binding domain. fungal|IPR016288|1. 4-beta cellobiohydrolase|IPR016288|1. 4-beta cellobiohydrolase|IPR016288|1. 4-beta cellobiohydrolase|IPR000254|Cellulose-binding domain. fungal|IPR001524|Glycoside hydrolase. family 6. conserved site|IPR001524|Glycoside hydrolase. family 6. conserved site|IPR000254|Cellulose-binding domain. fungal|IPR000254|C…	1		1.08333333333333	0.416666666666667	0.25	0.166666666666667
b68	b68.a1	jgi|Tramen1|917503|e_gw1.18.7.1|3.2.1.52|METABOLIC|IPR015883|Glycoside hydrolase family 20. catalytic core|IPR015882|Beta-hexosaminidase. bacteial type. N-terminal|IPR025705|Beta-hexosaminidase|IPR017853|Glycoside hydrolase superfamily|IPR029018|Chitobiase/beta-hexosaminidase domain 2-like|GH20||	1		0.5	0.25	0.291666666666667	0.166666666666667
b69	b69.a1	jgi|Tramen1|1015879|fgenesh1_kg.31_#_132_#_TRINITY_DN694_c0_g1_i4|3.4.14.9|\N|IPR000209|Peptidase S8/S53 domain|IPR015366|Peptidase S53. propeptide|IPR023828|Peptidase S8. subtilisin. Ser-active site|IPR030400|Sedolisin domain|IPR015366|Peptidase S53. propeptide|IPR000209|Peptidase S8/S53 domain|IPR009020|Proteinase inhibitor. propeptide|	1	0.0625	0.25	0.5	0.25	0.375
b70	b70.a1	jgi|Tramen1|1055626|gm1.6838_g|IPR029045|ClpP/crotonase-like domain|	1		0.08	0.44	0.2	0.32
b71	b71.a1	jgi|Tramen1|1057537|gm1.8749_g|3.1.1.3|METABOLIC|IPR002018|Carboxylesterase. type B|IPR019826|Carboxylesterase type B. active site|IPR019819|Carboxylesterase type B. conserved site|IPR029058|Alpha/Beta hydrolase fold|	1		0.642857142857143	0.571428571428571	0.428571428571429	0.214285714285714	0.142857142857143
b72	b72.a1	jgi|Tramen1|936461|fgenesh1_pg.35_#_74|\N|\N|IPR017853|Glycoside hydrolase superfamily|GH79||	1		0.4	0.466666666666667	0.333333333333333	0.4
b73	b73.a1	jgi|Tramen1|1012263|fgenesh1_kg.28_#_1173_#_TRINITY_DN3995_c0_g3_i1|3.2.1.4|METABOLIC|IPR001547|Glycoside hydrolase. family 5|IPR000254|Cellulose-binding domain. fungal|IPR000254|Cellulose-binding domain. fungal|IPR018087|Glycoside hydrolase. family 5. conserved site|IPR000254|Cellulose-binding domain. fungal|IPR000254|Cellulose-binding domain. fungal|IPR017853|Glycoside hydrolase superfamily|IPR…	1		2.2	0.6	1.4	0.4
b74	b74.a1	jgi|Tramen1|954139|fgenesh1_kg.4_#_420_#_TRINITY_DN4791_c3_g8_i1|IPR010829|Cerato-platanin|IPR009009|RlpA-like double-psi beta-barrel domain|EXPN||	1		1	2	7	3	1
b75	b75.a1	jgi|Tramen1|314359|CE314358_15995|3.4.-.-|METABOLIC|IPR008758|Peptidase S28|IPR029058|Alpha/Beta hydrolase fold|	1		0.375	0.375	0.3125	0.625
b76	b76.a1	jgi|Tramen1|1021585|fgenesh1_kg.35_#_1085_#_TRINITY_DN1955_c0_g1_i2|IPR012939|Glycosyl hydrolase family 92|IPR008928|Six-hairpin glycosidase-like|IPR005887|Alpha-1.2-mannosidase. putative|GH92||	1		0.0454545454545455	0.5	0.409090909090909	0.227272727272727
b77	b77.a1	jgi|Tramen1|927121|e_gw1.52.127.1|1.1.99.1|METABOLIC|IPR000172|Glucose-methanol-choline oxidoreductase. N-terminal|IPR007867|Glucose-methanol-choline oxidoreductase. C-terminal|IPR012132|Glucose-methanol-choline oxidoreductase|IPR000172|Glucose-methanol-choline oxidoreductase. N-terminal|IPR000172|Glucose-methanol-choline oxidoreductase. N-terminal|\N|\N|\N|\N|AA3_2||	1		0.416666666666667	0.833333333333333	0.416666666666667	0.333333333333333
b78	b78.a1	jgi|Tramen1|1059556|gm1.10768_g|IPR012878|Protein of unknown function DUF1680|IPR008928|Six-hairpin glycosidase-like|	1		0.315789473684211	0.421052631578947	0.263157894736842	0.210526315789474	0.0526315789473684
b79	b79.a1	jgi|Tramen1|1057480|gm1.8692_g|3.2.1.99|\N|IPR006710|Glycoside hydrolase. family 43|IPR016840|Glycoside hydrolase. family 43. endo-1. 5-alpha-L-arabinosidase|IPR023296|Glycosyl hydrolase. five-bladed beta-propellor domain|GH43||	1		2	2	3	2
b80	b80.a1	jgi|Tramen1|934318|fgenesh1_pg.18_#_90|3.2.1.20|METABOLIC|IPR000322|Glycoside hydrolase family 31|IPR030458|Glycosyl hydrolases family 31. active site|IPR030459|Glycosyl hydrolases family 31. conserved site|\N|\N|IPR017853|Glycoside hydrolase superfamily|IPR011013|Galactose mutarotase-like domain|GH31||	1		0.0833333333333333	0.208333333333333	0.208333333333333	0.375	0.0416666666666667
b81	b81.a1	jgi|Tramen1|1053950|gm1.5162_g|GH115||	1		0.108108108108108	0.135135135135135	0.108108108108108	0.135135135135135
b81	b81.a2	jgi|Tramen1|915222|e_gw1.13.314.1|GH115||	1		0.0294117647058824	0.0882352941176471		0.0882352941176471
b82	b82.a1	jgi|Tramen1|931673|fgenesh1_pg.6_#_125|3.2.1.4|METABOLIC|IPR000254|Cellulose-binding domain. fungal|IPR005103|Glycoside hydrolase. family 61|IPR000254|Cellulose-binding domain. fungal|IPR000254|Cellulose-binding domain. fungal|IPR000254|Cellulose-binding domain. fungal|IPR000254|Cellulose-binding domain. fungal|AA9-CBM1||	1		2.5	0.5	0.5
b82	b82.a2	jgi|Tramen1|1057183|gm1.8395_g|3.2.1.4|METABOLIC|IPR005103|Glycoside hydrolase. family 61|AA9||	1		0.5	0.166666666666667	0.833333333333333	0.166666666666667
b83	b83.a1	jgi|Tramen1|924816|e_gw1.38.107.1|3.2.1.14|METABOLIC|IPR001223|Glycoside hydrolase. family 18. catalytic domain|IPR001579|Glycoside hydrolase. chitinase active site|IPR011583|Chitinase II|IPR017853|Glycoside hydrolase superfamily|IPR029070|Chitinase insertion domain|GH18||	1	0.2	0.4	1.4	0.6	0.6
b84	b84.a1	jgi|Tramen1|1042341|fgenesh1_pm.3_#_236|3.1.1.72|\N|IPR000254|Cellulose-binding domain. fungal|\N|\N|IPR000254|Cellulose-binding domain. fungal|IPR000254|Cellulose-binding domain. fungal|IPR000254|Cellulose-binding domain. fungal|IPR029058|Alpha/Beta hydrolase fold|IPR000254|Cellulose-binding domain. fungal|IPR010126|Esterase. PHB depolymerase|CBM1-CE1||	1		3	1.66666666666667	2	0.666666666666667
b84	b84.a2	jgi|Tramen1|693655|CE693654_30928|3.1.1.72|\N|IPR000254|Cellulose-binding domain. fungal|\N|\N|IPR000254|Cellulose-binding domain. fungal|IPR000254|Cellulose-binding domain. fungal|IPR000254|Cellulose-binding domain. fungal|IPR029058|Alpha/Beta hydrolase fold|IPR000254|Cellulose-binding domain. fungal|IPR010126|Esterase. PHB depolymerase|CBM1-CE1||	1		1
b85	b85.a1	jgi|Tramen1|923580|e_gw1.34.299.1|3.2.1.99|\N|IPR006710|Glycoside hydrolase. family 43|IPR016840|Glycoside hydrolase. family 43. endo-1. 5-alpha-L-arabinosidase|IPR023296|Glycosyl hydrolase. five-bladed beta-propellor domain|GH43||	1			4.33333333333333		1.66666666666667
b86	b86.a1	jgi|Tramen1|655533|CE655532_48498|3.4.23.5|\N|IPR001461|Aspartic peptidase|IPR001461|Aspartic peptidase|IPR001969|Aspartic peptidase. active site|IPR021109|Aspartic peptidase domain|	1		0.8	0.8	1.2
b86	b86.a2	jgi|Tramen1|1042137|fgenesh1_pm.3_#_32|3.4.23.5|\N|IPR001461|Aspartic peptidase|IPR001461|Aspartic peptidase|IPR001969|Aspartic peptidase. active site|IPR021109|Aspartic peptidase domain|	1		0.75	0.5	0.75	0.5	0.25
b87	b87.a1	jgi|Tramen1|922366|e_gw1.30.162.1|IPR009486|Purine nucleoside permease|	1		0.375	0.625	0.5	0.375
b88	b88.a1	jgi|Tramen1|1050920|gm1.2132_g|3.2.1.4|METABOLIC|IPR005103|Glycoside hydrolase. family 61|AA9||	1	0.166666666666667	1.5	0.5	0.333333333333333	0.166666666666667
b89	b89.a1	jgi|Tramen1|1045116|fgenesh1_pm.14_#_25|	1		0.25	0.625	0.5	0.5
b90	b90.a1	jgi|Tramen1|1045814|fgenesh1_pm.19_#_20|\N|\N|IPR009078|Ferritin-like superfamily|	1		0.333333333333333	0.266666666666667	0.466666666666667	0.266666666666667
b91	b91.a1	jgi|Tramen1|201128|CE201127_3072|1.11.1.6|METABOLIC|IPR011614|Catalase core domain|IPR010582|Catalase immune-responsive domain|IPR024711|Catalase. mono-functional. haem-containing. clades 1 and 3|IPR018028|Catalase. mono-functional. haem-containing|IPR002226|Catalase haem-binding site|IPR024708|Catalase active site|IPR018028|Catalase. mono-functional. haem-containing|IPR011614|Catalase core domai…	1			0.173913043478261	0.173913043478261	0.260869565217391
b91	b91.a2	jgi|Tramen1|1045326|fgenesh1_pm.15_#_69|1.11.1.6|METABOLIC|IPR011614|Catalase core domain|IPR010582|Catalase immune-responsive domain|IPR024711|Catalase. mono-functional. haem-containing. clades 1 and 3|IPR018028|Catalase. mono-functional. haem-containing|IPR002226|Catalase haem-binding site|IPR024708|Catalase active site|IPR018028|Catalase. mono-functional. haem-containing|IPR011614|Catalase cor…	1		0.142857142857143	0.0952380952380952	0.0952380952380952	0.0952380952380952
b92	b92.a1	jgi|Tramen1|916947|e_gw1.17.444.1|3.4.14.9|\N|IPR015366|Peptidase S53. propeptide|IPR023828|Peptidase S8. subtilisin. Ser-active site|IPR030400|Sedolisin domain|IPR015366|Peptidase S53. propeptide|IPR000209|Peptidase S8/S53 domain|IPR009020|Proteinase inhibitor. propeptide|	1		0.3125	0.4375	0.1875	0.3125
b93	b93.a1	jgi|Tramen1|1048269|fgenesh1_pm.50_#_1|3.2.1.58|METABOLIC|IPR001547|Glycoside hydrolase. family 5|IPR017853|Glycoside hydrolase superfamily|GH5_9||	1		0.142857142857143	0.238095238095238	0.333333333333333	0.19047619047619
b94	b94.a1	jgi|Tramen1|911470|e_gw1.8.306.1|3.2.1.78|METABOLIC|IPR001547|Glycoside hydrolase. family 5|IPR000254|Cellulose-binding domain. fungal|IPR000254|Cellulose-binding domain. fungal|IPR018087|Glycoside hydrolase. family 5. conserved site|IPR000254|Cellulose-binding domain. fungal|IPR000254|Cellulose-binding domain. fungal|IPR017853|Glycoside hydrolase superfamily|IPR000254|Cellulose-binding domain. f…	1		5	5	6
b95	b95.a1	jgi|Tramen1|1018647|fgenesh1_kg.33_#_472_#_TRINITY_DN4583_c2_g1_i4|3.1.1.11|METABOLIC|IPR000070|Pectinesterase. catalytic|IPR011050|Pectin lyase fold/virulence factor|CE8||	1		0.1875	0.375	0.0625	0.4375	0.0625
b96	b96.a1	jgi|Tramen1|986102|fgenesh1_kg.13_#_2724_#_TRINITY_DN4667_c1_g2_i1|1.2.1.12|METABOLIC|IPR020828|Glyceraldehyde 3-phosphate dehydrogenase. NAD(P) binding domain|IPR020829|Glyceraldehyde 3-phosphate dehydrogenase. catalytic domain|IPR020831|Glyceraldehyde/Erythrose phosphate dehydrogenase family|IPR020831|Glyceraldehyde/Erythrose phosphate dehydrogenase family|IPR020830|Glyceraldehyde 3-phosphate d…	1		0.533333333333333	0.133333333333333	0.466666666666667	0.0666666666666667
b97	b97.a1	jgi|Tramen1|946461|fgenesh1_kg.2_#_2786_#_TRINITY_DN3889_c0_g4_i3|3.5.1.41|METABOLIC|IPR002509|Polysaccharide deacetylase|IPR002509|Polysaccharide deacetylase|IPR011330|Glycoside hydrolase/deacetylase. beta/alpha-barrel|CE4||	1		0.555555555555556	0.222222222222222	0.555555555555556	0.333333333333333
b97	b97.a2	jgi|Tramen1|908440|e_gw1.5.113.1|IPR002509|Polysaccharide deacetylase|IPR002509|Polysaccharide deacetylase|IPR011330|Glycoside hydrolase/deacetylase. beta/alpha-barrel|CE4||	1		0.25	0.25	0.25	0.125
b98	b98.a1	jgi|Tramen1|566630|CE566629_4635|3.2.1.14|METABOLIC|IPR003610|Carbohydrate-binding module family 5/12|IPR001579|Glycoside hydrolase. chitinase active site|IPR003610|Carbohydrate-binding module family 5/12|IPR003610|Carbohydrate-binding module family 5/12|IPR017853|Glycoside hydrolase superfamily|GH18-CBM5-CBM5|fragment N-term;|	1		0.75	1.5	0.5	0.5
b99	b99.a1	jgi|Tramen1|918294|e_gw1.19.419.1|IPR001087|GDSL lipase/esterase|IPR013830|SGNH hydrolase-type esterase domain|	1		0.111111111111111	1	0.111111111111111	0.333333333333333
c100	c100.a1	jgi|Tramen1|933693|fgenesh1_pg.14_#_131|3.2.1.4|METABOLIC|IPR001547|Glycoside hydrolase. family 5|IPR000254|Cellulose-binding domain. fungal|IPR018087|Glycoside hydrolase. family 5. conserved site|IPR000254|Cellulose-binding domain. fungal|IPR000254|Cellulose-binding domain. fungal|IPR017853|Glycoside hydrolase superfamily|IPR000254|Cellulose-binding domain. fungal|CBM1-GH5_5||	1		2	0.666666666666667	1.66666666666667	0.666666666666667
c101	c101.a1	jgi|Tramen1|913301|e_gw1.10.265.1|3.4.24.20|\N|IPR029463|Lysine-specific metallo-endopeptidase|\N|\N|	1		0.222222222222222	0.555555555555556	0.222222222222222	0.555555555555556	0.111111111111111
c102	c102.a1	jgi|Tramen1|907994|e_gw1.4.635.1|\N|\N|	1		0.103448275862069	0.206896551724138	0.137931034482759	0.137931034482759
c103	c103.a1	jgi|Tramen1|912220|e_gw1.9.316.1|3.4.23.25|\N|IPR001461|Aspartic peptidase|IPR001461|Aspartic peptidase|IPR001969|Aspartic peptidase. active site|IPR021109|Aspartic peptidase domain|	1		0.615384615384615		0.692307692307692
c104	c104.a1	jgi|Tramen1|934157|fgenesh1_pg.17_#_99|3.2.1.14|METABOLIC|IPR001223|Glycoside hydrolase. family 18. catalytic domain|IPR001683|Phox homologous domain|IPR001579|Glycoside hydrolase. chitinase active site|IPR001683|Phox homologous domain|IPR001683|Phox homologous domain|IPR011583|Chitinase II|IPR017853|Glycoside hydrolase superfamily|IPR001683|Phox homologous domain|GH18||	1		0.181818181818182	0.454545454545455	0.272727272727273	0.272727272727273
c105	c105.a1	jgi|Tramen1|402450|CE402449_2999|3.2.1.22|METABOLIC|IPR000254|Cellulose-binding domain. fungal|IPR000111|Glycoside hydrolase. clan GH-D|IPR002241|Glycoside hydrolase. family 27|IPR000111|Glycoside hydrolase. clan GH-D|IPR000254|Cellulose-binding domain. fungal|IPR000254|Cellulose-binding domain. fungal|IPR000254|Cellulose-binding domain. fungal|\N|\N|IPR017853|Glycoside hydrolase superfamily|IPR0…	1		0.625	0.375	0.625	0.25
c106	c106.a1	jgi|Tramen1|917735|e_gw1.18.48.1|IPR011330|Glycoside hydrolase/deacetylase. beta/alpha-barrel|	1	0.125	0.375	0.5	0.625	0.25
c107	c107.a1	jgi|Tramen1|714048|CE714047_102866|3.2.1.14|METABOLIC|IPR001223|Glycoside hydrolase. family 18. catalytic domain|IPR001579|Glycoside hydrolase. chitinase active site|IPR011583|Chitinase II|IPR017853|Glycoside hydrolase superfamily|IPR029070|Chitinase insertion domain|GH18||	1		0.285714285714286	0.857142857142857	0.428571428571429	0.285714285714286
c108	c108.a1	jgi|Tramen1|922359|e_gw1.30.281.1|3.2.1.67|METABOLIC|IPR000743|Glycoside hydrolase. family 28|IPR011050|Pectin lyase fold/virulence factor|GH28||	1		0.263157894736842	0.263157894736842	0.157894736842105	0.157894736842105
c109	c109.a1	jgi|Tramen1|287220|CE287219_13028|3.1.1.3|METABOLIC|IPR002921|Fungal lipase-like domain|IPR029058|Alpha/Beta hydrolase fold|	1		0.857142857142857	0.857142857142857	0.428571428571429
c110	c110.a1	jgi|Tramen1|435586|CE435585_6484|3.4.16.6|\N|IPR001563|Peptidase S10. serine carboxypeptidase|IPR001563|Peptidase S10. serine carboxypeptidase|IPR018202|Peptidase S10. serine carboxypeptidase. active site|IPR029058|Alpha/Beta hydrolase fold|	1	0.125	0.25	0.625	0.375	0.375	0.125
c111	c111.a1	jgi|Tramen1|917268|e_gw1.17.462.1|3.4.-.-|METABOLIC|IPR008758|Peptidase S28|IPR029058|Alpha/Beta hydrolase fold|	1		0.142857142857143	0.357142857142857	0.285714285714286	0.285714285714286
c112	c112.a1	jgi|Tramen1|915947|e_gw1.14.438.1|3.2.1.8|\N|IPR001137|Glycoside hydrolase. family 11|IPR000254|Cellulose-binding domain. fungal|IPR001137|Glycoside hydrolase. family 11|IPR000254|Cellulose-binding domain. fungal|IPR018208|Glycoside hydrolase. family 11. active site|IPR018208|Glycoside hydrolase. family 11. active site|IPR000254|Cellulose-binding domain. fungal|IPR000254|Cellulose-binding domain.…	1		1.33333333333333	1	0.666666666666667	0.666666666666667
c113	c113.a1	jgi|Tramen1|416753|CE416752_12378|IPR010905|Glycosyl hydrolase. family 88|IPR008928|Six-hairpin glycosidase-like|GH88||	1		0.4	0.5	0.3	0.2	0.1
c114	c114.a1	jgi|Tramen1|917744|e_gw1.18.126.1|\N|\N|IPR013830|SGNH hydrolase-type esterase domain|	1		0.5	0.4	0.1	0.4
c115	c115.a1	jgi|Tramen1|445511|CE445510_9948|3.4.21.48|\N|IPR000209|Peptidase S8/S53 domain|IPR010259|Peptidase S8 propeptide/proteinase inhibitor I9|IPR015500|Peptidase S8. subtilisin-related|IPR023827|Peptidase S8. subtilisin. Asp-active site|IPR022398|Peptidase S8. subtilisin. His-active site|IPR023828|Peptidase S8. subtilisin. Ser-active site|IPR000209|Peptidase S8/S53 domain|IPR009020|Proteinase inhibit…	1		0.666666666666667	0.5	0.5	0.666666666666667
c116	c116.a1	jgi|Tramen1|919067|e_gw1.21.332.1|3.5.1.23|METABOLIC|IPR006823|Neutral/alkaline nonlysosomal ceramidase|	1		0.272727272727273	0.181818181818182	0.0909090909090909	0.0909090909090909
c117	c117.a1	jgi|Tramen1|995287|fgenesh1_kg.18_#_1309_#_TRINITY_DN4276_c2_g2_i8|3.2.1.25|METABOLIC|IPR008979|Galactose-binding domain-like|IPR017853|Glycoside hydrolase superfamily|GH2||	1			0.304347826086957	0.0434782608695652	0.260869565217391
c118	c118.a1	jgi|Tramen1|196704|CE196703_2803|3.2.1.67|METABOLIC|IPR000743|Glycoside hydrolase. family 28|IPR000743|Glycoside hydrolase. family 28|IPR011050|Pectin lyase fold/virulence factor|GH28||	1		0.375	0.1875	0.125	0.1875
c119	c119.a1	jgi|Tramen1|95318|CE95317_32730|3.2.1.4|METABOLIC|IPR005103|Glycoside hydrolase. family 61|AA9||	1		2	1	1.33333333333333	0.333333333333333
c120	c120.a1	jgi|Tramen1|904269|e_gw1.1.455.1|2.7.4.6|METABOLIC|IPR001564|Nucleoside diphosphate kinase|IPR001564|Nucleoside diphosphate kinase|IPR023005|Nucleoside diphosphate kinase. active site|IPR001564|Nucleoside diphosphate kinase|IPR001564|Nucleoside diphosphate kinase|	1		0.5	0.125	0.625	0.25	0.125
c121	c121.a1	jgi|Tramen1|909032|e_gw1.5.758.1|3.2.1.21|METABOLIC|IPR000254|Cellulose-binding domain. fungal|IPR001764|Glycoside hydrolase. family 3. N-terminal|IPR002772|Glycoside hydrolase family 3 C-terminal domain|IPR026891|Fibronectin type III-like domain|IPR001764|Glycoside hydrolase. family 3. N-terminal|IPR000254|Cellulose-binding domain. fungal|IPR000254|Cellulose-binding domain. fungal|IPR017853|Glyc…	1		0.315789473684211	0.0526315789473684	0.315789473684211
c122	c122.a1	jgi|Tramen1|924929|e_gw1.38.87.1|3.1.1.3|METABOLIC|IPR002921|Fungal lipase-like domain|IPR029058|Alpha/Beta hydrolase fold|	1		1.75	0.25	0.5	0.25
c123	c123.a1	jgi|Tramen1|121074|CE121073_15765|IPR000757|Glycoside hydrolase. family 16|IPR013320|Concanavalin A-like lectin/glucanase domain|GH16||	1		0.5	0.5	0.5
c124	c124.a1	jgi|Tramen1|1058397|gm1.9609_g|IPR009291|Vacuolar protein sorting-associated protein 62|	1	0.166666666666667	0.5	0.5	0.5	0.333333333333333
c125	c125.a1	jgi|Tramen1|914914|e_gw1.12.266.1|IPR005151|Tail specific protease|IPR029045|ClpP/crotonase-like domain|	1		0.142857142857143	0.19047619047619	0.0952380952380952	0.142857142857143
c126	c126.a1	jgi|Tramen1|1041809|fgenesh1_pm.2_#_63|3.2.1.8|\N|IPR001000|Glycoside hydrolase. family 10|IPR001000|Glycoside hydrolase. family 10|\N|\N|IPR001000|Glycoside hydrolase. family 10|IPR017853|Glycoside hydrolase superfamily|GH10||	1		0.8	0.1	0.2	0.1
c127	c127.a1	jgi|Tramen1|912218|e_gw1.9.492.1|3.2.1.89|\N|IPR011683|Glycosyl hydrolase family 53|IPR017853|Glycoside hydrolase superfamily|GH53||	1		0.444444444444444	0.666666666666667	0.222222222222222
c128	c128.a1	jgi|Tramen1|1049410|gm1.622_g|IPR001087|GDSL lipase/esterase|IPR013830|SGNH hydrolase-type esterase domain|CE16|fragment C-term;|	1		0.4	0.8	0.6	0.2
c129	c129.a1	jgi|Tramen1|929521|fgenesh1_pg.1_#_14|3.2.1.58|METABOLIC|IPR001547|Glycoside hydrolase. family 5|IPR017853|Glycoside hydrolase superfamily|GH5_9||	1		0.130434782608696	0.130434782608696	0.130434782608696	0.130434782608696
c130	c130.a1	jgi|Tramen1|511119|CE511118_2184|	1		0.375	0.125	0.375	0.125	0.375
c131	c131.a1	jgi|Tramen1|958305|fgenesh1_kg.5_#_771_#_TRINITY_DN2066_c1_g2_i3|IPR000757|Glycoside hydrolase. family 16|IPR013320|Concanavalin A-like lectin/glucanase domain|GH16||	1		0.333333333333333	0.5	0.5	0.333333333333333	0.166666666666667
c132	c132.a1	jgi|Tramen1|926168|e_gw1.45.158.1|IPR012480|Heparinase II/III-like|IPR008929|Chondroitin AC/alginate lyase|	1		0.0714285714285714	0.357142857142857	0.285714285714286	0.0714285714285714
c133	c133.a1	jgi|Tramen1|977038|fgenesh1_kg.10_#_2381_#_TRINITY_DN825_c0_g1_i1|3.2.1.37|METABOLIC|IPR001764|Glycoside hydrolase. family 3. N-terminal|IPR002772|Glycoside hydrolase family 3 C-terminal domain|IPR026891|Fibronectin type III-like domain|IPR017853|Glycoside hydrolase superfamily|IPR002772|Glycoside hydrolase family 3 C-terminal domain|GH3||	1		0.16	0.12	0.08	0.08
c134	c134.a1	jgi|Tramen1|921049|e_gw1.27.224.1|IPR000254|Cellulose-binding domain. fungal|IPR000254|Cellulose-binding domain. fungal|IPR000254|Cellulose-binding domain. fungal|IPR000254|Cellulose-binding domain. fungal|IPR029058|Alpha/Beta hydrolase fold|IPR000254|Cellulose-binding domain. fungal|CBM1-CE15||	1		0.444444444444444	0.444444444444444	0.111111111111111	0.222222222222222
c135	c135.a1	jgi|Tramen1|921208|e_gw1.27.347.1|\N|\N|IPR009078|Ferritin-like superfamily|	1		1	3	2	2
c136	c136.a1	jgi|Tramen1|438038|CE438037_1180|3.4.24.39|\N|IPR001384|Peptidase M35. deuterolysin|IPR001384|Peptidase M35. deuterolysin|\N|\N|	1		0.0769230769230769	0.0769230769230769	0.153846153846154	0.0769230769230769	0.0769230769230769
c137	c137.a1	jgi|Tramen1|1050121|gm1.1333_g|1.1.3.9|METABOLIC|IPR009880|Glyoxal oxidase. N-terminal|IPR015202|Domain of unknown function DUF1929|IPR011043|Galactose oxidase/kelch. beta-propeller|IPR014756|Immunoglobulin E-set|AA5_1||	1		0.2		0.4
c138	c138.a1	jgi|Tramen1|936816|fgenesh1_pg.39_#_32|IPR001296|Glycosyl transferase. family 1|\N|\N|GT4||	1		0.161290322580645	0.032258064516129	0.0967741935483871		0.032258064516129
c139	c139.a1	jgi|Tramen1|1049283|gm1.495_g|3.2.1.50|METABOLIC|IPR024733|Alpha-N-acetylglucosaminidase. tim-barrel domain|IPR024240|Alpha-N-acetylglucosaminidase. N-terminal|IPR024732|Alpha-N-acetylglucosaminidase. C-terminal|GH89||	1		0.238095238095238	0.0952380952380952	0.0952380952380952	0.0476190476190476
c140	c140.a1	jgi|Tramen1|910169|e_gw1.6.865.1|IPR013830|SGNH hydrolase-type esterase domain|	1		0.25	0.375	0.25	0.125	0.125
c141	c141.a1	jgi|Tramen1|914139|e_gw1.11.563.1|3.4.24.-|\N|IPR001842|Peptidase M36. fungalysin|IPR011096|FTP domain|IPR001842|Peptidase M36. fungalysin|\N|\N|	1		0.0714285714285714	0.214285714285714	0.214285714285714	0.142857142857143
c142	c142.a1	jgi|Tramen1|438279|CE438278_3222|	1			0.4		0.2
c143	c143.a1	jgi|Tramen1|1006560|fgenesh1_kg.25_#_158_#_TRINITY_DN2750_c0_g3_i2|3.1.1.7|METABOLIC|IPR002018|Carboxylesterase. type B|IPR019826|Carboxylesterase type B. active site|IPR019819|Carboxylesterase type B. conserved site|IPR029058|Alpha/Beta hydrolase fold|	1		0.368421052631579		0.0526315789473684	0.0526315789473684
c144	c144.a1	jgi|Tramen1|1043148|fgenesh1_pm.5_#_330|IPR003159|Polysaccharide lyase family 8. central domain|IPR004103|Polysaccharide lyase family 8. C-terminal|IPR012970|Polysaccharide lyase 8. N-terminal alpha-helical|IPR008929|Chondroitin AC/alginate lyase|IPR011071|Polysaccharide lyase family 8-like. C-terminal|IPR011013|Galactose mutarotase-like domain|PL8_4||	1		0.0526315789473684	0.210526315789474	0.105263157894737	0.105263157894737
c145	c145.a1	jgi|Tramen1|48830|CE48829_15481|3.1.3.8|METABOLIC|IPR000560|Histidine phosphatase superfamily. clade-2|IPR000560|Histidine phosphatase superfamily. clade-2|IPR029033|Histidine phosphatase superfamily|	1		0.153846153846154	0.230769230769231	0.153846153846154	0.153846153846154
c146	c146.a1	jgi|Tramen1|497583|CE497582_14065|3.2.1.4|METABOLIC|IPR005103|Glycoside hydrolase. family 61|AA9||	1		1.25	0.5
c147	c147.a1	jgi|Tramen1|988378|fgenesh1_kg.15_#_525_#_TRINITY_DN2165_c0_g2_i3|IPR004843|Calcineurin-like phosphoesterase domain. apaH type|IPR029052|Metallo-dependent phosphatase-like|	1		0.0769230769230769	0.307692307692308	0.0769230769230769	0.230769230769231
c148	c148.a1	jgi|Tramen1|1092621|MIX32707_14607_77|IPR002594|Glycoside hydrolase. family 12|IPR013320|Concanavalin A-like lectin/glucanase domain|GH12||	1		0.5	0.75	1
c149	c149.a1	jgi|Tramen1|1057715|gm1.8927_g|5.1.3.3|METABOLIC|IPR008183|Aldose 1-/Glucose-6-phosphate 1-epimerase|IPR011013|Galactose mutarotase-like domain|	1		0.5	0.5	0.125
c150	c150.a1	jgi|Tramen1|1058666|gm1.9878_g|1.6.5.5|\N|IPR013149|Alcohol dehydrogenase. C-terminal|IPR013154|Alcohol dehydrogenase GroES-like|IPR020843|Polyketide synthase. enoylreductase domain|IPR011032|GroES (chaperonin 10)-like|\N|\N|	1		0.384615384615385	0.0769230769230769	0.153846153846154
c151	c151.a1	jgi|Tramen1|926306|e_gw1.46.116.1|3.4.23.34|\N|IPR001461|Aspartic peptidase|IPR001461|Aspartic peptidase|IPR001969|Aspartic peptidase. active site|IPR021109|Aspartic peptidase domain|	1		0.142857142857143	0.428571428571429	0.142857142857143	0.142857142857143
c151	c151.a2	jgi|Tramen1|926359|e_gw1.46.142.1|3.4.23.34|\N|IPR001461|Aspartic peptidase|IPR001461|Aspartic peptidase|IPR001969|Aspartic peptidase. active site|IPR021109|Aspartic peptidase domain|	1		0.333333333333333	0.666666666666667	0.333333333333333	0.666666666666667
c152	c152.a1	jgi|Tramen1|915534|e_gw1.13.145.1|IPR013320|Concanavalin A-like lectin/glucanase domain|GH16||	1		0.5	0.75	0.75
c153	c153.a1	jgi|Tramen1|1046503|fgenesh1_pm.25_#_48|3.2.1.4|METABOLIC|IPR005103|Glycoside hydrolase. family 61|AA9||	1		1	0.5	0.5
c153	c153.a2	jgi|Tramen1|1048317|fgenesh1_pm.52_#_6|3.2.1.4|METABOLIC|IPR005103|Glycoside hydrolase. family 61|AA9||	1			0.5		0.166666666666667
c154	c154.a1	jgi|Tramen1|678729|CE678728_66127|3.2.1.58|METABOLIC|IPR000490|Glycoside hydrolase. family 17|IPR017853|Glycoside hydrolase superfamily|GH17||	1		0.25	0.75	0.5	0.5
c155	c155.a1	jgi|Tramen1|1072083|MIX12169_3236_61|IPR006094|FAD linked oxidase. N-terminal|IPR012951|Berberine/berberine-like|IPR016166|FAD-binding. type 2|IPR016166|FAD-binding. type 2|	1		0.2	0.3	0.2	0.1
c156	c156.a1	jgi|Tramen1|910166|e_gw1.6.760.1|3.4.23.1|\N|IPR001461|Aspartic peptidase|IPR001461|Aspartic peptidase|IPR001969|Aspartic peptidase. active site|IPR021109|Aspartic peptidase domain|	1			1.33333333333333	0.333333333333333	1
c157	c157.a1	jgi|Tramen1|250112|CE250111_13610|IPR001087|GDSL lipase/esterase|IPR013830|SGNH hydrolase-type esterase domain|CE16||	1		0.428571428571429	0.285714285714286	0.285714285714286
c158	c158.a1	jgi|Tramen1|1057569|gm1.8781_g|IPR000254|Cellulose-binding domain. fungal|IPR000254|Cellulose-binding domain. fungal|IPR000254|Cellulose-binding domain. fungal|IPR000254|Cellulose-binding domain. fungal|GH131-CBM1||	1		0.8	0.2	0.2	0.2
c159	c159.a1	jgi|Tramen1|1121803|estExt_fgenesh1_pg.C_250028|1.1.1.1|METABOLIC|IPR013149|Alcohol dehydrogenase. C-terminal|IPR013154|Alcohol dehydrogenase GroES-like|IPR020843|Polyketide synthase. enoylreductase domain|IPR011032|GroES (chaperonin 10)-like|\N|\N|	1		0.0714285714285714	0.142857142857143	0.142857142857143	0.142857142857143
c160	c160.a1	jgi|Tramen1|926878|e_gw1.49.13.1|IPR019405|Lactonase. 7-bladed beta propeller|\N|\N|	1		0.0909090909090909	0.181818181818182	0.0909090909090909	0.181818181818182	0.0909090909090909
c161	c161.a1	jgi|Tramen1|965364|fgenesh1_kg.7_#_707_#_TRINITY_DN4198_c1_g1_i1|3.4.23.5|\N|IPR001461|Aspartic peptidase|IPR001461|Aspartic peptidase|IPR001969|Aspartic peptidase. active site|IPR021109|Aspartic peptidase domain|	1		0.333333333333333	0.333333333333333	0.166666666666667	0.166666666666667
c162	c162.a1	jgi|Tramen1|1097277|MIX37363_15512_64|1.6.99.1|\N|IPR001155|NADH:flavin oxidoreductase/NADH oxidase. N-terminal|\N|\N|	1		0.0588235294117647	0.0588235294117647	0.176470588235294	0.117647058823529
c163	c163.a1	jgi|Tramen1|909220|e_gw1.5.634.1|IPR001351|Ribosomal protein S3. C-terminal|IPR004044|K Homology domain. type 2|IPR018280|Ribosomal protein S3. conserved site|IPR004044|K Homology domain. type 2|IPR009019|K homology domain. prokaryotic type|IPR001351|Ribosomal protein S3. C-terminal|IPR005703|Ribosomal protein S3. eukaryotic/archaeal|	1		0.230769230769231		0.230769230769231	0.0769230769230769
c164	c164.a1	jgi|Tramen1|231638|CE231637_517|3.4.23.34|\N|IPR001461|Aspartic peptidase|IPR001461|Aspartic peptidase|IPR001969|Aspartic peptidase. active site|IPR021109|Aspartic peptidase domain|	1		0.2	0.1	0.2	0.1
c165	c165.a1	jgi|Tramen1|1056219|gm1.7431_g|IPR002053|Glycoside hydrolase. family 25|IPR008270|Glycoside hydrolase. family 25. active site|IPR018077|Glycoside hydrolase. family 25 subgroup|IPR017853|Glycoside hydrolase superfamily|GH25||	1		0.333333333333333	0.666666666666667	0.666666666666667	0.666666666666667
c166	c166.a1	jgi|Tramen1|907521|e_gw1.4.219.1|IPR024655|Uncharacterised protein family. glycosyl hydrolase catalytic domain|\N|\N|IPR017853|Glycoside hydrolase superfamily|GH128||	1		0.3	0.1	0.2	0.1
c167	c167.a1	jgi|Tramen1|1042214|fgenesh1_pm.3_#_109|IPR012939|Glycosyl hydrolase family 92|IPR008928|Six-hairpin glycosidase-like|IPR005887|Alpha-1.2-mannosidase. putative|GH92||	1			0.25		0.333333333333333
c168	c168.a1	jgi|Tramen1|532967|CE532966_32329|3.2.1.4|METABOLIC|IPR001547|Glycoside hydrolase. family 5|IPR000254|Cellulose-binding domain. fungal|IPR000254|Cellulose-binding domain. fungal|IPR018087|Glycoside hydrolase. family 5. conserved site|IPR000254|Cellulose-binding domain. fungal|IPR000254|Cellulose-binding domain. fungal|IPR017853|Glycoside hydrolase superfamily|IPR000254|Cellulose-binding domain. f…	1		0.666666666666667	0.333333333333333	1	0.333333333333333
c169	c169.a1	jgi|Tramen1|1055353|gm1.6565_g|IPR001223|Glycoside hydrolase. family 18. catalytic domain|IPR001579|Glycoside hydrolase. chitinase active site|IPR017853|Glycoside hydrolase superfamily|GH18||	1			0.285714285714286	0.285714285714286	0.142857142857143
c170	c170.a1	jgi|Tramen1|926733|e_gw1.49.150.1|IPR019405|Lactonase. 7-bladed beta propeller|\N|\N|	1		0.166666666666667	0.333333333333333	0.5	0.166666666666667
c171	c171.a1	jgi|Tramen1|904845|e_gw1.2.510.1|IPR009009|RlpA-like double-psi beta-barrel domain|IPR007112|Expansin/pollen allergen. DPBB domain|\N|\N|IPR009009|RlpA-like double-psi beta-barrel domain|GH45||	1		0.666666666666667	0.333333333333333	1.33333333333333
c172	c172.a1	jgi|Tramen1|1087844|MIX27930_11059_45|IPR023210|NADP-dependent oxidoreductase domain|IPR020471|Aldo/keto reductase subgroup|IPR020471|Aldo/keto reductase subgroup|IPR018170|Aldo/keto reductase. conserved site|IPR023210|NADP-dependent oxidoreductase domain|	1		0.117647058823529	0.0588235294117647	0.117647058823529	0.0588235294117647
c173	c173.a1	jgi|Tramen1|984677|fgenesh1_kg.13_#_1299_#_TRINITY_DN55_c0_g1_i3|IPR017853|Glycoside hydrolase superfamily|	1		0.125	0.125		0.125
c174	c174.a1	jgi|Tramen1|668678|CE668677_587|1.13.11.5|METABOLIC|IPR005708|Homogentisate 1.2-dioxygenase|IPR011051|RmlC-like cupin domain|IPR005708|Homogentisate 1.2-dioxygenase|	1		0.0769230769230769	0.0384615384615385	0.0769230769230769	0.0384615384615385
c175	c175.a1	jgi|Tramen1|1048304|fgenesh1_pm.51_#_13|IPR000172|Glucose-methanol-choline oxidoreductase. N-terminal|IPR007867|Glucose-methanol-choline oxidoreductase. C-terminal|IPR012132|Glucose-methanol-choline oxidoreductase|IPR000172|Glucose-methanol-choline oxidoreductase. N-terminal|IPR000172|Glucose-methanol-choline oxidoreductase. N-terminal|\N|\N|\N|\N|AA3_2||	1			0.285714285714286	0.142857142857143
c176	c176.a1	jgi|Tramen1|948616|fgenesh1_kg.2_#_4941_#_TRINITY_DN3493_c0_g1_i7|3.2.1.58|METABOLIC|IPR001547|Glycoside hydrolase. family 5|IPR017853|Glycoside hydrolase superfamily|GH5_15|(fragment) splicing problem;|	1		0.222222222222222	0.222222222222222		0.222222222222222
c177	c177.a1	jgi|Tramen1|453444|CE453443_8924|3.1.27.1|\N|IPR001568|Ribonuclease T2-like|IPR018188|Ribonuclease T2. active site|IPR018188|Ribonuclease T2. active site|IPR001568|Ribonuclease T2-like|	1		0.2		0.3	0.1
c178	c178.a1	jgi|Tramen1|1056275|gm1.7487_g|3.4.16.2|\N|IPR008758|Peptidase S28|IPR029058|Alpha/Beta hydrolase fold|	1			0.133333333333333	0.0666666666666667	0.2
c179	c179.a1	jgi|Tramen1|952259|fgenesh1_kg.3_#_3191_#_TRINITY_DN2794_c0_g1_i2|3.4.14.9|\N|IPR000209|Peptidase S8/S53 domain|IPR015366|Peptidase S53. propeptide|IPR030400|Sedolisin domain|IPR015366|Peptidase S53. propeptide|IPR000209|Peptidase S8/S53 domain|IPR009020|Proteinase inhibitor. propeptide|	1		0.181818181818182	0.272727272727273	0.0909090909090909
c180	c180.a1	jgi|Tramen1|908080|e_gw1.4.493.1|IPR008313|Uncharacterised conserved protein UCP028846|IPR008313|Uncharacterised conserved protein UCP028846|IPR008928|Six-hairpin glycosidase-like|GH125||	1			0.272727272727273		0.181818181818182
c181	c181.a1	jgi|Tramen1|1042251|fgenesh1_pm.3_#_146|	1		0.0833333333333333	0.166666666666667	0.0833333333333333	0.0833333333333333
c182	c182.a1	jgi|Tramen1|437597|CE437596_5750|1.1.3.13|METABOLIC|IPR000172|Glucose-methanol-choline oxidoreductase. N-terminal|IPR007867|Glucose-methanol-choline oxidoreductase. C-terminal|IPR012132|Glucose-methanol-choline oxidoreductase|IPR000172|Glucose-methanol-choline oxidoreductase. N-terminal|IPR000172|Glucose-methanol-choline oxidoreductase. N-terminal|\N|\N|\N|\N|AA3_3||	1		0.09375		0.0625
c183	c183.a1	jgi|Tramen1|147665|CE147664_1622|IPR008928|Six-hairpin glycosidase-like|	1		0.0666666666666667	0.0666666666666667	0.0666666666666667	0.133333333333333
c184	c184.a1	jgi|Tramen1|1105316|estExt_Genemark1.C_100154|2.7.1.40|METABOLIC|IPR015793|Pyruvate kinase. barrel|IPR015795|Pyruvate kinase. C-terminal|IPR001697|Pyruvate kinase|IPR018209|Pyruvate kinase. active site|IPR011037|Pyruvate kinase-like. insert domain|IPR015813|Pyruvate/Phosphoenolpyruvate kinase-like domain|IPR015795|Pyruvate kinase. C-terminal|IPR001697|Pyruvate kinase|	1		0.125		0.0833333333333333
c185	c185.a1	jgi|Tramen1|906931|e_gw1.3.1187.1|AA14||	1			0.3	0.1	0.1
c186	c186.a1	jgi|Tramen1|1046738|fgenesh1_pm.27_#_64|IPR013810|Ribosomal protein S5. N-terminal|IPR005324|Ribosomal protein S5. C-terminal|IPR018192|Ribosomal protein S5. N-terminal. conserved site|IPR013810|Ribosomal protein S5. N-terminal|IPR020568|Ribosomal protein S5 domain 2-type fold|\N|\N|IPR005711|Ribosomal protein S5. eukaryotic/archaeal|	1		0.181818181818182		0.272727272727273
c187	c187.a1	jgi|Tramen1|326091|CE326090_934|3.1.1.3|METABOLIC|IPR002018|Carboxylesterase. type B|IPR019826|Carboxylesterase type B. active site|IPR029058|Alpha/Beta hydrolase fold|	1		0.2		0.133333333333333
c188	c188.a1	jgi|Tramen1|1052862|gm1.4074_g|2.1.1.14|METABOLIC|IPR002629|Cobalamin-independent methionine synthase MetE. C-terminal/archaeal|IPR013215|Cobalamin-independent methionine synthase MetE. N-terminal|IPR006276|Cobalamin-independent methionine synthase|\N|\N|IPR006276|Cobalamin-independent methionine synthase|	1		0.0882352941176471		0.0294117647058824	0.0294117647058824
c189	c189.a1	jgi|Tramen1|1052329|gm1.3541_g|PL14_5||	1		0.2	0.4	0.2	0.2
c190	c190.a1	jgi|Tramen1|954400|fgenesh1_kg.4_#_681_#_TRINITY_DN4752_c1_g1_i1|IPR021131|Ribosomal protein L18e/L15P|IPR021131|Ribosomal protein L18e/L15P|	1		0.5		0.333333333333333
c191	c191.a1	jgi|Tramen1|916898|e_gw1.17.54.1|3.4.14.4|\N|\N|\N|IPR005317|Dipeptidyl-peptidase 3|	1		0.111111111111111		0.0277777777777778
c192	c192.a1	jgi|Tramen1|1043671|fgenesh1_pm.7_#_208|3.4.14.9|\N|IPR000209|Peptidase S8/S53 domain|IPR015366|Peptidase S53. propeptide|IPR030400|Sedolisin domain|IPR015366|Peptidase S53. propeptide|IPR000209|Peptidase S8/S53 domain|IPR009020|Proteinase inhibitor. propeptide|	1			0.230769230769231		0.153846153846154
c193	c193.a1	jgi|Tramen1|937822|fgenesh1_pg.63_#_4|IPR000782|FAS1 domain|IPR000782|FAS1 domain|IPR000782|FAS1 domain|IPR000782|FAS1 domain|	1			0.0588235294117647	0.117647058823529	0.117647058823529
c194	c194.a1	jgi|Tramen1|1059517|gm1.10729_g|1.1.1.37|METABOLIC|IPR001236|Lactate/malate dehydrogenase. N-terminal|IPR022383|Lactate/malate dehydrogenase. C-terminal|IPR001557|L-lactate/malate dehydrogenase|IPR001252|Malate dehydrogenase. active site|\N|\N|IPR015955|Lactate dehydrogenase/glycoside hydrolase. family 4. C-terminal|IPR010097|Malate dehydrogenase. type 1|	1		0.0714285714285714	0.0714285714285714	0.142857142857143	0.0714285714285714
c195	c195.a1	jgi|Tramen1|1025298|fgenesh1_kg.39_#_584_#_TRINITY_DN1911_c0_g2_i1|IPR008972|Cupredoxin|	1			0.428571428571429	0.285714285714286
c196	c196.a1	jgi|Tramen1|128808|CE128807_325|IPR017996|Major royal jelly protein/Protein yellow|\N|\N|	1			0.272727272727273		0.181818181818182
c197	c197.a1	jgi|Tramen1|989957|fgenesh1_kg.16_#_268_#_TRINITY_DN4376_c0_g1_i7|	1		0.25	0.5		0.5
c198	c198.a1	jgi|Tramen1|52020|CE52019_49549|IPR003172|MD-2-related lipid-recognition domain|IPR003172|MD-2-related lipid-recognition domain|IPR014756|Immunoglobulin E-set|	1		0.142857142857143	0.285714285714286	0.142857142857143
c199	c199.a1	jgi|Tramen1|1103242|estExt_Genemark1.C_40041|IPR010829|Cerato-platanin|IPR009009|RlpA-like double-psi beta-barrel domain|EXPN||	1				1
c200	c200.a1	jgi|Tramen1|1020511|fgenesh1_kg.35_#_11_#_TRINITY_DN286_c0_g1_i1|IPR004000|Actin family|IPR004000|Actin family|IPR004001|Actin. conserved site|IPR004001|Actin. conserved site|IPR020902|Actin/actin-like conserved site|IPR004000|Actin family|\N|\N|	1			0.0714285714285714	0.0714285714285714	0.0714285714285714	0.0714285714285714
c201	c201.a1	jgi|Tramen1|932017|fgenesh1_pg.7_#_165|AA14||	1			0.166666666666667	0.333333333333333	0.166666666666667
c202	c202.a1	jgi|Tramen1|908497|e_gw1.5.172.1|IPR000795|Elongation factor. GTP-binding domain|IPR004160|Translation elongation factor EFTu/EF1A. C-terminal|IPR004161|Translation elongation factor EFTu/EF1A. domain 2|IPR000795|Elongation factor. GTP-binding domain|IPR000795|Elongation factor. GTP-binding domain|IPR009000|Translation protein. beta-barrel domain|IPR009001|Translation elongation factor EF1A/initi…	1		0.0666666666666667	0.0666666666666667		0.0666666666666667	0.0666666666666667
c203	c203.a1	jgi|Tramen1|971010|fgenesh1_kg.8_#_2501_#_TRINITY_DN3440_c0_g2_i1|IPR001865|Ribosomal protein S2|IPR001865|Ribosomal protein S2|IPR018130|Ribosomal protein S2. conserved site|IPR018130|Ribosomal protein S2. conserved site|IPR023591|Ribosomal protein S2. flavodoxin-like domain|IPR005707|Ribosomal protein S2. eukaryotic/archaeal|	1		0.0769230769230769		0.153846153846154	0.0769230769230769
c204	c204.a1	jgi|Tramen1|1055291|gm1.6503_g|	1	0.111111111111111		0.111111111111111	0.222222222222222
c205	c205.a1	jgi|Tramen1|924154|e_gw1.36.350.1|IPR006094|FAD linked oxidase. N-terminal|IPR012951|Berberine/berberine-like|IPR006093|Oxygen oxidoreductase covalent FAD-binding site|IPR016166|FAD-binding. type 2|IPR016166|FAD-binding. type 2|	1		0.105263157894737		0.105263157894737
c206	c206.a1	jgi|Tramen1|1115561|estExt_fgenesh1_pm.C_300071|2.5.1.16|METABOLIC|IPR001045|Spermidine/spermine synthases|IPR005097|Saccharopine dehydrogenase / Homospermidine synthase|IPR030373|Polyamine biosynthesis domain. conserved site|IPR030374|Polyamine biosynthesis domain|\N|\N|IPR029063|S-adenosyl-L-methionine-dependent methyltransferase|\N|\N|IPR001045|Spermidine/spermine synthases|	1		0.0882352941176471		0.0294117647058824
c207	c207.a1	jgi|Tramen1|915972|e_gw1.14.379.1|1.2.1.3|METABOLIC|IPR015590|Aldehyde dehydrogenase domain|IPR016160|Aldehyde dehydrogenase. cysteine active site|IPR029510|Aldehyde dehydrogenase. glutamic acid active site|IPR016161|Aldehyde/histidinol dehydrogenase|	1		0.0476190476190476		0.0476190476190476	0.0476190476190476	0.0476190476190476
c208	c208.a1	jgi|Tramen1|921891|e_gw1.29.156.1|3.1.3.5|METABOLIC|IPR002828|Survival protein SurE-like phosphatase/nucleotidase|IPR002828|Survival protein SurE-like phosphatase/nucleotidase|	1			0.5	0.25	0.25
c209	c209.a1	jgi|Tramen1|216868|CE216867_5795|IPR000772|Ricin B lectin domain|IPR000772|Ricin B lectin domain|IPR000772|Ricin B lectin domain|\N|\N|CBM13||	1			0.2		0.2
c210	c210.a1	jgi|Tramen1|1049512|gm1.724_g|IPR014485|Predicted phosphoesterase. C1039.02 type|IPR008334|5'-Nucleotidase. C-terminal|IPR029052|Metallo-dependent phosphatase-like|	1		0.0588235294117647	0.0588235294117647		0.117647058823529
c211	c211.a1	jgi|Tramen1|904425|e_gw1.1.612.1|4.2.1.24|METABOLIC|IPR013126|Heat shock protein 70 family|IPR013126|Heat shock protein 70 family|IPR018181|Heat shock protein 70. conserved site|IPR018181|Heat shock protein 70. conserved site|IPR018181|Heat shock protein 70. conserved site|IPR029047|Heat shock protein 70kD. peptide-binding domain|IPR029048|Heat shock protein 70kD. C-terminal domain|\N|\N|	1		0.0434782608695652	0.0869565217391304		0.0434782608695652
c212	c212.a1	jgi|Tramen1|984637|fgenesh1_kg.13_#_1259_#_TRINITY_DN3985_c0_g4_i1|IPR004046|Glutathione S-transferase. C-terminal|IPR001662|Translation elongation factor EF1B. gamma chain. conserved|IPR004045|Glutathione S-transferase. N-terminal|IPR001662|Translation elongation factor EF1B. gamma chain. conserved|IPR004045|Glutathione S-transferase. N-terminal|IPR010987|Glutathione S-transferase. C-terminal-li…	1		0.125		0.0416666666666667
c213	c213.a1	jgi|Tramen1|999637|fgenesh1_kg.21_#_51_#_TRINITY_DN2935_c0_g3_i1|IPR008030|NmrA-like domain|\N|\N|	1			0.153846153846154		0.153846153846154
c214	c214.a1	jgi|Tramen1|974261|fgenesh1_kg.9_#_2537_#_TRINITY_DN4460_c4_g2_i2|IPR000915|60S ribosomal protein L6E|IPR005568|Ribosomal protein L6. N-terminal|IPR000915|60S ribosomal protein L6E|IPR008991|Translation protein SH3-like domain|	1		0.222222222222222		0.222222222222222
c215	c215.a1	jgi|Tramen1|909372|e_gw1.6.478.1|3.2.1.45|METABOLIC|IPR001139|Glycoside hydrolase. family 30|IPR017853|Glycoside hydrolase superfamily|GH30_3||	1			0.363636363636364
c216	c216.a1	jgi|Tramen1|1057434|gm1.8646_g|3.1.3.2|METABOLIC|IPR029033|Histidine phosphatase superfamily|	1			0.4
c217	c217.a1	jgi|Tramen1|969197|fgenesh1_kg.8_#_688_#_TRINITY_DN4067_c1_g1_i1|IPR023798|Ribosomal protein S7 domain|IPR000235|Ribosomal protein S5/S7|IPR020606|Ribosomal protein S7. conserved site|IPR023798|Ribosomal protein S7 domain|IPR005716|Ribosomal protein S5/S7. eukaryotic/archaeal|	1		0.2		0.1
c218	c218.a1	jgi|Tramen1|910767|e_gw1.7.535.1|IPR010829|Cerato-platanin|IPR009009|RlpA-like double-psi beta-barrel domain|EXPN||	1			0.333333333333333	0.333333333333333	0.333333333333333
c219	c219.a1	jgi|Tramen1|1107075|estExt_Genemark1.C_190114|	1			0.333333333333333		0.166666666666667
c220	c220.a1	jgi|Tramen1|933722|fgenesh1_pg.14_#_160|\N|\N|	1			0.0625		0.125
c221	c221.a1	jgi|Tramen1|934405|fgenesh1_pg.19_#_26|IPR006094|FAD linked oxidase. N-terminal|IPR012951|Berberine/berberine-like|IPR016166|FAD-binding. type 2|IPR016166|FAD-binding. type 2|	1		0.111111111111111	0.111111111111111	0.111111111111111
c222	c222.a1	jgi|Tramen1|924050|e_gw1.35.181.1|1.1.99.1|METABOLIC|IPR000172|Glucose-methanol-choline oxidoreductase. N-terminal|IPR007867|Glucose-methanol-choline oxidoreductase. C-terminal|IPR012132|Glucose-methanol-choline oxidoreductase|IPR000172|Glucose-methanol-choline oxidoreductase. N-terminal|\N|\N|\N|\N|AA3_2||	1		0.153846153846154		0.0769230769230769
c223	c223.a1	jgi|Tramen1|52057|CE52056_3027|3.2.1.78|METABOLIC|IPR001547|Glycoside hydrolase. family 5|IPR017853|Glycoside hydrolase superfamily|GH5_7||	1		0.181818181818182		0.0909090909090909
c224	c224.a1	jgi|Tramen1|926020|e_gw1.44.108.1|	1			1	2
c225	c225.a1	jgi|Tramen1|930863|fgenesh1_pg.3_#_388|IPR002136|Ribosomal protein L4/L1e|IPR025755|60S ribosomal protein L4. C-terminal domain|IPR013000|Ribosomal protein L4/L1e. eukaryotic/archaeal. conserved site|IPR023574|Ribosomal protein L4 domain|	1		0.117647058823529		0.0588235294117647
c226	c226.a1	jgi|Tramen1|1050535|gm1.1747_g|1.1.1.37|METABOLIC|IPR001236|Lactate/malate dehydrogenase. N-terminal|IPR022383|Lactate/malate dehydrogenase. C-terminal|IPR001557|L-lactate/malate dehydrogenase|IPR001252|Malate dehydrogenase. active site|\N|\N|IPR015955|Lactate dehydrogenase/glycoside hydrolase. family 4. C-terminal|IPR010097|Malate dehydrogenase. type 1|	1		0.117647058823529		0.0588235294117647
c227	c227.a1	jgi|Tramen1|923917|e_gw1.35.55.1|3.2.1.4|METABOLIC|IPR005103|Glycoside hydrolase. family 61|AA9||	1		0.25		0.125
c228	c228.a1	jgi|Tramen1|463241|CE463240_16778|2.5.1.18|METABOLIC|IPR004045|Glutathione S-transferase. N-terminal|IPR005442|Glutathione S-transferase. omega-class|IPR004045|Glutathione S-transferase. N-terminal|IPR010987|Glutathione S-transferase. C-terminal-like|IPR010987|Glutathione S-transferase. C-terminal-like|IPR012336|Thioredoxin-like fold|	1				0.0714285714285714	0.142857142857143
c229	c229.a1	jgi|Tramen1|909456|e_gw1.6.848.1|	1		0.272727272727273
c230	c230.a1	jgi|Tramen1|1032914|fgenesh1_kg.51_#_121_#_TRINITY_DN1226_c0_g1_i1|3.2.1.20|METABOLIC|IPR000322|Glycoside hydrolase family 31|IPR030459|Glycosyl hydrolases family 31. conserved site|\N|\N|IPR017853|Glycoside hydrolase superfamily|IPR011013|Galactose mutarotase-like domain|GH31||	1			0.0666666666666667		0.0333333333333333
c231	c231.a1	jgi|Tramen1|995449|fgenesh1_kg.18_#_1471_#_TRINITY_DN4357_c2_g1_i1|4.2.1.11|METABOLIC|IPR020810|Enolase. C-terminal|IPR020811|Enolase. N-terminal|IPR000941|Enolase|IPR000941|Enolase|IPR020809|Enolase. conserved site|IPR029065|Enolase C-terminal domain-like|IPR029017|Enolase N-terminal domain-like|IPR000941|Enolase|	1		0.0625		0.125
c232	c232.a1	jgi|Tramen1|511815|CE511814_359|	1		0.125		0.125	0.125
c233	c233.a1	jgi|Tramen1|910891|e_gw1.7.468.1|1.6.5.5|\N|IPR013149|Alcohol dehydrogenase. C-terminal|IPR013154|Alcohol dehydrogenase GroES-like|IPR020843|Polyketide synthase. enoylreductase domain|IPR011032|GroES (chaperonin 10)-like|\N|\N|	1		0.0833333333333333		0.0833333333333333
c234	c234.a1	jgi|Tramen1|926956|e_gw1.50.83.1|3.1.1.17|METABOLIC|IPR013658|SMP-30/Gluconolactonase/LRE-like region|\N|\N|	1			0.0909090909090909		0.0909090909090909
c235	c235.a1	jgi|Tramen1|905448|e_gw1.2.885.1|3.4.23.34|\N|IPR001461|Aspartic peptidase|IPR001461|Aspartic peptidase|IPR001969|Aspartic peptidase. active site|IPR021109|Aspartic peptidase domain|	1			0.222222222222222
c236	c236.a1	jgi|Tramen1|911959|e_gw1.8.369.1|IPR017853|Glycoside hydrolase superfamily|GH79||	1		0.2
c237	c237.a1	jgi|Tramen1|377270|CE377269_655|3.4.16.6|\N|IPR001563|Peptidase S10. serine carboxypeptidase|IPR001563|Peptidase S10. serine carboxypeptidase|IPR018202|Peptidase S10. serine carboxypeptidase. active site|IPR029058|Alpha/Beta hydrolase fold|	1				0.125
c238	c238.a1	jgi|Tramen1|918107|e_gw1.19.254.1|3.5.1.4|METABOLIC|IPR000120|Amidase|IPR023631|Amidase signature domain|	1			0.0555555555555556		0.0555555555555556
c239	c239.a1	jgi|Tramen1|384936|CE384935_5708|3.4.16.6|\N|IPR001563|Peptidase S10. serine carboxypeptidase|IPR001563|Peptidase S10. serine carboxypeptidase|IPR018202|Peptidase S10. serine carboxypeptidase. active site|IPR029058|Alpha/Beta hydrolase fold|	1			0.111111111111111	0.111111111111111
c240	c240.a1	jgi|Tramen1|271833|CE271832_19613|IPR008397|Alginate lyase domain|IPR008929|Chondroitin AC/alginate lyase|	1				0.2
c241	c241.a1	jgi|Tramen1|1013677|fgenesh1_kg.29_#_1298_#_TRINITY_DN1374_c0_g3_i1|6.3.4.5|METABOLIC|IPR001518|Argininosuccinate synthase|IPR018223|Argininosuccinate synthase. conserved site|IPR018223|Argininosuccinate synthase. conserved site|\N|\N|\N|\N|IPR001518|Argininosuccinate synthase|	1		0.105263157894737
c242	c242.a1	jgi|Tramen1|1148996|estExt_Genewise1.C_5_t20143|IPR006114|6-phosphogluconate dehydrogenase. C-terminal|IPR006115|6-phosphogluconate dehydrogenase. NADP-binding|IPR006113|6-phosphogluconate dehydrogenase. decarboxylating|\N|\N|IPR006184|6-phosphogluconate-binding site|IPR008927|6-phosphogluconate dehydrogenase. C-terminal-like|\N|\N|IPR006113|6-phosphogluconate dehydrogenase. decarboxylating|	1		0.0555555555555556	0.0555555555555556
c243	c243.a1	jgi|Tramen1|945663|fgenesh1_kg.2_#_1988_#_TRINITY_DN398_c0_g1_i2|3.4.16.6|\N|IPR001563|Peptidase S10. serine carboxypeptidase|IPR001563|Peptidase S10. serine carboxypeptidase|IPR018202|Peptidase S10. serine carboxypeptidase. active site|IPR029058|Alpha/Beta hydrolase fold|	1			0.0909090909090909
c244	c244.a1	jgi|Tramen1|1054481|gm1.5693_g|	1		0.25		0.25

## Sheet: Compare spectra Tre1104 Q-Exa
Proteomics complementary data for Tre1104. Number of identified spectra in each condition (Maltose + Lignin and Lignin) at days 7 and 14 following the Q-Exactive analysis methods.
Group ID	Sub-group ID	Protein Description	Number of proteins	Day3_Maltose+Lignin	Day3_Lignin	Day7_Maltose+Lignin	Day7_Lignin	Day14_Maltose+Lignin	Day14_Lignin
a1	a1.a1	jgi|Trire2|1885|fgenesh1_pm.C_scaffold_1000219|GH15-CBM20|Glycoside Hydrolase Family 15 / Carbohydrate-Binding Module Family 20 protein|3.2.1.3|Glucan 1,4-alpha-glucosidase.|	1	73	34	447	95	131	34
a2	a2.a1	jgi|Trire2|70840|e_gw1.42.18.1|	1	25	11	228	202	25	44	*
a3	a3.a1	jgi|Trire2|121746|estExt_fgenesh5_pg.C_90034|GH55|Glycoside Hydrolase Family 55 protein|	1	20	3	357	44	47	16
a4	a4.a1	jgi|Trire2|80833|estExt_GeneWisePlus.C_210026|GH18|Glycoside Hydrolase Family 18 protein|3.2.1.14|Chitinase.|	1	5	5	73	137	13	63	*
a5	a5.a1	jgi|Trire2|55319|e_gw1.2.255.1|GH54-CBM42|Glycoside Hydrolase Family 54 / Carbohydrate-Binding Module Family 42 protein|	1	3	6	72	40	9	13
a5	a5.a2	jgi|Trire2|123283|estExt_fgenesh5_pg.C_190214|GH54-CBM42|Glycoside Hydrolase Family 54 / Carbohydrate-Binding Module Family 42 protein|	1	1	5	29	46	9	21	*
a6	a6.a1	jgi|Trire2|49081|estExt_Genewise1.C_120020|GH74-CBM1|Glycoside Hydrolase Family 74 / Carbohydrate-Binding Module Family 1 protein|	1	1	2	49	114	5	10
a7	a7.a1	jgi|Trire2|65406|e_gw1.16.441.1|GH16|Glycoside Hydrolase Family 16 protein|	1	5	4	71	62	11	21	*
a8	a8.a1	jgi|Trire2|54242|e_gw1.1.1341.1|GH55|Glycoside Hydrolase Family 55 protein|	1	6	8	74	53	10	10
a9	a9.a1	jgi|Trire2|120873|estExt_fgenesh5_pg.C_50016|GH71-CBM24-CBM24|Glycoside Hydrolase Family 71 / Carbohydrate-Binding Module Family 24 protein|3.2.1.59|Glucan endo-1,3-alpha-glucosidase.|	1	1	2	66	51	3	16	*
b10	b10.a1	jgi|Trire2|72526|kg2.C_scaffold_28000022|GH67|Glycoside Hydrolase Family 67 protein|	1	0	16	38	57	7	18	*
b11	b11.a1	jgi|Trire2|123989|estExt_fgenesh5_pg.C_290113|GH7-CBM1|Glycoside Hydrolase Family 7 / Carbohydrate-Binding Module Family 1 protein|	1	1	3	32	76	5	18	*
b12	b12.a1	jgi|Trire2|124016|estExt_fgenesh5_pg.C_300077|GH36|Glycoside Hydrolase Family 36 protein|3.2.1.22|Alpha-galactosidase.|3.2.1.22|Alpha-galactosidase.|3.2.1.22|Alpha-galactosidase.|3.2.1.22|Alpha-galactosidase.|	1	0	5	26	43	11	33	*
b13	b13.a1	jgi|Trire2|121127|estExt_fgenesh5_pg.C_60038|GH3|Glycoside Hydrolase Family 3 protein|3.2.1.21|Beta-glucosidase.|3.2.1.21|Beta-glucosidase.|3.2.1.21|Beta-glucosidase.|	1	2	13	45	40	3	13	*
b14	b14.a1	jgi|Trire2|21725|estExt_fgenesh1_pm.C_40061|GH20|Glycoside Hydrolase Family 20 protein|3.2.1.52|Beta-N-acetylhexosaminidase.|3.2.1.52|Beta-N-acetylhexosaminidase.|3.2.1.52|Beta-N-acetylhexosaminidase.|3.2.1.52|Beta-N-acetylhexosaminidase.|3.2.1.52|Beta-N-acetylhexosaminidase.|	1	3	1	42	30	9	17	*
b15	b15.a1	jgi|Trire2|69863|e_gw1.31.20.1|6.3.5.-|Carbon--nitrogen ligases with glutamine as amido-N-donor.|6.3.5.-|Carbon--nitrogen ligases with glutamine as amido-N-donor.|	1	1	14	31	45	2	6	*
b16	b16.a1	jgi|Trire2|124175|estExt_fgenesh5_pg.C_370018|GH64|Glycoside Hydrolase Family 64 protein|	1	1	2	44	26	12	9
b17	b17.a1	jgi|Trire2|39942|gw1.11.503.1|GH17|Glycoside Hydrolase Family 17 protein|3.2.1.58|Glucan 1,3-beta-glucosidase.|	1	4	3	42	29	4	8
b18	b18.a1	jgi|Trire2|124282|estExt_fgenesh5_pg.C_480011|AA5_1|Copper radical oxidase|	1	1	2	38	32	7	8
b19	b19.a1	jgi|Trire2|82235|estExt_GeneWisePlus.C_330081|GH31|Glycoside Hydrolase Family 31 protein|3.2.1.20|Alpha-glucosidase.|3.2.1.20|Alpha-glucosidase.|	1	4	1	49	15	5	7
b20	b20.a1	jgi|Trire2|105956|fgenesh5_pg.C_scaffold_6000182|GH13_1|Glycoside Hydrolase Family 13 protein|3.2.1.1|Alpha-amylase.|	1	2	2	68	5	1	3
b21	b21.a1	jgi|Trire2|69245|e_gw1.28.19.1|GH2|Glycoside Hydrolase Family 2 protein|3.2.1.25|Beta-mannosidase.|	1	5	2	37	15	10	11
b22	b22.a1	jgi|Trire2|123726|estExt_fgenesh5_pg.C_250133|GH16|Glycoside Hydrolase Family 16 protein|	1	1	2	39	23	6	9
b23	b23.a1	jgi|Trire2|55733|e_gw1.2.121.1|GH92|Glycoside Hydrolase Family 92 protein|	1	1	1	37	17	9	12
b24	b24.a1	jgi|Trire2|71532|kg2.C_scaffold_10000059|GH71|Glycoside Hydrolase Family 71 protein|3.2.1.59|Glucan endo-1,3-alpha-glucosidase.|	1	1	3	30	27	2	7	*
b25	b25.a1	jgi|Trire2|77579|estExt_GeneWisePlus.C_80475|3.4.23.25|Saccharopepsin.|	1	0	3	30	21	7	8
b26	b26.a1	jgi|Trire2|70845|e_gw1.42.21.1|GH55|Glycoside Hydrolase Family 55 protein|	1	3	6	26	21	4	7	*
b27	b27.a1	jgi|Trire2|22914|estExt_fgenesh1_pm.C_180019|GH72-CBM43|Glycoside Hydrolase Family 72 / Carbohydrate-Binding Module Family 43 protein|	1	1	3	27	25	5	6	*
b28	b28.a1	jgi|Trire2|82662|estExt_GeneWisePlus.C_540005|EXPN|Distantly related to plant expansins|	1	3	4	20	16	9	14	*
b29	b29.a1	jgi|Trire2|121735|estExt_fgenesh5_pg.C_90015|GH3|Glycoside Hydrolase Family 3 protein|3.2.1.21|Beta-glucosidase.|3.2.1.21|Beta-glucosidase.|3.2.1.21|Beta-glucosidase.|	1	5	3	30	12	10	3
b30	b30.a1	jgi|Trire2|123456|estExt_fgenesh5_pg.C_220028|GH65-CBM32|Glycoside Hydrolase Family 65 / Carbohydrate-Binding Module Family 32 protein|3.2.1.28|Alpha,alpha-trehalase.|	1	3	4	32	12	5	6
b31	b31.a1	jgi|Trire2|123818|estExt_fgenesh5_pg.C_270048|GH11|Glycoside Hydrolase Family 11 protein|	1	0	3	11	40	1	5	*
b32	b32.a1	jgi|Trire2|71170|e_gw1.69.4.1|	1	0	0	36	15	4	4
b33	b33.a1	jgi|Trire2|74282|estExt_GeneWisePlus.C_11554|3.4.21.-|Serine endopeptidases.|	1	1	0	16	10	19	11
b34	b34.a1	jgi|Trire2|74156|estExt_GeneWisePlus.C_11223|3.4.23.18|Aspergillopepsin I.|	1	1	4	14	25	4	9	*
b35	b35.a1	jgi|Trire2|82633|estExt_GeneWisePlus.C_460047|GH72-CBM43|Glycoside Hydrolase Family 72 / Carbohydrate-Binding Module Family 43 protein|	1	1	3	33	10	7	3
b36	b36.a1	jgi|Trire2|80240|estExt_GeneWisePlus.C_170350|GH35|Glycoside Hydrolase Family 35 protein|3.2.1.23|Beta-galactosidase.|3.2.1.23|Beta-galactosidase.|3.2.1.23|Beta-galactosidase.|3.2.1.23|Beta-galactosidase.|3.2.1.23|Beta-galactosidase.|	1	1	2	21	22	1	10	*
b37	b37.a1	jgi|Trire2|110894|fgenesh5_pg.C_scaffold_23000032|GH30_5|Glycoside Hydrolase Family 30 protein|	1	0	3	15	28	3	6	*
b38	b38.a1	jgi|Trire2|111849|fgenesh5_pg.C_scaffold_29000119|GH30_7|Glycoside Hydrolase Family 30 protein|3.2.1.45|Glucosylceramidase.|	1	1	7	16	20	3	6	*
b39	b39.a1	jgi|Trire2|123226|estExt_fgenesh5_pg.C_190074|GH37|Glycoside Hydrolase Family 37 protein|	1	2	2	15	17	5	7
b40	b40.a1	jgi|Trire2|104797|fgenesh5_pg.C_scaffold_4000175|GH3|Glycoside Hydrolase Family 3 protein|3.2.1.21|Beta-glucosidase.|3.2.1.21|Beta-glucosidase.|3.2.1.21|Beta-glucosidase.|	1	0	0	21	11	6	7
b41	b41.a1	jgi|Trire2|64397|e_gw1.14.346.1|	1	1	1	20	11	5	5
b42	b42.a1	jgi|Trire2|104461|fgenesh5_pg.C_scaffold_3000416|	1	2	3	24	9	2	3
b43	b43.a1	jgi|Trire2|58450|e_gw1.5.72.1|GH3|Glycoside Hydrolase Family 3 protein|3.2.1.21|Beta-glucosidase.|3.2.1.21|Beta-glucosidase.|3.2.1.21|Beta-glucosidase.|	1	1	2	12	12	7	7
b44	b44.a1	jgi|Trire2|75159|estExt_GeneWisePlus.C_30106|	1	0	0	11	21	0	7	*
b45	b45.a1	jgi|Trire2|76210|estExt_GeneWisePlus.C_50020|GH62|Glycoside Hydrolase Family 62 protein|	1	0	0	13	23	0	3	*
b46	b46.a1	jgi|Trire2|60635|e_gw1.8.68.1|GH92|Glycoside Hydrolase Family 92 protein|	1	1	1	15	11	5	5
b47	b47.a1	jgi|Trire2|44214|estExt_Genewise1.C_11181|CE5|Carbohydrate Esterase Family 5 protein|	1	2	2	19	8	4	3
b48	b48.a1	jgi|Trire2|58282|e_gw1.5.46.1|	1	0	0	9	18	0	8	*
b49	b49.a1	jgi|Trire2|73631|estExt_GeneWisePlus.C_10262|	1	0	2	9	21	0	3	*
b50	b50.a1	jgi|Trire2|121418|estExt_fgenesh5_pg.C_70291|CE16|Carbohydrate Esterase Family 16 protein|	1	1	3	12	12	1	5	*
b51	b51.a1	jgi|Trire2|122780|estExt_fgenesh5_pg.C_150014|GH28|Glycoside Hydrolase Family 28 protein|	1	0	0	11	11	3	8	*
b52	b52.a1	jgi|Trire2|72632|kg2.C_scaffold_3000067|GH27|Glycoside Hydrolase Family 27 protein|3.2.1.22|Alpha-galactosidase.|3.2.1.22|Alpha-galactosidase.|3.2.1.22|Alpha-galactosidase.|3.2.1.22|Alpha-galactosidase.|	1	0	3	13	13	1	3
b53	b53.a1	jgi|Trire2|57098|e_gw1.3.616.1|GH92|Glycoside Hydrolase Family 92 protein|	1	0	1	15	11	2	4
b54	b54.a1	jgi|Trire2|73523|estExt_GeneWisePlus.C_10057|	1	1	4	13	9	2	3
b55	b55.a1	jgi|Trire2|81070|estExt_GeneWisePlus.C_220116|3.4.11.-|Aminopeptidases.|	1	0	3	8	12	3	6	*
b56	b56.a1	jgi|Trire2|77299|estExt_GeneWisePlus.C_70730|GH2|Glycoside Hydrolase Family 2 protein|3.2.1.25|Beta-mannosidase.|	1	0	2	5	16	1	8	*
b57	b57.a1	jgi|Trire2|76672|estExt_GeneWisePlus.C_60045|GH3|Glycoside Hydrolase Family 3 protein|3.2.1.21|Beta-glucosidase.|3.2.1.21|Beta-glucosidase.|3.2.1.21|Beta-glucosidase.|	1	0	0	6	20	0	6	*
b58	b58.a1	jgi|Trire2|45445|estExt_Genewise1.C_30504|	1	2	1	14	8	3	2
b59	b59.a1	jgi|Trire2|79606|estExt_GeneWisePlus.C_140316|GH115|Glycoside Hydrolase Family 115 protein|	1	0	0	8	9	4	8	*
b60	b60.a1	jgi|Trire2|73248|kg2.C_scaffold_7000057|GH55|Glycoside Hydrolase Family 55 protein|	1	0	3	10	11	1	4
b61	b61.a1	jgi|Trire2|121475|estExt_fgenesh5_pg.C_70445|	1	0	0	13	12	1	3
b62	b62.a1	jgi|Trire2|123992|estExt_fgenesh5_pg.C_290118|CBM1-EXPN|Carbohydrate-Binding Module Family 1 / Distantly related to plant expansins|	1	0	2	12	11	1	3
b63	b63.a1	jgi|Trire2|58802|e_gw1.5.84.1|GH95|Glycoside Hydrolase Family 95 protein|	1	0	4	5	16	0	3	*
b64	b64.a1	jgi|Trire2|124051|estExt_fgenesh5_pg.C_320018|3.4.-.-|Acting on peptide bonds (peptide hydrolases).|3.4.-.-|Acting on peptide bonds (peptide hydrolases).|	1	0	2	7	11	3	3	*
b65	b65.a1	jgi|Trire2|78828|estExt_GeneWisePlus.C_110504|3.1.1.1|Carboxylesterase.|	1	0	3	8	10	1	4
b66	b66.a1	jgi|Trire2|122127|estExt_fgenesh5_pg.C_100337|	1	2	1	9	6	3	3
b67	b67.a1	jgi|Trire2|58563|e_gw1.5.211.1|	1	1	0	18	1	4	0
b68	b68.a1	jgi|Trire2|3094|fgenesh1_pm.C_scaffold_5000055|GH30_3|Glycoside Hydrolase Family 30 protein|	1	1	0	12	6	3	1
b69	b69.a1	jgi|Trire2|119805|estExt_fgenesh5_pg.C_10576|	1	0	1	10	8	0	3
b70	b70.a1	jgi|Trire2|120784|estExt_fgenesh5_pg.C_40418|5.1.3.3|Aldose 1-epimerase.|	1	0	0	9	6	3	3
b71	b71.a1	jgi|Trire2|66792|e_gw1.19.77.1|GH17|Glycoside Hydrolase Family 17 protein|3.2.1.58|Glucan 1,3-beta-glucosidase.|	1	0	1	7	11	1	1
b72	b72.a1	jgi|Trire2|123039|estExt_fgenesh5_pg.C_170159|	1	1	1	10	6	1	2
b73	b73.a1	jgi|Trire2|110171|fgenesh5_pg.C_scaffold_19000056|3.3.1.1|Adenosylhomocysteinase.|3.3.1.1|Adenosylhomocysteinase.|	1	0	0	2	12	0	6
b74	b74.a1	jgi|Trire2|119735|estExt_fgenesh5_pg.C_10410|1.2.1.12|Glyceraldehyde 3-phosphate dehydrogenase (phosphorylating).|1.2.1.12|Glyceraldehyde 3-phosphate dehydrogenase (phosphorylating).|	1	0	0	7	9	2	2
b75	b75.a1	jgi|Trire2|72567|kg2.C_scaffold_3000002|CBM1-GH6|Carbohydrate-Binding Module Family 1 / Glycoside Hydrolase Family 6 protein|	1	0	0	7	9	0	4
b76	b76.a1	jgi|Trire2|111694|fgenesh5_pg.C_scaffold_28000107|3.4.13.19|Membrane dipeptidase.|	1	0	1	10	7	1	1
b77	b77.a1	jgi|Trire2|105860|fgenesh5_pg.C_scaffold_6000086|	1	0	0	9	6	2	2
b78	b78.a1	jgi|Trire2|66616|e_gw1.19.24.1|3.1.3.2|Acid phosphatase.|3.1.3.2|Acid phosphatase.|	1	0	0	11	5	1	2
b79	b79.a1	jgi|Trire2|74223|estExt_GeneWisePlus.C_11372|GH11|Glycoside Hydrolase Family 11 protein|	1	0	0	10	7	0	1
b80	b80.a1	jgi|Trire2|79807|estExt_GeneWisePlus.C_150299|3.4.23.3|Gastricsin.|	1	0	2	8	4	1	2
b81	b81.a1	jgi|Trire2|73638|estExt_GeneWisePlus.C_10269|CBM1|Carbohydrate-Binding Module Family 1 protein|	1	0	1	4	8	1	3
b82	b82.a1	jgi|Trire2|119989|estExt_fgenesh5_pg.C_20004|	1	0	0	6	8	1	2
b83	b83.a1	jgi|Trire2|59665|e_gw1.6.57.1|	1	0	1	8	5	1	1
b84	b84.a1	jgi|Trire2|59508|e_gw1.6.152.1|3.1.1.7|Acetylcholinesterase.|	1	0	1	7	7	0	1
b85	b85.a1	jgi|Trire2|122081|estExt_fgenesh5_pg.C_100226|GH7-CBM1|Glycoside Hydrolase Family 7 / Carbohydrate-Binding Module Family 1 protein|	1	0	0	5	5	2	3
b86	b86.a1	jgi|Trire2|121989|estExt_fgenesh5_pg.C_100051|	1	0	0	5	6	0	4
b87	b87.a1	jgi|Trire2|81517|estExt_GeneWisePlus.C_250157|	1	0	0	9	4	1	1
b88	b88.a1	jgi|Trire2|102908|fgenesh5_pg.C_scaffold_1000541|	1	0	0	8	4	1	1
b89	b89.a1	jgi|Trire2|31248|gw1.2.425.1|3.1.27.1|Ribonuclease T2.|	1	1	1	3	6	1	2
b90	b90.a1	jgi|Trire2|123026|estExt_fgenesh5_pg.C_170136|	1	0	0	6	6	0	2
b91	b91.a1	jgi|Trire2|65156|e_gw1.15.351.1|	1	0	1	3	6	2	2
b92	b92.a1	jgi|Trire2|54694|e_gw1.1.623.1|1.1.1.-|With NAD(+) or NADP(+) as acceptor.|1.1.1.-|With NAD(+) or NADP(+) as acceptor.|1.1.1.-|With NAD(+) or NADP(+) as acceptor.|1.1.1.-|With NAD(+) or NADP(+) as acceptor.|1.1.1.-|With NAD(+) or NADP(+) as acceptor.|1.1.1.-|With NAD(+) or NADP(+) as acceptor.|1.1.1.-|With NAD(+) or NADP(+) as acceptor.|1.1.1.-|With NAD(+) or NADP(+) as acceptor.|1.1.1.-|With NAD…	1	0	3	2	4	2	2
b93	b93.a1	jgi|Trire2|64193|e_gw1.13.303.1|3.4.17.21|Glutamate carboxypeptidase II.|	1	0	0	6	5	0	2
b94	b94.a1	jgi|Trire2|106575|fgenesh5_pg.C_scaffold_7000376|GH79|Glycoside Hydrolase Family 79 protein|	1	0	1	7	2	1	2
b95	b95.a1	jgi|Trire2|51365|estExt_Genewise1.C_220234|	1	0	1	4	4	1	3
b96	b96.a1	jgi|Trire2|45717|estExt_Genewise1.C_31037|GH47|Glycoside Hydrolase Family 47 protein|3.2.1.113|Mannosyl-oligosaccharide 1,2-alpha-mannosidase.|	1	0	0	8	5	0	0
b97	b97.a1	jgi|Trire2|102837|fgenesh5_pg.C_scaffold_1000470|	1	2	1	3	4	1	1
b98	b98.a1	jgi|Trire2|58333|e_gw1.5.640.1|	1	0	0	6	4	1	1
b99	b99.a1	jgi|Trire2|70803|e_gw1.41.6.1|1.11.1.11|L-ascorbate peroxidase.|	1	0	0	3	7	0	2
c100	c100.a1	jgi|Trire2|104401|fgenesh5_pg.C_scaffold_3000356|3.2.1.14|Chitinase.|	1	0	0	8	4	0	0
c101	c101.a1	jgi|Trire2|107850|fgenesh5_pg.C_scaffold_10000240|CE1|Carbohydrate Esterase Family 1 protein|	1	0	1	3	4	1	2
c102	c102.a1	jgi|Trire2|71394|kg2.C_scaffold_1000179|GH79|Glycoside Hydrolase Family 79 protein|	1	0	1	4	4	1	1
c103	c103.a1	jgi|Trire2|104277|fgenesh5_pg.C_scaffold_3000232|	1	0	1	3	5	0	2
c104	c104.a1	jgi|Trire2|62213|e_gw1.10.542.1|	1	0	0	5	5	0	1
c105	c105.a1	jgi|Trire2|65483|e_gw1.16.447.1|	1	0	0	3	6	0	2
c106	c106.a1	jgi|Trire2|82623|estExt_GeneWisePlus.C_450028|3.4.14.9|Tripeptidyl-peptidase I.|	1	0	2	3	4	0	2
c107	c107.a1	jgi|Trire2|76971|estExt_GeneWisePlus.C_70055|	1	0	0	11	0	0	0
c108	c108.a1	jgi|Trire2|22915|estExt_fgenesh1_pm.C_180020|AA3_2|GMC oxidoreductase|	1	0	0	7	3	0	1
c109	c109.a1	jgi|Trire2|79921|estExt_GeneWisePlus.C_160157|GH92|Glycoside Hydrolase Family 92 protein|	1	0	0	1	8	0	1
c110	c110.a1	jgi|Trire2|103458|fgenesh5_pg.C_scaffold_2000046|GH25|Glycoside Hydrolase Family 25 protein|	1	0	1	3	4	1	1
c111	c111.a1	jgi|Trire2|110848|fgenesh5_pg.C_scaffold_22000161|	1	0	1	2	5	0	2
c112	c112.a1	jgi|Trire2|59391|e_gw1.6.87.1|GH27|Glycoside Hydrolase Family 27 protein|	1	0	1	3	4	0	2
c113	c113.a1	jgi|Trire2|107881|fgenesh5_pg.C_scaffold_10000271|	1	0	0	5	3	1	1
c114	c114.a1	jgi|Trire2|81778|estExt_GeneWisePlus.C_270210|	1	0	0	5	3	0	2
c115	c115.a1	jgi|Trire2|50390|estExt_Genewise1.C_170177|	1	0	1	5	4	0	0
c116	c116.a1	jgi|Trire2|68067|e_gw1.23.74.1|	1	0	0	5	5	0	0
c117	c117.a1	jgi|Trire2|122374|estExt_fgenesh5_pg.C_120035|	1	0	0	4	4	0	2
c118	c118.a1	jgi|Trire2|47268|estExt_Genewise1.C_70352|GH3|Glycoside Hydrolase Family 3 protein|3.2.1.21|Beta-glucosidase.|3.2.1.21|Beta-glucosidase.|3.2.1.21|Beta-glucosidase.|	1	0	0	6	4	0	0
c119	c119.a1	jgi|Trire2|21960|estExt_fgenesh1_pm.C_50195|	1	0	0	7	3	0	0
c120	c120.a1	jgi|Trire2|103049|fgenesh5_pg.C_scaffold_1000682|GH28|Glycoside Hydrolase Family 28 protein|3.2.1.15|Polygalacturonase.|3.2.1.15|Polygalacturonase.|	1	0	0	4	4	1	0
c121	c121.a1	jgi|Trire2|5776|fgenesh1_pm.C_scaffold_29000020|5.3.1.9|Glucose-6-phosphate isomerase.|5.3.1.9|Glucose-6-phosphate isomerase.|5.3.1.9|Glucose-6-phosphate isomerase.|	1	0	0	5	3	0	1
c122	c122.a1	jgi|Trire2|69276|e_gw1.28.211.1|GH30_7|Glycoside Hydrolase Family 30 protein|3.2.1.45|Glucosylceramidase.|	1	0	0	2	6	0	1
c123	c123.a1	jgi|Trire2|112018|fgenesh5_pg.C_scaffold_31000056|	1	0	0	6	1	1	1
c124	c124.a1	jgi|Trire2|73643|estExt_GeneWisePlus.C_10274|AA9-CBM1|Lytic polysaccharide monooxygenase (formerly GH61) / Carbohydrate-Binding Module Family 1 protein|	1	0	1	1	4	1	2
c125	c125.a1	jgi|Trire2|111818|fgenesh5_pg.C_scaffold_29000088|3.4.23.24|Candidapepsin.|	1	0	0	2	7	0	0
c126	c126.a1	jgi|Trire2|78357|estExt_GeneWisePlus.C_100319|AA6|Benzoquinone reductase|	1	0	0	6	2	0	1
c127	c127.a1	jgi|Trire2|108672|fgenesh5_pg.C_scaffold_13000018|GH71-CBM24-CBM24|Glycoside Hydrolase Family 71 / Carbohydrate-Binding Module Family 24 protein|3.2.1.59|Glucan endo-1,3-alpha-glucosidase.|	1	0	0	5	4	0	0
c128	c128.a1	jgi|Trire2|111495|fgenesh5_pg.C_scaffold_27000066|	1	0	1	2	4	0	1
c129	c129.a1	jgi|Trire2|56830|e_gw1.3.133.1|3.1.1.1|Carboxylesterase.|	1	0	0	3	3	1	1
c130	c130.a1	jgi|Trire2|123029|estExt_fgenesh5_pg.C_170139|	1	0	1	4	3	0	0
c131	c131.a1	jgi|Trire2|60784|e_gw1.8.587.1|	1	0	1	3	2	1	1
c132	c132.a1	jgi|Trire2|69489|e_gw1.29.29.1|3.4.16.5|Carboxypeptidase C.|	1	0	0	2	2	2	2
c133	c133.a1	jgi|Trire2|73604|estExt_GeneWisePlus.C_10225|3.1.3.2|Acid phosphatase.|3.1.3.2|Acid phosphatase.|	1	0	0	3	3	1	1
c134	c134.a1	jgi|Trire2|122233|estExt_fgenesh5_pg.C_110101|1.1.1.85|3-isopropylmalate dehydrogenase.|	1	0	0	4	1	1	2
c135	c135.a1	jgi|Trire2|76155|estExt_GeneWisePlus.C_40925|	1	0	0	4	4	0	0
c136	c136.a1	jgi|Trire2|73256|kg2.C_scaffold_7000065|GH81|Glycoside Hydrolase Family 81 protein|	1	0	0	7	1	0	0
c137	c137.a1	jgi|Trire2|23346|estExt_fgenesh1_pm.C_290025|GH20|Glycoside Hydrolase Family 20 protein|3.2.1.52|Beta-N-acetylhexosaminidase.|3.2.1.52|Beta-N-acetylhexosaminidase.|3.2.1.52|Beta-N-acetylhexosaminidase.|3.2.1.52|Beta-N-acetylhexosaminidase.|3.2.1.52|Beta-N-acetylhexosaminidase.|	1	0	0	3	4	0	1
c138	c138.a1	jgi|Trire2|122487|estExt_fgenesh5_pg.C_120255|	1	0	0	6	2	0	0
c139	c139.a1	jgi|Trire2|120312|estExt_fgenesh5_pg.C_30013|CBM1-GH5_5|Carbohydrate-Binding Module Family 1 / Glycoside Hydrolase Family 5 protein|	1	0	0	5	3	0	0
c140	c140.a1	jgi|Trire2|63416|e_gw1.12.549.1|	1	1	0	3	1	1	1
c141	c141.a1	jgi|Trire2|56996|e_gw1.3.372.1|GH5_7|Glycoside Hydrolase Family 5 protein|	1	0	0	2	4	0	1
c142	c142.a1	jgi|Trire2|71092|e_gw1.53.15.1|3.1.3.2|Acid phosphatase.|3.1.3.2|Acid phosphatase.|	1	0	0	3	2	1	1
c143	c143.a1	jgi|Trire2|70373|e_gw1.35.52.1|GH125|Glycoside Hydrolase Family 125 protein|	1	0	0	2	4	1	0
c144	c144.a1	jgi|Trire2|80980|estExt_GeneWisePlus.C_210298|	1	0	0	2	2	0	3
c145	c145.a1	jgi|Trire2|120568|estExt_fgenesh5_pg.C_40047|4.2.1.11|Phosphopyruvate hydratase.|4.2.1.11|Phosphopyruvate hydratase.|	1	0	0	2	4	0	1
c146	c146.a1	jgi|Trire2|4213|fgenesh1_pm.C_scaffold_11000030|3.1.27.1|Ribonuclease T2.|	1	0	0	4	1	0	2
c147	c147.a1	jgi|Trire2|105275|fgenesh5_pg.C_scaffold_5000060|	1	1	0	4	0	1	1
c148	c148.a1	jgi|Trire2|47127|estExt_Genewise1.C_70057|3.4.11.22|Aminopeptidase I|	1	0	0	2	4	0	1
c149	c149.a1	jgi|Trire2|69736|e_gw1.30.36.1|GH30_3|Glycoside Hydrolase Family 30 protein|3.2.1.45|Glucosylceramidase.|	1	0	0	2	4	0	1
c150	c150.a1	jgi|Trire2|121133|estExt_fgenesh5_pg.C_60052|3.4.23.18|Aspergillopepsin I.|	1	0	0	4	3	0	0
c151	c151.a1	jgi|Trire2|119568|estExt_fgenesh5_pg.C_10101|	1	0	0	4	3	0	0
c152	c152.a1	jgi|Trire2|49274|estExt_Genewise1.C_120332|GH16|Glycoside Hydrolase Family 16 protein|	1	0	0	3	3	0	1
c153	c153.a1	jgi|Trire2|120821|estExt_fgenesh5_pg.C_40485|	1	0	0	4	3	0	0
c154	c154.a1	jgi|Trire2|102735|fgenesh5_pg.C_scaffold_1000368|	1	0	1	1	3	0	1
c155	c155.a1	jgi|Trire2|79448|estExt_GeneWisePlus.C_140046|	1	0	0	1	5	0	0
c156	c156.a1	jgi|Trire2|3196|fgenesh1_pm.C_scaffold_5000157|GH38|Glycoside Hydrolase Family 38 protein|3.2.1.24|Alpha-mannosidase.|	1	0	0	2	1	1	2
c157	c157.a1	jgi|Trire2|122076|estExt_fgenesh5_pg.C_100212|3.4.23.24|Candidapepsin.|	1	0	0	3	2	0	1
c158	c158.a1	jgi|Trire2|121298|estExt_fgenesh5_pg.C_70028|1.2.1.2|Formate dehydrogenase.|1.2.1.2|Formate dehydrogenase.|	1	0	0	1	4	0	1
c159	c159.a1	jgi|Trire2|120635|estExt_fgenesh5_pg.C_40157|2.2.1.1|Transketolase.|2.2.1.1|Transketolase.|	1	0	0	0	5	0	1
c160	c160.a1	jgi|Trire2|73632|estExt_GeneWisePlus.C_10263|CE5-CBM1|Carbohydrate Esterase Family 5 / Carbohydrate-Binding Module Family 1 protein|	1	0	2	1	2	0	1
c161	c161.a1	jgi|Trire2|123244|estExt_fgenesh5_pg.C_190118|	1	0	0	3	2	0	1
c162	c162.a1	jgi|Trire2|123967|estExt_fgenesh5_pg.C_290049|	1	0	1	2	1	1	1
c163	c163.a1	jgi|Trire2|122794|estExt_fgenesh5_pg.C_150066|	1	1	1	3	1	0	0
c164	c164.a1	jgi|Trire2|22129|estExt_fgenesh1_pm.C_70158|AA11|Lytic polysaccharide monooxygenase|	1	0	0	4	1	1	0
c165	c165.a1	jgi|Trire2|122529|estExt_fgenesh5_pg.C_130079|3.1.-.-|Acting on ester bonds.|	1	0	0	2	3	0	1
c166	c166.a1	jgi|Trire2|80920|estExt_GeneWisePlus.C_210182|1.1.1.1|Alcohol dehydrogenase.|1.1.1.1|Alcohol dehydrogenase.|1.1.1.1|Alcohol dehydrogenase.|1.1.1.1|Alcohol dehydrogenase.|1.1.1.1|Alcohol dehydrogenase.|	1	0	0	3	2	0	1
c167	c167.a1	jgi|Trire2|5836|fgenesh1_pm.C_scaffold_30000038|GH2|Glycoside Hydrolase Family 2 protein|3.2.1.25|Beta-mannosidase.|	1	0	0	5	1	0	0
c168	c168.a1	jgi|Trire2|119859|estExt_fgenesh5_pg.C_10726|GH18|Glycoside Hydrolase Family 18 protein|3.2.1.14|Chitinase.|	1	0	0	3	3	0	0
c169	c169.a1	jgi|Trire2|68347|e_gw1.24.244.1|GH18-CBM1|Glycoside Hydrolase Family 18 / Carbohydrate-Binding Module Family 1 protein|3.2.1.14|Chitinase.|	1	0	0	3	2	0	0
c169	c169.a2	jgi|Trire2|110317|fgenesh5_pg.C_scaffold_19000202|GH18-CBM1|Glycoside Hydrolase Family 18 / Carbohydrate-Binding Module Family 1 protein|3.2.1.14|Chitinase.|	1	0	0	2	1	0	0
c170	c170.a1	jgi|Trire2|69555|e_gw1.29.235.1|	1	0	0	6	0	0	0
c171	c171.a1	jgi|Trire2|76238|estExt_GeneWisePlus.C_50107|3.6.3.6|Proton-exporting ATPase.|	1	0	0	2	1	0	2
c172	c172.a1	jgi|Trire2|53947|e_gw1.1.1053.1|	1	0	0	2	3	0	0
c173	c173.a1	jgi|Trire2|103033|fgenesh5_pg.C_scaffold_1000666|PL7_4|Polysaccharide Lyase Family 7 protein|	1	0	0	3	2	0	0
c174	c174.a1	jgi|Trire2|56920|e_gw1.3.290.1|3.4.11.10|Bacterial leucyl aminopeptidase.|	1	0	0	3	1	0	1
c175	c175.a1	jgi|Trire2|111138|fgenesh5_pg.C_scaffold_24000126|GH95|Glycoside Hydrolase Family 95 protein|	1	0	0	1	2	1	1
c176	c176.a1	jgi|Trire2|105808|fgenesh5_pg.C_scaffold_6000034|	1	0	0	1	2	0	2
c177	c177.a1	jgi|Trire2|39755|gw1.9.544.1|GH16|Glycoside Hydrolase Family 16 protein|	1	0	0	2	2	0	1
c178	c178.a1	jgi|Trire2|123232|estExt_fgenesh5_pg.C_190084|GH12|Glycoside Hydrolase Family 12 protein|	1	0	0	1	4	0	0
c179	c179.a1	jgi|Trire2|58525|e_gw1.5.237.1|	1	0	1	0	4	0	0
c180	c180.a1	jgi|Trire2|124256|estExt_fgenesh5_pg.C_420016|3.1.1.5|Lysophospholipase.|	1	0	1	2	2	0	0
c181	c181.a1	jgi|Trire2|74807|estExt_GeneWisePlus.C_20485|GH76|Glycoside Hydrolase Family 76 protein|	1	0	0	1	3	0	1
c182	c182.a1	jgi|Trire2|53567|e_gw1.1.494.1|	1	0	0	1	3	0	1
c183	c183.a1	jgi|Trire2|71094|e_gw1.53.16.1|	1	0	0	3	1	1	0
c184	c184.a1	jgi|Trire2|27395|gw1.10.85.1|GH76|Glycoside Hydrolase Family 76 protein|	1	0	0	3	2	0	0
c185	c185.a1	jgi|Trire2|121534|estExt_fgenesh5_pg.C_80051|4.1.1.1|Pyruvate decarboxylase.|	1	0	0	0	4	0	1
c186	c186.a1	jgi|Trire2|73623|estExt_GeneWisePlus.C_10254|1.14.13.1|Salicylate 1-monooxygenase.|1.14.13.1|Salicylate 1-monooxygenase.|	1	0	0	0	3	0	1
c187	c187.a1	jgi|Trire2|44504|estExt_Genewise1.C_11839|	1	0	1	0	2	1	0
c188	c188.a1	jgi|Trire2|105313|fgenesh5_pg.C_scaffold_5000098|3.2.1.3|Glucan 1,4-alpha-glucosidase.|	1	0	0	1	3	0	0
c189	c189.a1	jgi|Trire2|69189|e_gw1.28.265.1|PL20|Polysaccharide Lyase Family 20 protein|	1	0	0	1	3	0	0
c190	c190.a1	jgi|Trire2|80659|estExt_GeneWisePlus.C_190326|AA3_3|Alcohol oxidase|1.1.99.1|Choline dehydrogenase.|	1	0	0	2	1	0	1
c191	c191.a1	jgi|Trire2|120998|estExt_fgenesh5_pg.C_50325|3.4.16.5|Carboxypeptidase C.|	1	0	0	2	2	0	0
c192	c192.a1	jgi|Trire2|60949|e_gw1.8.724.1|	1	0	0	1	2	0	1
c193	c193.a1	jgi|Trire2|73102|kg2.C_scaffold_50000003|GH39|Glycoside Hydrolase Family 39 protein|	1	0	0	3	1	0	0
c194	c194.a1	jgi|Trire2|68064|e_gw1.23.82.1|GH43|Glycoside Hydrolase Family 43 protein|	1	0	0	2	2	0	0
c195	c195.a1	jgi|Trire2|120911|estExt_fgenesh5_pg.C_50113|1.1.1.-|With NAD(+) or NADP(+) as acceptor.|1.1.1.-|With NAD(+) or NADP(+) as acceptor.|1.1.1.-|With NAD(+) or NADP(+) as acceptor.|1.1.1.-|With NAD(+) or NADP(+) as acceptor.|1.1.1.-|With NAD(+) or NADP(+) as acceptor.|1.1.1.-|With NAD(+) or NADP(+) as acceptor.|1.1.1.-|With NAD(+) or NADP(+) as acceptor.|1.1.1.-|With NAD(+) or NADP(+) as acceptor.|1.…	1	0	0	2	2	0	0
c196	c196.a1	jgi|Trire2|3716|fgenesh1_pm.C_scaffold_8000083|	1	0	0	2	2	0	0
c197	c197.a1	jgi|Trire2|69811|e_gw1.30.32.1|2.3.2.2|Gamma-glutamyltransferase.|2.3.2.2|Gamma-glutamyltransferase.|2.3.2.2|Gamma-glutamyltransferase.|2.3.2.2|Gamma-glutamyltransferase.|2.3.2.2|Gamma-glutamyltransferase.|	1	0	0	2	2	0	0
c198	c198.a1	jgi|Trire2|58117|e_gw1.4.695.1|GH89|Glycoside Hydrolase Family 89 protein|3.2.1.50|Alpha-N-acetylglucosaminidase.|	1	0	0	3	1	0	0
c199	c199.a1	jgi|Trire2|121820|estExt_fgenesh5_pg.C_90192|2.1.1.14|5-methyltetrahydropteroyltriglutamate--homocysteine S-methyltransferase.|	1	0	0	1	2	0	0
c200	c200.a1	jgi|Trire2|122717|estExt_fgenesh5_pg.C_140156|	2	0	0	0	3	0	0
c201	c201.a1	jgi|Trire2|49193|estExt_Genewise1.C_120230|GH17|Glycoside Hydrolase Family 17 protein|3.2.1.58|Glucan 1,3-beta-glucosidase.|	1	0	0	2	1	0	0
c202	c202.a1	jgi|Trire2|21659|estExt_fgenesh1_pm.C_30197|3.4.14.4|Dipeptidyl-peptidase III.|	1	0	0	0	2	0	1
c203	c203.a1	jgi|Trire2|82141|estExt_GeneWisePlus.C_310101|3.4.-.-|Acting on peptide bonds (peptide hydrolases).|3.4.-.-|Acting on peptide bonds (peptide hydrolases).|	1	0	0	2	1	0	0
c204	c204.a1	jgi|Trire2|53961|e_gw1.1.1743.1|3.4.23.18|Aspergillopepsin I.|	1	0	0	1	2	0	0
c205	c205.a1	jgi|Trire2|121814|estExt_fgenesh5_pg.C_90182|2.6.1.44|Alanine--glyoxylate aminotransferase.|2.6.1.44|Alanine--glyoxylate aminotransferase.|	1	0	0	0	2	0	1
c206	c206.a1	jgi|Trire2|74198|estExt_GeneWisePlus.C_11310|GH92|Glycoside Hydrolase Family 92 protein|	1	0	0	2	1	0	0
c207	c207.a1	jgi|Trire2|63526|e_gw1.12.567.1|	1	0	0	2	1	0	0
c208	c208.a1	jgi|Trire2|22564|estExt_fgenesh1_pm.C_120022|	1	0	0	2	1	0	0
c209	c209.a1	jgi|Trire2|109907|fgenesh5_pg.C_scaffold_18000004|	1	0	0	1	2	0	0
c210	c210.a1	jgi|Trire2|66608|e_gw1.19.218.1|3.4.14.-|Dipeptidyl-peptidases and tripeptidyl-peptidases.|	1	0	0	1	2	0	0
c211	c211.a1	jgi|Trire2|76887|estExt_GeneWisePlus.C_60528|3.4.23.24|Candidapepsin.|	1	0	0	1	2	0	0
c212	c212.a1	jgi|Trire2|120229|estExt_fgenesh5_pg.C_20480|GH10|Glycoside Hydrolase Family 10 protein|	1	0	0	0	2	0	1
c213	c213.a1	jgi|Trire2|76266|estExt_GeneWisePlus.C_50155|CBM18-GH16|Carbohydrate-Binding Module Family 18 / Glycoside Hydrolase Family 16 protein|3.2.1.73|Licheninase.|	1	0	0	1	2	0	0
c214	c214.a1	jgi|Trire2|44366|estExt_Genewise1.C_11595|	1	0	0	1	2	0	0
c215	c215.a1	jgi|Trire2|62166|e_gw1.10.402.1|GH2|Glycoside Hydrolase Family 2 protein|3.2.1.25|Beta-mannosidase.|	1	0	0	0	3	0	0
c216	c216.a1	jgi|Trire2|27259|gw1.30.22.1|GH27|Glycoside Hydrolase Family 27 protein|3.2.1.22|Alpha-galactosidase.|3.2.1.22|Alpha-galactosidase.|3.2.1.22|Alpha-galactosidase.|3.2.1.22|Alpha-galactosidase.|	1	0	0	0	2	0	1
c217	c217.a1	jgi|Trire2|72704|kg2.C_scaffold_30000003|GH27|Glycoside Hydrolase Family 27 protein|	1	0	0	2	1	0	0
c218	c218.a1	jgi|Trire2|60422|e_gw1.7.813.1|	1	0	0	1	2	0	0
c219	c219.a1	jgi|Trire2|43873|estExt_Genewise1.C_10578|GH18|Glycoside Hydrolase Family 18 protein|3.2.1.14|Chitinase.|	1	0	0	2	1	0	0
c220	c220.a1	jgi|Trire2|82616|estExt_GeneWisePlus.C_440029|GH5_5|Glycoside Hydrolase Family 5 protein|	1	0	0	2	1	0	0
c221	c221.a1	jgi|Trire2|67844|e_gw1.23.54.1|GH76|Glycoside Hydrolase Family 76 protein|3.2.1.101|Mannan endo-1,6-beta-mannosidase.|	1	0	0	1	2	0	0
c222	c222.a1	jgi|Trire2|121789|estExt_fgenesh5_pg.C_90132|5.3.1.1|Triosephosphate isomerase.|5.3.1.1|Triosephosphate isomerase.|5.3.1.1|Triosephosphate isomerase.|5.3.1.1|Triosephosphate isomerase.|5.3.1.1|Triosephosphate isomerase.|	1	0	0	2	1	0	0
c223	c223.a1	jgi|Trire2|21836|estExt_fgenesh1_pm.C_40245|5.4.2.2|Phosphoglucomutase.|5.4.2.2|Phosphoglucomutase.|5.4.2.2|Phosphoglucomutase.|5.4.2.2|Phosphoglucomutase.|5.4.2.2|Phosphoglucomutase.|5.4.2.2|Phosphoglucomutase.|5.4.2.2|Phosphoglucomutase.|	1	0	1	0	1	0	0
c224	c224.a1	jgi|Trire2|124210|estExt_fgenesh5_pg.C_390017|	1	0	2	0	0	0	0
c225	c225.a1	jgi|Trire2|123071|estExt_fgenesh5_pg.C_170219|	1	0	1	0	1	0	0
c226	c226.a1	jgi|Trire2|70341|e_gw1.35.94.1|GH75|Glycoside Hydrolase Family 75 protein|	1	0	0	0	2	0	0
c227	c227.a1	jgi|Trire2|50593|estExt_Genewise1.C_180099|3.1.3.5|5'-nucleotidase.|3.1.3.5|5'-nucleotidase.|3.1.3.5|5'-nucleotidase.|	1	0	0	0	2	0	0
c228	c228.a1	jgi|Trire2|45085|estExt_Genewise1.C_20918|	1	0	0	0	2	0	0
c229	c229.a1	jgi|Trire2|61127|e_gw1.8.603.1|3.4.16.-|Serine-type carboxypeptidases.|	1	0	0	1	1	0	0
c230	c230.a1	jgi|Trire2|74725|estExt_GeneWisePlus.C_20334|2.6.1.1|Aspartate aminotransferase.|2.6.1.1|Aspartate aminotransferase.|2.6.1.1|Aspartate aminotransferase.|2.6.1.1|Aspartate aminotransferase.|2.6.1.1|Aspartate aminotransferase.|2.6.1.1|Aspartate aminotransferase.|2.6.1.1|Aspartate aminotransferase.|2.6.1.1|Aspartate aminotransferase.|2.6.1.1|Aspartate aminotransferase.|	1	0	0	0	2	0	0
c231	c231.a1	jgi|Trire2|58387|e_gw1.5.683.1|6.2.1.4|Succinate--CoA ligase (GDP-forming).|6.2.1.4|Succinate--CoA ligase (GDP-forming).|	1	0	0	0	1	0	1
c232	c232.a1	jgi|Trire2|123631|estExt_fgenesh5_pg.C_240084|1.5.1.10|Saccharopine dehydrogenase (NADP+, L-glutamate forming).|	1	0	0	0	2	0	0
c233	c233.a1	jgi|Trire2|5807|fgenesh1_pm.C_scaffold_30000009|GH95|Glycoside Hydrolase Family 95 protein|	1	0	0	0	2	0	0
c234	c234.a1	jgi|Trire2|55362|e_gw1.2.175.1|	1	0	1	0	1	0	0
c235	c235.a1	jgi|Trire2|121856|estExt_fgenesh5_pg.C_90250|1.13.11.27|4-hydroxyphenylpyruvate dioxygenase.|1.13.11.27|4-hydroxyphenylpyruvate dioxygenase.|	1	0	0	0	2	0	0
c236	c236.a1	jgi|Trire2|77093|estExt_GeneWisePlus.C_70315|3.1.4.12|Sphingomyelin phosphodiesterase.|	1	0	0	2	0	0	0
c237	c237.a1	jgi|Trire2|81541|estExt_GeneWisePlus.C_250200|GH128|Glycoside Hydrolase Family 128 protein|	1	0	0	1	1	0	0
c238	c238.a1	jgi|Trire2|78713|estExt_GeneWisePlus.C_110315|GH72|Glycoside Hydrolase Family 72 protein|	1	0	0	1	1	0	0
c239	c239.a1	jgi|Trire2|124043|estExt_fgenesh5_pg.C_310058|GH18-CBM1|Glycoside Hydrolase Family 18 / Carbohydrate-Binding Module Family 1 protein|3.2.1.14|Chitinase.|	1	0	0	2	0	0	0

## Sheet: Compare PAI Tre1104 Q-Exa
Proteomics complementary data for Tre1104. Protein Abundance Index (PAI) in each condition (Maltose + Lignin and Lignin) at days 7 and 14 following the Q-Exactive analysis methods.
				Day3_Maltose+Lignin	Day3_Lignin	Day7_Maltose+Lignin	Day7_Lignin	Day14_Maltose+Lignin	Day14_Lignin
Group ID	Sub-group ID	Protein Description	Number of proteins	PAI
a1	a1.a1	jgi|Trire2|1885|fgenesh1_pm.C_scaffold_1000219|GH15-CBM20|Glycoside Hydrolase Family 15 / Carbohydrate-Binding Module Family 20 protein|3.2.1.3|Glucan 1.4-alpha-glucosidase.|	1	1.54545454545455	1.36363636363636	10	2.54545454545455	2.18181818181818	1
a2	a2.a1	jgi|Trire2|70840|e_gw1.42.18.1|	1	0.8	1.2	5.6	4.8	1	1.8
a3	a3.a1	jgi|Trire2|121746|estExt_fgenesh5_pg.C_90034|GH55|Glycoside Hydrolase Family 55 protein|	1	0.684210526315789	0.157894736842105	4.89473684210526	1.42105263157895	1.31578947368421	0.684210526315789
a4	a4.a1	jgi|Trire2|80833|estExt_GeneWisePlus.C_210026|GH18|Glycoside Hydrolase Family 18 protein|3.2.1.14|Chitinase.|	1	0.307692307692308	0.307692307692308	2.69230769230769	3.46153846153846	0.538461538461538	1.76923076923077
a5	a5.a1	jgi|Trire2|55319|e_gw1.2.255.1|GH54-CBM42|Glycoside Hydrolase Family 54 / Carbohydrate-Binding Module Family 42 protein|	1	0.2	0.333333333333333	1.8	1.53333333333333	0.333333333333333	0.6
a5	a5.a2	jgi|Trire2|123283|estExt_fgenesh5_pg.C_190214|GH54-CBM42|Glycoside Hydrolase Family 54 / Carbohydrate-Binding Module Family 42 protein|	1	0.0625	0.25	1.1875	1.5625	0.3125	0.875
a6	a6.a1	jgi|Trire2|49081|estExt_Genewise1.C_120020|GH74-CBM1|Glycoside Hydrolase Family 74 / Carbohydrate-Binding Module Family 1 protein|	1	0.0454545454545455	0.0909090909090909	1.18181818181818	2.13636363636364	0.136363636363636	0.272727272727273
a7	a7.a1	jgi|Trire2|65406|e_gw1.16.441.1|GH16|Glycoside Hydrolase Family 16 protein|	1	0.454545454545455	0.272727272727273	3.09090909090909	2.81818181818182	0.636363636363636	1
a8	a8.a1	jgi|Trire2|54242|e_gw1.1.1341.1|GH55|Glycoside Hydrolase Family 55 protein|	1	0.357142857142857	0.428571428571429	3	2.5	0.5	0.5
a9	a9.a1	jgi|Trire2|120873|estExt_fgenesh5_pg.C_50016|GH71-CBM24-CBM24|Glycoside Hydrolase Family 71 / Carbohydrate-Binding Module Family 24 protein|3.2.1.59|Glucan endo-1.3-alpha-glucosidase.|	1	0.0625	0.125	2.875	2.6875	0.1875	0.8125
b10	b10.a1	jgi|Trire2|72526|kg2.C_scaffold_28000022|GH67|Glycoside Hydrolase Family 67 protein|	1		0.323529411764706	0.970588235294118	1.05882352941176	0.205882352941176	0.352941176470588
b11	b11.a1	jgi|Trire2|123989|estExt_fgenesh5_pg.C_290113|GH7-CBM1|Glycoside Hydrolase Family 7 / Carbohydrate-Binding Module Family 1 protein|	1	0.1	0.2	1.5	2.5	0.3	0.6
b12	b12.a1	jgi|Trire2|124016|estExt_fgenesh5_pg.C_300077|GH36|Glycoside Hydrolase Family 36 protein|3.2.1.22|Alpha-galactosidase.|3.2.1.22|Alpha-galactosidase.|3.2.1.22|Alpha-galactosidase.|3.2.1.22|Alpha-galactosidase.|	1		0.263157894736842	1.10526315789474	1.10526315789474	0.526315789473684	0.947368421052632
b13	b13.a1	jgi|Trire2|121127|estExt_fgenesh5_pg.C_60038|GH3|Glycoside Hydrolase Family 3 protein|3.2.1.21|Beta-glucosidase.|3.2.1.21|Beta-glucosidase.|3.2.1.21|Beta-glucosidase.|	1	0.0952380952380952	0.571428571428571	1.52380952380952	1.23809523809524	0.142857142857143	0.523809523809524
b14	b14.a1	jgi|Trire2|21725|estExt_fgenesh1_pm.C_40061|GH20|Glycoside Hydrolase Family 20 protein|3.2.1.52|Beta-N-acetylhexosaminidase.|3.2.1.52|Beta-N-acetylhexosaminidase.|3.2.1.52|Beta-N-acetylhexosaminidase.|3.2.1.52|Beta-N-acetylhexosaminidase.|3.2.1.52|Beta-N-acetylhexosaminidase.|	1	0.136363636363636	0.0454545454545455	1.04545454545455	0.954545454545455	0.318181818181818	0.681818181818182
b15	b15.a1	jgi|Trire2|69863|e_gw1.31.20.1|6.3.5.-|Carbon--nitrogen ligases with glutamine as amido-N-donor.|6.3.5.-|Carbon--nitrogen ligases with glutamine as amido-N-donor.|	1	0.05	0.55	1.2	1.7	0.1	0.25
b16	b16.a1	jgi|Trire2|124175|estExt_fgenesh5_pg.C_370018|GH64|Glycoside Hydrolase Family 64 protein|	1	0.125	0.25	3.625	2.5	0.875	0.875
b17	b17.a1	jgi|Trire2|39942|gw1.11.503.1|GH17|Glycoside Hydrolase Family 17 protein|3.2.1.58|Glucan 1.3-beta-glucosidase.|	1	0.2	0.1	1.9	1.6	0.1	0.3
b18	b18.a1	jgi|Trire2|124282|estExt_fgenesh5_pg.C_480011|AA5_1|Copper radical oxidase|	1	0.0357142857142857	0.0714285714285714	0.964285714285714	0.892857142857143	0.25	0.285714285714286
b19	b19.a1	jgi|Trire2|82235|estExt_GeneWisePlus.C_330081|GH31|Glycoside Hydrolase Family 31 protein|3.2.1.20|Alpha-glucosidase.|3.2.1.20|Alpha-glucosidase.|	1	0.173913043478261	0.0434782608695652	1.43478260869565	0.652173913043478	0.217391304347826	0.304347826086957
b20	b20.a1	jgi|Trire2|105956|fgenesh5_pg.C_scaffold_6000182|GH13_1|Glycoside Hydrolase Family 13 protein|3.2.1.1|Alpha-amylase.|	1	0.222222222222222	0.222222222222222	2.77777777777778	0.444444444444444	0.111111111111111	0.333333333333333
b21	b21.a1	jgi|Trire2|69245|e_gw1.28.19.1|GH2|Glycoside Hydrolase Family 2 protein|3.2.1.25|Beta-mannosidase.|	1	0.227272727272727	0.0909090909090909	1.13636363636364	0.409090909090909	0.318181818181818	0.363636363636364
b22	b22.a1	jgi|Trire2|123726|estExt_fgenesh5_pg.C_250133|GH16|Glycoside Hydrolase Family 16 protein|	1	0.2	0.4	4	2.6	0.8	1.2
b23	b23.a1	jgi|Trire2|55733|e_gw1.2.121.1|GH92|Glycoside Hydrolase Family 92 protein|	1	0.03125	0.03125	0.875	0.5	0.25	0.3125
b24	b24.a1	jgi|Trire2|71532|kg2.C_scaffold_10000059|GH71|Glycoside Hydrolase Family 71 protein|3.2.1.59|Glucan endo-1.3-alpha-glucosidase.|	1	0.1	0.2	1.8	1.1	0.2	0.4
b25	b25.a1	jgi|Trire2|77579|estExt_GeneWisePlus.C_80475|3.4.23.25|Saccharopepsin.|	1		0.25	2.5	2	0.625	0.875
b26	b26.a1	jgi|Trire2|70845|e_gw1.42.21.1|GH55|Glycoside Hydrolase Family 55 protein|	1	0.111111111111111	0.222222222222222	0.62962962962963	0.555555555555556	0.148148148148148	0.259259259259259
b27	b27.a1	jgi|Trire2|22914|estExt_fgenesh1_pm.C_180019|GH72-CBM43|Glycoside Hydrolase Family 72 / Carbohydrate-Binding Module Family 43 protein|	1	0.0555555555555556	0.166666666666667	1.38888888888889	1.33333333333333	0.222222222222222	0.277777777777778
b28	b28.a1	jgi|Trire2|82662|estExt_GeneWisePlus.C_540005|EXPN|Distantly related to plant expansins|	1	0.5	0.5	1.5	1	0.833333333333333	1.33333333333333
b29	b29.a1	jgi|Trire2|121735|estExt_fgenesh5_pg.C_90015|GH3|Glycoside Hydrolase Family 3 protein|3.2.1.21|Beta-glucosidase.|3.2.1.21|Beta-glucosidase.|3.2.1.21|Beta-glucosidase.|	1	0.129032258064516	0.0967741935483871	0.741935483870968	0.387096774193548	0.290322580645161	0.0967741935483871
b30	b30.a1	jgi|Trire2|123456|estExt_fgenesh5_pg.C_220028|GH65-CBM32|Glycoside Hydrolase Family 65 / Carbohydrate-Binding Module Family 32 protein|3.2.1.28|Alpha.alpha-trehalase.|	1	0.12	0.16	0.92	0.44	0.16	0.2
b31	b31.a1	jgi|Trire2|123818|estExt_fgenesh5_pg.C_270048|GH11|Glycoside Hydrolase Family 11 protein|	1		1	2.5	5	0.5	1.5
b32	b32.a1	jgi|Trire2|71170|e_gw1.69.4.1|	1			1.16666666666667	0.583333333333333	0.166666666666667	0.166666666666667
b33	b33.a1	jgi|Trire2|74282|estExt_GeneWisePlus.C_11554|3.4.21.-|Serine endopeptidases.|	1	0.0188679245283019		0.30188679245283	0.188679245283019	0.358490566037736	0.207547169811321
b34	b34.a1	jgi|Trire2|74156|estExt_GeneWisePlus.C_11223|3.4.23.18|Aspergillopepsin I.|	1	0.111111111111111	0.333333333333333	1.11111111111111	1.44444444444444	0.333333333333333	0.888888888888889
b35	b35.a1	jgi|Trire2|82633|estExt_GeneWisePlus.C_460047|GH72-CBM43|Glycoside Hydrolase Family 72 / Carbohydrate-Binding Module Family 43 protein|	1	0.0714285714285714	0.214285714285714	1.5	0.571428571428571	0.428571428571429	0.214285714285714
b36	b36.a1	jgi|Trire2|80240|estExt_GeneWisePlus.C_170350|GH35|Glycoside Hydrolase Family 35 protein|3.2.1.23|Beta-galactosidase.|3.2.1.23|Beta-galactosidase.|3.2.1.23|Beta-galactosidase.|3.2.1.23|Beta-galactosidase.|3.2.1.23|Beta-galactosidase.|	1	0.03125	0.03125	0.59375	0.5	0.03125	0.25
b37	b37.a1	jgi|Trire2|110894|fgenesh5_pg.C_scaffold_23000032|GH30_5|Glycoside Hydrolase Family 30 protein|	1		0.230769230769231	1.07692307692308	1.53846153846154	0.230769230769231	0.384615384615385
b38	b38.a1	jgi|Trire2|111849|fgenesh5_pg.C_scaffold_29000119|GH30_7|Glycoside Hydrolase Family 30 protein|3.2.1.45|Glucosylceramidase.|	1	0.0625	0.3125	0.9375	0.75	0.1875	0.3125
b39	b39.a1	jgi|Trire2|123226|estExt_fgenesh5_pg.C_190074|GH37|Glycoside Hydrolase Family 37 protein|	1	0.08	0.08	0.44	0.48	0.16	0.24
b40	b40.a1	jgi|Trire2|104797|fgenesh5_pg.C_scaffold_4000175|GH3|Glycoside Hydrolase Family 3 protein|3.2.1.21|Beta-glucosidase.|3.2.1.21|Beta-glucosidase.|3.2.1.21|Beta-glucosidase.|	1			0.645161290322581	0.354838709677419	0.193548387096774	0.225806451612903
b41	b41.a1	jgi|Trire2|64397|e_gw1.14.346.1|	1	0.0476190476190476	0.0476190476190476	0.952380952380952	0.523809523809524	0.238095238095238	0.238095238095238
b42	b42.a1	jgi|Trire2|104461|fgenesh5_pg.C_scaffold_3000416|	1	0.2	0.2	1.4	0.6	0.2	0.3
b43	b43.a1	jgi|Trire2|58450|e_gw1.5.72.1|GH3|Glycoside Hydrolase Family 3 protein|3.2.1.21|Beta-glucosidase.|3.2.1.21|Beta-glucosidase.|3.2.1.21|Beta-glucosidase.|	1	0.0588235294117647	0.117647058823529	0.647058823529412	0.647058823529412	0.352941176470588	0.352941176470588
b44	b44.a1	jgi|Trire2|75159|estExt_GeneWisePlus.C_30106|	1			0.239130434782609	0.41304347826087		0.152173913043478
b45	b45.a1	jgi|Trire2|76210|estExt_GeneWisePlus.C_50020|GH62|Glycoside Hydrolase Family 62 protein|	1			1.33333333333333	1.66666666666667		0.333333333333333
b46	b46.a1	jgi|Trire2|60635|e_gw1.8.68.1|GH92|Glycoside Hydrolase Family 92 protein|	1	0.03125	0.03125	0.4375	0.34375	0.125	0.15625
b47	b47.a1	jgi|Trire2|44214|estExt_Genewise1.C_11181|CE5|Carbohydrate Esterase Family 5 protein|	1	0.285714285714286	0.285714285714286	1.57142857142857	1	0.428571428571429	0.428571428571429
b48	b48.a1	jgi|Trire2|58282|e_gw1.5.46.1|	1			0.243243243243243	0.486486486486487		0.216216216216216
b49	b49.a1	jgi|Trire2|73631|estExt_GeneWisePlus.C_10262|	1		0.125	0.5	1		0.1875
b50	b50.a1	jgi|Trire2|121418|estExt_fgenesh5_pg.C_70291|CE16|Carbohydrate Esterase Family 16 protein|	1	0.0909090909090909	0.0909090909090909	0.727272727272727	0.545454545454545	0.0909090909090909	0.272727272727273
b51	b51.a1	jgi|Trire2|122780|estExt_fgenesh5_pg.C_150014|GH28|Glycoside Hydrolase Family 28 protein|	1			0.692307692307692	0.769230769230769	0.153846153846154	0.538461538461538
b52	b52.a1	jgi|Trire2|72632|kg2.C_scaffold_3000067|GH27|Glycoside Hydrolase Family 27 protein|3.2.1.22|Alpha-galactosidase.|3.2.1.22|Alpha-galactosidase.|3.2.1.22|Alpha-galactosidase.|3.2.1.22|Alpha-galactosidase.|	1		0.25	1.08333333333333	1	0.0833333333333333	0.25
b53	b53.a1	jgi|Trire2|57098|e_gw1.3.616.1|GH92|Glycoside Hydrolase Family 92 protein|	1		0.0454545454545455	0.681818181818182	0.5	0.0909090909090909	0.181818181818182
b54	b54.a1	jgi|Trire2|73523|estExt_GeneWisePlus.C_10057|	1	0.0454545454545455	0.181818181818182	0.590909090909091	0.409090909090909	0.0909090909090909	0.136363636363636
b55	b55.a1	jgi|Trire2|81070|estExt_GeneWisePlus.C_220116|3.4.11.-|Aminopeptidases.|	1		0.25	0.583333333333333	0.75	0.166666666666667	0.416666666666667
b56	b56.a1	jgi|Trire2|77299|estExt_GeneWisePlus.C_70730|GH2|Glycoside Hydrolase Family 2 protein|3.2.1.25|Beta-mannosidase.|	1		0.0588235294117647	0.147058823529412	0.470588235294118	0.0294117647058824	0.235294117647059
b57	b57.a1	jgi|Trire2|76672|estExt_GeneWisePlus.C_60045|GH3|Glycoside Hydrolase Family 3 protein|3.2.1.21|Beta-glucosidase.|3.2.1.21|Beta-glucosidase.|3.2.1.21|Beta-glucosidase.|	1			0.272727272727273	0.818181818181818		0.272727272727273
b58	b58.a1	jgi|Trire2|45445|estExt_Genewise1.C_30504|	1	0.0909090909090909	0.0454545454545455	0.545454545454545	0.318181818181818	0.136363636363636	0.0909090909090909
b59	b59.a1	jgi|Trire2|79606|estExt_GeneWisePlus.C_140316|GH115|Glycoside Hydrolase Family 115 protein|	1			0.156862745098039	0.176470588235294	0.0784313725490196	0.156862745098039
b60	b60.a1	jgi|Trire2|73248|kg2.C_scaffold_7000057|GH55|Glycoside Hydrolase Family 55 protein|	1		0.09375	0.3125	0.34375	0.03125	0.125
b61	b61.a1	jgi|Trire2|121475|estExt_fgenesh5_pg.C_70445|	1			0.705882352941177	0.647058823529412	0.0588235294117647	0.176470588235294
b62	b62.a1	jgi|Trire2|123992|estExt_fgenesh5_pg.C_290118|CBM1-EXPN|Carbohydrate-Binding Module Family 1 / Distantly related to plant expansins|	1		0.181818181818182	0.909090909090909	0.727272727272727	0.0909090909090909	0.181818181818182
b63	b63.a1	jgi|Trire2|58802|e_gw1.5.84.1|GH95|Glycoside Hydrolase Family 95 protein|	1		0.16	0.2	0.6		0.12
b64	b64.a1	jgi|Trire2|124051|estExt_fgenesh5_pg.C_320018|3.4.-.-|Acting on peptide bonds (peptide hydrolases).|3.4.-.-|Acting on peptide bonds (peptide hydrolases).|	1		0.133333333333333	0.466666666666667	0.666666666666667	0.2	0.2
b65	b65.a1	jgi|Trire2|78828|estExt_GeneWisePlus.C_110504|3.1.1.1|Carboxylesterase.|	1		0.176470588235294	0.470588235294118	0.588235294117647	0.0588235294117647	0.235294117647059
b66	b66.a1	jgi|Trire2|122127|estExt_fgenesh5_pg.C_100337|	1	0.222222222222222	0.111111111111111	1	0.666666666666667	0.333333333333333	0.333333333333333
b67	b67.a1	jgi|Trire2|58563|e_gw1.5.211.1|	1	0.0833333333333333		0.916666666666667	0.0833333333333333	0.333333333333333
b68	b68.a1	jgi|Trire2|3094|fgenesh1_pm.C_scaffold_5000055|GH30_3|Glycoside Hydrolase Family 30 protein|	1	0.333333333333333		2.66666666666667	1.66666666666667	1	0.333333333333333
b69	b69.a1	jgi|Trire2|119805|estExt_fgenesh5_pg.C_10576|	1		0.333333333333333	1.66666666666667	1.66666666666667		0.666666666666667
b70	b70.a1	jgi|Trire2|120784|estExt_fgenesh5_pg.C_40418|5.1.3.3|Aldose 1-epimerase.|	1			0.5625	0.375	0.1875	0.1875
b71	b71.a1	jgi|Trire2|66792|e_gw1.19.77.1|GH17|Glycoside Hydrolase Family 17 protein|3.2.1.58|Glucan 1.3-beta-glucosidase.|	1		0.0666666666666667	0.466666666666667	0.666666666666667	0.0666666666666667	0.0666666666666667
b72	b72.a1	jgi|Trire2|123039|estExt_fgenesh5_pg.C_170159|	1	0.2	0.2	1	0.8	0.2	0.4
b73	b73.a1	jgi|Trire2|110171|fgenesh5_pg.C_scaffold_19000056|3.3.1.1|Adenosylhomocysteinase.|3.3.1.1|Adenosylhomocysteinase.|	1			0.111111111111111	0.666666666666667		0.333333333333333
b74	b74.a1	jgi|Trire2|119735|estExt_fgenesh5_pg.C_10410|1.2.1.12|Glyceraldehyde 3-phosphate dehydrogenase (phosphorylating).|1.2.1.12|Glyceraldehyde 3-phosphate dehydrogenase (phosphorylating).|	1			0.7	0.9	0.2	0.2
b75	b75.a1	jgi|Trire2|72567|kg2.C_scaffold_3000002|CBM1-GH6|Carbohydrate-Binding Module Family 1 / Glycoside Hydrolase Family 6 protein|	1			0.5	0.583333333333333		0.333333333333333
b76	b76.a1	jgi|Trire2|111694|fgenesh5_pg.C_scaffold_28000107|3.4.13.19|Membrane dipeptidase.|	1		0.0434782608695652	0.434782608695652	0.260869565217391	0.0434782608695652	0.0434782608695652
b77	b77.a1	jgi|Trire2|105860|fgenesh5_pg.C_scaffold_6000086|	1			2.25	1.5	0.5	0.5
b78	b78.a1	jgi|Trire2|66616|e_gw1.19.24.1|3.1.3.2|Acid phosphatase.|3.1.3.2|Acid phosphatase.|	1			0.9	0.4	0.1	0.2
b79	b79.a1	jgi|Trire2|74223|estExt_GeneWisePlus.C_11372|GH11|Glycoside Hydrolase Family 11 protein|	1			1.66666666666667	1.66666666666667		0.333333333333333
b80	b80.a1	jgi|Trire2|79807|estExt_GeneWisePlus.C_150299|3.4.23.3|Gastricsin.|	1		0.0666666666666667	0.4	0.2	0.0666666666666667	0.0666666666666667
b81	b81.a1	jgi|Trire2|73638|estExt_GeneWisePlus.C_10269|CBM1|Carbohydrate-Binding Module Family 1 protein|	1		0.2	0.8	1.2	0.2	0.2
b82	b82.a1	jgi|Trire2|119989|estExt_fgenesh5_pg.C_20004|	1			2.5	3	0.5	1
b83	b83.a1	jgi|Trire2|59665|e_gw1.6.57.1|	1		0.0555555555555556	0.444444444444444	0.277777777777778	0.0555555555555556	0.0555555555555556
b84	b84.a1	jgi|Trire2|59508|e_gw1.6.152.1|3.1.1.7|Acetylcholinesterase.|	1		0.111111111111111	0.777777777777778	0.666666666666667		0.111111111111111
b85	b85.a1	jgi|Trire2|122081|estExt_fgenesh5_pg.C_100226|GH7-CBM1|Glycoside Hydrolase Family 7 / Carbohydrate-Binding Module Family 1 protein|	1			0.666666666666667	0.5	0.333333333333333	0.333333333333333
b86	b86.a1	jgi|Trire2|121989|estExt_fgenesh5_pg.C_100051|	1			0.192307692307692	0.230769230769231		0.153846153846154
b87	b87.a1	jgi|Trire2|81517|estExt_GeneWisePlus.C_250157|	1			0.204545454545455	0.0909090909090909	0.0227272727272727	0.0227272727272727
b88	b88.a1	jgi|Trire2|102908|fgenesh5_pg.C_scaffold_1000541|	1			1.2	0.8	0.2	0.2
b89	b89.a1	jgi|Trire2|31248|gw1.2.425.1|3.1.27.1|Ribonuclease T2.|	1	0.1	0.1	0.3	0.4	0.1	0.2
b90	b90.a1	jgi|Trire2|123026|estExt_fgenesh5_pg.C_170136|	1			0.375	0.375		0.125
b91	b91.a1	jgi|Trire2|65156|e_gw1.15.351.1|	1		0.142857142857143	0.428571428571429	0.714285714285714	0.285714285714286	0.285714285714286
b92	b92.a1	jgi|Trire2|54694|e_gw1.1.623.1|1.1.1.-|With NAD(+) or NADP(+) as acceptor.|1.1.1.-|With NAD(+) or NADP(+) as acceptor.|1.1.1.-|With NAD(+) or NADP(+) as acceptor.|1.1.1.-|With NAD(+) or NADP(+) as acceptor.|1.1.1.-|With NAD(+) or NADP(+) as acceptor.|1.1.1.-|With NAD(+) or NADP(+) as acceptor.|1.1.1.-|With NAD(+) or NADP(+) as acceptor.|1.1.1.-|With NAD(+) or NADP(+) as acceptor.|1.1.1.-|With NAD…	1		0.2	0.133333333333333	0.266666666666667	0.133333333333333	0.133333333333333
b93	b93.a1	jgi|Trire2|64193|e_gw1.13.303.1|3.4.17.21|Glutamate carboxypeptidase II.|	1			0.3	0.25		0.1
b94	b94.a1	jgi|Trire2|106575|fgenesh5_pg.C_scaffold_7000376|GH79|Glycoside Hydrolase Family 79 protein|	1		0.0833333333333333	0.5	0.166666666666667	0.0833333333333333	0.166666666666667
b95	b95.a1	jgi|Trire2|51365|estExt_Genewise1.C_220234|	1		0.0454545454545455	0.181818181818182	0.181818181818182	0.0454545454545455	0.136363636363636
b96	b96.a1	jgi|Trire2|45717|estExt_Genewise1.C_31037|GH47|Glycoside Hydrolase Family 47 protein|3.2.1.113|Mannosyl-oligosaccharide 1.2-alpha-mannosidase.|	1			0.533333333333333	0.333333333333333
b97	b97.a1	jgi|Trire2|102837|fgenesh5_pg.C_scaffold_1000470|	1	0.666666666666667	0.333333333333333	1	1.33333333333333	0.333333333333333	0.333333333333333
b98	b98.a1	jgi|Trire2|58333|e_gw1.5.640.1|	1			0.6	0.4	0.1	0.1
b99	b99.a1	jgi|Trire2|70803|e_gw1.41.6.1|1.11.1.11|L-ascorbate peroxidase.|	1			0.1	0.233333333333333		0.0666666666666667
c100	c100.a1	jgi|Trire2|104401|fgenesh5_pg.C_scaffold_3000356|3.2.1.14|Chitinase.|	1			2	2
c101	c101.a1	jgi|Trire2|107850|fgenesh5_pg.C_scaffold_10000240|CE1|Carbohydrate Esterase Family 1 protein|	1		0.333333333333333	1	1	0.333333333333333	0.666666666666667
c102	c102.a1	jgi|Trire2|71394|kg2.C_scaffold_1000179|GH79|Glycoside Hydrolase Family 79 protein|	1		0.0769230769230769	0.307692307692308	0.307692307692308	0.0769230769230769	0.0769230769230769
c103	c103.a1	jgi|Trire2|104277|fgenesh5_pg.C_scaffold_3000232|	1		0.333333333333333	1	1.33333333333333		0.666666666666667
c104	c104.a1	jgi|Trire2|62213|e_gw1.10.542.1|	1			0.25	0.25		0.05
c105	c105.a1	jgi|Trire2|65483|e_gw1.16.447.1|	1			0.375	0.75		0.25
c106	c106.a1	jgi|Trire2|82623|estExt_GeneWisePlus.C_450028|3.4.14.9|Tripeptidyl-peptidase I.|	1		0.181818181818182	0.272727272727273	0.363636363636364		0.181818181818182
c107	c107.a1	jgi|Trire2|76971|estExt_GeneWisePlus.C_70055|	1			1.16666666666667
c108	c108.a1	jgi|Trire2|22915|estExt_fgenesh1_pm.C_180020|AA3_2|GMC oxidoreductase|	1			0.35	0.15		0.05
c109	c109.a1	jgi|Trire2|79921|estExt_GeneWisePlus.C_160157|GH92|Glycoside Hydrolase Family 92 protein|	1			0.05	0.4		0.05
c110	c110.a1	jgi|Trire2|103458|fgenesh5_pg.C_scaffold_2000046|GH25|Glycoside Hydrolase Family 25 protein|	1		0.333333333333333	1	1.33333333333333	0.333333333333333	0.333333333333333
c111	c111.a1	jgi|Trire2|110848|fgenesh5_pg.C_scaffold_22000161|	1		0.125	0.25	0.375		0.125
c112	c112.a1	jgi|Trire2|59391|e_gw1.6.87.1|GH27|Glycoside Hydrolase Family 27 protein|	1		0.0555555555555556	0.166666666666667	0.222222222222222		0.111111111111111
c113	c113.a1	jgi|Trire2|107881|fgenesh5_pg.C_scaffold_10000271|	1			0.625	0.375	0.125	0.125
c114	c114.a1	jgi|Trire2|81778|estExt_GeneWisePlus.C_270210|	1			0.192307692307692	0.115384615384615		0.0769230769230769
c115	c115.a1	jgi|Trire2|50390|estExt_Genewise1.C_170177|	1		0.0434782608695652	0.217391304347826	0.173913043478261
c116	c116.a1	jgi|Trire2|68067|e_gw1.23.74.1|	1			0.333333333333333	0.333333333333333
c117	c117.a1	jgi|Trire2|122374|estExt_fgenesh5_pg.C_120035|	1			1.33333333333333	1		0.666666666666667
c118	c118.a1	jgi|Trire2|47268|estExt_Genewise1.C_70352|GH3|Glycoside Hydrolase Family 3 protein|3.2.1.21|Beta-glucosidase.|3.2.1.21|Beta-glucosidase.|3.2.1.21|Beta-glucosidase.|	1			0.1875	0.125
c119	c119.a1	jgi|Trire2|21960|estExt_fgenesh1_pm.C_50195|	1			0.411764705882353	0.176470588235294
c120	c120.a1	jgi|Trire2|103049|fgenesh5_pg.C_scaffold_1000682|GH28|Glycoside Hydrolase Family 28 protein|3.2.1.15|Polygalacturonase.|3.2.1.15|Polygalacturonase.|	1			0.8	0.8	0.2
c121	c121.a1	jgi|Trire2|5776|fgenesh1_pm.C_scaffold_29000020|5.3.1.9|Glucose-6-phosphate isomerase.|5.3.1.9|Glucose-6-phosphate isomerase.|5.3.1.9|Glucose-6-phosphate isomerase.|	1			0.192307692307692	0.115384615384615		0.0384615384615385
c122	c122.a1	jgi|Trire2|69276|e_gw1.28.211.1|GH30_7|Glycoside Hydrolase Family 30 protein|3.2.1.45|Glucosylceramidase.|	1			0.181818181818182	0.545454545454545		0.0909090909090909
c123	c123.a1	jgi|Trire2|112018|fgenesh5_pg.C_scaffold_31000056|	1			1.2	0.2	0.2	0.2
c124	c124.a1	jgi|Trire2|73643|estExt_GeneWisePlus.C_10274|AA9-CBM1|Lytic polysaccharide monooxygenase (formerly GH61) / Carbohydrate-Binding Module Family 1 protein|	1		0.333333333333333	0.333333333333333	1	0.333333333333333	0.333333333333333
c125	c125.a1	jgi|Trire2|111818|fgenesh5_pg.C_scaffold_29000088|3.4.23.24|Candidapepsin.|	1			0.4	1.2
c126	c126.a1	jgi|Trire2|78357|estExt_GeneWisePlus.C_100319|AA6|Benzoquinone reductase|	1			1.2	0.4		0.2
c127	c127.a1	jgi|Trire2|108672|fgenesh5_pg.C_scaffold_13000018|GH71-CBM24-CBM24|Glycoside Hydrolase Family 71 / Carbohydrate-Binding Module Family 24 protein|3.2.1.59|Glucan endo-1.3-alpha-glucosidase.|	1			0.357142857142857	0.285714285714286
c128	c128.a1	jgi|Trire2|111495|fgenesh5_pg.C_scaffold_27000066|	1		0.5	1	1		0.5
c129	c129.a1	jgi|Trire2|56830|e_gw1.3.133.1|3.1.1.1|Carboxylesterase.|	1			0.272727272727273	0.272727272727273	0.0909090909090909	0.0909090909090909
c130	c130.a1	jgi|Trire2|123029|estExt_fgenesh5_pg.C_170139|	1		0.166666666666667	0.666666666666667	0.5
c131	c131.a1	jgi|Trire2|60784|e_gw1.8.587.1|	1		0.0909090909090909	0.272727272727273	0.181818181818182	0.0909090909090909	0.0909090909090909
c132	c132.a1	jgi|Trire2|69489|e_gw1.29.29.1|3.4.16.5|Carboxypeptidase C.|	1			0.105263157894737	0.105263157894737	0.105263157894737	0.105263157894737
c133	c133.a1	jgi|Trire2|73604|estExt_GeneWisePlus.C_10225|3.1.3.2|Acid phosphatase.|3.1.3.2|Acid phosphatase.|	1			0.15	0.15	0.05	0.05
c134	c134.a1	jgi|Trire2|122233|estExt_fgenesh5_pg.C_110101|1.1.1.85|3-isopropylmalate dehydrogenase.|	1			0.25	0.0625	0.0625	0.125
c135	c135.a1	jgi|Trire2|76155|estExt_GeneWisePlus.C_40925|	1			0.266666666666667	0.266666666666667
c136	c136.a1	jgi|Trire2|73256|kg2.C_scaffold_7000065|GH81|Glycoside Hydrolase Family 81 protein|	1			0.368421052631579	0.0526315789473684
c137	c137.a1	jgi|Trire2|23346|estExt_fgenesh1_pm.C_290025|GH20|Glycoside Hydrolase Family 20 protein|3.2.1.52|Beta-N-acetylhexosaminidase.|3.2.1.52|Beta-N-acetylhexosaminidase.|3.2.1.52|Beta-N-acetylhexosaminidase.|3.2.1.52|Beta-N-acetylhexosaminidase.|3.2.1.52|Beta-N-acetylhexosaminidase.|	1			0.103448275862069	0.137931034482759		0.0344827586206897
c138	c138.a1	jgi|Trire2|122487|estExt_fgenesh5_pg.C_120255|	1			3	1
c139	c139.a1	jgi|Trire2|120312|estExt_fgenesh5_pg.C_30013|CBM1-GH5_5|Carbohydrate-Binding Module Family 1 / Glycoside Hydrolase Family 5 protein|	1			1.33333333333333	1
c140	c140.a1	jgi|Trire2|63416|e_gw1.12.549.1|	1	0.2		0.4	0.2	0.2	0.2
c141	c141.a1	jgi|Trire2|56996|e_gw1.3.372.1|GH5_7|Glycoside Hydrolase Family 5 protein|	1			0.333333333333333	0.666666666666667		0.166666666666667
c142	c142.a1	jgi|Trire2|71092|e_gw1.53.15.1|3.1.3.2|Acid phosphatase.|3.1.3.2|Acid phosphatase.|	1			0.230769230769231	0.153846153846154	0.0769230769230769	0.0769230769230769
c143	c143.a1	jgi|Trire2|70373|e_gw1.35.52.1|GH125|Glycoside Hydrolase Family 125 protein|	1			0.153846153846154	0.307692307692308	0.0769230769230769
c144	c144.a1	jgi|Trire2|80980|estExt_GeneWisePlus.C_210298|	1			0.125	0.125		0.1875
c145	c145.a1	jgi|Trire2|120568|estExt_fgenesh5_pg.C_40047|4.2.1.11|Phosphopyruvate hydratase.|4.2.1.11|Phosphopyruvate hydratase.|	1			0.111111111111111	0.222222222222222		0.0555555555555556
c146	c146.a1	jgi|Trire2|4213|fgenesh1_pm.C_scaffold_11000030|3.1.27.1|Ribonuclease T2.|	1			0.666666666666667	0.166666666666667		0.333333333333333
c147	c147.a1	jgi|Trire2|105275|fgenesh5_pg.C_scaffold_5000060|	1	0.166666666666667		0.666666666666667		0.166666666666667	0.166666666666667
c148	c148.a1	jgi|Trire2|47127|estExt_Genewise1.C_70057|3.4.11.22|Aminopeptidase I|	1			0.111111111111111	0.222222222222222		0.0555555555555556
c149	c149.a1	jgi|Trire2|69736|e_gw1.30.36.1|GH30_3|Glycoside Hydrolase Family 30 protein|3.2.1.45|Glucosylceramidase.|	1			0.133333333333333	0.266666666666667		0.0666666666666667
c150	c150.a1	jgi|Trire2|121133|estExt_fgenesh5_pg.C_60052|3.4.23.18|Aspergillopepsin I.|	1			0.333333333333333	0.25
c151	c151.a1	jgi|Trire2|119568|estExt_fgenesh5_pg.C_10101|	1			1	1.5
c152	c152.a1	jgi|Trire2|49274|estExt_Genewise1.C_120332|GH16|Glycoside Hydrolase Family 16 protein|	1			0.6	0.6		0.2
c153	c153.a1	jgi|Trire2|120821|estExt_fgenesh5_pg.C_40485|	1			0.5	0.5
c154	c154.a1	jgi|Trire2|102735|fgenesh5_pg.C_scaffold_1000368|	1		0.0714285714285714	0.0714285714285714	0.214285714285714		0.0714285714285714
c155	c155.a1	jgi|Trire2|79448|estExt_GeneWisePlus.C_140046|	1			0.125	0.625
c156	c156.a1	jgi|Trire2|3196|fgenesh1_pm.C_scaffold_5000157|GH38|Glycoside Hydrolase Family 38 protein|3.2.1.24|Alpha-mannosidase.|	1			0.0392156862745098	0.0196078431372549	0.0196078431372549	0.0392156862745098
c157	c157.a1	jgi|Trire2|122076|estExt_fgenesh5_pg.C_100212|3.4.23.24|Candidapepsin.|	1			0.4	0.2		0.2
c158	c158.a1	jgi|Trire2|121298|estExt_fgenesh5_pg.C_70028|1.2.1.2|Formate dehydrogenase.|1.2.1.2|Formate dehydrogenase.|	1			0.0714285714285714	0.285714285714286		0.0714285714285714
c159	c159.a1	jgi|Trire2|120635|estExt_fgenesh5_pg.C_40157|2.2.1.1|Transketolase.|2.2.1.1|Transketolase.|	1				0.227272727272727		0.0454545454545455
c160	c160.a1	jgi|Trire2|73632|estExt_GeneWisePlus.C_10263|CE5-CBM1|Carbohydrate Esterase Family 5 / Carbohydrate-Binding Module Family 1 protein|	1		0.5	0.25	0.5		0.25
c161	c161.a1	jgi|Trire2|123244|estExt_fgenesh5_pg.C_190118|	1			0.15	0.1		0.05
c162	c162.a1	jgi|Trire2|123967|estExt_fgenesh5_pg.C_290049|	1		0.5	1	0.5	0.5	0.5
c163	c163.a1	jgi|Trire2|122794|estExt_fgenesh5_pg.C_150066|	1	0.125	0.125	0.375	0.125
c164	c164.a1	jgi|Trire2|22129|estExt_fgenesh1_pm.C_70158|AA11|Lytic polysaccharide monooxygenase|	1			0.5	0.125	0.125
c165	c165.a1	jgi|Trire2|122529|estExt_fgenesh5_pg.C_130079|3.1.-.-|Acting on ester bonds.|	1			0.2	0.3		0.1
c166	c166.a1	jgi|Trire2|80920|estExt_GeneWisePlus.C_210182|1.1.1.1|Alcohol dehydrogenase.|1.1.1.1|Alcohol dehydrogenase.|1.1.1.1|Alcohol dehydrogenase.|1.1.1.1|Alcohol dehydrogenase.|1.1.1.1|Alcohol dehydrogenase.|	1			0.15	0.1		0.05
c167	c167.a1	jgi|Trire2|5836|fgenesh1_pm.C_scaffold_30000038|GH2|Glycoside Hydrolase Family 2 protein|3.2.1.25|Beta-mannosidase.|	1			0.172413793103448	0.0344827586206897
c168	c168.a1	jgi|Trire2|119859|estExt_fgenesh5_pg.C_10726|GH18|Glycoside Hydrolase Family 18 protein|3.2.1.14|Chitinase.|	1			0.75	0.75
c169	c169.a1	jgi|Trire2|68347|e_gw1.24.244.1|GH18-CBM1|Glycoside Hydrolase Family 18 / Carbohydrate-Binding Module Family 1 protein|3.2.1.14|Chitinase.|	1			0.6	0.4
c169	c169.a2	jgi|Trire2|110317|fgenesh5_pg.C_scaffold_19000202|GH18-CBM1|Glycoside Hydrolase Family 18 / Carbohydrate-Binding Module Family 1 protein|3.2.1.14|Chitinase.|	1			0.5	0.25
c170	c170.a1	jgi|Trire2|69555|e_gw1.29.235.1|	1			1.5
c171	c171.a1	jgi|Trire2|76238|estExt_GeneWisePlus.C_50107|3.6.3.6|Proton-exporting ATPase.|	1			0.0625	0.03125		0.0625
c172	c172.a1	jgi|Trire2|53947|e_gw1.1.1053.1|	1			2	3
c173	c173.a1	jgi|Trire2|103033|fgenesh5_pg.C_scaffold_1000666|PL7_4|Polysaccharide Lyase Family 7 protein|	1			0.75	0.5
c174	c174.a1	jgi|Trire2|56920|e_gw1.3.290.1|3.4.11.10|Bacterial leucyl aminopeptidase.|	1			0.214285714285714	0.0714285714285714		0.0714285714285714
c175	c175.a1	jgi|Trire2|111138|fgenesh5_pg.C_scaffold_24000126|GH95|Glycoside Hydrolase Family 95 protein|	1			0.0357142857142857	0.0714285714285714	0.0357142857142857	0.0357142857142857
c176	c176.a1	jgi|Trire2|105808|fgenesh5_pg.C_scaffold_6000034|	1			0.125	0.25		0.25
c177	c177.a1	jgi|Trire2|39755|gw1.9.544.1|GH16|Glycoside Hydrolase Family 16 protein|	1			0.181818181818182	0.181818181818182		0.0909090909090909
c178	c178.a1	jgi|Trire2|123232|estExt_fgenesh5_pg.C_190084|GH12|Glycoside Hydrolase Family 12 protein|	1			0.333333333333333	1.33333333333333
c179	c179.a1	jgi|Trire2|58525|e_gw1.5.237.1|	1		0.0666666666666667		0.266666666666667
c180	c180.a1	jgi|Trire2|124256|estExt_fgenesh5_pg.C_420016|3.1.1.5|Lysophospholipase.|	1		0.05	0.1	0.1
c181	c181.a1	jgi|Trire2|74807|estExt_GeneWisePlus.C_20485|GH76|Glycoside Hydrolase Family 76 protein|	1			0.0909090909090909	0.272727272727273		0.0909090909090909
c182	c182.a1	jgi|Trire2|53567|e_gw1.1.494.1|	1			0.0625	0.1875		0.0625
c183	c183.a1	jgi|Trire2|71094|e_gw1.53.16.1|	1			0.5	0.166666666666667	0.166666666666667
c184	c184.a1	jgi|Trire2|27395|gw1.10.85.1|GH76|Glycoside Hydrolase Family 76 protein|	1			0.230769230769231	0.153846153846154
c185	c185.a1	jgi|Trire2|121534|estExt_fgenesh5_pg.C_80051|4.1.1.1|Pyruvate decarboxylase.|	1				0.16		0.04
c186	c186.a1	jgi|Trire2|73623|estExt_GeneWisePlus.C_10254|1.14.13.1|Salicylate 1-monooxygenase.|1.14.13.1|Salicylate 1-monooxygenase.|	1				0.157894736842105		0.0526315789473684
c187	c187.a1	jgi|Trire2|44504|estExt_Genewise1.C_11839|	1		0.0714285714285714		0.142857142857143	0.0714285714285714
c188	c188.a1	jgi|Trire2|105313|fgenesh5_pg.C_scaffold_5000098|3.2.1.3|Glucan 1.4-alpha-glucosidase.|	1			0.0263157894736842	0.0789473684210526
c189	c189.a1	jgi|Trire2|69189|e_gw1.28.265.1|PL20|Polysaccharide Lyase Family 20 protein|	1			0.0909090909090909	0.272727272727273
c190	c190.a1	jgi|Trire2|80659|estExt_GeneWisePlus.C_190326|AA3_3|Alcohol oxidase|1.1.99.1|Choline dehydrogenase.|	1			0.0666666666666667	0.0333333333333333		0.0333333333333333
c191	c191.a1	jgi|Trire2|120998|estExt_fgenesh5_pg.C_50325|3.4.16.5|Carboxypeptidase C.|	1			0.133333333333333	0.133333333333333
c192	c192.a1	jgi|Trire2|60949|e_gw1.8.724.1|	1			0.0666666666666667	0.133333333333333		0.0666666666666667
c193	c193.a1	jgi|Trire2|73102|kg2.C_scaffold_50000003|GH39|Glycoside Hydrolase Family 39 protein|	1			0.25	0.0833333333333333
c194	c194.a1	jgi|Trire2|68064|e_gw1.23.82.1|GH43|Glycoside Hydrolase Family 43 protein|	1			0.25	0.25
c195	c195.a1	jgi|Trire2|120911|estExt_fgenesh5_pg.C_50113|1.1.1.-|With NAD(+) or NADP(+) as acceptor.|1.1.1.-|With NAD(+) or NADP(+) as acceptor.|1.1.1.-|With NAD(+) or NADP(+) as acceptor.|1.1.1.-|With NAD(+) or NADP(+) as acceptor.|1.1.1.-|With NAD(+) or NADP(+) as acceptor.|1.1.1.-|With NAD(+) or NADP(+) as acceptor.|1.1.1.-|With NAD(+) or NADP(+) as acceptor.|1.1.1.-|With NAD(+) or NADP(+) as acceptor.|1.…	1			0.153846153846154	0.153846153846154
c196	c196.a1	jgi|Trire2|3716|fgenesh1_pm.C_scaffold_8000083|	1			0.333333333333333	0.333333333333333
c197	c197.a1	jgi|Trire2|69811|e_gw1.30.32.1|2.3.2.2|Gamma-glutamyltransferase.|2.3.2.2|Gamma-glutamyltransferase.|2.3.2.2|Gamma-glutamyltransferase.|2.3.2.2|Gamma-glutamyltransferase.|2.3.2.2|Gamma-glutamyltransferase.|	1			0.111111111111111	0.111111111111111
c198	c198.a1	jgi|Trire2|58117|e_gw1.4.695.1|GH89|Glycoside Hydrolase Family 89 protein|3.2.1.50|Alpha-N-acetylglucosaminidase.|	1			0.115384615384615	0.0384615384615385
c199	c199.a1	jgi|Trire2|121820|estExt_fgenesh5_pg.C_90192|2.1.1.14|5-methyltetrahydropteroyltriglutamate--homocysteine S-methyltransferase.|	1			0.0263157894736842	0.0526315789473684
c200	c200.a1	jgi|Trire2|122717|estExt_fgenesh5_pg.C_140156|	2				0.105263157894737
c201	c201.a1	jgi|Trire2|49193|estExt_Genewise1.C_120230|GH17|Glycoside Hydrolase Family 17 protein|3.2.1.58|Glucan 1.3-beta-glucosidase.|	1			0.153846153846154	0.0769230769230769
c202	c202.a1	jgi|Trire2|21659|estExt_fgenesh1_pm.C_30197|3.4.14.4|Dipeptidyl-peptidase III.|	1				0.0588235294117647		0.0294117647058824
c203	c203.a1	jgi|Trire2|82141|estExt_GeneWisePlus.C_310101|3.4.-.-|Acting on peptide bonds (peptide hydrolases).|3.4.-.-|Acting on peptide bonds (peptide hydrolases).|	1			0.0740740740740741	0.037037037037037
c204	c204.a1	jgi|Trire2|53961|e_gw1.1.1743.1|3.4.23.18|Aspergillopepsin I.|	1			0.111111111111111	0.222222222222222
c205	c205.a1	jgi|Trire2|121814|estExt_fgenesh5_pg.C_90182|2.6.1.44|Alanine--glyoxylate aminotransferase.|2.6.1.44|Alanine--glyoxylate aminotransferase.|	1				0.2		0.1
c206	c206.a1	jgi|Trire2|74198|estExt_GeneWisePlus.C_11310|GH92|Glycoside Hydrolase Family 92 protein|	1			0.0689655172413793	0.0344827586206897
c207	c207.a1	jgi|Trire2|63526|e_gw1.12.567.1|	1			0.333333333333333	0.166666666666667
c208	c208.a1	jgi|Trire2|22564|estExt_fgenesh1_pm.C_120022|	1			1	0.5
c209	c209.a1	jgi|Trire2|109907|fgenesh5_pg.C_scaffold_18000004|	1			0.2	0.4
c210	c210.a1	jgi|Trire2|66608|e_gw1.19.218.1|3.4.14.-|Dipeptidyl-peptidases and tripeptidyl-peptidases.|	1			0.0263157894736842	0.0526315789473684
c211	c211.a1	jgi|Trire2|76887|estExt_GeneWisePlus.C_60528|3.4.23.24|Candidapepsin.|	1			0.1	0.2
c212	c212.a1	jgi|Trire2|120229|estExt_fgenesh5_pg.C_20480|GH10|Glycoside Hydrolase Family 10 protein|	1				0.181818181818182		0.0909090909090909
c213	c213.a1	jgi|Trire2|76266|estExt_GeneWisePlus.C_50155|CBM18-GH16|Carbohydrate-Binding Module Family 18 / Glycoside Hydrolase Family 16 protein|3.2.1.73|Licheninase.|	1			0.0909090909090909	0.181818181818182
c214	c214.a1	jgi|Trire2|44366|estExt_Genewise1.C_11595|	1			0.0714285714285714	0.142857142857143
c215	c215.a1	jgi|Trire2|62166|e_gw1.10.402.1|GH2|Glycoside Hydrolase Family 2 protein|3.2.1.25|Beta-mannosidase.|	1				0.0731707317073171
c216	c216.a1	jgi|Trire2|27259|gw1.30.22.1|GH27|Glycoside Hydrolase Family 27 protein|3.2.1.22|Alpha-galactosidase.|3.2.1.22|Alpha-galactosidase.|3.2.1.22|Alpha-galactosidase.|3.2.1.22|Alpha-galactosidase.|	1				0.2		0.1
c217	c217.a1	jgi|Trire2|72704|kg2.C_scaffold_30000003|GH27|Glycoside Hydrolase Family 27 protein|	1			0.125	0.0625
c218	c218.a1	jgi|Trire2|60422|e_gw1.7.813.1|	1			0.111111111111111	0.222222222222222
c219	c219.a1	jgi|Trire2|43873|estExt_Genewise1.C_10578|GH18|Glycoside Hydrolase Family 18 protein|3.2.1.14|Chitinase.|	1			0.333333333333333	0.166666666666667
c220	c220.a1	jgi|Trire2|82616|estExt_GeneWisePlus.C_440029|GH5_5|Glycoside Hydrolase Family 5 protein|	1			0.153846153846154	0.0769230769230769
c221	c221.a1	jgi|Trire2|67844|e_gw1.23.54.1|GH76|Glycoside Hydrolase Family 76 protein|3.2.1.101|Mannan endo-1.6-beta-mannosidase.|	1			0.0625	0.125
c222	c222.a1	jgi|Trire2|121789|estExt_fgenesh5_pg.C_90132|5.3.1.1|Triosephosphate isomerase.|5.3.1.1|Triosephosphate isomerase.|5.3.1.1|Triosephosphate isomerase.|5.3.1.1|Triosephosphate isomerase.|5.3.1.1|Triosephosphate isomerase.|	1			0.0666666666666667	0.0666666666666667
c223	c223.a1	jgi|Trire2|21836|estExt_fgenesh1_pm.C_40245|5.4.2.2|Phosphoglucomutase.|5.4.2.2|Phosphoglucomutase.|5.4.2.2|Phosphoglucomutase.|5.4.2.2|Phosphoglucomutase.|5.4.2.2|Phosphoglucomutase.|5.4.2.2|Phosphoglucomutase.|5.4.2.2|Phosphoglucomutase.|	1		0.0454545454545455		0.0454545454545455
c224	c224.a1	jgi|Trire2|124210|estExt_fgenesh5_pg.C_390017|	1		1
c225	c225.a1	jgi|Trire2|123071|estExt_fgenesh5_pg.C_170219|	1		0.0476190476190476		0.0476190476190476
c226	c226.a1	jgi|Trire2|70341|e_gw1.35.94.1|GH75|Glycoside Hydrolase Family 75 protein|	1				0.285714285714286
c227	c227.a1	jgi|Trire2|50593|estExt_Genewise1.C_180099|3.1.3.5|5'-nucleotidase.|3.1.3.5|5'-nucleotidase.|3.1.3.5|5'-nucleotidase.|	1				0.133333333333333
c228	c228.a1	jgi|Trire2|45085|estExt_Genewise1.C_20918|	1				0.4
c229	c229.a1	jgi|Trire2|61127|e_gw1.8.603.1|3.4.16.-|Serine-type carboxypeptidases.|	1			0.0833333333333333	0.0833333333333333
c230	c230.a1	jgi|Trire2|74725|estExt_GeneWisePlus.C_20334|2.6.1.1|Aspartate aminotransferase.|2.6.1.1|Aspartate aminotransferase.|2.6.1.1|Aspartate aminotransferase.|2.6.1.1|Aspartate aminotransferase.|2.6.1.1|Aspartate aminotransferase.|2.6.1.1|Aspartate aminotransferase.|2.6.1.1|Aspartate aminotransferase.|2.6.1.1|Aspartate aminotransferase.|2.6.1.1|Aspartate aminotransferase.|	1				0.133333333333333
c231	c231.a1	jgi|Trire2|58387|e_gw1.5.683.1|6.2.1.4|Succinate--CoA ligase (GDP-forming).|6.2.1.4|Succinate--CoA ligase (GDP-forming).|	1				0.0588235294117647		0.0588235294117647
c232	c232.a1	jgi|Trire2|123631|estExt_fgenesh5_pg.C_240084|1.5.1.10|Saccharopine dehydrogenase (NADP+. L-glutamate forming).|	1				0.1
c233	c233.a1	jgi|Trire2|5807|fgenesh1_pm.C_scaffold_30000009|GH95|Glycoside Hydrolase Family 95 protein|	1				0.0869565217391304
c234	c234.a1	jgi|Trire2|55362|e_gw1.2.175.1|	1		0.0476190476190476		0.0476190476190476
c235	c235.a1	jgi|Trire2|121856|estExt_fgenesh5_pg.C_90250|1.13.11.27|4-hydroxyphenylpyruvate dioxygenase.|1.13.11.27|4-hydroxyphenylpyruvate dioxygenase.|	1				0.117647058823529
c236	c236.a1	jgi|Trire2|77093|estExt_GeneWisePlus.C_70315|3.1.4.12|Sphingomyelin phosphodiesterase.|	1			0.111111111111111
c237	c237.a1	jgi|Trire2|81541|estExt_GeneWisePlus.C_250200|GH128|Glycoside Hydrolase Family 128 protein|	1			0.125	0.125
c238	c238.a1	jgi|Trire2|78713|estExt_GeneWisePlus.C_110315|GH72|Glycoside Hydrolase Family 72 protein|	1			0.0714285714285714	0.0714285714285714
c239	c239.a1	jgi|Trire2|124043|estExt_fgenesh5_pg.C_310058|GH18-CBM1|Glycoside Hydrolase Family 18 / Carbohydrate-Binding Module Family 1 protein|3.2.1.14|Chitinase.|	1			0.5

## Sheet: Compare spectra Pbr985 LTQ-Orbi
Proteomics complementary data for Pbr985. Number of identified spectra in each condition (Maltose + Lignin and Lignin) at days 7 and 14 following the LTQ-Orbitrap analysis methods.
Group ID	Sub-group ID	Protein Description	Number of proteins	Day3_Maltose+Lignin	Day3_Lignin	Day7_Maltose+Lignin	Day7_Lignin	Day14_Maltose+Lignin	Day14_Lignin
a1	a1.a1	jgi|Polbr1|224137|CE224136_76555|AA1_1|Laccase|IPR001117|Multicopper oxidase, type 1|IPR011706|Multicopper oxidase, type 2|IPR011707|Multicopper oxidase, type 3|IPR002355|Multicopper oxidase, copper-binding site|IPR008972|Cupredoxin|	1	4	7	31	13	18	16
a1	a1.a2	jgi|Polbr1|657909|CE657908_4567|AA1_1|Laccase|IPR001117|Multicopper oxidase, type 1|IPR011706|Multicopper oxidase, type 2|IPR011707|Multicopper oxidase, type 3|IPR002355|Multicopper oxidase, copper-binding site|IPR008972|Cupredoxin|	1	6	11	14	4	5	1
a2	a2.a1	jgi|Polbr1|1388977|estExt_Genewise1.C_680026|AA7|Glucooligosaccharide oxidase|IPR006094|FAD linked oxidase, N-terminal|IPR012951|Berberine/berberine-like|IPR016166|FAD-binding, type 2|	1	10	13	34	18	23	12
a3	a3.a1	jgi|Polbr1|1500721|MIX9437_110063_81|GH92|Glycoside Hydrolase Family 92 protein|IPR012939|Glycosyl hydrolase 92|IPR005887|Alpha-1,2-mannosidase, putative|IPR008928|Six-hairpin glycosidase-like|	1	6	23	17	9	11	8
a3	a3.a2	jgi|Polbr1|1400602|fgenesh1_kg.13_#_147_#_Locus1500v1rpkm106.56|GH92|Glycoside Hydrolase Family 92 protein|IPR012939|Glycosyl hydrolase 92|IPR008928|Six-hairpin glycosidase-like|IPR016040|NAD(P)-binding|	1	0	0	2	0	0	1
a4	a4.a1	jgi|Polbr1|1349191|e_gw1.22.85.1|GH15-CBM20|Glycoside Hydrolase Family 15 / Carbohydrate-Binding Module Family 20 protein|IPR002044|Glycoside hydrolase, carbohydrate-binding|IPR000165|Glycoside hydrolase, family 15|IPR002044|Glycoside hydrolase, carbohydrate-binding|IPR011613|Glycoside hydrolase 15-related|IPR008291|Glucan 1,4-alpha-glucosidase, starch-binding|IPR002044|Glycoside hydrolase, carbo…	1	3	5	24	7	12	7
a5	a5.a1	jgi|Polbr1|1488971|gm1.12552_g|GH55|Glycoside Hydrolase Family 55 protein|IPR011050|Pectin lyase fold/virulence factor|	1	2	8	17	9	14	7
a6	a6.a1	jgi|Polbr1|346399|CE346398_94425|	1	2	11	8	2	4	3
a6	a6.a2	jgi|Polbr1|1347831|e_gw1.18.256.1|	1	4	9	9	2	3	1
a7	a7.a1	jgi|Polbr1|1338184|e_gw1.3.371.1|GH27|Glycoside Hydrolase Family 27 protein|IPR000111|Glycoside hydrolase, clan GH-D|IPR002241|Glycoside hydrolase, family 27|IPR000111|Glycoside hydrolase, clan GH-D|IPR000111|Glycoside hydrolase, clan GH-D|IPR017853|Glycoside hydrolase, catalytic core|	1	4	14	8	6	10	3
a8	a8.a1	jgi|Polbr1|1401868|fgenesh1_kg.18_#_119_#_Locus174v1rpkm732.12|	1	3	9	6	12	6	8
a9	a9.a1	jgi|Polbr1|748989|CE748988_52067|IPR014870|Region of unknown function DUF1793|IPR008928|Six-hairpin glycosidase-like|	1	0	1	5	15	8	15
b10	b10.a1	jgi|Polbr1|1407721|fgenesh1_kg.56_#_34_#_Locus1356v1rpkm116.62|GH76|Glycoside Hydrolase Family 76 protein|IPR005198|Glycoside hydrolase, family 76|IPR008928|Six-hairpin glycosidase-like|	1	0	3	19	6	10	3
b11	b11.a1	jgi|Polbr1|1408208|fgenesh1_kg.61_#_22_#_Locus7163v1rpkm15.19|IPR000868|Isochorismatase hydrolase|IPR000868|Isochorismatase hydrolase|	1	1	7	13	7	8	2
b12	b12.a1	jgi|Polbr1|1351752|e_gw1.31.257.1|GH37|Glycoside Hydrolase Family 37 protein|IPR001661|Glycoside hydrolase, family 37|IPR001661|Glycoside hydrolase, family 37|IPR001661|Glycoside hydrolase, family 37|IPR001661|Glycoside hydrolase, family 37|IPR008928|Six-hairpin glycosidase-like|	1	4	15	8	3	0	3
b13	b13.a1	jgi|Polbr1|1420175|fgenesh1_pg.49_#_18|AA5_1|Copper radical oxidase|IPR009880|Glyoxal oxidase, N-terminal|IPR015202|Region of unknown function DUF1929|IPR011043|Galactose oxidase/kelch, beta-propeller|IPR014756|Immunoglobulin E-set|	1	2	7	11	3	6	3
b14	b14.a1	jgi|Polbr1|1364383|e_gw1.130.38.1|IPR001461|Peptidase A1|IPR001461|Peptidase A1|IPR001969|Peptidase aspartic, active site|IPR009007|Peptidase aspartic, catalytic|	1	2	8	4	9	5	4
b15	b15.a1	jgi|Polbr1|1479303|gm1.2884_g|GH7|Glycoside Hydrolase Family 7 protein|IPR001722|Glycoside hydrolase, family 7|IPR001722|Glycoside hydrolase, family 7|IPR001722|Glycoside hydrolase, family 7|IPR008985|Concanavalin A-like lectin/glucanase|	1	0	0	6	2	6	6
b15	b15.a2	jgi|Polbr1|355477|CE355476_2182|GH7|Glycoside Hydrolase Family 7 protein|IPR001722|Glycoside hydrolase, family 7|IPR001722|Glycoside hydrolase, family 7|IPR001722|Glycoside hydrolase, family 7|IPR008985|Concanavalin A-like lectin/glucanase|	1	0	0	4	2	4	4
b16	b16.a1	jgi|Polbr1|1400569|fgenesh1_kg.13_#_114_#_Locus4315v3rpkm0.36_PRE|IPR002018|Carboxylesterase, type B|IPR002018|Carboxylesterase, type B|	1	0	4	12	0	9	1
b17	b17.a1	jgi|Polbr1|1559509|estExt_Genemark1.C_680003|	1	1	7	3	2	4	3
b17	b17.a2	jgi|Polbr1|1421205|fgenesh1_pg.68_#_24|	1	0	6	1	0	1	1
b18	b18.a1	jgi|Polbr1|1328989|gw1.85.54.1|	1	3	11	2	4	0	2
b19	b19.a1	jgi|Polbr1|1447784|estExt_Genewise1Plus.C_970077|GH28|Glycoside Hydrolase Family 28 protein|IPR000743|Glycoside hydrolase, family 28|IPR006626|Parallel beta-helix repeat|IPR000743|Glycoside hydrolase, family 28|IPR011050|Pectin lyase fold/virulence factor|	1	0	0	9	2	7	3
b20	b20.a1	jgi|Polbr1|1416855|fgenesh1_pg.13_#_122|IPR001461|Peptidase A1|IPR001461|Peptidase A1|IPR001969|Peptidase aspartic, active site|IPR009007|Peptidase aspartic, catalytic|	1	2	6	2	5	3	2
b21	b21.a1	jgi|Polbr1|775754|CE775753_35734|GH31|Glycoside Hydrolase Family 31 protein|IPR000322|Glycoside hydrolase, family 31|IPR000322|Glycoside hydrolase, family 31|IPR017853|Glycoside hydrolase, catalytic core|	1	0	0	6	3	6	4
b22	b22.a1	jgi|Polbr1|899854|CE899853_5672|IPR006094|FAD linked oxidase, N-terminal|IPR012951|Berberine/berberine-like|IPR016166|FAD-binding, type 2|	1	1	12	2	3	0	1
b23	b23.a1	jgi|Polbr1|1400708|fgenesh1_kg.13_#_253_#_Locus10676v1rpkm3.50|IPR001563|Peptidase S10, serine carboxypeptidase|IPR001563|Peptidase S10, serine carboxypeptidase|IPR001563|Peptidase S10, serine carboxypeptidase|IPR001563|Peptidase S10, serine carboxypeptidase|	1	2	5	4	2	4	2
b24	b24.a1	jgi|Polbr1|1437352|estExt_Genewise1Plus.C_210386|GH2|Glycoside Hydrolase Family 2 protein|IPR006102|Glycoside hydrolase family 2, immunoglobulin-like beta-sandwich|IPR008979|Galactose-binding like|IPR017853|Glycoside hydrolase, catalytic core|	1	0	8	4	1	1	1
b24	b24.a2	jgi|Polbr1|1437365|estExt_Genewise1Plus.C_210399|GH2|Glycoside Hydrolase Family 2 protein|IPR006102|Glycoside hydrolase family 2, immunoglobulin-like beta-sandwich|IPR008979|Galactose-binding like|IPR017853|Glycoside hydrolase, catalytic core|	1	0	2	3	2	2	1
b25	b25.a1	jgi|Polbr1|1347474|e_gw1.18.442.1|GH5_9|Glycoside Hydrolase Family 5 protein|IPR001547|Glycoside hydrolase, family 5|IPR017853|Glycoside hydrolase, catalytic core|	1	0	2	5	5	5	0
b26	b26.a1	jgi|Polbr1|1544098|MIX52814_7719_36|IPR001563|Peptidase S10, serine carboxypeptidase|IPR001563|Peptidase S10, serine carboxypeptidase|IPR001563|Peptidase S10, serine carboxypeptidase|IPR001563|Peptidase S10, serine carboxypeptidase|IPR001563|Peptidase S10, serine carboxypeptidase|	1	0	3	4	3	4	2
b27	b27.a1	jgi|Polbr1|1406746|fgenesh1_kg.47_#_65_#_Locus5032v1rpkm29.17|IPR015366|Peptidase S53, propeptide|IPR000209|Peptidase S8 and S53, subtilisin, kexin, sedolisin|IPR009020|Proteinase inhibitor, propeptide|	1	1	4	4	1	4	1
b27	b27.a2	jgi|Polbr1|1406960|fgenesh1_kg.49_#_51_#_Locus3221v1rpkm50.04|IPR015366|Peptidase S53, propeptide|IPR000209|Peptidase S8 and S53, subtilisin, kexin, sedolisin|IPR009020|Proteinase inhibitor, propeptide|	1	0	1	2	0	3	0
b28	b28.a1	jgi|Polbr1|1490858|gm1.14439_g|IPR001563|Peptidase S10, serine carboxypeptidase|IPR001563|Peptidase S10, serine carboxypeptidase|IPR001563|Peptidase S10, serine carboxypeptidase|IPR001563|Peptidase S10, serine carboxypeptidase|	1	0	0	5	4	3	4
b29	b29.a1	jgi|Polbr1|165618|CE165617_2833|IPR001938|Thaumatin, pathogenesis-related|IPR001938|Thaumatin, pathogenesis-related|IPR001938|Thaumatin, pathogenesis-related|IPR001938|Thaumatin, pathogenesis-related|IPR001938|Thaumatin, pathogenesis-related|IPR001938|Thaumatin, pathogenesis-related|	1	0	0	6	4	4	2
b30	b30.a1	jgi|Polbr1|615361|CE615360_11270|GH3|Glycoside Hydrolase Family 3 protein|IPR001764|Glycoside hydrolase, family 3, N-terminal|IPR001764|Glycoside hydrolase, family 3, N-terminal|IPR002772|Glycoside hydrolase, family 3, C-terminal|IPR017853|Glycoside hydrolase, catalytic core|IPR002772|Glycoside hydrolase, family 3, C-terminal|	1	0	2	1	2	5	5
b31	b31.a1	jgi|Polbr1|1487358|gm1.10939_g|GH35|Glycoside Hydrolase Family 35 protein|IPR001944|Glycoside hydrolase, family 35|IPR001944|Glycoside hydrolase, family 35|IPR017853|Glycoside hydrolase, catalytic core|	1	0	0	0	3	6	4
b31	b31.a2	jgi|Polbr1|1487357|gm1.10938_g|GH35|Glycoside Hydrolase Family 35 protein|IPR001944|Glycoside hydrolase, family 35|IPR001944|Glycoside hydrolase, family 35|IPR017853|Glycoside hydrolase, catalytic core|	1	0	0	1	0	2	0
b32	b32.a1	jgi|Polbr1|1337234|e_gw1.3.310.1|PL8_4|Polysaccharide Lyase Family 8 protein|IPR003159|Polysaccharide lyase family 8, central|IPR008929|Chondroitin AC/alginate lyase|IPR011071|Polysaccharide lyase family 8-like, C-terminal|IPR011013|Glycoside hydrolase-type carbohydrate-binding|	1	0	7	0	4	0	2
b33	b33.a1	jgi|Polbr1|977992|CE977991_41569|	1	2	2	2	3	2	2
b34	b34.a1	jgi|Polbr1|1434324|estExt_Genewise1Plus.C_130135|IPR002018|Carboxylesterase, type B|IPR002018|Carboxylesterase, type B|	1	0	5	3	3	2	0
b35	b35.a1	jgi|Polbr1|1417405|fgenesh1_pg.17_#_102|AA1_1|Laccase|IPR001117|Multicopper oxidase, type 1|IPR011706|Multicopper oxidase, type 2|IPR011707|Multicopper oxidase, type 3|IPR002355|Multicopper oxidase, copper-binding site|IPR002355|Multicopper oxidase, copper-binding site|IPR008972|Cupredoxin|	1	1	1	4	1	4	1
b36	b36.a1	jgi|Polbr1|1484581|gm1.8162_g|GH16|Glycoside Hydrolase Family 16 protein|IPR008985|Concanavalin A-like lectin/glucanase|	1	2	3	2	2	1	1
b37	b37.a1	jgi|Polbr1|1144614|CE1144613_73762|IPR015366|Peptidase S53, propeptide|IPR000209|Peptidase S8 and S53, subtilisin, kexin, sedolisin|IPR000209|Peptidase S8 and S53, subtilisin, kexin, sedolisin|IPR009020|Proteinase inhibitor, propeptide|	1	0	0	2	3	3	3
b38	b38.a1	jgi|Polbr1|1481521|gm1.5102_g|IPR001563|Peptidase S10, serine carboxypeptidase|IPR001563|Peptidase S10, serine carboxypeptidase|IPR001563|Peptidase S10, serine carboxypeptidase|IPR001563|Peptidase S10, serine carboxypeptidase|	1	1	1	3	1	2	2
b39	b39.a1	jgi|Polbr1|1362263|e_gw1.100.3.1|AA5_1|Copper radical oxidase|IPR009880|Glyoxal oxidase, N-terminal|IPR015202|Region of unknown function DUF1929|IPR011043|Galactose oxidase/kelch, beta-propeller|IPR014756|Immunoglobulin E-set|	1	1	4	2	2	1	0
b40	b40.a1	jgi|Polbr1|530269|CE530268_2175|	1	0	0	4	0	5	0
b41	b41.a1	jgi|Polbr1|1375508|estExt_Genewise1.C_9_t10102|IPR000639|Epoxide hydrolase-like|IPR000073|Alpha/beta hydrolase fold-1|	1	0	0	4	1	4	0
b42	b42.a1	jgi|Polbr1|1411725|fgenesh1_kg.121_#_26_#_Locus590v1rpkm253.02|IPR015366|Peptidase S53, propeptide|IPR000194|ATPase, F1/V1/A1 complex, alpha/beta subunit, nucleotide-binding|IPR003439|ABC transporter-like|IPR000209|Peptidase S8 and S53, subtilisin, kexin, sedolisin|IPR009020|Proteinase inhibitor, propeptide|	1	0	3	5	0	1	0
b43	b43.a1	jgi|Polbr1|1356067|e_gw1.49.44.1|GH95|Glycoside Hydrolase Family 95 protein|IPR016518|Uncharacterised conserved protein UCP007663|IPR008928|Six-hairpin glycosidase-like|	1	1	3	1	0	2	1
b44	b44.a1	jgi|Polbr1|1534843|MIX43559_7181_87|	1	0	0	2	3	2	1
b45	b45.a1	jgi|Polbr1|1422305|fgenesh1_pg.98_#_18|IPR002018|Carboxylesterase, type B|IPR002018|Carboxylesterase, type B|	1	0	0	2	1	2	1
b45	b45.a2	jgi|Polbr1|1260852|CE1260851_1225|	1	0	0	2	0	2	0
b46	b46.a1	jgi|Polbr1|1427816|estExt_Genewise1Plus.C_3_t20484|GH72-CBM43|Glycoside Hydrolase Family 72 / Carbohydrate-Binding Module Family 43 protein|IPR004886|Glycolipid anchored surface protein GAS1|IPR012946|X8|IPR012946|X8|IPR001547|Glycoside hydrolase, family 5|IPR000595|Cyclic nucleotide-binding|IPR017853|Glycoside hydrolase, catalytic core|	1	1	6	1	0	0	0
b47	b47.a1	jgi|Polbr1|1338011|e_gw1.3.813.1|CE4|Carbohydrate Esterase Family 4 protein|IPR002509|Polysaccharide deacetylase|IPR011330|Glycoside hydrolase/deacetylase, beta/alpha-barrel|	1	1	1	3	2	0	1
b48	b48.a1	jgi|Polbr1|1348579|e_gw1.20.24.1|AA5_1|Copper radical oxidase|IPR002889|Carbohydrate-binding WSC|IPR009880|Glyoxal oxidase, N-terminal|IPR015202|Region of unknown function DUF1929|IPR013994|Carbohydrate-binding WSC, subgroup|IPR002889|Carbohydrate-binding WSC|IPR011043|Galactose oxidase/kelch, beta-propeller|IPR014756|Immunoglobulin E-set|	1	0	2	2	0	4	0
b49	b49.a1	jgi|Polbr1|1400420|fgenesh1_kg.12_#_246_#_Locus1381v1rpkm115.15|IPR007312|Phosphoesterase|	1	1	3	2	1	1	0
b50	b50.a1	jgi|Polbr1|1339450|e_gw1.5.937.1|IPR001563|Peptidase S10, serine carboxypeptidase|IPR001563|Peptidase S10, serine carboxypeptidase|IPR001563|Peptidase S10, serine carboxypeptidase|	1	0	1	3	0	3	0
b51	b51.a1	jgi|Polbr1|677637|CE677636_38414|IPR015366|Peptidase S53, propeptide|IPR000209|Peptidase S8 and S53, subtilisin, kexin, sedolisin|IPR000209|Peptidase S8 and S53, subtilisin, kexin, sedolisin|IPR009020|Proteinase inhibitor, propeptide|	1	0	1	2	2	1	1
b52	b52.a1	jgi|Polbr1|1460895|estExt_fgenesh1_pm.C_40005|IPR001461|Peptidase A1|IPR001461|Peptidase A1|IPR001969|Peptidase aspartic, active site|IPR009007|Peptidase aspartic, catalytic|	1	0	2	0	2	2	1
b53	b53.a1	jgi|Polbr1|1354493|e_gw1.42.177.1|IPR002018|Carboxylesterase, type B|IPR002018|Carboxylesterase, type B|IPR002018|Carboxylesterase, type B|	1	0	0	1	1	1	3
b54	b54.a1	jgi|Polbr1|1405628|fgenesh1_kg.39_#_11_#_Locus8v1rpkm5021.64|IPR000173|Glyceraldehyde 3-phosphate dehydrogenase|IPR000173|Glyceraldehyde 3-phosphate dehydrogenase|IPR000173|Glyceraldehyde 3-phosphate dehydrogenase|IPR000173|Glyceraldehyde 3-phosphate dehydrogenase|IPR006424|Glyceraldehyde-3-phosphate dehydrogenase, type I|IPR000173|Glyceraldehyde 3-phosphate dehydrogenase|IPR016040|NAD(P)-binding|	1	0	3	1	1	1	0
b55	b55.a1	jgi|Polbr1|1338413|e_gw1.3.932.1|GH16|Glycoside Hydrolase Family 16 protein|IPR008985|Concanavalin A-like lectin/glucanase|	1	0	0	0	2	0	3
b56	b56.a1	jgi|Polbr1|1457484|fgenesh1_pm.56_#_11|GH16|Glycoside Hydrolase Family 16 protein|IPR008985|Concanavalin A-like lectin/glucanase|	1	0	0	1	1	1	2
b57	b57.a1	jgi|Polbr1|1346110|e_gw1.14.578.1|IPR001951|Histone H4|IPR001951|Histone H4|IPR007125|Histone core|IPR001951|Histone H4|IPR001951|Histone H4|IPR009072|Histone-fold|	5	0	0	0	1	0	4
b58	b58.a1	jgi|Polbr1|1399305|fgenesh1_kg.9_#_154_#_Locus582v1rpkm254.86|	1	0	2	0	2	0	1
b59	b59.a1	jgi|Polbr1|1399901|fgenesh1_kg.11_#_7_#_Locus3398v1rpkm47.19|GH27|Glycoside Hydrolase Family 27 protein|IPR000111|Glycoside hydrolase, clan GH-D|IPR002241|Glycoside hydrolase, family 27|IPR000111|Glycoside hydrolase, clan GH-D|IPR017853|Glycoside hydrolase, catalytic core|	1	0	1	2	1	1	0
b60	b60.a1	jgi|Polbr1|835216|CE835215_1786|CE8|Carbohydrate Esterase Family 8 protein|IPR000070|Pectinesterase, catalytic|IPR011050|Pectin lyase fold/virulence factor|	1	0	0	2	0	2	0
b61	b61.a1	jgi|Polbr1|1397005|fgenesh1_kg.4_#_331_#_Locus253v1rpkm562.78|IPR001461|Peptidase A1|IPR001461|Peptidase A1|IPR001969|Peptidase aspartic, active site|IPR009007|Peptidase aspartic, catalytic|	1	0	0	0	3	0	1
b62	b62.a1	jgi|Polbr1|1395134|fgenesh1_kg.1_#_494_#_Locus1806v1rpkm89.95|IPR006045|Cupin 1|IPR013096|Cupin 2, conserved barrel|IPR017774|Bicupin, oxalate decarboxylase/oxidase|IPR000276|GPCR, rhodopsin-like|IPR011051|Cupin, RmlC-type|	1	0	0	2	0	2	0
b63	b63.a1	jgi|Polbr1|1352774|e_gw1.35.11.1|IPR012878|Protein of unknown function DUF1680|	1	0	0	3	1	0	0
b64	b64.a1	jgi|Polbr1|497798|CE497797_2765|IPR005135|Endonuclease/exonuclease/phosphatase|IPR005135|Endonuclease/exonuclease/phosphatase|	1	0	0	2	1	0	1
b65	b65.a1	jgi|Polbr1|1478588|gm1.2169_g|IPR001461|Peptidase A1|IPR001461|Peptidase A1|IPR001969|Peptidase aspartic, active site|IPR001220|Legume lectin, beta domain|IPR009007|Peptidase aspartic, catalytic|	1	0	0	2	0	2	0
b66	b66.a1	jgi|Polbr1|1413263|fgenesh1_kg.230_#_2_#_Locus2088v1rpkm78.33|IPR005135|Endonuclease/exonuclease/phosphatase|IPR005135|Endonuclease/exonuclease/phosphatase|	1	0	0	1	1	2	0
b67	b67.a1	jgi|Polbr1|1456450|fgenesh1_pm.35_#_72|GH18|Glycoside Hydrolase Family 18 protein|IPR001579|Glycoside hydrolase, chitinase active site|IPR017853|Glycoside hydrolase, catalytic core|	3	0	0	4	0	0	0
b68	b68.a1	jgi|Polbr1|1345918|e_gw1.14.167.1|IPR001568|Ribonuclease T2|IPR001568|Ribonuclease T2|IPR001568|Ribonuclease T2|IPR001568|Ribonuclease T2|	1	0	1	2	0	1	0
b69	b69.a1	jgi|Polbr1|1495871|MIX4587_10656_36|GH30_3|Glycoside Hydrolase Family 30 protein|IPR001139|Glycoside hydrolase, family 30|IPR008972|Cupredoxin|IPR017853|Glycoside hydrolase, catalytic core|	1	0	0	2	0	2	0
b70	b70.a1	jgi|Polbr1|1346223|e_gw1.14.450.1|IPR001384|Peptidase M35, deuterolysin|	1	0	0	0	2	1	0
b71	b71.a1	jgi|Polbr1|1410461|fgenesh1_kg.92_#_47_#_Locus864v1rpkm175.83|CBM18-GH16|Carbohydrate-Binding Module Family 18 / Glycoside Hydrolase Family 16 protein|IPR000757|Glycoside hydrolase, family 16|IPR001002|Chitin-binding, type 1|IPR008985|Concanavalin A-like lectin/glucanase|	1	0	1	1	0	1	0
b72	b72.a1	jgi|Polbr1|1399130|fgenesh1_kg.8_#_433_#_Locus7121v1rpkm15.40|GH71|Glycoside Hydrolase Family 71 protein|IPR005197|Glycoside hydrolase, family 71|IPR005197|Glycoside hydrolase, family 71|	1	0	0	1	2	0	0
b73	b73.a1	jgi|Polbr1|1346712|e_gw1.16.453.1|IPR005198|Glycoside hydrolase, family 76|IPR008928|Six-hairpin glycosidase-like|	1	0	3	0	0	0	0
b74	b74.a1	jgi|Polbr1|1362054|e_gw1.97.19.1|IPR002018|Carboxylesterase, type B|IPR002018|Carboxylesterase, type B|	1	0	0	0	1	0	2
b75	b75.a1	jgi|Polbr1|1483812|gm1.7393_g|IPR008183|Aldose 1-epimerase|IPR011013|Glycoside hydrolase-type carbohydrate-binding|	1	0	0	0	1	0	2
b76	b76.a1	jgi|Polbr1|1357935|e_gw1.60.61.1|IPR001842|Peptidase M36, fungalysin|IPR001842|Peptidase M36, fungalysin|IPR011096|Propeptide, peptidase M4 and M36|IPR001425|Rhodopsin, bacterial|	1	0	0	0	1	0	2
b77	b77.a1	jgi|Polbr1|397425|CE397424_1271|GH93|Glycoside Hydrolase Family 93 protein|IPR002860|BNR repeat|IPR011040|Neuraminidase|	1	0	0	0	3	0	0
b78	b78.a1	jgi|Polbr1|1349136|e_gw1.22.281.1|	1	0	0	0	0	3	0
b79	b79.a1	jgi|Polbr1|1352206|e_gw1.33.115.1|GH79|Glycoside Hydrolase Family 79 protein|	1	0	0	0	0	3	0
b80	b80.a1	jgi|Polbr1|1401242|fgenesh1_kg.15_#_223_#_Locus4046v3rpkm20.75|IPR011024|Gamma-crystallin related|	1	0	1	0	2	0	0
b81	b81.a1	jgi|Polbr1|1348020|e_gw1.19.318.1|IPR000164|Histone H3|IPR007125|Histone core|IPR000164|Histone H3|IPR000164|Histone H3|IPR000164|Histone H3|IPR009072|Histone-fold|	4	0	0	0	0	0	2
b82	b82.a1	jgi|Polbr1|1551444|estExt_Genemark1.C_30149|IPR000795|Protein synthesis factor, GTP-binding|IPR000795|Protein synthesis factor, GTP-binding|IPR004160|Translation elongation factor EFTu/EF1A, C-terminal|IPR004161|Translation elongation factor EFTu/EF1A, domain 2|IPR004539|Translation elongation factor EF1A, eukaryotic and archaeal|IPR000795|Protein synthesis factor, GTP-binding|IPR009000|Translati…	1	0	0	0	2	0	0
b83	b83.a1	jgi|Polbr1|1445296|estExt_Genewise1Plus.C_650102|IPR001155|NADH:flavin oxidoreductase/NADH oxidase, N-terminal|	1	0	0	0	1	0	1
b84	b84.a1	jgi|Polbr1|1377623|estExt_Genewise1.C_130142|CE16|Carbohydrate Esterase Family 16 protein|IPR001087|Lipase, GDSL|IPR013830|Esterase, SGNH hydrolase-type|	1	0	1	0	1	0	0
b85	b85.a1	jgi|Polbr1|1355486|e_gw1.46.159.1|IPR002509|Polysaccharide deacetylase|IPR011330|Glycoside hydrolase/deacetylase, beta/alpha-barrel|	1	0	2	0	0	0	0
b86	b86.a1	jgi|Polbr1|1353832|e_gw1.39.191.1|GH16|Glycoside Hydrolase Family 16 protein|IPR008985|Concanavalin A-like lectin/glucanase|	1	0	0	1	1	0	0
b87	b87.a1	jgi|Polbr1|1485200|gm1.8781_g|	1	0	2	0	0	0	0

## Sheet: Compare PAI Pbr985 LTQ-Orbi
Proteomics complementary data for Pbr985. Protein Abundance Index (PAI) in each condition (Maltose + Lignin and Lignin) at days 7 and 14 following the LTQ-Orbitrap analysis methods.
				Day3_Maltose+Lignin	Day3_Lignin	Day7_Maltose+Lignin	Day7_Lignin	Day14_Maltose+Lignin	Day14_Lignin
Group ID	Sub-group ID	Protein Description	Number of proteins	PAI
a1	a1.a1	jgi|Polbr1|224137|CE224136_76555|AA1_1|Laccase|IPR001117|Multicopper oxidase. type 1|IPR011706|Multicopper oxidase. type 2|IPR011707|Multicopper oxidase. type 3|IPR002355|Multicopper oxidase. copper-binding site|IPR008972|Cupredoxin|	1	0.4	0.6	2.1	1	1.3	1.1
a1	a1.a2	jgi|Polbr1|657909|CE657908_4567|AA1_1|Laccase|IPR001117|Multicopper oxidase. type 1|IPR011706|Multicopper oxidase. type 2|IPR011707|Multicopper oxidase. type 3|IPR002355|Multicopper oxidase. copper-binding site|IPR008972|Cupredoxin|	1	0.666666666666667	1.33333333333333	1.66666666666667	0.5	0.5	0.166666666666667
a2	a2.a1	jgi|Polbr1|1388977|estExt_Genewise1.C_680026|AA7|Glucooligosaccharide oxidase|IPR006094|FAD linked oxidase. N-terminal|IPR012951|Berberine/berberine-like|IPR016166|FAD-binding. type 2|	1	0.7	1	2.5	1.2	1.4	1
a3	a3.a1	jgi|Polbr1|1500721|MIX9437_110063_81|GH92|Glycoside Hydrolase Family 92 protein|IPR012939|Glycosyl hydrolase 92|IPR005887|Alpha-1.2-mannosidase. putative|IPR008928|Six-hairpin glycosidase-like|	1	0.285714285714286	0.714285714285714	0.714285714285714	0.333333333333333	0.476190476190476	0.333333333333333
a3	a3.a2	jgi|Polbr1|1400602|fgenesh1_kg.13_#_147_#_Locus1500v1rpkm106.56|GH92|Glycoside Hydrolase Family 92 protein|IPR012939|Glycosyl hydrolase 92|IPR008928|Six-hairpin glycosidase-like|IPR016040|NAD(P)-binding|	1			0.0869565217391304			0.0434782608695652
a4	a4.a1	jgi|Polbr1|1349191|e_gw1.22.85.1|GH15-CBM20|Glycoside Hydrolase Family 15 / Carbohydrate-Binding Module Family 20 protein|IPR002044|Glycoside hydrolase. carbohydrate-binding|IPR000165|Glycoside hydrolase. family 15|IPR002044|Glycoside hydrolase. carbohydrate-binding|IPR011613|Glycoside hydrolase 15-related|IPR008291|Glucan 1.4-alpha-glucosidase. starch-binding|IPR002044|Glycoside hydrolase. carbo…	1	0.3	0.4	2.3	0.5	1.1	0.6
a5	a5.a1	jgi|Polbr1|1488971|gm1.12552_g|GH55|Glycoside Hydrolase Family 55 protein|IPR011050|Pectin lyase fold/virulence factor|	1	0.0769230769230769	0.615384615384615	1.07692307692308	0.461538461538462	0.923076923076923	0.307692307692308
a6	a6.a1	jgi|Polbr1|346399|CE346398_94425|	1	0.1	0.4	0.4	0.1	0.2	0.15
a6	a6.a2	jgi|Polbr1|1347831|e_gw1.18.256.1|	1	0.333333333333333	0.666666666666667	0.75	0.166666666666667	0.25	0.0833333333333333
a7	a7.a1	jgi|Polbr1|1338184|e_gw1.3.371.1|GH27|Glycoside Hydrolase Family 27 protein|IPR000111|Glycoside hydrolase. clan GH-D|IPR002241|Glycoside hydrolase. family 27|IPR000111|Glycoside hydrolase. clan GH-D|IPR000111|Glycoside hydrolase. clan GH-D|IPR017853|Glycoside hydrolase. catalytic core|	1	0.25	0.5625	0.4375	0.375	0.4375	0.1875
a8	a8.a1	jgi|Polbr1|1401868|fgenesh1_kg.18_#_119_#_Locus174v1rpkm732.12|	1	0.25	0.583333333333333	0.416666666666667	0.5	0.416666666666667	0.583333333333333
a9	a9.a1	jgi|Polbr1|748989|CE748988_52067|IPR014870|Region of unknown function DUF1793|IPR008928|Six-hairpin glycosidase-like|	1		0.0555555555555556	0.222222222222222	0.555555555555556	0.388888888888889	0.611111111111111
b10	b10.a1	jgi|Polbr1|1407721|fgenesh1_kg.56_#_34_#_Locus1356v1rpkm116.62|GH76|Glycoside Hydrolase Family 76 protein|IPR005198|Glycoside hydrolase. family 76|IPR008928|Six-hairpin glycosidase-like|	1		0.25	1	0.375	0.5	0.25
b11	b11.a1	jgi|Polbr1|1408208|fgenesh1_kg.61_#_22_#_Locus7163v1rpkm15.19|IPR000868|Isochorismatase hydrolase|IPR000868|Isochorismatase hydrolase|	1	0.1	0.4	1	0.3	0.6	0.2
b12	b12.a1	jgi|Polbr1|1351752|e_gw1.31.257.1|GH37|Glycoside Hydrolase Family 37 protein|IPR001661|Glycoside hydrolase. family 37|IPR001661|Glycoside hydrolase. family 37|IPR001661|Glycoside hydrolase. family 37|IPR001661|Glycoside hydrolase. family 37|IPR008928|Six-hairpin glycosidase-like|	1	0.166666666666667	0.416666666666667	0.333333333333333	0.125		0.125
b13	b13.a1	jgi|Polbr1|1420175|fgenesh1_pg.49_#_18|AA5_1|Copper radical oxidase|IPR009880|Glyoxal oxidase. N-terminal|IPR015202|Region of unknown function DUF1929|IPR011043|Galactose oxidase/kelch. beta-propeller|IPR014756|Immunoglobulin E-set|	1	0.166666666666667	0.5	0.75	0.25	0.5	0.166666666666667
b14	b14.a1	jgi|Polbr1|1364383|e_gw1.130.38.1|IPR001461|Peptidase A1|IPR001461|Peptidase A1|IPR001969|Peptidase aspartic. active site|IPR009007|Peptidase aspartic. catalytic|	1	0.333333333333333	0.833333333333333	0.666666666666667	0.666666666666667	0.666666666666667	0.5
b15	b15.a1	jgi|Polbr1|1479303|gm1.2884_g|GH7|Glycoside Hydrolase Family 7 protein|IPR001722|Glycoside hydrolase. family 7|IPR001722|Glycoside hydrolase. family 7|IPR001722|Glycoside hydrolase. family 7|IPR008985|Concanavalin A-like lectin/glucanase|	1			0.285714285714286	0.142857142857143	0.285714285714286	0.285714285714286
b15	b15.a2	jgi|Polbr1|355477|CE355476_2182|GH7|Glycoside Hydrolase Family 7 protein|IPR001722|Glycoside hydrolase. family 7|IPR001722|Glycoside hydrolase. family 7|IPR001722|Glycoside hydrolase. family 7|IPR008985|Concanavalin A-like lectin/glucanase|	1			0.2	0.1	0.2	0.2
b16	b16.a1	jgi|Polbr1|1400569|fgenesh1_kg.13_#_114_#_Locus4315v3rpkm0.36_PRE|IPR002018|Carboxylesterase. type B|IPR002018|Carboxylesterase. type B|	1		0.230769230769231	0.846153846153846		0.538461538461538	0.0769230769230769
b17	b17.a1	jgi|Polbr1|1559509|estExt_Genemark1.C_680003|	1	0.0833333333333333	0.583333333333333	0.25	0.166666666666667	0.333333333333333	0.166666666666667
b17	b17.a2	jgi|Polbr1|1421205|fgenesh1_pg.68_#_24|	1		0.666666666666667	0.111111111111111		0.111111111111111	0.111111111111111
b18	b18.a1	jgi|Polbr1|1328989|gw1.85.54.1|	1	0.333333333333333	1	0.222222222222222	0.444444444444444		0.222222222222222
b19	b19.a1	jgi|Polbr1|1447784|estExt_Genewise1Plus.C_970077|GH28|Glycoside Hydrolase Family 28 protein|IPR000743|Glycoside hydrolase. family 28|IPR006626|Parallel beta-helix repeat|IPR000743|Glycoside hydrolase. family 28|IPR011050|Pectin lyase fold/virulence factor|	1			0.5	0.166666666666667	0.416666666666667	0.166666666666667
b20	b20.a1	jgi|Polbr1|1416855|fgenesh1_pg.13_#_122|IPR001461|Peptidase A1|IPR001461|Peptidase A1|IPR001969|Peptidase aspartic. active site|IPR009007|Peptidase aspartic. catalytic|	1	0.2	0.4	0.2	0.4	0.4	0.2
b21	b21.a1	jgi|Polbr1|775754|CE775753_35734|GH31|Glycoside Hydrolase Family 31 protein|IPR000322|Glycoside hydrolase. family 31|IPR000322|Glycoside hydrolase. family 31|IPR017853|Glycoside hydrolase. catalytic core|	1			0.161290322580645	0.0967741935483871	0.129032258064516	0.0967741935483871
b22	b22.a1	jgi|Polbr1|899854|CE899853_5672|IPR006094|FAD linked oxidase. N-terminal|IPR012951|Berberine/berberine-like|IPR016166|FAD-binding. type 2|	1	0.0625	0.5625	0.125	0.125		0.0625
b23	b23.a1	jgi|Polbr1|1400708|fgenesh1_kg.13_#_253_#_Locus10676v1rpkm3.50|IPR001563|Peptidase S10. serine carboxypeptidase|IPR001563|Peptidase S10. serine carboxypeptidase|IPR001563|Peptidase S10. serine carboxypeptidase|IPR001563|Peptidase S10. serine carboxypeptidase|	1	0.2	0.4	0.4	0.2	0.2	0.2
b24	b24.a1	jgi|Polbr1|1437352|estExt_Genewise1Plus.C_210386|GH2|Glycoside Hydrolase Family 2 protein|IPR006102|Glycoside hydrolase family 2. immunoglobulin-like beta-sandwich|IPR008979|Galactose-binding like|IPR017853|Glycoside hydrolase. catalytic core|	1		0.352941176470588	0.235294117647059	0.0588235294117647	0.0588235294117647	0.0588235294117647
b24	b24.a2	jgi|Polbr1|1437365|estExt_Genewise1Plus.C_210399|GH2|Glycoside Hydrolase Family 2 protein|IPR006102|Glycoside hydrolase family 2. immunoglobulin-like beta-sandwich|IPR008979|Galactose-binding like|IPR017853|Glycoside hydrolase. catalytic core|	1		0.0526315789473684	0.157894736842105	0.105263157894737	0.105263157894737	0.0526315789473684
b25	b25.a1	jgi|Polbr1|1347474|e_gw1.18.442.1|GH5_9|Glycoside Hydrolase Family 5 protein|IPR001547|Glycoside hydrolase. family 5|IPR017853|Glycoside hydrolase. catalytic core|	1		0.2	0.5	0.4	0.4
b26	b26.a1	jgi|Polbr1|1544098|MIX52814_7719_36|IPR001563|Peptidase S10. serine carboxypeptidase|IPR001563|Peptidase S10. serine carboxypeptidase|IPR001563|Peptidase S10. serine carboxypeptidase|IPR001563|Peptidase S10. serine carboxypeptidase|IPR001563|Peptidase S10. serine carboxypeptidase|	1		0.117647058823529	0.176470588235294	0.176470588235294	0.176470588235294	0.117647058823529
b27	b27.a1	jgi|Polbr1|1406746|fgenesh1_kg.47_#_65_#_Locus5032v1rpkm29.17|IPR015366|Peptidase S53. propeptide|IPR000209|Peptidase S8 and S53. subtilisin. kexin. sedolisin|IPR009020|Proteinase inhibitor. propeptide|	1	0.0625	0.125	0.1875	0.0625	0.1875	0.0625
b27	b27.a2	jgi|Polbr1|1406960|fgenesh1_kg.49_#_51_#_Locus3221v1rpkm50.04|IPR015366|Peptidase S53. propeptide|IPR000209|Peptidase S8 and S53. subtilisin. kexin. sedolisin|IPR009020|Proteinase inhibitor. propeptide|	1		0.0588235294117647	0.0588235294117647		0.117647058823529
b28	b28.a1	jgi|Polbr1|1490858|gm1.14439_g|IPR001563|Peptidase S10. serine carboxypeptidase|IPR001563|Peptidase S10. serine carboxypeptidase|IPR001563|Peptidase S10. serine carboxypeptidase|IPR001563|Peptidase S10. serine carboxypeptidase|	1			0.375	0.375	0.25	0.375
b29	b29.a1	jgi|Polbr1|165618|CE165617_2833|IPR001938|Thaumatin. pathogenesis-related|IPR001938|Thaumatin. pathogenesis-related|IPR001938|Thaumatin. pathogenesis-related|IPR001938|Thaumatin. pathogenesis-related|IPR001938|Thaumatin. pathogenesis-related|IPR001938|Thaumatin. pathogenesis-related|	1			1	0.5	1	0.5
b30	b30.a1	jgi|Polbr1|615361|CE615360_11270|GH3|Glycoside Hydrolase Family 3 protein|IPR001764|Glycoside hydrolase. family 3. N-terminal|IPR001764|Glycoside hydrolase. family 3. N-terminal|IPR002772|Glycoside hydrolase. family 3. C-terminal|IPR017853|Glycoside hydrolase. catalytic core|IPR002772|Glycoside hydrolase. family 3. C-terminal|	1		0.037037037037037	0.037037037037037	0.0740740740740741	0.185185185185185	0.148148148148148
b31	b31.a1	jgi|Polbr1|1487358|gm1.10939_g|GH35|Glycoside Hydrolase Family 35 protein|IPR001944|Glycoside hydrolase. family 35|IPR001944|Glycoside hydrolase. family 35|IPR017853|Glycoside hydrolase. catalytic core|	1				0.125	0.25	0.166666666666667
b31	b31.a2	jgi|Polbr1|1487357|gm1.10938_g|GH35|Glycoside Hydrolase Family 35 protein|IPR001944|Glycoside hydrolase. family 35|IPR001944|Glycoside hydrolase. family 35|IPR017853|Glycoside hydrolase. catalytic core|	1			0.04		0.08
b32	b32.a1	jgi|Polbr1|1337234|e_gw1.3.310.1|PL8_4|Polysaccharide Lyase Family 8 protein|IPR003159|Polysaccharide lyase family 8. central|IPR008929|Chondroitin AC/alginate lyase|IPR011071|Polysaccharide lyase family 8-like. C-terminal|IPR011013|Glycoside hydrolase-type carbohydrate-binding|	1		0.315789473684211		0.210526315789474		0.105263157894737
b33	b33.a1	jgi|Polbr1|977992|CE977991_41569|	1	0.4	0.4	0.4	0.4	0.4	0.4
b34	b34.a1	jgi|Polbr1|1434324|estExt_Genewise1Plus.C_130135|IPR002018|Carboxylesterase. type B|IPR002018|Carboxylesterase. type B|	1		0.1875	0.1875	0.125	0.125
b35	b35.a1	jgi|Polbr1|1417405|fgenesh1_pg.17_#_102|AA1_1|Laccase|IPR001117|Multicopper oxidase. type 1|IPR011706|Multicopper oxidase. type 2|IPR011707|Multicopper oxidase. type 3|IPR002355|Multicopper oxidase. copper-binding site|IPR002355|Multicopper oxidase. copper-binding site|IPR008972|Cupredoxin|	1	0.125	0.125	0.5	0.125	0.5	0.125
b36	b36.a1	jgi|Polbr1|1484581|gm1.8162_g|GH16|Glycoside Hydrolase Family 16 protein|IPR008985|Concanavalin A-like lectin/glucanase|	1	0.5	0.5	0.5	0.5	0.25	0.25
b37	b37.a1	jgi|Polbr1|1144614|CE1144613_73762|IPR015366|Peptidase S53. propeptide|IPR000209|Peptidase S8 and S53. subtilisin. kexin. sedolisin|IPR000209|Peptidase S8 and S53. subtilisin. kexin. sedolisin|IPR009020|Proteinase inhibitor. propeptide|	1			0.0588235294117647	0.117647058823529	0.176470588235294	0.176470588235294
b38	b38.a1	jgi|Polbr1|1481521|gm1.5102_g|IPR001563|Peptidase S10. serine carboxypeptidase|IPR001563|Peptidase S10. serine carboxypeptidase|IPR001563|Peptidase S10. serine carboxypeptidase|IPR001563|Peptidase S10. serine carboxypeptidase|	1	0.0769230769230769	0.0769230769230769	0.153846153846154	0.0769230769230769	0.153846153846154	0.153846153846154
b39	b39.a1	jgi|Polbr1|1362263|e_gw1.100.3.1|AA5_1|Copper radical oxidase|IPR009880|Glyoxal oxidase. N-terminal|IPR015202|Region of unknown function DUF1929|IPR011043|Galactose oxidase/kelch. beta-propeller|IPR014756|Immunoglobulin E-set|	1	0.0666666666666667	0.266666666666667	0.133333333333333	0.133333333333333	0.0666666666666667
b40	b40.a1	jgi|Polbr1|530269|CE530268_2175|	1			0.129032258064516		0.161290322580645
b41	b41.a1	jgi|Polbr1|1375508|estExt_Genewise1.C_9_t10102|IPR000639|Epoxide hydrolase-like|IPR000073|Alpha/beta hydrolase fold-1|	1			0.214285714285714	0.0714285714285714	0.285714285714286
b42	b42.a1	jgi|Polbr1|1411725|fgenesh1_kg.121_#_26_#_Locus590v1rpkm253.02|IPR015366|Peptidase S53. propeptide|IPR000194|ATPase. F1/V1/A1 complex. alpha/beta subunit. nucleotide-binding|IPR003439|ABC transporter-like|IPR000209|Peptidase S8 and S53. subtilisin. kexin. sedolisin|IPR009020|Proteinase inhibitor. propeptide|	1		0.2	0.5		0.1
b43	b43.a1	jgi|Polbr1|1356067|e_gw1.49.44.1|GH95|Glycoside Hydrolase Family 95 protein|IPR016518|Uncharacterised conserved protein UCP007663|IPR008928|Six-hairpin glycosidase-like|	1	0.0588235294117647	0.117647058823529	0.0588235294117647		0.117647058823529	0.0588235294117647
b44	b44.a1	jgi|Polbr1|1534843|MIX43559_7181_87|	1			0.285714285714286	0.428571428571429	0.285714285714286	0.142857142857143
b45	b45.a1	jgi|Polbr1|1422305|fgenesh1_pg.98_#_18|IPR002018|Carboxylesterase. type B|IPR002018|Carboxylesterase. type B|	1			0.117647058823529	0.0588235294117647	0.117647058823529	0.0588235294117647
b45	b45.a2	jgi|Polbr1|1260852|CE1260851_1225|	1			0.285714285714286		0.285714285714286
b46	b46.a1	jgi|Polbr1|1427816|estExt_Genewise1Plus.C_3_t20484|GH72-CBM43|Glycoside Hydrolase Family 72 / Carbohydrate-Binding Module Family 43 protein|IPR004886|Glycolipid anchored surface protein GAS1|IPR012946|X8|IPR012946|X8|IPR001547|Glycoside hydrolase. family 5|IPR000595|Cyclic nucleotide-binding|IPR017853|Glycoside hydrolase. catalytic core|	1	0.0833333333333333	0.333333333333333	0.0833333333333333
b47	b47.a1	jgi|Polbr1|1338011|e_gw1.3.813.1|CE4|Carbohydrate Esterase Family 4 protein|IPR002509|Polysaccharide deacetylase|IPR011330|Glycoside hydrolase/deacetylase. beta/alpha-barrel|	1	0.111111111111111	0.111111111111111	0.333333333333333	0.111111111111111		0.111111111111111
b48	b48.a1	jgi|Polbr1|1348579|e_gw1.20.24.1|AA5_1|Copper radical oxidase|IPR002889|Carbohydrate-binding WSC|IPR009880|Glyoxal oxidase. N-terminal|IPR015202|Region of unknown function DUF1929|IPR013994|Carbohydrate-binding WSC. subgroup|IPR002889|Carbohydrate-binding WSC|IPR011043|Galactose oxidase/kelch. beta-propeller|IPR014756|Immunoglobulin E-set|	1		0.1	0.1		0.15
b49	b49.a1	jgi|Polbr1|1400420|fgenesh1_kg.12_#_246_#_Locus1381v1rpkm115.15|IPR007312|Phosphoesterase|	1	0.125	0.25	0.25	0.125	0.125
b50	b50.a1	jgi|Polbr1|1339450|e_gw1.5.937.1|IPR001563|Peptidase S10. serine carboxypeptidase|IPR001563|Peptidase S10. serine carboxypeptidase|IPR001563|Peptidase S10. serine carboxypeptidase|	1		0.111111111111111	0.333333333333333		0.333333333333333
b51	b51.a1	jgi|Polbr1|677637|CE677636_38414|IPR015366|Peptidase S53. propeptide|IPR000209|Peptidase S8 and S53. subtilisin. kexin. sedolisin|IPR000209|Peptidase S8 and S53. subtilisin. kexin. sedolisin|IPR009020|Proteinase inhibitor. propeptide|	1		0.0588235294117647	0.117647058823529	0.117647058823529	0.0588235294117647	0.0588235294117647
b52	b52.a1	jgi|Polbr1|1460895|estExt_fgenesh1_pm.C_40005|IPR001461|Peptidase A1|IPR001461|Peptidase A1|IPR001969|Peptidase aspartic. active site|IPR009007|Peptidase aspartic. catalytic|	1		0.0909090909090909		0.181818181818182	0.181818181818182	0.0909090909090909
b53	b53.a1	jgi|Polbr1|1354493|e_gw1.42.177.1|IPR002018|Carboxylesterase. type B|IPR002018|Carboxylesterase. type B|IPR002018|Carboxylesterase. type B|	1			0.037037037037037	0.037037037037037	0.037037037037037	0.111111111111111
b54	b54.a1	jgi|Polbr1|1405628|fgenesh1_kg.39_#_11_#_Locus8v1rpkm5021.64|IPR000173|Glyceraldehyde 3-phosphate dehydrogenase|IPR000173|Glyceraldehyde 3-phosphate dehydrogenase|IPR000173|Glyceraldehyde 3-phosphate dehydrogenase|IPR000173|Glyceraldehyde 3-phosphate dehydrogenase|IPR006424|Glyceraldehyde-3-phosphate dehydrogenase. type I|IPR000173|Glyceraldehyde 3-phosphate dehydrogenase|IPR016040|NAD(P)-binding|	1		0.153846153846154	0.0769230769230769	0.0769230769230769	0.0769230769230769
b55	b55.a1	jgi|Polbr1|1338413|e_gw1.3.932.1|GH16|Glycoside Hydrolase Family 16 protein|IPR008985|Concanavalin A-like lectin/glucanase|	1				0.222222222222222		0.333333333333333
b56	b56.a1	jgi|Polbr1|1457484|fgenesh1_pm.56_#_11|GH16|Glycoside Hydrolase Family 16 protein|IPR008985|Concanavalin A-like lectin/glucanase|	1			0.333333333333333	0.333333333333333	0.333333333333333	0.666666666666667
b57	b57.a1	jgi|Polbr1|1346110|e_gw1.14.578.1|IPR001951|Histone H4|IPR001951|Histone H4|IPR007125|Histone core|IPR001951|Histone H4|IPR001951|Histone H4|IPR009072|Histone-fold|	5				0.2		0.6
b58	b58.a1	jgi|Polbr1|1399305|fgenesh1_kg.9_#_154_#_Locus582v1rpkm254.86|	1		0.5		0.5		0.25
b59	b59.a1	jgi|Polbr1|1399901|fgenesh1_kg.11_#_7_#_Locus3398v1rpkm47.19|GH27|Glycoside Hydrolase Family 27 protein|IPR000111|Glycoside hydrolase. clan GH-D|IPR002241|Glycoside hydrolase. family 27|IPR000111|Glycoside hydrolase. clan GH-D|IPR017853|Glycoside hydrolase. catalytic core|	1		0.0588235294117647	0.117647058823529	0.0588235294117647	0.0588235294117647
b60	b60.a1	jgi|Polbr1|835216|CE835215_1786|CE8|Carbohydrate Esterase Family 8 protein|IPR000070|Pectinesterase. catalytic|IPR011050|Pectin lyase fold/virulence factor|	1			0.142857142857143		0.142857142857143
b61	b61.a1	jgi|Polbr1|1397005|fgenesh1_kg.4_#_331_#_Locus253v1rpkm562.78|IPR001461|Peptidase A1|IPR001461|Peptidase A1|IPR001969|Peptidase aspartic. active site|IPR009007|Peptidase aspartic. catalytic|	1				0.214285714285714		0.0714285714285714
b62	b62.a1	jgi|Polbr1|1395134|fgenesh1_kg.1_#_494_#_Locus1806v1rpkm89.95|IPR006045|Cupin 1|IPR013096|Cupin 2. conserved barrel|IPR017774|Bicupin. oxalate decarboxylase/oxidase|IPR000276|GPCR. rhodopsin-like|IPR011051|Cupin. RmlC-type|	1			0.0769230769230769		0.153846153846154
b63	b63.a1	jgi|Polbr1|1352774|e_gw1.35.11.1|IPR012878|Protein of unknown function DUF1680|	1			0.136363636363636	0.0454545454545455
b64	b64.a1	jgi|Polbr1|497798|CE497797_2765|IPR005135|Endonuclease/exonuclease/phosphatase|IPR005135|Endonuclease/exonuclease/phosphatase|	1			0.111111111111111	0.0555555555555556		0.0555555555555556
b65	b65.a1	jgi|Polbr1|1478588|gm1.2169_g|IPR001461|Peptidase A1|IPR001461|Peptidase A1|IPR001969|Peptidase aspartic. active site|IPR001220|Legume lectin. beta domain|IPR009007|Peptidase aspartic. catalytic|	1			0.285714285714286		0.285714285714286
b66	b66.a1	jgi|Polbr1|1413263|fgenesh1_kg.230_#_2_#_Locus2088v1rpkm78.33|IPR005135|Endonuclease/exonuclease/phosphatase|IPR005135|Endonuclease/exonuclease/phosphatase|	1			0.0714285714285714	0.0714285714285714	0.142857142857143
b67	b67.a1	jgi|Polbr1|1456450|fgenesh1_pm.35_#_72|GH18|Glycoside Hydrolase Family 18 protein|IPR001579|Glycoside hydrolase. chitinase active site|IPR017853|Glycoside hydrolase. catalytic core|	3			0.6
b68	b68.a1	jgi|Polbr1|1345918|e_gw1.14.167.1|IPR001568|Ribonuclease T2|IPR001568|Ribonuclease T2|IPR001568|Ribonuclease T2|IPR001568|Ribonuclease T2|	1		0.111111111111111	0.222222222222222		0.111111111111111
b69	b69.a1	jgi|Polbr1|1495871|MIX4587_10656_36|GH30_3|Glycoside Hydrolase Family 30 protein|IPR001139|Glycoside hydrolase. family 30|IPR008972|Cupredoxin|IPR017853|Glycoside hydrolase. catalytic core|	1			0.181818181818182		0.181818181818182
b70	b70.a1	jgi|Polbr1|1346223|e_gw1.14.450.1|IPR001384|Peptidase M35. deuterolysin|	1				0.2	0.1
b71	b71.a1	jgi|Polbr1|1410461|fgenesh1_kg.92_#_47_#_Locus864v1rpkm175.83|CBM18-GH16|Carbohydrate-Binding Module Family 18 / Glycoside Hydrolase Family 16 protein|IPR000757|Glycoside hydrolase. family 16|IPR001002|Chitin-binding. type 1|IPR008985|Concanavalin A-like lectin/glucanase|	1		0.142857142857143	0.142857142857143		0.142857142857143
b72	b72.a1	jgi|Polbr1|1399130|fgenesh1_kg.8_#_433_#_Locus7121v1rpkm15.40|GH71|Glycoside Hydrolase Family 71 protein|IPR005197|Glycoside hydrolase. family 71|IPR005197|Glycoside hydrolase. family 71|	1			0.0833333333333333	0.166666666666667
b73	b73.a1	jgi|Polbr1|1346712|e_gw1.16.453.1|IPR005198|Glycoside hydrolase. family 76|IPR008928|Six-hairpin glycosidase-like|	1		0.333333333333333
b74	b74.a1	jgi|Polbr1|1362054|e_gw1.97.19.1|IPR002018|Carboxylesterase. type B|IPR002018|Carboxylesterase. type B|	1				0.0588235294117647		0.117647058823529
b75	b75.a1	jgi|Polbr1|1483812|gm1.7393_g|IPR008183|Aldose 1-epimerase|IPR011013|Glycoside hydrolase-type carbohydrate-binding|	1				0.0666666666666667		0.133333333333333
b76	b76.a1	jgi|Polbr1|1357935|e_gw1.60.61.1|IPR001842|Peptidase M36. fungalysin|IPR001842|Peptidase M36. fungalysin|IPR011096|Propeptide. peptidase M4 and M36|IPR001425|Rhodopsin. bacterial|	1				0.0625		0.125
b77	b77.a1	jgi|Polbr1|397425|CE397424_1271|GH93|Glycoside Hydrolase Family 93 protein|IPR002860|BNR repeat|IPR011040|Neuraminidase|	1				0.181818181818182
b78	b78.a1	jgi|Polbr1|1349136|e_gw1.22.281.1|	1					0.666666666666667
b79	b79.a1	jgi|Polbr1|1352206|e_gw1.33.115.1|GH79|Glycoside Hydrolase Family 79 protein|	1					0.166666666666667
b80	b80.a1	jgi|Polbr1|1401242|fgenesh1_kg.15_#_223_#_Locus4046v3rpkm20.75|IPR011024|Gamma-crystallin related|	1		1		2
b81	b81.a1	jgi|Polbr1|1348020|e_gw1.19.318.1|IPR000164|Histone H3|IPR007125|Histone core|IPR000164|Histone H3|IPR000164|Histone H3|IPR000164|Histone H3|IPR009072|Histone-fold|	4						0.666666666666667
b82	b82.a1	jgi|Polbr1|1551444|estExt_Genemark1.C_30149|IPR000795|Protein synthesis factor. GTP-binding|IPR000795|Protein synthesis factor. GTP-binding|IPR004160|Translation elongation factor EFTu/EF1A. C-terminal|IPR004161|Translation elongation factor EFTu/EF1A. domain 2|IPR004539|Translation elongation factor EF1A. eukaryotic and archaeal|IPR000795|Protein synthesis factor. GTP-binding|IPR009000|Translati…	1				0.133333333333333
b83	b83.a1	jgi|Polbr1|1445296|estExt_Genewise1Plus.C_650102|IPR001155|NADH:flavin oxidoreductase/NADH oxidase. N-terminal|	1				0.0588235294117647		0.0588235294117647
b84	b84.a1	jgi|Polbr1|1377623|estExt_Genewise1.C_130142|CE16|Carbohydrate Esterase Family 16 protein|IPR001087|Lipase. GDSL|IPR013830|Esterase. SGNH hydrolase-type|	1		0.111111111111111		0.111111111111111
b85	b85.a1	jgi|Polbr1|1355486|e_gw1.46.159.1|IPR002509|Polysaccharide deacetylase|IPR011330|Glycoside hydrolase/deacetylase. beta/alpha-barrel|	1		0.25
b86	b86.a1	jgi|Polbr1|1353832|e_gw1.39.191.1|GH16|Glycoside Hydrolase Family 16 protein|IPR008985|Concanavalin A-like lectin/glucanase|	1			0.166666666666667	0.166666666666667
b87	b87.a1	jgi|Polbr1|1485200|gm1.8781_g|	1		0.5

[truncated: 4 more sheets: Compare spectra Psan1264 LTQ-Or, Compare PAI Psan1264 LTQ-Orbi, Compare spectra Lme1369 LTQ-Orb, Compare PAI Lme1369 LTQ-Orbi]
